# Supplementary material for: Advances in predictive chemistry enable a multi-scale rational design approach for biofuels with advantaged properties
Source: Royal Society of Chemistry journal article supplement (doi:10.1039/d2se00773h), 2022-01-01
Supplement: d2se00773h1.pdf [file d2se00773h1.pdf]

**Advances in predictive chemistry enable a multiscale rational design approach  
for biofuels with advantaged properties**

*SUPPORTING INFORMATION*

*Katherine S. Lockwood<sup>a</sup>, Sheikh F. Ahmed<sup>b</sup>, Nabila A. Huq<sup>b</sup>, Sadie C. Stutzman<sup>a</sup>, Thomas D. Foust<sup>b</sup>, and Nicole J. Labbe<sup>a,†</sup>*

Department of Mechanical Engineering, University of Colorado Boulder,  
Boulder, CO 80309, USA

---

<sup>a</sup> Department of Mechanical Engineering, University of Colorado Boulder, Boulder, CO, USA

<sup>b</sup> National Bioenergy Center, National Renewable Energy Laboratory, Golden, CO, USA

†Dr. Nicole J. Labbe; UCB42 - Mechanical Engineering

1111, Engineering Drive, Boulder, CO 80309-0427, USA; Phone: (303) 735-4821; E-mail: nicole.labbe@colorado.edu.

|                                                                                                                                                                                                                                                                                                                                                                                                                                                                                                                                                      |    |
|------------------------------------------------------------------------------------------------------------------------------------------------------------------------------------------------------------------------------------------------------------------------------------------------------------------------------------------------------------------------------------------------------------------------------------------------------------------------------------------------------------------------------------------------------|----|
| <b>Potential Energy Surface Generation Details:</b> .....                                                                                                                                                                                                                                                                                                                                                                                                                                                                                            | 4  |
| <b>A) Additional Kinbot Settings and Capabilities</b> .....                                                                                                                                                                                                                                                                                                                                                                                                                                                                                          | 4  |
| <b>B) Comparison of calculated potential energy surfaces with previous literature data</b> .....                                                                                                                                                                                                                                                                                                                                                                                                                                                     | 5  |
| • <b>Figure S1.</b> PESs calculated at the CCSD(T)/cc-pV $\infty$ Z//M06-2X/cc-pVTZ level of theory for the n-butanol ROO1 (top) and n-pentanol ROO1 (bottom) radicals compared to the corresponding energies from Welz et al. <sup>1</sup> (Top) and Duan et al. <sup>2</sup> (Bottom) in brackets. Energies are given in kcal/mol. Ignition suppression (red) and ignition promotion (green) product energies are highlighted. QOOH and ROO product energies are shown in blue. The pathways shown were turned into rate constants using MESS..... | 6  |
| <b>C) Detailed potential energy surfaces, energetics, geometries, and frequencies for species in the low temperature oxidation chemistry of n-butanol ROO and QOOH radicals originating from fuel radical + O<sub>2</sub>.</b> .....                                                                                                                                                                                                                                                                                                                 | 7  |
| • <b>Figure S2.</b> Potential energy surface for n-Butanol ROO1 calculated at CCSD(T)/cc-pV $\infty$ Z//M06-2X/cc-pVTZ level of theory. Energies are given in kcal/mol. QOOH energies are given in blue, HO <sub>2</sub> producing routes in red, OH producing rates in green. ....                                                                                                                                                                                                                                                                  | 7  |
| • <b>Table S1.</b> Calculated relative energies for n-Butanol ROO1 PES for pathways included in the rate constant calculations .....                                                                                                                                                                                                                                                                                                                                                                                                                 | 7  |
| • <b>Table S2.</b> Optimized geometries and frequencies (m062x/cc-pVTZ) of relevant stationary points on the calculated n-Butanol ROO1 PES .....                                                                                                                                                                                                                                                                                                                                                                                                     | 8  |
| • <b>Figure S3.</b> Potential energy surface for n-Butanol ROO2 calculated at CCSD(T)/cc-pV $\infty$ Z//M06-2X/cc-pVTZ level of theory. Energies are given in kcal/mol. QOOH energies are given in blue, HO <sub>2</sub> producing routes in red, OH producing rates in green. ....                                                                                                                                                                                                                                                                  | 16 |
| • <b>Table S3.</b> Calculated relative energies for n-Butanol ROO2 PES .....                                                                                                                                                                                                                                                                                                                                                                                                                                                                         | 16 |
| • <b>Table S4.</b> Optimized geometries and frequencies (m062x/cc-pVTZ) of relevant stationary points on the calculated n-Butanol ROO2 PES .....                                                                                                                                                                                                                                                                                                                                                                                                     | 17 |
| • <b>Figure S4.</b> Potential energy surface for n-Butanol ROO3 calculated at CCSD(T)/cc-pV $\infty$ Z//M06-2X/cc-pVTZ level of theory. Energies are given in kcal/mol. QOOH energies are given in blue, HO <sub>2</sub> producing routes in red, OH producing rates in green. ....                                                                                                                                                                                                                                                                  | 25 |
| • <b>Table S5.</b> Calculated relative energies for n-Butanol ROO3 PES .....                                                                                                                                                                                                                                                                                                                                                                                                                                                                         | 25 |
| • <b>Table S6.</b> Optimized geometries and frequencies (m062x/cc-pVTZ) of relevant stationary points on the calculated n-Butanol ROO3 PES .....                                                                                                                                                                                                                                                                                                                                                                                                     | 26 |
| • <b>Figure S5.</b> Potential energy surface for n-Butanol ROO4 calculated at CCSD(T)/cc-pV $\infty$ Z//M06-2X/cc-pVTZ level of theory. Energies are given in kcal/mol. QOOH energies are given in blue, HO <sub>2</sub> producing routes in red, OH producing rates in green. ....                                                                                                                                                                                                                                                                  | 35 |
| • <b>Table S7.</b> Calculated relative energies for n-Butanol ROO4 PES .....                                                                                                                                                                                                                                                                                                                                                                                                                                                                         | 35 |

- **Table S8.** Optimized geometries and frequencies (m062x/cc-pVTZ) of relevant stationary points on the calculated n-Butanol ROO4 PES .....36

**D) Detailed potential energy surfaces, energetics, geometries, and frequencies for species in the low temperature oxidation chemistry of n-pentanol ROO and QOOH radicals originating from fuel radical + O<sub>2</sub>.....44**

- **Figure S6.** Potential energy surface for n-Pentanol ROO1 calculated at CCSD(T)/cc-pV $\infty$ Z//M06-2X/cc-pVTZ level of theory. Energies are given in kcal/mol. QOOH energies are given in blue, HO<sub>2</sub> producing routes in red, OH producing rates in green.....44
- **Table S9.** Calculated relative energies for n-Pentanol ROO1 PES.....44
- **Table S10.** Optimized geometries and frequencies (m062x/cc-pVTZ) of relevant stationary points on the calculated n-Pentanol ROO1 PES .....45
- **Figure S7.** Potential energy surface for n-Pentanol ROO2 calculated at CCSD(T)/cc-pV $\infty$ Z//M06-2X/cc-pVTZ level of theory. Energies are given in kcal/mol. QOOH energies are given in blue, HO<sub>2</sub> producing routes in red, OH producing rates in green.....55
- **Table S11.** Calculated relative energies for n-Pentanol ROO2 PES.....55
- **Table S12.** Optimized geometries and frequencies (m062x/cc-pVTZ) of relevant stationary points on the calculated n-Pentanol ROO2 PES .....56
- **Figure S8.** Potential energy surface for n-Pentanol ROO3 calculated at CCSD(T)/cc-pV $\infty$ Z//M06-2X/cc-pVTZ level of theory. Energies are given in kcal/mol. QOOH energies are given in blue, HO<sub>2</sub> producing routes in red, OH producing rates in green.....65
- **Table S13.** Calculated relative energies for n-Pentanol ROO3 PES.....65
- **Table S14.** Optimized geometries and frequencies (m062x/cc-pVTZ) of relevant stationary points on the calculated n-Pentanol ROO3 PES .....66
- **Figure S9.** Potential energy surface for n-Pentanol ROO4 calculated at CCSD(T)/cc-pV $\infty$ Z//M06-2X/cc-pVTZ level of theory. Energies are given in kcal/mol. QOOH energies are given in blue, HO<sub>2</sub> producing routes in red, OH producing rates in green.....75
- **Table S15.** Calculated relative energies for n-Pentanol ROO4 PES.....75
- **Table S16.** Optimized geometries and frequencies (m062x/cc-pVTZ) of relevant stationary points on the calculated n-Pentanol ROO4 PES .....76

**Rate Constant Calculation and Modeling Details: .....85**

**A) Updated Rate Constants in Chemkin-PLOG Format: .....85**

- **Table S17.** Reaction rate constants and updated thermo calculated in this work for the n-butanol ROO and QOOH decompositions. A species glossary is given in the supplemental material as an excel document.....85

|                                                                                                                                                                                                                                                                                                                                                                                                                                                   |                      |
|---------------------------------------------------------------------------------------------------------------------------------------------------------------------------------------------------------------------------------------------------------------------------------------------------------------------------------------------------------------------------------------------------------------------------------------------------|----------------------|
| <ul style="list-style-type: none"> <li>• <b>Table S18.</b> Reaction rate constants calculated in this work for the n-pentanol ROO and QOOH decompositions. A species glossary is given in the supplemental material as an excel document. ....</li> </ul>                                                                                                                                                                                         | 89                   |
| <b>B) Predicted modeling data:</b> .....                                                                                                                                                                                                                                                                                                                                                                                                          | 95                   |
| <ul style="list-style-type: none"> <li>• <b>Table S19.</b> Predicted IDT values for n-butanol. ....</li> <li>• <b>Figure S10.</b> Comparison of predicted n-butanol IDTs between the Saggese et al.<sup>4</sup> and updated mechanisms. ....</li> <li>• <b>Table S20.</b> Predicted IDT values for n-pentanol.....</li> <li>• <b>Figure S11.</b> Comparison of predicted n-pentanol IDTs between the base and updated mechanisms. ....</li> </ul> | 95<br>96<br>96<br>99 |

## Potential Energy Surface Generation Details:

### A) Additional Kinbot Settings and Capabilities

While KinBot does have the ability to automatically perform conformer searches to find the lowest energy configuration we did not use this feature because it substantially increased computational time. There are ways to limit the number of conformers searched including using keywords such as “random\_conf” which sets the number of random conformers explored if an exhaustive conformer search is not selected. Additionally, the keyword “max\_dihed”, can be used to set the maximum number of dihedrals explored during an exhaustive conformer search. While these features may be useful in some settings, they were not utilized in our KinBot jobs, as we had other methods to identify the lowest energy conformer.

KinBot can also perform hindered rotor scans. The rotor scans are a combination of single point energy calculations thus making it somewhat difficult to view the potential because of the 36 separate jobs it creates (when scanning in 10-degree increments for 360 degrees). We also found for these larger chain molecules with multiple oxygens the rotors are not always straight forward resulting in large jumps or discontinuities in the KinBot rotor profiles. For these reasons we have chosen to set up the rotor scans in Gaussian manually resulting in a single job that allows us to view and diagnose issues in the rotor profiles more easily.

Another useful feature of KinBot is the automatic intrinsic reaction coordinate (IRC) calculations to confirm expected reactants and products of every transition states. These calculations help weed out unrealistic reactions or “bad” transition state structures identified by KinBot but scanning 3-5 steps in each direction of the transition state structure. While this provides a good first pass screening, we have seen times where unrealistic reactions are still reported by KinBot, thus the use of chemical intuition is still required at times to confirm the feasibility of reported reactions. Occasionally, additional IRC calculations performed at the M06-2x/cc-pVTZ level of theory confirmed expected

reactants and products for questionable transition states. Each scan used between 15-30 points in both directions of the TS structure.

Typically, the KinBot jobs for the ROO species completed with 24 hours, using 1 node and either 8 or 12 cores, at this level of theory. This combination of nodes and cores was found to work well for molecules of this size, with higher number of cores showing a decrease in job efficiency overall. Additional features in KinBot are available to further tailor the job to suit specific applications. (A full list of which can be found on their GitHub Wiki documentation):

<https://github.com/zadorlab/KinBot/wiki/Input-and-Keywords##general-parameters>

## **B) Comparison of calculated potential energy surfaces with previous literature data**

To help further validate our method of calculating energetics, we compare the energies calculated in this work to previously published work for the ROO1 (O<sub>2</sub> addition to the carbon alpha to the OH group) and subsequent QOOH decompositions for both fuels via potential energy surfaces shown in Figure S1. Only pathways included in the rate constant calculations are shown. To our knowledge this is the only O<sub>2</sub> addition site that has been studied theoretically for both fuels. Energetics published by Welz et al.<sup>1</sup> calculated at the CBS-QB3 levels of for the n-butanol ROO1, and energetics published by Duan et al.<sup>2</sup>

at the CCSD(T)/aug-cc-pVTZ//M06-2X/cc-pVTZ level of theory for n-pentanol ROO1 are used for comparison. In most cases there was relatively good agreement between this work and the Welz et al.<sup>1</sup> and Duan et al.<sup>2</sup> studies which helps validates our chosen approach. The new energies calculated shown in Figure S1 differ from the Welz et al.<sup>1</sup> and Duan et al.<sup>2</sup> energies by a mean absolute error of 0.9 kcal/mol and 2.8 kcal/mol respectively. There was up to 4.1 kcal/mol difference for transition states and up to 5.6 kcal/mol difference for stable products. Many of the starting structures were taken directly from Welz et al.<sup>1</sup> and Duan et al.<sup>2</sup> and confirmed to be the lowest energy conformer with hindered rotor scans, but in some cases lower energy conformers were identified. Thus, the difference in energy is assumed to come from the different level of theory used in this work and the lower energy conformers of select species. These comparisons further support the level of theory chosen for this work and our proposed methodology.

The other n-butanol pathways had similar energy differences as reported for the ROO1 when compared to the energies reported by Welz et al.<sup>1</sup>. In the case of n-pentanol, no other studies could be found to compare energetics for the ROO3 and ROO4. Full PESs for each ROO through QOOH decomposition pathways for which rate constants were calculated are presented in the next section.

---

<sup>1</sup> O. Welz, J. Zádor, J. D. Savee, L. Sheps, D. L. Osborn, and C. A. Taatjes, "Low-Temperature Combustion Chemistry of n-Butanol: Principal Oxidation Pathways of Hydroxybutyl Radicals," *J. Phys. Chem. A*, vol. 117, no. 46, pp. 11983–12001, Nov. 2013, doi: 10.1021/jp403792t.

<sup>2</sup> Y. Duan *et al.*, "Oxidation kinetics of n-pentanol: A theoretical study of the reactivity of the 1-hydroxy-1-peroxypropyl radical," *Combust. Flame*, vol. 219, pp. 20–32, Sep. 2020, doi: 10.1016/j.combustflame.2020.05.014.

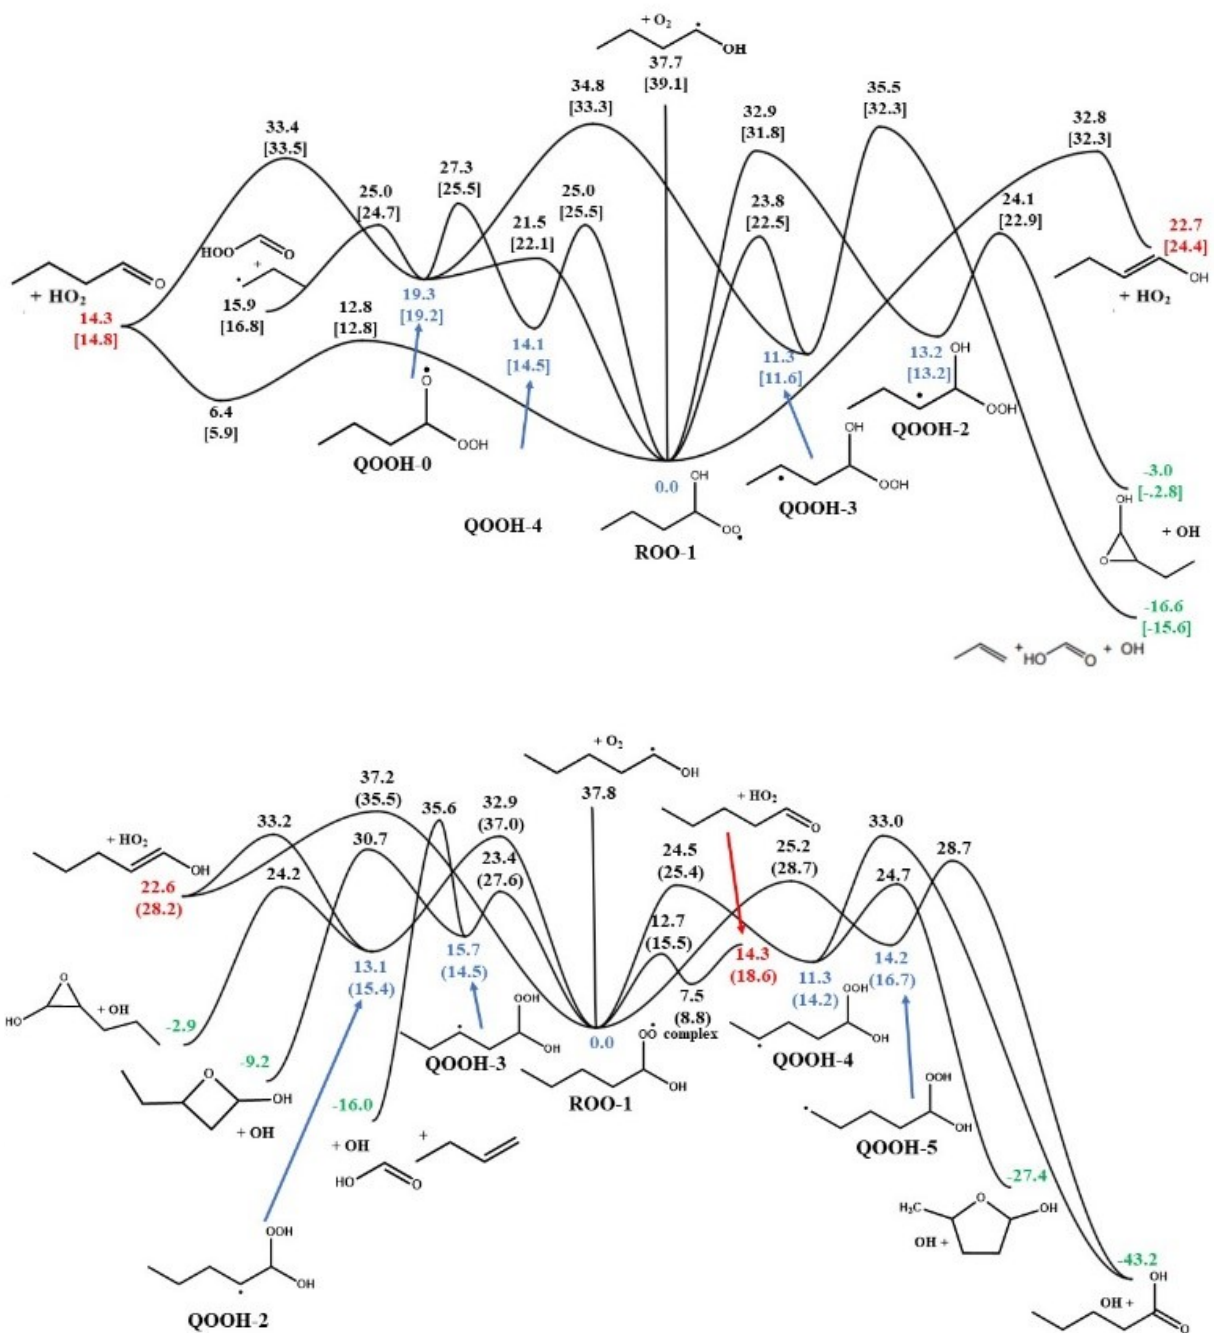

**Figure S1.** PESs calculated at the CCSD(T)/cc-pV $\infty$ Z//M06-2X/cc-pVTZ level of theory for the n-butanol ROO1 (top) and n-pentanol ROO1 (bottom) radicals compared to the corresponding energies from Welz et al.<sup>1</sup> (Top) and Duan et al.<sup>2</sup> (Bottom) in brackets. Energies are given in kcal/mol. Ignition suppression (red) and ignition promotion (green) product energies are highlighted. QOOH and ROO product energies are shown in blue. The pathways shown were turned into rate constants using MESS.

**C) Detailed potential energy surfaces, energetics, geometries, and frequencies for species in the low temperature oxidation chemistry of n-butanol ROO and QOOH radicals originating from fuel radical + O<sub>2</sub>.**

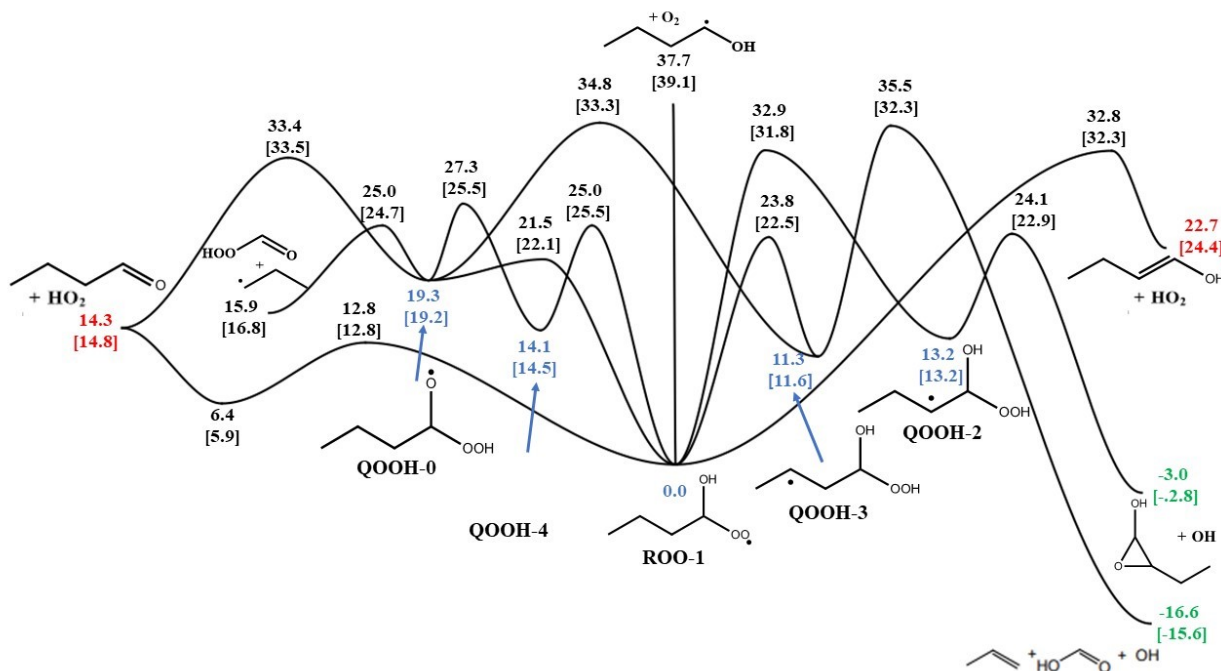

**Figure S2.** Potential energy surface for n-Butanol ROO1 calculated at CCSD(T)/cc-pV $\infty$ Z//M06-2X/cc-pVTZ level of theory. Energies are given in kcal/mol. QOOH energies are given in blue, HO<sub>2</sub> producing routes in red, OH producing rates in green.

**Table S1.** Calculated relative energies for n-Butanol ROO1 PES for pathways included in the rate constant calculations

| Species                                                          | Relative energy (kcal/mol) |
|------------------------------------------------------------------|----------------------------|
| N-Butanol ROO1                                                   | 0.0                        |
| QOOH-0                                                           | 19.3                       |
| QOOH-2                                                           | 13.2                       |
| QOOH-3                                                           | 11.3                       |
| QOOH-4                                                           | 14.1                       |
| Butanal reaction complex                                         | 6.4                        |
| HO <sub>2</sub> + Butanal                                        | 14.3                       |
| O <sub>2</sub> + CH <sub>3</sub> CH <sub>2</sub> CHOH            | 37.7                       |
| HO <sub>2</sub> + 1-Buten-1-ol                                   | 22.7                       |
| Propene + OH + Formic Acid                                       | -16.6                      |
| 3-ethyloxiran-2-ol + OH                                          | -3.0                       |
| Performic acid + CH <sub>3</sub> CH <sub>2</sub> CH <sub>2</sub> | 15.9                       |
| Nbutanol-ROO1 = QOOH-0                                           | 21.5                       |

|                                                                           |      |
|---------------------------------------------------------------------------|------|
| Nbutanol-ROO1 = QOOH-2                                                    | 32.9 |
| Nbutanol-ROO1 = QOOH-3                                                    | 23.8 |
| Nbutanol-ROO1 = QOOH-4                                                    | 25.0 |
| Nbutanol-ROO1 = HO2 butraldehyde complex                                  | 12.8 |
| nbutanol-ROO1 = HO2 + 1buten1ol                                           | 32.8 |
| QOOH-0 = QOOH-4                                                           | 27.3 |
| QOOH-0 = Performic acid + CH <sub>3</sub> CH <sub>2</sub> CH <sub>2</sub> | 25.0 |
| QOOH-0 = QOOH-3                                                           | 34.8 |
| QOOH-0 = HO2 + Butraldehyde                                               | 33.4 |
| QOOH-2 = OH + 3-ethyloxiran-2-ol                                          | 24.1 |
| QOOH-3 = Propene + OH + Formic Acid                                       | 35.5 |

**Table S2.** Optimized geometries and frequencies (m062x/cc-pVTZ) of relevant stationary points on the calculated n-Butanol ROO1 PES

| Species                                                                                              | Geometry   |            |            | Frequencies (cm <sup>-1</sup> ) |         |         |         |
|------------------------------------------------------------------------------------------------------|------------|------------|------------|---------------------------------|---------|---------|---------|
| N-Butanol ROO1<br>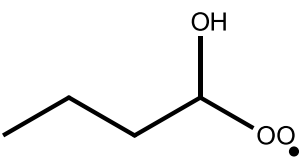 | C          | -0.0012355 | 0.00162506 | 0.00137161                      | 155.68  | 328.89  | 338.14  |
|                                                                                                      | C          | 0.00186215 | -0.0009091 | 1.52408339                      | 400.53  | 545.95  | 644.98  |
|                                                                                                      | C          | 1.41788654 | -0.0020271 | 2.08740614                      | 754.05  | 879.03  | 905.01  |
|                                                                                                      | C          | 1.42363186 | -0.0091047 | 3.59092188                      | 950.11  | 1000.77 | 1072.58 |
|                                                                                                      | O          | 2.82341222 | 0.12477892 | 4.0042098                       | 1116.27 | 1146.33 | 1207.45 |
|                                                                                                      | O          | 2.91514624 | 0.04672785 | 5.29447421                      | 1245.26 | 1292.01 | 1305.72 |
|                                                                                                      | O          | 0.90989492 | -1.1906936 | 4.06959732                      | 1317.33 | 1340.29 | 1375.00 |
|                                                                                                      | H          | 0.51151693 | 0.88163362 | -0.3891217                      | 1407.67 | 1417.50 | 1478.20 |
|                                                                                                      | H          | -1.0163285 | 0.00224155 | -0.3927775                      | 1493.30 | 1499.50 | 1505.12 |
|                                                                                                      | H          | 0.50925962 | -0.8800235 | -0.3877669                      | 1514.19 | 3056.67 | 3057.97 |
|                                                                                                      | H          | -0.5340104 | 0.87594211 | 1.89650903                      | 3062.09 | 3072.41 | 3101.98 |
|                                                                                                      | H          | -0.5290367 | -0.8756366 | 1.90045703                      | 3121.16 | 3134.75 | 3140.39 |
|                                                                                                      | H          | 1.9630224  | -0.885928  | 1.74931238                      | 3845.76 | ! 78.93 | 87.21   |
|                                                                                                      | H          | 1.96662856 | 0.87783262 | 1.74585731                      | 129.72  | 251.45  | 450.85  |
| H                                                                                                    | 0.92309107 | 0.86305039 | 4.02309004 | !Torsions                       |         |         |         |
| H                                                                                                    | 0.94690758 | -1.1641646 | 5.03230196 |                                 |         |         |         |
| QOOH-0<br>        | C          | -0.0056103 | -0.0135481 | 0.02118235                      | 141.78  | 322.31  | 357.63  |
|                                                                                                      | C          | -0.0020473 | 0.01229892 | 1.54421842                      | 374.87  | 509.07  | 649.63  |
|                                                                                                      | H          | 1.00831273 | -0.0156611 | -0.3758086                      | 748.91  | 859.44  | 917.29  |
|                                                                                                      | H          | -0.5151599 | -0.9021034 | -0.353521                       | 961.22  | 1018.81 | 1043.82 |
|                                                                                                      | H          | -0.5213494 | 0.85941814 | -0.3803917                      | 1069.51 | 1088.08 | 1103.66 |
|                                                                                                      | C          | -1.4157116 | 0.00697416 | 2.1060695                       | 1164.63 | 1207.60 | 1266.44 |
|                                                                                                      | H          | 0.54197443 | -0.8540994 | 1.92746594                      | 1286.90 | 1324.71 | 1340.83 |
|                                                                                                      | H          | 0.52434946 | 0.89659781 | 1.90422072                      | 1399.92 | 1417.95 | 1428.25 |
|                                                                                                      | C          | -1.4379975 | 0.05944354 | 3.63830048                      | 1487.64 | 1499.65 | 1505.02 |
|                                                                                                      | H          | -1.9839512 | 0.86238146 | 1.7368336                       | 1515.33 | 2940.14 | 3060.46 |
|                                                                                                      | H          | -1.9529122 | -0.8954122 | 1.81235685                      | 3063.78 | 3080.34 | 3102.92 |
|                                                                                                      | H          | -0.7921532 | -0.7317138 | 4.06101387                      | 3126.43 | 3137.24 | 3141.34 |
|                                                                                                      | O          | -0.941113  | 1.22102374 | 4.09889991                      | 3805.73 | ! 70.14 | 86.13   |
|                                                                                                      | O          | -2.7718837 | -0.1734139 | 4.02940034                      | 165.12  | 248.28  | 284.62  |
| O                                                                                                    | -2.7960535 | -0.2239881 | 5.44472678 | !Torsions                       |         |         |         |
| H                                                                                                    | -2.8089651 | 0.71411406 | 5.67752487 |                                 |         |         |         |
| QOOH-2                                                                                               | C          | -0.0036209 | -0.0086895 | -0.0024534                      | 127.41  | 274.10  | 359.18  |
|                                                                                                      | C          | -0.0001546 | 0.00310372 | 1.52121392                      | 412.83  | 431.80  | 617.16  |



|                                                                                   |                                                                                     |            |            |            |            |         |           |
|-----------------------------------------------------------------------------------|-------------------------------------------------------------------------------------|------------|------------|------------|------------|---------|-----------|
| 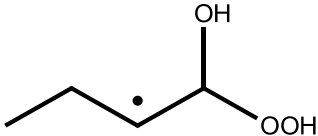 | C                                                                                   | 1.37177871 | 0.00851441 | 2.09143197 | 639.91     | 770.40  | 914.26    |
|                                                                                   | C                                                                                   | 1.60709193 | 0.00099664 | 3.55930406 | 980.94     | 1040.26 | 1062.04   |
|                                                                                   | O                                                                                   | 2.91188367 | 0.37992608 | 3.90957672 | 1071.70    | 1110.32 | 1157.49   |
|                                                                                   | H                                                                                   | 0.50752274 | 0.87038812 | -0.3952891 | 1163.92    | 1246.75 | 1271.22   |
|                                                                                   | H                                                                                   | 0.50791143 | -0.8922706 | -0.3853245 | 1310.84    | 1367.86 | 1411.04   |
|                                                                                   | H                                                                                   | -0.5527461 | 0.86687714 | 1.90024623 | 1417.79    | 1439.84 | 1453.42   |
|                                                                                   | H                                                                                   | -0.5487169 | -0.8687183 | 1.90309042 | 1471.11    | 1503.94 | 1508.38   |
|                                                                                   | H                                                                                   | 2.21977724 | -0.2599591 | 1.47454014 | 3000.24    | 3038.85 | 3063.72   |
|                                                                                   | H                                                                                   | 1.46276303 | -0.9860723 | 4.01301969 | 3066.77    | 3131.66 | 3144.18   |
|                                                                                   | H                                                                                   | 3.14123097 | 1.15439041 | 3.38377416 | 3196.85    | 3788.49 | 3837.76 ! |
|                                                                                   | H                                                                                   | -1.0193712 | -0.0115943 | -0.3938724 | 36.53      | 67.09   | 187.88    |
|                                                                                   | O                                                                                   | 0.6656101  | 0.88350203 | 4.12829432 | 241.36     | 324.28  | 466.27    |
|                                                                                   | O                                                                                   | 0.71432859 | 0.70838574 | 5.53326662 | !Torsions  |         |           |
|                                                                                   | H                                                                                   | 1.58278532 | 1.07606071 | 5.75065216 |            |         |           |
|  | O                                                                                   | 0.00783456 | 0.01028263 | -0.0031942 | 234.64     | 289.37  | 380.37    |
|                                                                                   | C                                                                                   | 0.00274928 | 0.00438847 | 1.39524145 | 401.57     | 427.14  | 615.74    |
|                                                                                   | C                                                                                   | 1.40844996 | 0.00069203 | 1.9992394  | 705.74     | 838.16  | 887.70    |
|                                                                                   | C                                                                                   | 2.27412035 | -1.104074  | 1.48912269 | 968.81     | 988.53  | 1011.14   |
|                                                                                   | C                                                                                   | 2.25074228 | -2.4492443 | 2.12172708 | 1068.53    | 1123.14 | 1157.00   |
|                                                                                   | H                                                                                   | 0.68050291 | -0.6195346 | -0.2916531 | 1171.25    | 1243.67 | 1283.32   |
|                                                                                   | O                                                                                   | -0.6410021 | -1.1513506 | 1.87667924 | 1348.01    | 1371.94 | 1392.01   |
|                                                                                   | O                                                                                   | -1.9968262 | -1.083514  | 1.46786956 | 1418.97    | 1442.78 | 1449.88   |
|                                                                                   | H                                                                                   | 1.22738391 | -2.7747673 | 2.31368367 | 1469.37    | 1482.40 | 1491.49   |
|                                                                                   | H                                                                                   | 2.76352122 | -2.4330598 | 3.09242648 | 3003.09    | 3054.48 | 3090.96   |
|                                                                                   | H                                                                                   | 2.7492529  | -3.1959935 | 1.50597893 | 3107.13    | 3119.84 | 3141.33   |
|                                                                                   | H                                                                                   | -1.9181827 | -1.1560954 | 0.50558872 | 3199.02    | 3783.37 | 3800.75 ! |
|                                                                                   | H                                                                                   | 3.06678313 | -0.8630731 | 0.7948512  | 65.95      | 87.46   | 110.96    |
|                                                                                   | H                                                                                   | 1.29288625 | -0.0674828 | 3.08474851 | 157.46     | 332.77  | 489.39    |
|                                                                                   | H                                                                                   | 1.84626806 | 0.97159433 | 1.76756465 | !Torsions  |         |           |
|                                                                                   | H                                                                                   | -0.5703688 | 0.88008902 | 1.70016268 |            |         |           |
|                                                                                   |  | C          | -0.0020762 | 0.00571731 | 0.00017475 | 210.16  | 331.91    |
| C                                                                                 |                                                                                     | 0.00202531 | -0.0026237 | 2.50333111 | 439.95     | 463.42  | 563.59    |
| C                                                                                 |                                                                                     | 0.83977111 | -0.0054702 | 3.76418032 | 639.10     | 746.71  | 892.29    |
| O                                                                                 |                                                                                     | 0.07745156 | 0.13480173 | 4.93343923 | 924.93     | 1032.60 | 1051.44   |
| H                                                                                 |                                                                                     | -0.6839057 | -0.4516337 | 4.86952136 | 1097.93    | 1109.64 | 1116.26   |
| H                                                                                 |                                                                                     | -0.6310327 | 0.8851272  | 2.53177343 | 1149.93    | 1205.45 | 1263.83   |
| H                                                                                 |                                                                                     | -0.6553567 | -0.8779532 | 2.5255169  | 1317.82    | 1334.85 | 1383.78   |
| H                                                                                 |                                                                                     | 0.41607986 | 0.29872832 | -0.9501347 | 1409.08    | 1440.98 | 1452.10   |
| H                                                                                 |                                                                                     | -0.9820424 | -0.4494413 | 0.00178614 | 1471.52    | 1474.70 | 1486.68   |
| H                                                                                 |                                                                                     | 1.56461613 | 0.8099579  | 3.78513092 | 3011.68    | 3046.08 | 3061.89   |
| O                                                                                 |                                                                                     | 1.52970382 | -1.2301133 | 3.77937889 | 3099.39    | 3116.62 | 3168.80   |
| O                                                                                 |                                                                                     | 2.48287748 | -1.1759618 | 4.82680806 | 3273.92    | 3788.11 | 3846.39 ! |
| H                                                                                 |                                                                                     | 1.91705655 | -1.1705748 | 5.61204048 | 63.62      | 111.58  | 121.40    |
| C                                                                                 |                                                                                     | 0.83662635 | -0.0168072 | 1.22540613 | 133.21     | 275.12  | 358.66    |
| H                                                                                 |                                                                                     | 1.47901359 | -0.9062033 | 1.23940107 | !Torsions  |         |           |
| H                                                                                 | 1.52105587                                                                          | 0.83663903 | 1.2271309  |            |            |         |           |
| Butanal reaction complex                                                          | C                                                                                   | -0.0085244 | -0.0009987 | -0.00188   |            |         |           |
|                                                                                   | C                                                                                   | -0.0100987 | -0.0009525 | 1.49250666 |            |         |           |
|                                                                                   | O                                                                                   | 1.00115322 | -0.0004474 | 2.15797469 |            |         |           |
|                                                                                   | O                                                                                   | -0.9060717 | -0.0013469 | 4.51316228 |            |         |           |
|                                                                                   | O                                                                                   | 0.37665648 | -0.0007083 | 4.76915275 |            |         |           |
|                                                                                   | H                                                                                   | -0.5977748 | 0.86661093 | -0.3210083 |            |         |           |
|                                                                                   | H                                                                                   | -0.5969461 | -0.8691907 | -0.3209535 |            |         |           |
|                                                                                   | H                                                                                   | -0.9887621 | -0.0014057 | 1.99587556 |            |         |           |
|                                                                                   | H                                                                                   | 0.79652379 | -0.0005129 | 3.87318133 |            |         |           |

|                                                                                     |   |            |            |            |           |         |           |
|-------------------------------------------------------------------------------------|---|------------|------------|------------|-----------|---------|-----------|
|                                                                                     | C | 1.37397487 | -0.0003586 | -0.6311232 |           |         |           |
|                                                                                     | C | 1.3040227  | -0.0004411 | -2.1521928 |           |         |           |
|                                                                                     | H | 1.92607469 | -0.8710574 | -0.2756461 |           |         |           |
|                                                                                     | H | 1.92524283 | 0.87088997 | -0.2757023 |           |         |           |
|                                                                                     | H | 2.29983167 | 2.023E-05  | -2.5922618 |           |         |           |
|                                                                                     | H | 0.77636359 | -0.8814996 | -2.5200825 |           |         |           |
|                                                                                     | H | 0.77552229 | 0.88008914 | -2.5201394 |           |         |           |
| HO <sub>2</sub> + Butanal                                                           | O | 0.5055325  | 2.59512924 | 1.6402416  | 1161.48   | 1475.38 | 3553.10   |
| 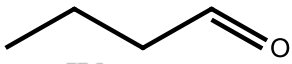   | O | -0.1679742 | 2.44348437 | 0.5078306  |           |         |           |
| + HO <sub>2</sub>                                                                   | H | -0.2367003 | 1.48037439 | 0.3500898  |           |         |           |
|                                                                                     | C | -0.00441   | 6.5214E-05 | 0.01515082 | 198.60    | 351.22  | 670.56    |
|                                                                                     | C | -0.0010062 | -0.0001334 | 1.53786123 | 702.76    | 793.34  | 871.50    |
|                                                                                     | H | 1.00927224 | 0.00029531 | -0.3828154 | 954.96    | 971.92  | 1068.76   |
|                                                                                     | H | -0.5164751 | -0.8805809 | -0.3756112 | 1144.92   | 1164.05 | 1257.19   |
|                                                                                     | H | -0.5167844 | 0.88063386 | -0.3753805 | 1314.53   | 1323.40 | 1404.53   |
|                                                                                     | C | -1.4078027 | -0.0004388 | 2.11022091 | 1418.67   | 1427.04 | 1455.41   |
|                                                                                     | H | 0.53550842 | -0.8703149 | 1.91771071 | 1494.84   | 1506.11 | 1511.73   |
|                                                                                     | H | 0.53522414 | 0.87012322 | 1.91793976 | 1865.57   | 2942.87 | 3036.88   |
|                                                                                     | H | -1.9800247 | 0.86885699 | 1.76638835 | 3057.95   | 3063.44 | 3081.03   |
|                                                                                     | H | -1.9797315 | -0.8698463 | 1.76618297 | 3107.91   | 3131.17 | 3137.91   |
|                                                                                     | C | -1.4563209 | -0.0006242 | 3.61189392 | ! 88.93   | 181.14  | 249.11    |
|                                                                                     | O | -0.487602  | -0.0005392 | 4.32036482 | !Torsions |         |           |
|                                                                                     | H | -2.4711876 | -0.0008527 | 4.05519724 |           |         |           |
| O <sub>2</sub> + CH <sub>3</sub> CH <sub>2</sub> CH <sub>2</sub> CHOH               | O | 0.0000000  | 0.0000000  | 0.00794919 | 1758.25   |         |           |
|  | O | 0.0000000  | 0.0000000  | 1.19781253 |           |         |           |
| + O <sub>2</sub>                                                                    |   |            |            |            | 230.62    | 349.73  | 509.21    |
|                                                                                     | C | -0.0039367 | -0.0052607 | 0.01979238 | 620.02    | 747.83  | 869.06    |
|                                                                                     | C | -0.0038201 | 0.00014303 | 1.54231085 | 890.43    | 997.97  | 1057.72   |
|                                                                                     | H | 1.00880764 | -0.0059568 | -0.3819927 | 1099.94   | 1104.61 | 1227.03   |
|                                                                                     | H | -0.5173174 | -0.88825   | -0.3635314 | 1239.25   | 1290.48 | 1304.68   |
|                                                                                     | H | -0.5195623 | 0.87282133 | -0.3725567 | 1338.93   | 1371.20 | 1412.08   |
|                                                                                     | C | -1.4278088 | 0.00559763 | 2.12005261 | 1455.26   | 1475.52 | 1497.40   |
|                                                                                     | H | 0.52059175 | -0.8768464 | 1.92457696 | 1503.46   | 1511.29 | 3040.59   |
|                                                                                     | H | 0.53372927 | 0.8754132  | 1.91453435 | 3056.21   | 3062.40 | 3086.53   |
|                                                                                     | C | -1.4693365 | -0.0441979 | 3.6007418  | 3105.75   | 3127.87 | 3132.74   |
|                                                                                     | H | -1.9552293 | 0.89929846 | 1.77948852 | 3153.23   | 3905.29 | ! 97.06   |
|                                                                                     | H | -1.9693541 | -0.8584981 | 1.72216816 | 110.21    | 246.78  | 335.14    |
|                                                                                     | H | -1.2919796 | 0.84711318 | 4.19314983 | !Torsions |         |           |
|                                                                                     | O | -1.0300237 | -1.2294756 | 4.1278098  |           |         |           |
|                                                                                     | H | -0.9957258 | -1.1677106 | 5.0845094  |           |         |           |
| HO <sub>2</sub> + 1-Buten-1-ol                                                      | O | 0.5055325  | 2.59512924 | 1.6402416  | 1161.48   | 1475.38 | 3553.10   |
|  | O | -0.1679742 | 2.44348437 | 0.5078306  |           |         |           |
| + HO <sub>2</sub>                                                                   | H | -0.2367003 | 1.48037439 | 0.3500898  |           |         |           |
|                                                                                     | C | 0.01129837 | 0.00358214 | 0.01477432 | 198.80    | 325.75  | 451.54    |
|                                                                                     | C | -0.0023248 | 0.00030064 | 1.54312544 | 541.11    | 783.76  | 852.60    |
|                                                                                     | C | 1.37787198 | -0.0043674 | 2.12660705 | 922.85    | 985.48  | 1034.78   |
|                                                                                     | C | 1.85338103 | 0.96644322 | 2.89334186 | 1097.01   | 1136.87 | 1162.38   |
|                                                                                     | O | 3.09505924 | 1.0376972  | 3.44299897 | 1252.01   | 1300.65 | 1339.99   |
|                                                                                     | H | 0.510588   | 0.89612038 | -0.3616015 | 1353.79   | 1409.41 | 1411.50   |
|                                                                                     | H | -0.999943  | -0.0228673 | -0.3905654 | 1487.78   | 1500.77 | 1509.73   |
|                                                                                     | H | 0.54933961 | -0.864491  | -0.3683461 | 1768.36   | 3051.37 | 3060.79   |
|                                                                                     | H | -0.5441111 | 0.87381188 | 1.91078899 | 3091.05   | 3131.01 | 3138.61   |
|                                                                                     |   |            |            |            | 3143.67   | 3204.04 | 3864.71 ! |

|                                                                                                                                                         |   |               |               |               |                       |         |         |
|---------------------------------------------------------------------------------------------------------------------------------------------------------|---|---------------|---------------|---------------|-----------------------|---------|---------|
|                                                                                                                                                         | H | -0.5535529    | -0.8764444    | 1.89279238    | 103.57                | 215.79  | 410.66  |
|                                                                                                                                                         | H | 2.01981761    | -0.8478365    | 1.88197194    | !Torsions             |         |         |
|                                                                                                                                                         | H | 1.25930771    | 1.83093605    | 3.16325846    |                       |         |         |
|                                                                                                                                                         | H | 3.59834683    | 0.25830996    | 3.18883928    |                       |         |         |
| OH + Propene + Formic Acid<br>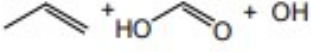                                         | O | 0.00000000    | 0.00000000    | -0.00571069   | 3776.00               |         |         |
|                                                                                                                                                         | H | 0.00000000    | 0.00000000    | 0.96571069    |                       |         |         |
|                                                                                                                                                         | C | 0.01585691    | -0.0854882    | 0.00608506    | 183.19                | 300.73  | 449.63  |
|                                                                                                                                                         | C | -0.0556418    | 0.08794094    | 1.3162727     | 534.72                | 617.79  | 774.75  |
|                                                                                                                                                         | H | 0.85520357    | 0.29776305    | 1.86853711    | 841.90                | 870.41  | 966.21  |
|                                                                                                                                                         | C | -1.3158007    | 0.01746241    | 2.11895409    | 1040.69               | 1061.36 | 1101.47 |
|                                                                                                                                                         | H | 0.95637244    | -0.0231874    | -0.5238575    | 1140.89               | 1185.22 | 1208.36 |
|                                                                                                                                                         | H | -0.8698595    | -0.2966194    | -0.581535     | 1271.47               | 1293.58 | 1334.99 |
|                                                                                                                                                         | H | -2.1742995    | -0.1963687    | 1.48389568    | 1343.64               | 1412.14 | 1423.30 |
|                                                                                                                                                         | H | -1.2484279    | -0.7600202    | 2.88197701    | 1485.76               | 1504.24 | 1510.88 |
|                                                                                                                                                         | H | -1.4981201    | 0.95851749    | 2.64087085    | 1546.00               | 3063.21 | 3071.95 |
|                                                                                                                                                         |   |               |               |               | 3121.21               | 3129.32 | 3141.70 |
|                                                                                                                                                         |   |               |               |               | 3144.81               | 3148.86 | 3870.71 |
|                                                                                                                                                         |   |               |               |               | ! 80.80 226.38 265.94 |         |         |
|                                                                                                                                                         |   |               |               |               | !Torsions             |         |         |
|                                                                                                                                                         | O | -0.0764726    | 0.175471670   | 0.09622945    |                       |         |         |
|                                                                                                                                                         | C | 0.0531058     | 0.034590623   | 1.42022032    | 645.59                | 1077.81 | 1164.30 |
|                                                                                                                                                         | O | 1.0902825     | 0.050749440   | 2.00881646    | 1323.84               | 1418.68 | 1881.20 |
|                                                                                                                                                         | H | 0.8111887     | 0.289072363   | -0.27298859   | 3099.91               | 3799.57 |         |
|                                                                                                                                                         | H | -0.9311085    | -0.097335781  | 1.88192236    | !Torsions 680.90 !    |         |         |
| 3-ethyloxiran-2-ol + OH<br>                                          | O | 0.00000000    | 0.00000000    | -0.00571069   | 3776.00               |         |         |
|                                                                                                                                                         | H | 0.00000000    | 0.00000000    | 0.96571069    |                       |         |         |
|                                                                                                                                                         | C | -0.0048656182 | 0.0052648361  | -0.0066756637 | 168.34                | 342.75  | 372.63  |
|                                                                                                                                                         | C | 0.002279904   | 0.0089069374  | 1.4542068967  | 500.79                | 584.58  | 770.58  |
|                                                                                                                                                         | O | 1.2174921893  | 0.0181235329  | 0.7573723213  | 850.82                | 929.21  | 968.18  |
|                                                                                                                                                         | H | -0.1903033837 | -0.9505528595 | -0.4932385375 | 1030.65               | 1071.38 | 1125.08 |
|                                                                                                                                                         | C | -0.2593001393 | 1.2262351708  | -0.8407644511 | 1140.89               | 1158.60 | 1189.61 |
|                                                                                                                                                         | C | 0.6986887382  | 1.2959666262  | -2.0253585486 | 1290.53               | 1300.74 | 1316.17 |
|                                                                                                                                                         | H | -0.1401241053 | 2.1090528744  | -0.2101407447 | 1349.14               | 1413.27 | 1420.67 |
|                                                                                                                                                         | H | -1.2953249713 | 1.2091370732  | -1.1852754197 | 1479.71               | 1503.13 | 1510.34 |
|                                                                                                                                                         | H | 0.5336526123  | 2.1961493629  | -2.6150941313 | 1543.38               | 3064.26 | 3067.38 |
|                                                                                                                                                         | H | 1.7299090662  | 1.2997996172  | -1.6738585087 | 3102.17               | 3120.26 | 3137.47 |
|                                                                                                                                                         | H | 0.5690261093  | 0.4345911019  | -2.6817017176 | 3146.96               | 3180.00 | 3864.59 |
|                                                                                                                                                         | O | -0.2726337925 | -1.09454965   | 2.2246888182  | ! 92.07 213.70 246.40 |         |         |
|                                                                                                                                                         | H | 0.080091419   | -1.8712621422 | 1.7788761453  | !Torsions             |         |         |
|                                                                                                                                                         | H | -0.2375900616 | 0.9137106846  | 2.0005081352  |                       |         |         |
| Performic acid + CH <sub>3</sub> CH <sub>2</sub> CH <sub>2</sub><br> | C | 0.01538741    | -2.696E-06    | -0.0008042    | 365.53                | 458.65  | 872.98  |
|                                                                                                                                                         | O | 0.02467832    | -1.014E-05    | 1.19505145    | 968.70                | 1035.30 | 1231.32 |
|                                                                                                                                                         | O | 1.11166835    | 1.635E-06     | -0.7598789    | 1379.94               | 1516.73 | 1845.97 |
|                                                                                                                                                         | O | 2.28820566    | -4.694E-06    | 0.02083889    | 3118.91               | 3630.83 |         |
|                                                                                                                                                         | H | -0.8645358    | 1.6062E-06    | -0.6498669    | ! 330.86 !Torsions    |         |         |
|                                                                                                                                                         | H | 1.93021958    | -9.395E-06    | 0.9301233     |                       |         |         |
|                                                                                                                                                         | C | 0.00398392    | -0.0002855    | 0.00920991    | 373.58                | 453.53  | 756.21  |
|                                                                                                                                                         | C | -0.0088492    | 0.00032511    | 1.53512531    | 896.17                | 928.95  | 1053.02 |
|                                                                                                                                                         | C | 1.35655153    | 0.00925395    | 2.12046046    | 1101.17               | 1178.18 | 1271.23 |
|                                                                                                                                                         | H | 0.50409182    | 0.89025944    | -0.3714512    | 1363.51               | 1410.57 | 1469.66 |

|                           |   |            |            |            |           |         |           |
|---------------------------|---|------------|------------|------------|-----------|---------|-----------|
|                           | H | -1.0058669 | -0.0252347 | -0.3981591 | 1474.78   | 1502.40 | 1508.75   |
|                           | H | 0.54159631 | -0.870916  | -0.3683077 | 2984.28   | 3059.08 | 3062.57   |
|                           | H | -0.5754636 | 0.85926903 | 1.90453335 | 3130.39   | 3139.20 | 3166.94   |
|                           | H | -0.5627097 | -0.8813578 | 1.88703798 | 3270.35   |         |           |
|                           | H | 1.52056995 | 0.29075758 | 3.14940954 | ! 93.61   | 253.67  | !Torsions |
|                           | H | 2.18396319 | -0.4237721 | 1.57666755 |           |         |           |
| Nbutanol-ROO1 =<br>QOOH-0 | C | 0.00747065 | -0.0439437 | -0.0126139 | 1098.07i  | 88.28   | 200.68    |
|                           | C | -0.0261458 | -0.016094  | 1.51081071 | 331.31    | 362.44  | 525.63    |
|                           | C | 1.37462868 | 0.07839798 | 2.08962057 | 549.32    | 748.40  | 780.39    |
|                           | C | 1.32007162 | 0.06466735 | 3.65009247 | 827.57    | 881.61  | 895.11    |
|                           | O | 0.85755129 | -1.0056744 | 4.18479723 | 920.82    | 966.41  | 1048.82   |
|                           | O | 2.689984   | 0.34982659 | 4.07454644 | 1067.80   | 1120.62 | 1167.87   |
|                           | O | 3.0758635  | -0.6427866 | 4.91489909 | 1208.26   | 1248.29 | 1275.38   |
|                           | H | 0.57613684 | -0.9019826 | -0.3723315 | 1321.09   | 1348.94 | 1390.51   |
|                           | H | 1.98594992 | -0.7761661 | 1.79810117 | 1415.24   | 1449.35 | 1481.31   |
|                           | H | 1.88016179 | 0.99286822 | 1.77838728 | 1497.99   | 1504.03 | 1512.94   |
|                           | H | 0.79131037 | 0.99676993 | 3.95931921 | 2742.74   | 2814.19 | 3061.15   |
|                           | H | 2.218672   | -1.1904245 | 4.9250732  | 3064.37   | 3081.25 | 3110.02   |
|                           | H | -0.6199505 | 0.83455143 | 1.85378181 | 3131.18   | 3140.53 | 3143.98   |
|                           | H | -0.5073243 | -0.9139054 | 1.89800799 | ! 76.88   | 128.70  | 250.66    |
|                           | H | -0.9981364 | -0.1117662 | -0.4249484 | !Torsions |         |           |
|                           | H | 0.47458748 | 0.8570592  | -0.4118992 |           |         |           |
| Nbutanol-ROO1 =<br>QOOH-2 | C | 0.0080038  | -0.009717  | -0.0055653 | 2090.99i  | 134.44  | 177.61    |
|                           | C | 0.00227015 | -0.0106888 | 1.52493428 | 218.56    | 370.23  | 456.61    |
|                           | O | 1.27561761 | 0.03629074 | 2.06724931 | 558.67    | 622.87  | 749.53    |
|                           | O | -0.7682284 | 1.13774262 | 1.82804968 | 822.13    | 877.88  | 924.68    |
|                           | O | -0.2056067 | 2.11480661 | 0.99426261 | 953.51    | 982.58  | 1032.55   |
|                           | H | 0.02615049 | 1.30950099 | 0.05229016 | 1070.05   | 1114.80 | 1123.71   |
|                           | H | 0.92440292 | -0.3748644 | -0.4634322 | 1164.07   | 1181.08 | 1255.83   |
|                           | H | -0.5147904 | -0.860282  | 1.97246764 | 1279.63   | 1318.74 | 1330.17   |
|                           | H | 1.67335986 | 0.87463157 | 1.80398    | 1400.33   | 1415.82 | 1434.75   |
|                           | C | -1.2660435 | -0.3991714 | -0.6931981 | 1475.59   | 1504.49 | 1507.01   |
|                           | C | -1.2711693 | -0.0383514 | -2.1739221 | 1745.36   | 3016.69 | 3065.17   |
|                           | H | -2.1060621 | 0.07187733 | -0.1788841 | 3090.36   | 3110.32 | 3134.03   |
|                           | H | -1.3979394 | -1.4820927 | -0.5761087 | 3146.08   | 3147.30 | 3837.79   |
|                           | H | -2.193794  | -0.3608409 | -2.6530191 | ! 73.33   | 254.60  | 349.46    |
|                           | H | -1.1817953 | 1.04016537 | -2.3044543 | !Torsions |         |           |
|                           | H | -0.4372809 | -0.5109585 | -2.6937431 |           |         |           |
| Nbutanol-ROO1 =<br>QOOH-3 | C | 0.00838912 | 0.02005395 | 0.01884293 | 1835.41i  | 62.71   | 152.66    |
|                           | C | -0.0083423 | 7.3393E-05 | 1.52191768 | 306.32    | 359.23  | 422.57    |
|                           | C | 1.32340355 | -0.0139021 | 2.22803325 | 468.10    | 487.72  | 548.88    |
|                           | C | 1.34886537 | 0.9704807  | 3.39670466 | 600.12    | 805.61  | 881.43    |
|                           | O | 2.64762227 | 1.10296939 | 3.8427768  | 932.59    | 971.64  | 1025.92   |
|                           | H | 2.65853618 | 1.70337554 | 4.59415038 | 1101.70   | 1107.89 | 1131.68   |
|                           | H | -0.7536405 | -0.6610368 | 1.96071592 | 1153.10   | 1193.29 | 1208.31   |
|                           | H | 1.56527253 | -1.0060146 | 2.61677485 | 1237.09   | 1259.38 | 1317.11   |
|                           | H | 2.12419543 | 0.29393631 | 1.55427784 | 1374.21   | 1385.24 | 1410.81   |
|                           | H | -0.9941838 | 0.11090404 | -0.3949729 | 1451.48   | 1471.81 | 1488.74   |
|                           | H | 0.61269143 | 0.85034832 | -0.3478695 | 1491.76   | 1590.08 | 3033.96   |
|                           | H | 0.44897415 | -0.9028487 | -0.3725932 | 3042.67   | 3060.23 | 3103.64   |
|                           | H | 0.64801964 | 0.68001341 | 4.18694946 | 3114.64   | 3127.62 | 3148.60   |
|                           | O | 0.92521298 | 2.23662407 | 2.90135051 | 3869.92   |         |           |
|                           | O | -0.4364016 | 2.13734799 | 2.67359379 | ! 202.96  | 336.65  | !Torsions |
|                           | H | -0.464266  | 1.18182095 | 1.94298723 |           |         |           |
| Nbutanol-ROO1 =           | C | 0.01906413 | 0.01044152 | 0.00941968 | 1899.51i  | 111.61  | 219.84    |

|                                                         |            |              |               |              |          |           |         |
|---------------------------------------------------------|------------|--------------|---------------|--------------|----------|-----------|---------|
| QOOH-4                                                  | C          | 0.00667583   | 0.01538379    | 1.51622653   | 246.43   | 329.59    | 371.31  |
|                                                         | C          | 1.42496948   | -0.0080907    | 2.10001868   | 453.07   | 462.45    | 548.56  |
|                                                         | C          | 2.04661432   | 1.37670213    | 2.1526128    | 628.83   | 693.96    | 791.53  |
|                                                         | O          | 1.70134217   | 2.18119583    | 1.0337892    | 872.18   | 920.39    | 962.40  |
|                                                         | O          | 1.98561909   | 1.50978963    | -0.1446932   | 1014.29  | 1047.32   | 1098.65 |
|                                                         | H          | 1.02242799   | 0.84464557    | -0.2890817   | 1110.41  | 1118.87   | 1162.25 |
|                                                         | H          | -0.5434991   | -0.8609266    | 1.87092327   | 1178.47  | 1238.54   | 1258.05 |
|                                                         | O          | 3.42029108   | 1.22915427    | 2.28893997   | 1300.70  | 1344.95   | 1375.87 |
|                                                         | H          | 1.42661821   | -0.4051203    | 3.11407845   | 1402.53  | 1454.27   | 1461.90 |
|                                                         | H          | 2.07386299   | -0.6459847    | 1.49891025   | 1480.45  | 1492.00   | 1492.22 |
|                                                         | H          | 0.37912858   | -0.9105027    | -0.4435199   | 3041.10  | 3046.36   | 3087.01 |
|                                                         | H          | -0.8440812   | 0.4323375     | -0.4957401   | 3100.36  | 3109.58   | 3137.65 |
|                                                         | H          | 1.61709554   | 1.96691283    | 2.97039546   | 3198.16  | 3870.75   |         |
|                                                         | H          | 3.82261629   | 2.10232999    | 2.31716014   | ! 339.12 | !Torsions |         |
| H                                                       | -0.5301336 | 0.89068643   | 1.88529892    |              |          |           |         |
| Nbutanol-ROO1 = HO <sub>2</sub><br>butraldehyde complex | O          | 0.00467053   | 0.00418071    | -2.898E-05   | 666.65i  | 135.17    | 222.61  |
|                                                         | C          | 0.00114948   | 0.00096984    | 1.26551269   | 281.31   | 347.96    | 577.37  |
|                                                         | C          | 1.27935721   | -0.0069829    | 2.05193898   | 660.56   | 722.75    | 742.93  |
|                                                         | C          | 2.41458675   | -0.7553949    | 1.36916843   | 801.25   | 854.87    | 879.79  |
|                                                         | C          | 3.69657265   | -0.7085305    | 2.1895961    | 982.85   | 1041.65   | 1060.01 |
|                                                         | O          | -0.5502711   | -1.8138674    | 1.50814378   | 1071.50  | 1142.39   | 1191.69 |
|                                                         | O          | -0.6827677   | -2.1789926    | 0.29612161   | 1263.34  | 1316.70   | 1334.13 |
|                                                         | H          | 4.02426285   | 0.32093193    | 2.34138837   | 1385.25  | 1387.90   | 1411.30 |
|                                                         | H          | 4.50324409   | -1.2458839    | 1.69332117   | 1417.78  | 1462.74   | 1498.21 |
|                                                         | H          | 3.54979803   | -1.1583634    | 3.17246645   | 1505.11  | 1513.24   | 1675.46 |
|                                                         | H          | 2.57871126   | -0.3238466    | 0.38210236   | 1952.85  | 3036.73   | 3051.20 |
|                                                         | H          | 2.11207726   | -1.7924316    | 1.20942341   | 3059.26  | 3074.82   | 3089.33 |
|                                                         | H          | 1.0739521    | -0.4128653    | 3.04529139   | 3112.46  | 3133.61   | 3139.76 |
|                                                         | H          | 1.55455522   | 1.04370379    | 2.19976223   | !76.92   | 86.58     | 248.01  |
| H                                                       | -0.8742844 | 0.40569546   | 1.7869859     | !Torsions    |          |           |         |
| H                                                       | -0.3845644 | -1.1802757   | -0.2060939    |              |          |           |         |
| nbutanol-ROO1 = HO <sub>2</sub> +<br>1-Buten-1-ol       | C          | 0.01467613   | 0.03519313    | 0.02156411   | 1081.77i | 103.68    | 144.57  |
|                                                         | C          | -0.0035916   | -0.0308721    | 1.5458501    | 198.00   | 304.07    | 345.53  |
|                                                         | C          | 1.38614925   | -0.0419086    | 2.15329536   | 501.62   | 535.86    | 580.48  |
|                                                         | C          | 2.04327527   | 1.16526004    | 2.3417863    | 688.66   | 780.34    | 906.70  |
|                                                         | O          | 3.38112323   | 1.19652251    | 2.37551893   | 915.15   | 1019.33   | 1028.60 |
|                                                         | O          | 1.69308687   | 1.33543993    | 4.44995578   | 1099.63  | 1131.49   | 1178.23 |
|                                                         | O          | 1.20454828   | 0.19310566    | 4.6849473    | 1243.49  | 1284.80   | 1298.96 |
|                                                         | H          | 0.56279135   | -0.8110904    | -0.3939178   | 1329.89  | 1363.01   | 1389.43 |
|                                                         | H          | 1.20376964   | -0.2193355    | 3.45715163   | 1398.80  | 1412.84   | 1492.44 |
|                                                         | H          | 2.03542296   | -0.8722734    | 1.88728978   | 1501.08  | 1509.18   | 1634.00 |
|                                                         | H          | 1.52791903   | 2.11361163    | 2.24229916   | 1661.91  | 3057.75   | 3061.22 |
|                                                         | H          | 3.68510753   | 2.02733371    | 2.75375722   | 3096.24  | 3130.44   | 3134.72 |
|                                                         | H          | -0.557304    | 0.82064514    | 1.94949413   | 3150.92  | 3184.71   | 3867.87 |
|                                                         | H          | -0.5450039   | -0.9214473    | 1.867442     | ! 73.33  | 235.45    | 419.34  |
| H                                                       | -0.9941184 | 0.01934291   | -0.3903706    | !Torsions    |          |           |         |
| H                                                       | 0.50807152 | 0.94644214   | -0.3191627    |              |          |           |         |
| QOOH-0 = QOOH-4                                         | C          | 0.0042460083 | -0.0018600773 | 0.0061779677 | 1439.71i | 97.86     | 204.60  |
|                                                         | C          | 0.001924307  | 0.0110231285  | 1.5344424893 | 304.76   | 373.93    | 426.49  |
|                                                         | C          | 1.4462872173 | -0.0121316935 | 2.0398365522 | 471.54   | 597.66    | 624.23  |
|                                                         | C          | 2.2250571547 | 1.1171548146  | 1.4150160047 | 717.76   | 856.74    | 876.27  |
|                                                         | H          | 3.2853327232 | 0.9451055408  | 1.2550144832 | 903.03   | 963.22    | 987.37  |
|                                                         | H          | 1.7089615332 | 1.1940393492  | 0.2813294398 | 1056.82  | 1071.41   | 1111.97 |
|                                                         | H          | 1.4450966087 | 0.0805870461  | 3.1292017248 | 1140.84  | 1178.25   | 1213.01 |
|                                                         | H          | 1.8992885654 | -0.9695867448 | 1.7898409453 | 1249.10  | 1276.48   | 1300.65 |

|                                                                           |   |               |               |               |            |           |            |
|---------------------------------------------------------------------------|---|---------------|---------------|---------------|------------|-----------|------------|
|                                                                           | H | -0.5681710371 | -0.840637328  | 1.9008434603  | 1342.12    | 1357.57   | 1371.98    |
|                                                                           | H | -0.4989202223 | 0.9264823004  | 1.8516250202  | 1442.09    | 1457.85   | 1477.66    |
|                                                                           | H | -1.0140962526 | 0.0900977571  | -0.394846078  | 1491.07    | 1548.24   | 3013.36    |
|                                                                           | H | 2.0219855866  | 2.1006306148  | 1.8331775934  | 3055.69    | 3088.69   | 3107.10    |
|                                                                           | O | 0.7253799832  | 1.0313319319  | -0.5374807566 | 3129.62    | 3147.47   | 3190.23    |
|                                                                           | O | 0.5283974624  | -1.258414381  | -0.3700622598 | 3783.13    |           |            |
|                                                                           | O | 0.4507364626  | -1.3457775757 | -1.7815761809 | ! 164.21   | 394.43    | ! Torsions |
|                                                                           | H | 1.1012034305  | -0.6834424575 | -2.0559770482 |            |           |            |
| QOOH-0 = Performic acid + CH <sub>3</sub> CH <sub>2</sub> CH <sub>2</sub> | C | 0.00351519    | 0.04069615    | 0.02994893    | 440.26i    | 139.13    | 197.27     |
|                                                                           | C | 0.00846726    | -0.0184574    | 1.55378007    | 263.57     | 411.15    | 423.50     |
|                                                                           | C | 1.37611531    | -0.1154029    | 2.14021841    | 490.36     | 710.53    | 766.56     |
|                                                                           | C | 2.41496583    | 1.45571162    | 1.56224275    | 833.68     | 902.53    | 933.76     |
|                                                                           | O | 1.64296244    | 2.39176394    | 1.77330824    | 939.87     | 962.91    | 999.36     |
|                                                                           | O | 3.55269112    | 1.28619261    | 2.32259537    | 1102.40    | 1128.51   | 1149.46    |
|                                                                           | O | 3.37647257    | 1.89376147    | 3.58462164    | 1198.71    | 1285.32   | 1334.19    |
|                                                                           | H | 0.43938622    | 0.9782587     | -0.3150212    | 1375.26    | 1413.86   | 1462.14    |
|                                                                           | H | -1.011293     | -0.0151431    | -0.3594124    | 1473.41    | 1502.76   | 1508.61    |
|                                                                           | H | 0.57334187    | -0.786274     | -0.3970951    | 1518.71    | 1595.83   | 3020.68    |
|                                                                           | H | -0.4981659    | 0.85337614    | 1.96607727    | 3044.57    | 3061.87   | 3111.89    |
|                                                                           | H | -0.5523325    | -0.8999909    | 1.8886089     | 3120.29    | 3135.57   | 3146.24    |
|                                                                           | H | 1.48497854    | 0.06219092    | 3.20435941    | 3215.56    | 3658.25   |            |
|                                                                           | H | 2.02496564    | -0.8967403    | 1.7551121     | ! 75.5532  | 95.7507   |            |
|                                                                           | H | 2.62868328    | 1.05035795    | 0.56500106    | 280.7205   | 345.1318  |            |
|                                                                           | H | 2.76751086    | 2.62474736    | 3.36889814    | !Torsions  |           |            |
| QOOH-0 = QOOH-3                                                           | O | 0.51945611    | 0.37023462    | 0.18926944    | 1634.98i   | 100.88    | 152.33     |
|                                                                           | C | 0.03761453    | 0.02380025    | 1.44665508    | 269.22     | 385.45    | 425.51     |
|                                                                           | O | 1.0930949     | -0.2191272    | 2.3518218     | 599.45     | 616.05    | 773.52     |
|                                                                           | O | 1.82804164    | -1.3210638    | 1.84876096    | 797.83     | 850.66    | 915.24     |
|                                                                           | C | -0.7076166    | 1.24431821    | 1.96922532    | 993.23     | 995.57    | 1035.97    |
|                                                                           | C | 0.03287518    | 2.39876951    | 1.28671469    | 1074.10    | 1104.33   | 1141.78    |
|                                                                           | H | -0.6073406    | 3.11901652    | 0.78237381    | 1171.08    | 1214.26   | 1257.45    |
|                                                                           | C | 1.16793198    | 3.02184486    | 2.05271176    | 1320.55    | 1330.76   | 1365.01    |
|                                                                           | H | 0.49964858    | 1.69349501    | 0.3745359     | 1372.76    | 1410.25   | 1438.95    |
|                                                                           | H | -0.5487485    | -0.8929725    | 1.33824818    | 1479.56    | 1488.22   | 1497.46    |
|                                                                           | H | 2.25058568    | -0.935358     | 1.06770386    | 1792.23    | 3042.13   | 3070.40    |
|                                                                           | H | -1.7438474    | 1.19846088    | 1.64135574    | 3096.45    | 3116.81   | 3128.04    |
|                                                                           | H | -0.6854078    | 1.29925581    | 3.05742617    | 3150.47    | 3158.07   | 3780.72    |
|                                                                           | H | 0.76683359    | 3.58836601    | 2.89896519    | ! 178.85   | 223.88    | 363.23     |
|                                                                           | H | 1.83375211    | 2.25753428    | 2.44991198    | !Torsions  |           |            |
|                                                                           | H | 1.74123913    | 3.71128734    | 1.43497497    |            |           |            |
| QOOH-0 = HO <sub>2</sub> + Butraldehyde                                   | O | 0.05888996    | -9.565E-05    | -0.01441      | 767.98i    | 52.68     | 247.36     |
|                                                                           | O | -0.0080097    | -0.0090371    | 2.22939884    | 287.75     | 304.76    | 369.84     |
|                                                                           | O | 1.32136373    | 0.01112815    | 2.49997722    | 415.74     | 494.37    | 591.03     |
|                                                                           | C | -0.3480131    | 0.87857224    | 0.80678085    | 780.61     | 867.75    | 914.45     |
|                                                                           | C | 0.38762852    | 2.18792425    | 0.94511466    | 953.89     | 983.27    | 1075.29    |
|                                                                           | C | -0.025469     | 3.14718857    | -0.1738863    | 1091.19    | 1158.52   | 1200.06    |
|                                                                           | C | 0.41408457    | 2.68336646    | -1.5572582    | 1238.98    | 1281.74   | 1349.82    |
|                                                                           | H | 1.4974515     | 2.5644661     | -1.59655      | 1362.16    | 1376.14   | 1422.27    |
|                                                                           | H | 0.12414082    | 3.40459591    | -2.3203845    | 1440.00    | 1473.93   | 1477.19    |
|                                                                           | H | -0.0285837    | 1.72054905    | -1.8129608    | 1493.72    | 1502.76   | 1509.75    |
|                                                                           | H | 0.40679131    | 4.12543013    | 0.04084628    | 2996.79    | 3056.13   | 3063.84    |
|                                                                           | H | -1.110265     | 3.28142853    | -0.1524473    | 3078.09    | 3097.32   | 3133.38    |
|                                                                           | H | 1.45747016    | 1.9858502     | 0.90157433    | 3139.20    | 3140.00   | 3785.83    |
|                                                                           | H | 0.14687083    | 2.61259008    | 1.9206935     | ! 114.0272 | 130.6512  |            |
|                                                                           | H | -1.4303733    | 0.95237481    | 0.99367894    | 190.9324   | !Torsions |            |

|                                     |   |            |            |            |           |           |         |
|-------------------------------------|---|------------|------------|------------|-----------|-----------|---------|
|                                     | H | 1.60962845 | -0.8842058 | 2.27271847 |           |           |         |
| QOOH-2 = OH + 3-ethyloxiran-2-ol    | O | -0.0276121 | 0.00176286 | 0.00960008 | 912.08i   | 148.59    | 217.63  |
|                                     | C | 0.00739563 | -0.0626291 | 1.39138799 | 243.49    | 293.96    | 350.85  |
|                                     | C | 1.35504012 | -0.0772199 | 1.98081549 | 426.13    | 428.74    | 569.47  |
|                                     | H | 1.44812241 | -0.4566903 | 2.9887123  | 667.92    | 723.09    | 792.20  |
|                                     | C | 2.53343107 | 0.49762094 | 1.29750005 | 879.02    | 978.46    | 999.72  |
|                                     | C | 3.27900504 | 1.51123775 | 2.16595791 | 1039.07   | 1065.30   | 1099.49 |
|                                     | O | -0.1163229 | 1.16381485 | 2.01107392 | 1167.54   | 1222.50   | 1262.87 |
|                                     | O | -1.6642465 | 1.71431072 | 1.51727814 | 1280.99   | 1311.88   | 1358.59 |
|                                     | H | -0.8259651 | 0.50671461 | -0.1945617 | 1409.24   | 1430.75   | 1469.54 |
|                                     | H | -0.7017588 | -0.7937072 | 1.78816977 | 1488.42   | 1502.09   | 1510.76 |
|                                     | H | 3.2080535  | -0.3304286 | 1.04673183 | 3021.64   | 3065.2124 |         |
|                                     | H | 2.21564299 | 0.93942868 | 0.35527235 | 3067.5605 | 3128.7973 |         |
|                                     | H | 3.60252295 | 1.05990895 | 3.10419794 | 3146.1021 | 3150.7622 |         |
|                                     | H | 4.16056157 | 1.88738138 | 1.64939754 | 3217.1963 | 3809.5406 |         |
|                                     | H | 2.62753839 | 2.35118693 | 2.4018222  | 3854.8755 |           |         |
|                                     | H | -1.400936  | 2.64115789 | 1.46517792 | ! 50.99   | 102.93    | 190.90  |
|                                     |   |            |            | !Torsions  |           |           |         |
| QOOH-3 = Propene + OH + Formic Acid | O | -0.1007384 | -0.1671138 | 0.07358496 | 1283.03i  | 57.30     | 76.50   |
|                                     | C | 0.0010331  | 0.13445004 | 1.4010542  | 194.49    | 238.53    | 243.06  |
|                                     | O | 1.13284525 | -0.0877904 | 1.97592066 | 345.97    | 390.36    | 428.30  |
|                                     | O | 1.25886227 | -1.758209  | 2.19242289 | 503.85    | 612.37    | 692.86  |
|                                     | C | -0.079748  | 2.05181591 | 1.51442533 | 894.43    | 917.67    | 955.52  |
|                                     | C | -0.4253214 | 2.45415146 | 2.79765625 | 1017.01   | 1043.29   | 1049.70 |
|                                     | H | 0.3616944  | 2.67069416 | 3.50907156 | 1103.34   | 1172.80   | 1200.96 |
|                                     | C | -1.8191667 | 2.39974487 | 3.31230047 | 1258.88   | 1304.05   | 1334.73 |
|                                     | H | 0.79750018 | -0.2710349 | -0.2629328 | 1398.87   | 1426.13   | 1457.65 |
|                                     | H | -0.9188136 | -0.133947  | 1.91692637 | 1475.63   | 1492.06   | 1546.66 |
|                                     | H | 1.5713298  | -1.6882267 | 3.10278648 | 3024.19   | 3085.96   | 3127.51 |
|                                     | H | 0.91563023 | 2.28000539 | 1.15409886 | 3130.64   | 3132.93   | 3188.51 |
|                                     | H | -0.8514381 | 2.10038728 | 0.75240817 | 3221.75   | 3839.76   | 3854.11 |
|                                     | H | -2.0755165 | 3.30293339 | 3.86920253 | ! 111.96  | 128.97    | 139.42  |
|                                     | H | -2.5385194 | 2.27666781 | 2.50320998 | !Torsions |           |         |
|                                     | H | -1.9465325 | 1.56270288 | 4.00829681 |           |           |         |

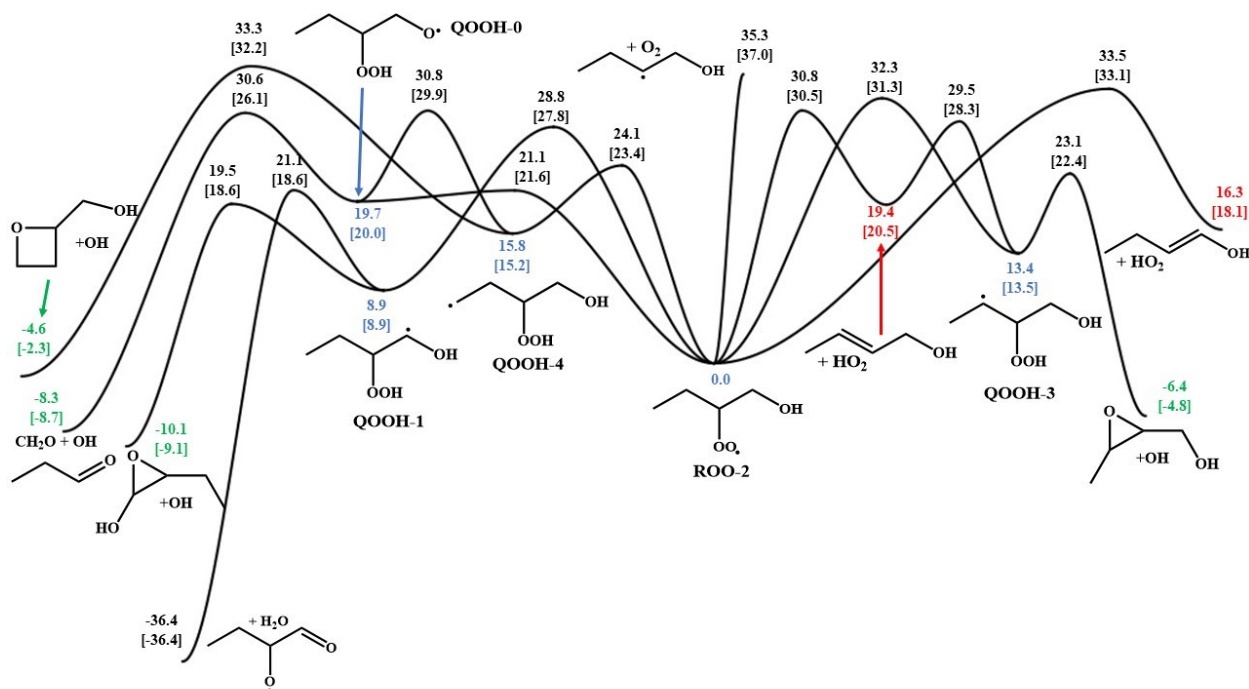

**Figure S3.** Potential energy surface for n-Butanol ROO<sub>2</sub> calculated at CCSD(T)/cc-pV $\infty$ Z//M06-2X/cc-pVTZ level of theory. Energies are given in kcal/mol. QOOH energies are given in blue, HO<sub>2</sub> producing routes in red, OH producing rates in green.

**Table S3.** Calculated relative energies for n-Butanol ROO<sub>2</sub> PES

| Species                                               | Relative energy (kcal/mol) |
|-------------------------------------------------------|----------------------------|
| n-Butanol ROO <sub>2</sub>                            | 0.0                        |
| QOOH-0                                                | 19.7                       |
| QOOH-1                                                | 8.9                        |
| QOOH-3                                                | 13.4                       |
| QOOH-4                                                | 15.2                       |
| HO <sub>2</sub> + 1-Buten-1-ol                        | 16.3                       |
| HO <sub>2</sub> + 2-Buten-1-ol                        | 19.4                       |
| O <sub>2</sub> + CH <sub>3</sub> CH <sub>2</sub> CHOH | 35.3                       |
| CH <sub>2</sub> O + OH + propanal                     | -8.3                       |
| OH + 3-ethyloxiran-2-ol                               | -10.1                      |
| OH + (3-methyloxiran-2-yl)methanol                    | -6.4                       |
| H <sub>2</sub> O + C <sub>4</sub> H <sub>7</sub> O-2O | -36.4                      |
| OH + 2-Oxetanemethanol                                | -1.6                       |
| nbutanol-ROO <sub>2</sub> = QOOH-0                    | 21.1                       |
| nbutanol-ROO <sub>2</sub> = QOOH-1                    | 28.8                       |
| nbutanol-ROO <sub>2</sub> = QOOH-3                    | 32.3                       |
| nbutanol-ROO <sub>2</sub> = QOOH-4                    | 24.1                       |



|                                                                |      |
|----------------------------------------------------------------|------|
| nbutanol-ROO2 = HO <sub>2</sub> + 1-Buten-1-ol                 | 33.5 |
| nbutanol-ROO2 = HO <sub>2</sub> + 2-Buten-1-ol                 | 30.8 |
| QOOH-0 = CH <sub>2</sub> O + OH + propanal                     | 30.6 |
| QOOH-0 = QOOH4                                                 | 30.8 |
| QOOH-1 = OH + 3-ethyloxiran-2-ol                               | 19.4 |
| QOOH-1 = H <sub>2</sub> O + C <sub>4</sub> H <sub>7</sub> O-2O | 21.1 |
| QOOH-3 = HO <sub>2</sub> + 2-Buten-1-ol                        | 29.5 |
| QOOH-3 = OH + (3-methyloxiran-2-yl)methanol                    | 23.1 |
| QOOH-4 = OH + 2-Oxetanemethanol                                | 36.2 |

**Table S4.** Optimized geometries and frequencies (m062x/cc-pVTZ) of relevant stationary points on the calculated n-Butanol ROO2 PES

| Species                                                                                             | Geometry   |            |            | Frequencies (cm <sup>-1</sup> ) |         |           |         |
|-----------------------------------------------------------------------------------------------------|------------|------------|------------|---------------------------------|---------|-----------|---------|
| n-Butanol ROO2<br>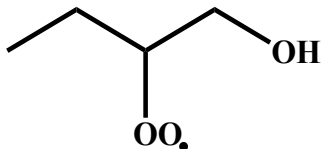 | C          | 0.00414919 | 0.00039887 | -0.0063532                      | 203.81  | 276.18    | 389.42  |
|                                                                                                     | C          | -0.0109508 | 0.00764199 | 1.51318833                      | 442.79  | 462.16    | 568.03  |
|                                                                                                     | O          | 1.26887165 | 0.00992274 | 2.0899559                       | 766.96  | 865.67    | 936.55  |
|                                                                                                     | H          | 1.78046719 | 0.70891454 | 1.66878779                      | 987.76  | 1039.61   | 1106.81 |
|                                                                                                     | O          | 0.31252996 | 1.34129474 | -0.4870088                      | 1137.34 | 1144.57   | 1177.07 |
|                                                                                                     | O          | 1.50300129 | 1.73142785 | -0.1515957                      | 1241.43 | 1275.12   | 1305.12 |
|                                                                                                     | H          | -0.5083835 | -0.9017293 | 1.85191068                      | 1309.36 | 1357.00   | 1395.95 |
|                                                                                                     | H          | -0.6121841 | 0.86281382 | 1.84595797                      | 1407.35 | 1420.94   | 1450.08 |
|                                                                                                     | H          | 0.80548265 | -0.6473991 | -0.3680143                      | 1480.93 | 1503.96   | 1506.62 |
|                                                                                                     | C          | -1.3339156 | -0.3537085 | -0.6216271                      | 1512.17 | 3024.51   | 3066.06 |
|                                                                                                     | C          | -1.3054069 | -0.362323  | -2.1450752                      | 3072.01 | 3090.05   | 3106.23 |
|                                                                                                     | H          | -2.0827033 | 0.35332231 | -0.2567543                      | 3116.72 | 3141.98   | 3154.96 |
|                                                                                                     | H          | -1.6161182 | -1.3375999 | -0.2444141                      | 3841.31 |           |         |
|                                                                                                     | H          | -2.2772128 | -0.6405759 | -2.5487635                      | ! 63.78 | 92.35     | 149.39  |
| H                                                                                                   | -1.0440195 | 0.61913591 | -2.5364848 | 223.85                          | 418.89  | !Torsions |         |
| H                                                                                                   | -0.5701531 | -1.078781  | -2.512897  |                                 |         |           |         |
| QOOH-0<br>       | C          | 0.02515031 | 0.01467505 | 0.0233738                       | 230.71  | 288.16    | 365.45  |
|                                                                                                     | C          | 0.00045171 | -0.0272433 | 1.54600252                      | 382.88  | 487.86    | 539.85  |
|                                                                                                     | C          | 1.40127358 | -0.0174218 | 2.13294998                      | 773.55  | 793.88    | 810.70  |
|                                                                                                     | O          | 1.95175722 | 1.2451521  | 1.8759065                       | 943.83  | 984.36    | 1054.70 |
|                                                                                                     | O          | 3.3594867  | 1.16313329 | 1.98066816                      | 1071.51 | 1098.18   | 1154.53 |
|                                                                                                     | C          | 1.33524642 | -0.2584677 | 3.68839487                      | 1189.34 | 1241.40   | 1281.50 |
|                                                                                                     | O          | 2.59704006 | -0.1752249 | 4.165195                        | 1293.38 | 1312.61   | 1371.96 |
|                                                                                                     | H          | 0.54924866 | 0.9021098  | -0.325705                       | 1391.71 | 1416.05   | 1459.07 |
|                                                                                                     | H          | -0.9866688 | 0.03135768 | -0.3783362                      | 1481.84 | 1501.96   | 1511.51 |
|                                                                                                     | H          | 0.53402282 | -0.8607874 | -0.3805991                      | 1523.99 | 2993.24   | 3054.94 |
|                                                                                                     | H          | -0.5411864 | 0.83351355 | 1.94285122                      | 3070.35 | 3073.46   | 3092.23 |
|                                                                                                     | H          | -0.5136383 | -0.9231203 | 1.89673088                      | 3115.77 | 3141.59   | 3157.24 |
|                                                                                                     | H          | 2.03642635 | -0.7838888 | 1.68946685                      | 3704.39 |           |         |
|                                                                                                     | H          | 0.69099967 | 0.53914939 | 4.07844154                      | ! 89.91 | 132.87    | 158.54  |
| H                                                                                                   | 0.88613193 | -1.2474948 | 3.84002657 | 215.34                          | 413.09  | !Torsions |         |
| H                                                                                                   | 3.48980385 | 1.16244545 | 2.94408323 |                                 |         |           |         |
| QOOH-1<br>       | O          | -0.002582  | -0.006918  | 0.00055695                      | 278.87  | 290.74    | 314.20  |
|                                                                                                     | C          | -6.882E-05 | -0.0004697 | 1.35669363                      | 441.61  | 492.35    | 570.58  |
|                                                                                                     | C          | 1.28068215 | -0.0006635 | 2.09969217                      | 744.47  | 814.85    | 864.50  |
|                                                                                                     | C          | 1.12002229 | 0.46673159 | 3.53714197                      | 919.89  | 982.61    | 1047.91 |
|                                                                                                     | C          | 2.43165089 | 0.48727772 | 4.31126457                      | 1052.49 | 1066.15   | 1144.40 |

|                                                                                                                          |                                                                                                                                                                                                                                                                                                                                                                                                                                                                                                                                                                                                                                                                                              |                                                                                                                                                                                                                                                                                                                                                                                                                                                     |
|--------------------------------------------------------------------------------------------------------------------------|----------------------------------------------------------------------------------------------------------------------------------------------------------------------------------------------------------------------------------------------------------------------------------------------------------------------------------------------------------------------------------------------------------------------------------------------------------------------------------------------------------------------------------------------------------------------------------------------------------------------------------------------------------------------------------------------|-----------------------------------------------------------------------------------------------------------------------------------------------------------------------------------------------------------------------------------------------------------------------------------------------------------------------------------------------------------------------------------------------------------------------------------------------------|
| 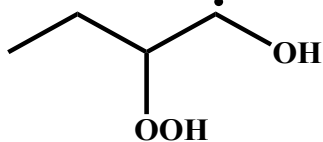                                        | <p>O 1.8604389 -1.3173887 2.19662692</p> <p>O 2.05414783 -1.7953549 0.87054315</p> <p>H 2.86121343 -0.5099067 4.37732624</p> <p>H 2.27675413 0.86307535 5.32151077</p> <p>H 3.15950537 1.13362709 3.81930942</p> <p>H 0.39604313 -0.1877300 4.02743954</p> <p>H 0.68166626 1.46529452 3.50720725</p> <p>H 2.018706 0.6239563 1.57587519</p> <p>H 1.35811015 -2.4616755 0.80723928</p> <p>H 0.85576866 -0.3310543 -0.2975655</p> <p>H -0.9343143 0.3073257 1.79874251</p>                                                                                                                                                                                                                     | <p>1201.63 1234.52 1296.63</p> <p>1335.55 1362.90 1388.97</p> <p>1405.53 1412.01 1461.09</p> <p>1486.12 1500.19 1509.52</p> <p>3001.93 3059.54 3068.27</p> <p>3108.77 3129.27 3157.83</p> <p>3205.03 3810.84 3875.46</p> <p>!71.06 92.63 155.32 231.70</p> <p>241.76 349.37 !Torsions</p>                                                                                                                                                           |
| <p>QOOH-3</p>                           | <p>C -0.0012412 -0.0007304 -0.0001854</p> <p>C -0.0006018 0.00339384 1.48559919</p> <p>C 1.28593876 -0.000727 2.23048201</p> <p>O 2.06608824 1.17856759 1.94912333</p> <p>O 1.38652275 2.31172299 2.47873745</p> <p>C 1.12443433 -0.2243142 3.72800479</p> <p>O 0.09955346 0.547305 4.31071664</p> <p>H 0.85230782 0.5542085 -0.3945259</p> <p>H -0.9158943 0.42666027 -0.4094349</p> <p>H 0.07661777 -1.0215377 -0.3957374</p> <p>H 0.8247436 2.57941776 1.73960021</p> <p>H -0.9199387 -0.0998591 2.04193892</p> <p>H 1.95998909 -0.7730101 1.83655623</p> <p>H 0.29616524 1.46777188 4.11062724</p> <p>H 0.85798607 -1.2688219 3.89521383</p> <p>H 2.09070081 -0.0370635 4.20692174</p>   | <p>211.07 284.09 327.94</p> <p>388.96 423.03 573.45</p> <p>750.96 813.53 926.02</p> <p>965.28 985.18 1016.19</p> <p>1055.21 1118.33 1149.67</p> <p>1169.68 1250.89 1274.93</p> <p>1343.32 1385.33 1393.17</p> <p>1409.52 1428.71 1446.21</p> <p>1484.97 1490.21 1498.78</p> <p>3006.38 3021.35 3044.74</p> <p>3082.41 3108.12 3132.58</p> <p>3227.24 3806.45 3863.48</p> <p>! 75.77 96.89 118.96</p> <p>178.91 255.61 506.02</p> <p>!Torsions</p>   |
| <p>QOOH-4</p>                         | <p>C -0.0455713 0.08588109 0.02491216</p> <p>C -0.0202544 -0.0012351 1.50727771</p> <p>H 0.86364244 0.27728827 -0.5242852</p> <p>H -0.9187504 -0.2259744 -0.5290989</p> <p>C -1.4135157 -0.020828 2.12806889</p> <p>H 0.49832953 -0.9107542 1.83943441</p> <p>H 0.55366183 0.82272453 1.93633647</p> <p>C -1.3953021 0.16483606 3.63907218</p> <p>H -1.909573 -0.9695645 1.90326055</p> <p>H -2.4316956 0.22087915 3.98660613</p> <p>H -0.9318718 -0.7114171 4.09586201</p> <p>O -0.6490828 1.28205433 4.06580397</p> <p>H -0.976339 2.04831689 3.58372884</p> <p>O -2.2947726 0.90891541 1.49668006</p> <p>O -1.7370618 2.21415097 1.59559275</p> <p>H -1.2437289 2.28126406 0.76500203</p> | <p>234.35 286.96 347.56</p> <p>422.79 506.87 547.38</p> <p>703.50 797.78 888.76</p> <p>932.24 976.84 1002.49</p> <p>1065.14 1106.02 1132.79</p> <p>1175.97 1220.98 1253.42</p> <p>1293.67 1378.23 1380.70</p> <p>1404.59 1414.13 1444.11</p> <p>1467.43 1471.92 1503.41</p> <p>3004.20 3042.00 3071.51</p> <p>3088.59 3103.00 3171.11</p> <p>3275.30 3770.62 3859.27</p> <p>! 113.75 123.51 168.23</p> <p>188.00 377.34 461.13</p> <p>!Torsions</p> |
| <p>HO<sub>2</sub> + 1-Buten-1-ol</p>  | <p>O 0.5055325 2.59512924 1.6402416</p> <p>O -0.1679742 2.44348437 0.5078306</p> <p>H -0.2367003 1.48037439 0.3500898</p> <p>C 0.01129837 0.00358214 0.01477432</p> <p>C -0.0023248 0.00030064 1.54312544</p> <p>C 1.37787198 -0.0043674 2.12660705</p> <p>C 1.85338103 0.96644322 2.89334186</p> <p>O 3.09505924 1.0376972 3.44299897</p> <p>H 0.510588 0.89612038 -0.3616015</p> <p>H -0.999943 -0.0228673 -0.3905654</p>                                                                                                                                                                                                                                                                  | <p>1161.48 1475.38 3553.10</p> <p>198.80 325.75 451.54</p> <p>541.11 783.76 852.60</p> <p>922.85 985.48 1034.78</p> <p>1097.01 1136.87 1162.38</p> <p>1252.01 1300.65 1339.99</p> <p>1353.79 1409.41 1411.50</p> <p>1487.78 1500.77 1509.73</p> <p>1768.36 3051.37 3060.79</p>                                                                                                                                                                      |

|                                                                                     |   |            |            |             |                        |           |           |
|-------------------------------------------------------------------------------------|---|------------|------------|-------------|------------------------|-----------|-----------|
|                                                                                     | H | 0.54933961 | -0.864491  | -0.3683461  | 3091.05                | 3131.01   | 3138.61   |
|                                                                                     | H | -0.5441111 | 0.87381188 | 1.91078899  | 3143.67                | 3204.04   | 3864.71 ! |
|                                                                                     | H | -0.5535529 | -0.8764444 | 1.89279238  | 103.57                 | 215.79    | 410.66    |
|                                                                                     | H | 2.01981761 | -0.8478365 | 1.88197194  | !Torsions              |           |           |
|                                                                                     | H | 1.25930771 | 1.83093605 | 3.16325846  |                        |           |           |
|                                                                                     | H | 3.59834683 | 0.25830996 | 3.18883928  |                        |           |           |
| HO <sub>2</sub> + 2-Buten-1-ol                                                      | O | 0.5055325  | 2.59512924 | 1.6402416   | 1161.48                | 1475.38   | 3553.10   |
| 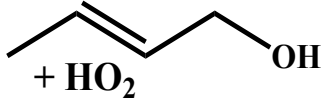   | O | -0.1679742 | 2.44348437 | 0.5078306   |                        |           |           |
|                                                                                     | H | -0.2367003 | 1.48037439 | 0.3500898   |                        |           |           |
|                                                                                     | C | 0.00110526 | 0.00256459 | -0.0011716  | 203.37                 | 217.75    | 385.57    |
|                                                                                     | C | 0.00066903 | 0.01365029 | 1.49481965  | 664.25                 | 761.91    | 886.05    |
|                                                                                     | C | 1.08837957 | -0.0155826 | 2.25011467  | 992.44                 | 1004.80   | 1024.36   |
|                                                                                     | C | 1.09180759 | 0.00119467 | 3.75055544  | 1079.05                | 1127.29   | 1159.84   |
|                                                                                     | O | -0.1766844 | 0.20950003 | 4.32881862  | 1218.06                | 1309.76   | 1331.97   |
|                                                                                     | H | -0.5095386 | 1.0554586  | 4.01701157  | 1381.01                | 1411.88   | 1423.68   |
|                                                                                     | H | -0.495219  | 0.88895076 | -0.4003137  | 1484.34                | 1497.31   | 1505.71   |
|                                                                                     | H | -0.5430353 | -0.8629292 | -0.3832872  | 1773.11                | 3015.55   | 3055.25   |
|                                                                                     | H | 1.01553917 | -0.0287349 | -0.3963188  | 3082.49                | 3109.05   | 3137.25   |
|                                                                                     | H | -0.9681528 | 0.02977415 | 1.98429173  | 3157.34                | 3172.01   | 3871.48   |
|                                                                                     | H | 2.06800524 | -0.0534041 | 1.78101488  | ! 146.92 248.09 333.02 |           |           |
|                                                                                     | H | 1.81085974 | 0.75185766 | 4.10035097  | !Torsions              |           |           |
|                                                                                     | H | 1.44131754 | -0.9616869 | 4.1293429   |                        |           |           |
| O <sub>2</sub> + CH <sub>3</sub> CH <sub>2</sub> CHCH <sub>2</sub> OH               | O | 0.0000000  | 0.0000000  | 0.00794919  | 1758.25                |           |           |
|   | O | 0.0000000  | 0.0000000  | 1.19781253  |                        |           |           |
|                                                                                     | C | -0.0015825 | 0.01326112 | 0.01257112  | 219.96                 | 338.55    | 423.36    |
|                                                                                     | C | 0.00034886 | -0.0115301 | 1.53850701  | 571.99                 | 776.65    | 854.61    |
|                                                                                     | C | 1.37035089 | -0.0340186 | 2.11798744  | 961.22                 | 1004.33   | 1044.34   |
|                                                                                     | C | 1.61174357 | -0.5898045 | 3.47632502  | 1067.63                | 1131.85   | 1162.92   |
|                                                                                     | O | 1.13199109 | -1.9235058 | 3.61561782  | 1213.38                | 1271.72   | 1312.65   |
|                                                                                     | H | 0.54397346 | 0.88098158 | -0.3604318  | 1368.77                | 1410.95   | 1412.39   |
|                                                                                     | H | 0.48029449 | -0.8788017 | -0.3879407  | 1429.46                | 1478.28   | 1502.71   |
|                                                                                     | H | -0.5384147 | 0.87167593 | 1.91113659  | 1505.02                | 1507.35   | 2983.10   |
|                                                                                     | H | -0.5568254 | -0.8747611 | 1.90833609  | 3022.07                | 3060.92   | 3061.61   |
|                                                                                     | H | 2.14707552 | 0.5534704  | 1.64448467  | 3083.67                | 3129.16   | 3138.57   |
|                                                                                     | H | 2.67346261 | -0.529658  | 3.73168497  | 3186.48                | 3865.89   |           |
|                                                                                     | H | 1.06375403 | -0.0196742 | 4.23517961  | ! 39.15 96.86 248.28   |           |           |
|                                                                                     | H | 1.52424115 | -2.4474306 | 2.91160524  | 310.65                 | !Torsions |           |
|                                                                                     | H | -1.0156616 | 0.05855007 | -0.3822163  |                        |           |           |
| CH <sub>2</sub> O + OH + propanal                                                   | O | 0.00000000 | 0.00000000 | -0.00571069 | 3776.00                |           |           |
|  | H | 0.00000000 | 0.00000000 | 0.96571069  |                        |           |           |
|                                                                                     | O | 1.75214387 | -0.7145028 | 0.73740505  | 1218.60                | 1279.77   | 1546.46   |
|                                                                                     | C | 1.58204252 | -0.4681554 | -0.4198612  | 1877.08                | 2943.66   | 3014.59   |
|                                                                                     | H | 1.92664152 | 0.47856444 | -0.870535   |                        |           |           |
|                                                                                     | H | 1.07176408 | -1.1748522 | -1.0968368  |                        |           |           |
|                                                                                     | C | -0.0088334 | 0.00308834 | 0.00021537  | 266.82                 | 673.44    | 677.86    |
|                                                                                     | C | -0.0031765 | 0.0007975  | 1.48572907  | 873.63                 | 908.86    | 1008.52   |
|                                                                                     | C | 1.4220078  | -0.0026989 | 2.02869628  | 1121.87                | 1156.86   | 1283.93   |
|                                                                                     | O | -1.2572665 | -0.1552681 | -0.5283629  | 1372.83                | 1414.21   | 1430.39   |
|                                                                                     | O | -1.1755897 | -0.1115346 | -1.9431467  | 1457.55                | 1497.45   | 1504.73   |
|                                                                                     | H | -0.5449389 | 0.8748294  | 1.86892114  | 1866.92                | 2945.02   | 3050.32   |
|                                                                                     | H | -0.5497278 | -0.8754972 | 1.84187402  | 3077.74                | 3081.28   | 3153.86   |

|                                                                                     |   |               |               |               |           |          |           |
|-------------------------------------------------------------------------------------|---|---------------|---------------|---------------|-----------|----------|-----------|
|                                                                                     | H | 1.42405644    | 0.00808997    | 3.117032      | 3156.87   | ! 148.66 | 238.11    |
|                                                                                     | H | 1.96099697    | -0.8880251    | 1.6929931     | !Torsions |          |           |
|                                                                                     | H | 1.96977516    | 0.87446604    | 1.6833002     |           |          |           |
|                                                                                     | H | -1.0570379    | -1.0450961    | -2.1614852    |           |          |           |
|                                                                                     | H | 0.65665443    | 0.63494383    | -0.5771534    |           |          |           |
| OH + 3-ethyloxiran-2-ol                                                             | O | 0.00000000    | 0.00000000    | -0.00571069   | 3776.00   |          |           |
| 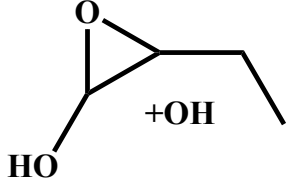   | H | 0.00000000    | 0.00000000    | 0.96571069    |           |          |           |
|                                                                                     | C | -0.0048656182 | 0.0052648361  | -0.0066756637 | 168.34    | 342.75   | 372.63    |
|                                                                                     | C | 0.002279904   | 0.0089069374  | 1.4542068967  | 500.79    | 584.58   | 770.58    |
|                                                                                     | O | 1.2174921893  | 0.0181235329  | 0.7573723213  | 850.82    | 929.21   | 968.18    |
|                                                                                     | H | -0.1903033837 | -0.9505528595 | -0.4932385375 | 1030.65   | 1071.38  | 1125.08   |
|                                                                                     | C | -0.2593001393 | 1.2262351708  | -0.8407644511 | 1140.89   | 1158.60  | 1189.61   |
|                                                                                     | C | 0.6986887382  | 1.2959666262  | -2.0253585486 | 1290.53   | 1300.74  | 1316.17   |
|                                                                                     | H | -0.1401241053 | 2.1090528744  | -0.2101407447 | 1349.14   | 1413.27  | 1420.67   |
|                                                                                     | H | -1.2953249713 | 1.2091370732  | -1.1852754197 | 1479.71   | 1503.13  | 1510.34   |
|                                                                                     | H | 0.5336526123  | 2.1961493629  | -2.6150941313 | 1543.38   | 3064.26  | 3067.38   |
|                                                                                     | H | 1.7299090662  | 1.2997996172  | -1.6738585087 | 3102.17   | 3120.26  | 3137.47   |
|                                                                                     | H | 0.5690261093  | 0.4345911019  | -2.6817017176 | 3146.96   | 3180.00  | 3864.59   |
|                                                                                     | O | -0.2726337925 | -1.09454965   | 2.2246888182  | ! 92.07   | 213.70   | 246.40    |
|                                                                                     | H | 0.080091419   | -1.8712621422 | 1.7788761453  | !Torsions |          |           |
|                                                                                     | H | -0.2375900616 | 0.9137106846  | 2.0005081352  |           |          |           |
| OH + (3-methyloxiran-2-yl)methanol                                                  | O | 0.00000000    | 0.00000000    | -0.00571069   | 3776.00   |          |           |
|   | H | 0.00000000    | 0.00000000    | 0.96571069    |           |          |           |
|                                                                                     | C | -0.0249967    | -0.0096645    | 0.00557249    | 216.98    | 252.48   | 345.91    |
|                                                                                     | C | 0.02036494    | -0.0109615    | 1.46669032    | 487.45    | 661.03   | 810.18    |
|                                                                                     | O | 1.2204231     | -0.0527622    | 0.69066332    | 849.03    | 928.33   | 990.13    |
|                                                                                     | H | -0.2921184    | -0.9348947    | -0.4976453    | 1043.17   | 1061.80  | 1120.59   |
|                                                                                     | H | -0.1345916    | 0.94404806    | 1.95743573    | 1156.40   | 1178.21  | 1191.96   |
|                                                                                     | C | -0.2506700    | 1.25480857    | -0.7855856    | 1236.18   | 1295.03  | 1352.51   |
|                                                                                     | H | -1.3181558    | 1.40124612    | -0.9530579    | 1383.43   | 1416.82  | 1437.97   |
|                                                                                     | H | 0.23056504    | 1.14840617    | -1.7646988    | 1481.56   | 1498.30  | 1513.48   |
|                                                                                     | O | 0.23144785    | 2.38691919    | -0.1054971    | 1542.00   | 3025.36  | 3068.00   |
|                                                                                     | H | 1.12125414    | 2.17003775    | 0.19537663    | 3108.80   | 3138.49  | 3142.99   |
|                                                                                     | C | -0.282753     | -1.2391095    | 2.27009872    | 3144.84   | 3166.51  | 3836.21   |
|                                                                                     | H | 0.34283428    | -1.2760561    | 3.16164578    | ! 139.24  | 195.56   | 432.82 !  |
|                                                                                     | H | -1.3258835    | -1.2390351    | 2.58640753    | Torsions  |          |           |
|                                                                                     | H | -0.0933594    | -2.1339043    | 1.67888819    |           |          |           |
| H <sub>2</sub> O + C <sub>4</sub> H <sub>7</sub> O-2O                               | O | 0.0000000     | 0.0000000     | 0.0000000     | 1627.56   | 3874.01  | 3976.38   |
|  | H | 0.0000000     | 0.0000000     | 0.95889274    |           |          |           |
|                                                                                     | H | 0.92689607    | 0.0000000     | -0.2456399    |           |          |           |
|                                                                                     | C | 0.01673954    | 0.00849452    | 0.00519858    | 195.17    | 301.77   | 424.03    |
|                                                                                     | C | -0.0060448    | 0.01793886    | 1.52658674    | 452.05    | 624.65   | 776.61    |
|                                                                                     | H | 1.02296171    | 0.03766019    | 1.88485081    | 783.88    | 842.12   | 964.82    |
|                                                                                     | C | 0.91155131    | 1.09016937    | -0.6215018    | 1009.56   | 1063.42  | 1108.40   |
|                                                                                     | O | 1.72905502    | 1.70338992    | -0.0053043    | 1122.74   | 1188.85  | 1258.04   |
|                                                                                     | H | 0.72312133    | 1.25226796    | -1.6979873    | 1306.11   | 1355.96  | 1387.11   |
|                                                                                     | C | -0.7663696    | -1.1765753    | 2.08247933    | 1417.19   | 1486.24  | 1503.61   |
|                                                                                     | H | -0.8229522    | -1.1332364    | 3.16859132    | 1512.04   | 1874.89  | 2874.99   |
|                                                                                     | H | -1.7812291    | -1.2014535    | 1.68803477    | 2975.91   | 3064.35  | 3081.31   |
|                                                                                     | H | 0.48426576    | -0.9337066    | -0.3571317    | 3120.59   | 3138.31  | 3150.94 ! |
|                                                                                     | H | -0.2758252    | -2.112597     | 1.81012312    | 78.62     | 125.20   | 234.48    |
|                                                                                     | O | -1.1998539    | 0.03248776    | -0.6015606    | !Torsions |          |           |

|                                                                                   |   |            |            |             |                           |
|-----------------------------------------------------------------------------------|---|------------|------------|-------------|---------------------------|
|                                                                                   | H | -0.4667365 | 0.95360642 | 1.8480206   |                           |
| OH + 2-Oxetanemethanol                                                            | O | 0.00000000 | 0.00000000 | -0.00571069 | 3776.00                   |
| 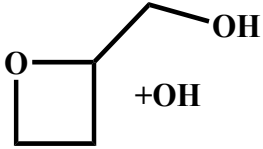 | H | 0.00000000 | 0.00000000 | 0.96571069  |                           |
|                                                                                   | O | 0.01729099 | 0.09418816 | 0.03889921  | 73.95 235.30 391.41       |
|                                                                                   | C | 0.01294046 | 0.05392339 | 1.44599647  | 507.01 778.44 786.72      |
|                                                                                   | C | 1.42289723 | -0.058538  | 1.97348474  | 891.81 920.57 984.23      |
|                                                                                   | O | 2.1944882  | 1.07727223 | 1.52470555  | 1022.86 1074.63 1098.29   |
|                                                                                   | C | 1.62799283 | 0.32220045 | 3.4451704   | 1133.85 1158.50 1185.74   |
|                                                                                   | C | 2.32085759 | 1.56696057 | 2.871867    | 1217.49 1235.81 1265.62   |
|                                                                                   | H | 3.36513036 | 1.70583709 | 3.14963112  | 1300.40 1343.39 1371.83   |
|                                                                                   | H | 1.78088468 | 2.50458691 | 3.01131355  | 1397.73 1444.51 1495.77   |
|                                                                                   | H | 0.6484262  | 0.77688137 | -0.2141286  | 1505.15 1540.55 3009.12   |
|                                                                                   | H | -0.4546666 | 0.95342704 | 1.86760298  | 3067.71 3085.35 3107.16   |
|                                                                                   | H | -0.5770104 | -0.8119478 | 1.75022915  | 3112.68 3116.91 3172.50   |
|                                                                                   | H | 1.88114855 | -0.990674  | 1.63902836  | 3842.64                   |
|                                                                                   | H | 0.71620687 | 0.49872574 | 4.01113018  | ! 135.48 442.69 !Torsions |
|                                                                                   | H | 2.28238865 | -0.3428488 | 3.9997329   |                           |
| nbutanol-ROO2 = QOOH-0                                                            | C | 0.00994688 | 0.00772352 | 0.01948832  | 1183.70i 150.47 195.06    |
|                                                                                   | C | 0.00278297 | -0.0088118 | 1.54415913  | 306.09 369.34 456.40      |
|                                                                                   | C | 1.4008015  | -0.001596  | 2.11599225  | 515.03 549.74 674.93      |
|                                                                                   | O | 1.97967107 | 1.23737352 | 1.90080381  | 747.20 777.11 897.39      |
|                                                                                   | O | 3.30825587 | 1.16814857 | 2.24973842  | 944.48 965.80 1006.79     |
|                                                                                   | C | 1.39325964 | -0.1899622 | 3.72018332  | 1089.73 1103.13 1165.43   |
|                                                                                   | O | 2.62667843 | 0.03248468 | 4.19116809  | 1186.03 1229.20 1244.08   |
|                                                                                   | H | 0.51745655 | 0.89660626 | -0.3513416  | 1269.35 1306.10 1314.03   |
|                                                                                   | H | -1.006175  | 0.00504656 | -0.3708355  | 1360.43 1409.01 1416.94   |
|                                                                                   | H | 0.52610682 | -0.8668731 | -0.3767032  | 1481.60 1502.77 1510.14   |
|                                                                                   | H | -0.5323844 | 0.85803384 | 1.93487273  | 1515.76 1844.18 2979.86   |
|                                                                                   | H | -0.5082568 | -0.8984373 | 1.91543832  | 3046.56 3070.81 3076.06   |
|                                                                                   | H | 2.04598819 | -0.7880051 | 1.71867877  | 3087.44 3117.07 3143.97   |
|                                                                                   | H | 0.63354934 | 0.5026477  | 4.10244845  | 3154.01                   |
|                                                                                   | H | 1.07589268 | -1.2353133 | 3.8391094   | ! 85.22 223.83 !Torsions  |
|                                                                                   | H | 3.22604303 | 0.73866895 | 3.25022422  |                           |
| nbutanol-ROO2 = QOOH-1                                                            | H | 0.01097354 | -0.0104299 | -0.0174892  | 2042.57i 140.94 183.46    |
|                                                                                   | O | 0.0380693  | -0.0208266 | 1.27029283  | 278.70 304.57 474.12      |
|                                                                                   | O | 1.43061638 | 0.00303633 | 1.31607633  | 511.74 572.85 671.41      |
|                                                                                   | C | 1.82156182 | -0.8026898 | 0.22354493  | 776.89 890.80 977.46      |
|                                                                                   | H | 1.52464785 | -1.8457063 | 0.41103062  | 980.83 1020.29 1053.88    |
|                                                                                   | C | 0.94246899 | -0.256955  | -0.9057753  | 1095.39 1152.17 1170.68   |
|                                                                                   | H | 1.24721741 | 0.71238687 | -1.2972592  | 1206.20 1244.62 1278.68   |
|                                                                                   | O | 0.61945354 | -1.0954069 | -1.929855   | 1299.91 1340.71 1364.99   |
|                                                                                   | H | 0.42543668 | -1.972101  | -1.5806121  | 1406.99 1415.19 1444.89   |
|                                                                                   | C | 3.31502186 | -0.6880143 | 0.01425012  | 1481.12 1502.27 1510.00   |
|                                                                                   | C | 4.10984703 | -1.2750282 | 1.1751433   | 1791.97 2988.23 3066.17   |
|                                                                                   | H | 3.55871748 | 0.36707617 | -0.1233864  | 3069.76 3107.12 3134.01   |
|                                                                                   | H | 3.55907786 | -1.2006622 | -0.9187232  | 3139.60 3152.78 3843.35   |
|                                                                                   | H | 5.18049557 | -1.1849815 | 0.99987439  | ! 89.33 210.83 409.97 !   |
|                                                                                   | H | 3.86904112 | -0.7587827 | 2.10290036  | Torsions                  |
|                                                                                   | H | 3.87752626 | -2.332238  | 1.30824888  |                           |
| nbutanol-ROO2 = QOOH-3                                                            | C | -0.001553  | 0.00241565 | 0.0005299   | 2169.27i 134.78 225.32    |
|                                                                                   | C | 3.3694E-05 | -0.0006967 | 1.49837104  | 252.67 323.08 373.15      |
|                                                                                   | C | 1.37274431 | -0.0036366 | 2.17148711  | 595.35 621.27 769.77      |
|                                                                                   | O | 1.79530567 | 1.35673139 | 2.04450674  | 821.72 848.65 933.48      |
|                                                                                   | O | 0.65479777 | 2.08946266 | 2.39360384  | 973.51 1012.17 1029.44    |

|                                                |   |            |            |            |           |          |           |
|------------------------------------------------|---|------------|------------|------------|-----------|----------|-----------|
|                                                | C | 1.33077585 | -0.4705436 | 3.61847046 | 1078.86   | 1105.09  | 1119.88   |
|                                                | O | 0.25805062 | 0.06611223 | 4.35542317 | 1170.71   | 1194.47  | 1240.35   |
|                                                | H | 0.70880661 | 0.73564777 | -0.3819901 | 1276.31   | 1345.66  | 1375.66   |
|                                                | H | -0.989056  | 0.21994834 | -0.4023109 | 1402.28   | 1413.20  | 1442.74   |
|                                                | H | 0.29863984 | -0.9814611 | -0.3756775 | 1483.91   | 1490.95  | 1502.79   |
|                                                | H | -0.1475826 | 1.24162015 | 1.90911791 | 1739.10   | 3033.18  | 3038.68   |
|                                                | H | -0.7654569 | -0.5974981 | 1.98505839 | 3073.56   | 3101.12  | 3108.03   |
|                                                | H | 2.11689689 | -0.5852721 | 1.6200449  | 3145.70   | 3165.96  | 3838.65   |
|                                                | H | 0.28374246 | 1.02357196 | 4.25210588 | ! 119.41  | 213.67   | 474.26    |
|                                                | H | 1.20895306 | -1.5551002 | 3.63153197 | !Torsions |          |           |
|                                                | H | 2.29501881 | -0.2332749 | 4.07972522 |           |          |           |
| nbutanol-ROO2 = QOOH-4                         | C | 0.01878856 | -0.0058021 | 0.0150424  | 1819.70i  | 138.93   | 193.27    |
|                                                | C | 0.00916222 | -0.0078217 | 1.51716778 | 265.11    | 405.66   | 414.03    |
|                                                | C | 1.44283581 | 0.00535571 | 2.07470711 | 473.45    | 500.91   | 551.93    |
|                                                | H | 0.10994559 | 0.96492957 | -0.4626804 | 659.87    | 828.35   | 866.08    |
|                                                | H | -0.5119767 | 0.8702543  | 1.90946558 | 931.09    | 1004.95  | 1054.18   |
|                                                | H | -0.491297  | -0.8978941 | 1.89901086 | 1096.63   | 1116.01  | 1118.09   |
|                                                | H | 1.95263999 | 0.93871235 | 1.82162961 | 1131.84   | 1150.20  | 1176.11   |
|                                                | O | 2.14395064 | -1.0692218 | 1.46931319 | 1226.55   | 1262.12  | 1286.43   |
|                                                | O | 2.35770145 | -0.7565159 | 0.13857351 | 1358.98   | 1371.34  | 1396.78   |
|                                                | H | 1.25493711 | -0.5219278 | -0.208353  | 1442.33   | 1454.53  | 1479.35   |
|                                                | H | -0.6661267 | -0.6791204 | -0.4876924 | 1506.26   | 1586.80  | 3032.32   |
|                                                | C | 1.51165355 | -0.2484517 | 3.56490733 | 3049.91   | 3072.37  | 3114.37   |
|                                                | H | 0.92272993 | 0.50678558 | 4.08469922 | 3123.37   | 3125.95  | 3215.00   |
|                                                | H | 1.07005992 | -1.2293722 | 3.77572357 | 3865.68   | ! 112.16 | 374.61    |
|                                                | O | 2.82812288 | -0.1581741 | 4.05160261 | !Torsions |          |           |
|                                                | H | 3.37293928 | -0.7590015 | 3.53423236 |           |          |           |
| nbutanol-ROO2 = HO <sub>2</sub> + 1-Buten-1-ol | H | -0.0036614 | 0.0354777  | 0.03740466 | 1151.01i  | 121.64   | 161.80    |
|                                                | O | 0.00498675 | -0.0162248 | 0.99529826 | 196.63    | 309.77   | 320.47    |
|                                                | C | 1.33023469 | -0.0250713 | 1.44900867 | 517.78    | 546.15   | 568.69    |
|                                                | H | 2.03336073 | 0.82293673 | 0.67906009 | 694.30    | 796.42   | 919.04    |
|                                                | C | 1.6134402  | 0.72037259 | 2.58051205 | 953.98    | 1013.38  | 1020.00   |
|                                                | H | 1.86413888 | -0.9663362 | 1.31609134 | 1082.47   | 1145.23  | 1174.82   |
|                                                | H | 0.82526364 | 1.34272595 | 2.98685604 | 1222.90   | 1267.65  | 1288.99   |
|                                                | O | 2.57366647 | 1.9652575  | 0.46916787 | 1308.45   | 1346.20  | 1365.86   |
|                                                | O | 2.47746422 | 2.38411732 | 1.65029142 | 1405.38   | 1411.02  | 1494.40   |
|                                                | C | 2.77906698 | 0.40553886 | 3.45843009 | 1501.60   | 1513.22  | 1609.96   |
|                                                | C | 2.36993411 | -0.5519656 | 4.5807236  | 1661.65   | 3066.19  | 3070.82   |
|                                                | H | 3.1755905  | 1.32814508 | 3.8814059  | 3105.41   | 3115.33  | 3141.37   |
|                                                | H | 3.57293599 | -0.0419753 | 2.85664614 | 3145.80   | 3199.50  | 3891.82 ! |
|                                                | H | 3.21791549 | -0.7643365 | 5.23010667 | 86.58     | 222.29   | 229.61    |
|                                                | H | 1.57661453 | -0.1195646 | 5.19042459 | !Torsions |          |           |
|                                                | H | 2.00414518 | -1.4941142 | 4.17392057 |           |          |           |
| nbutanol-ROO2 = HO <sub>2</sub> + 2-Buten-1-ol | C | 0.00748144 | -0.0032111 | 0.00522557 | 1061.14i  | 139.62   | 179.47    |
|                                                | C | -0.0169334 | -0.000816  | 1.5210366  | 199.30    | 259.51   | 440.28    |
|                                                | C | 1.15651263 | 0.08090975 | 2.25517124 | 449.24    | 524.65   | 533.45    |
|                                                | O | 1.03137651 | 2.09743773 | 2.84098076 | 701.20    | 829.10   | 916.28    |
|                                                | O | -0.1060666 | 2.39306311 | 2.39323234 | 964.26    | 1050.87  | 1058.88   |
|                                                | C | 1.27162232 | -0.4324004 | 3.65518202 | 1092.43   | 1138.37  | 1157.04   |
|                                                | O | 2.33413829 | 0.13949437 | 4.37438764 | 1223.74   | 1274.89  | 1287.12   |
|                                                | H | 0.81203204 | 0.63344892 | -0.3631571 | 1299.76   | 1383.61  | 1401.84   |
|                                                | H | -0.9279725 | 0.37102311 | -0.4078601 | 1421.26   | 1428.28  | 1491.27   |
|                                                | H | 0.16610857 | -1.0071485 | -0.3889948 | 1494.78   | 1508.19  | 1603.32   |
|                                                | H | -0.354236  | 1.23841274 | 1.85829041 | 1635.38   | 3026.94  | 3064.76   |
|                                                | H | -0.8308284 | -0.5516629 | 1.98946087 | 3077.91   | 3121.71  | 3131.51   |

|                                               |   |            |            |            |           |            |               |
|-----------------------------------------------|---|------------|------------|------------|-----------|------------|---------------|
|                                               | H | 2.09789567 | 0.2853099  | 1.75662342 | 3142.23   | 3183.26    | 3873.51       |
|                                               | H | 0.31045588 | -0.3055255 | 4.16716461 | ! 120.00  | 152.81     | 386.42        |
|                                               | H | 1.47373301 | -1.5060067 | 3.60970093 | !Torsions |            |               |
|                                               | H | 2.18842313 | 1.08926975 | 4.41151457 |           |            |               |
| QOOH-0 = CH <sub>2</sub> O + OH +<br>propanal | O | -0.0537264 | 0.02999715 | 0.07688465 | 266.24i   | 113.48     | 162.58        |
|                                               | C | 0.01083562 | -0.006978  | 1.30069532 | 255.98    | 294.88     | 339.54        |
|                                               | C | 2.13026194 | -0.0174697 | 1.76946559 | 423.73    | 566.28     | 647.85        |
|                                               | C | 2.73502899 | 0.83319693 | 0.70663192 | 768.14    | 875.09     | 924.14        |
|                                               | C | 2.2402837  | 2.27708936 | 0.71486137 | 993.10    | 1066.66    | 1090.80       |
|                                               | O | 2.23604764 | 0.52379943 | 3.00804276 | 1122.74   | 1143.26    | 1218.66       |
|                                               | O | 1.78041926 | -0.4369054 | 3.95214512 | 1252.92   | 1295.33    | 1370.60       |
|                                               | H | -0.0875416 | 0.91057349 | 1.90746257 | 1387.57   | 1416.67    | 1441.42       |
|                                               | H | -0.130083  | -0.9478563 | 1.85629482 | 1462.39   | 1493.48    | 1504.16       |
|                                               | H | 2.25891899 | -1.0941776 | 1.74602371 | 1515.51   | 1664.42    | 2932.31       |
|                                               | H | 3.82462097 | 0.80457528 | 0.81649354 | 3001.83   | 3034.93    | 3076.88       |
|                                               | H | 2.48824897 | 0.36005428 | -0.2437842 | 3116.49   | 3151.09    | 3155.36       |
|                                               | H | 2.41347765 | 2.75071061 | 1.68001878 | 3166.49   | 3839.29    |               |
|                                               | H | 2.76370896 | 2.85536492 | -0.0440878 | ! 85.03   | 101.37     | 140.45        |
|                                               | H | 1.1757174  | 2.30833625 | 0.4877695  | 211.20    | ! Torsions |               |
|                                               | H | 1.26974898 | 0.12711229 | 4.54597338 |           |            |               |
| QOOH-0 = QOOH4                                | O | -0.0009855 | 0.00042169 | -0.0050552 | 1640.39i  | 160.40     | 200.15        |
|                                               | C | -0.0088262 | 0.01476347 | 1.38391056 | 267.60    | 401.74     | 406.07        |
|                                               | C | 1.42111414 | 0.00972573 | 1.93609069 | 458.98    | 481.82     | 546.63        |
|                                               | C | 2.1423376  | 1.2565758  | 1.43830312 | 655.20    | 833.51     | 886.30        |
|                                               | C | 2.08006623 | 1.29483598 | -0.067393  | 968.67    | 1004.68    | 1024.51       |
|                                               | O | 1.4405384  | 0.0687546  | 3.34620657 | 1098.37   | 1109.22    | 1121.23       |
|                                               | O | 1.00005685 | -1.1967772 | 3.83007479 | 1167.10   | 1174.90    | 1201.25       |
|                                               | H | -0.5399514 | 0.88337974 | 1.79651089 | 1245.31   | 1257.46    | 1310.81       |
|                                               | H | -0.5115413 | -0.8991465 | 1.71729749 | 1325.05   | 1372.74    | 1390.12       |
|                                               | H | 1.93533503 | -0.895168  | 1.59955045 | 1407.24   | 1462.99    | 1487.13       |
|                                               | H | 1.6542246  | 2.13019312 | 1.8732029  | 1502.33   | 1553.55    | 2996.64       |
|                                               | H | 3.173475   | 1.23921549 | 1.79825021 | 3055.43   | 3062.53    | 3069.46       |
|                                               | H | 0.96468512 | 0.75052569 | -0.3115588 | 3110.58   | 3119.04    | 3199.04       |
|                                               | H | 2.03959897 | 2.28099881 | -0.518736  | 3840.24   |            |               |
|                                               | H | 2.7835879  | 0.63623988 | -0.5695926 | ! 106.42  | 170.03     | !Torsions     |
|                                               | H | 0.22362754 | -0.9430074 | 4.34235484 |           |            |               |
| QOOH-1 = OH + 3-<br>ethyloxiran-2-ol          | H | 0.06988136 | -0.0442517 | -0.013343  | 859.58i   | 115.92     | 153.66 231.08 |
|                                               | O | 0.07675271 | -0.031355  | 0.95100057 | 276.37    | 301.87     | 448.34        |
|                                               | O | 1.80001686 | 0.01567789 | 1.06255721 | 501.86    | 530.65     | 723.96        |
|                                               | C | 2.10461454 | 0.95125267 | 2.04363203 | 791.92    | 907.69     | 965.12        |
|                                               | H | 1.70778534 | 0.66576573 | 3.02828674 | 982.43    | 1059.49    | 1111.44       |
|                                               | H | 4.11896677 | 0.99203378 | 1.08357114 | 1148.13   | 1172.87    | 1245.66       |
|                                               | C | 3.50429792 | 0.55859679 | 1.85706374 | 1253.05   | 1299.63    | 1331.00       |
|                                               | O | 4.08301984 | -0.4296349 | 2.52798962 | 1359.64   | 1412.85    | 1415.48       |
|                                               | H | 3.46332019 | -0.8008313 | 3.16742113 | 1496.53   | 1504.17    | 1511.41       |
|                                               | C | 1.75564636 | 2.38368504 | 1.70228438 | 1538.98   | 3000.41    | 3059.46       |
|                                               | C | 2.20830971 | 3.35352038 | 2.78509626 | 3071.31   | 3116.06    | 3138.98       |
|                                               | H | 0.67665688 | 2.42274121 | 1.55919045 | 3143.65   | 3251.80    | 3834.90       |
|                                               | H | 2.21641172 | 2.62592551 | 0.74176573 | 3859.27   |            |               |
|                                               | H | 1.95142783 | 4.37915272 | 2.52654333 | ! 87.45   | 136.27     | 189.16        |
|                                               | H | 1.73291692 | 3.12272547 | 3.73933994 | 403.42    | !Torsions  |               |
|                                               | H | 3.28897269 | 3.30680985 | 2.93124401 |           |            |               |
| QOOH-1 = H <sub>2</sub> O +<br>C4H7O-2O       | C | -0.0034204 | 0.00716075 | 0.00069117 | 1685.87i  | 148.73     | 149.58        |
|                                               | C | -0.0184066 | -0.0067565 | 1.5290771  | 266.46    | 295.45     | 333.81        |
|                                               | H | 1.03143066 | 0.01781943 | -0.3488384 | 391.88    | 420.31     | 505.07        |

|                                                     |   |            |            |            |           |         |            |
|-----------------------------------------------------|---|------------|------------|------------|-----------|---------|------------|
|                                                     | H | -0.4629412 | 0.94737003 | -0.3069235 | 630.83    | 727.76  | 799.85     |
|                                                     | C | 0.92429461 | 0.97120184 | 2.12851732 | 838.33    | 897.38  | 952.33     |
|                                                     | H | 0.36032033 | -0.984935  | 1.89198081 | 993.91    | 1033.65 | 1062.05    |
|                                                     | H | 1.98244794 | 0.92815757 | 1.90283895 | 1113.30   | 1150.38 | 1202.50    |
|                                                     | O | 0.58363576 | 1.7087304  | 3.14940714 | 1250.21   | 1269.10 | 1311.62    |
|                                                     | H | -0.4077998 | 1.81266505 | 3.08682208 | 1362.85   | 1395.03 | 1413.15    |
|                                                     | O | -1.2596307 | 0.01677719 | 2.08992751 | 1475.31   | 1499.74 | 1508.82    |
|                                                     | O | -1.6829569 | 1.68453259 | 2.05177261 | 1551.21   | 2927.69 | 2960.76    |
|                                                     | H | -2.5865775 | 1.51498049 | 2.33605789 | 3064.79   | 3067.77 | 3112.72    |
|                                                     | C | -0.7615228 | -1.1779608 | -0.5774309 | 3136.78   | 3151.85 | 3214.37    |
|                                                     | H | -1.7774646 | -1.2001126 | -0.1864536 | 3886.33   |         |            |
|                                                     | H | -0.8124428 | -1.1184881 | -1.6633343 | !         | 86.04   | 227.00     |
|                                                     | H | -0.2781621 | -2.1200807 | -0.31356   | !Torsions |         |            |
| QOOH-3 = HO <sub>2</sub> + 2-<br>Buten-1-ol         | C | 0.01575077 | 0.01406454 | 0.00938249 | 594.58i   | 139.42  | 204.55     |
|                                                     | C | -0.0002503 | -0.0450457 | 1.37476775 | 228.78    | 285.02  | 349.19     |
|                                                     | H | 0.98095331 | 0.04096169 | -0.4829141 | 394.37    | 679.06  | 767.30     |
|                                                     | C | 1.22959593 | -0.3659149 | 2.18188152 | 878.97    | 937.62  | 964.61     |
|                                                     | H | -0.9473167 | -0.2269421 | 1.87226064 | 1000.29   | 1036.35 | 1085.25    |
|                                                     | H | 1.13655436 | 0.10851079 | 3.16251635 | 1130.35   | 1160.72 | 1230.51    |
|                                                     | H | 1.27823911 | -1.4454733 | 2.33951102 | 1287.56   | 1300.89 | 1389.05    |
|                                                     | O | 2.42508718 | 0.00759066 | 1.53937472 | 1401.95   | 1414.36 | 1435.31    |
|                                                     | H | 2.42328645 | 0.97038785 | 1.50705666 | 1475.49   | 1485.61 | 1500.45    |
|                                                     | O | -0.1948777 | 1.85676242 | 1.81112056 | 1595.34   | 3044.02 | 3051.47    |
|                                                     | O | 1.0003006  | 2.51542595 | 1.59420535 | 3092.28   | 3092.73 | 3141.44    |
|                                                     | H | 0.85570135 | 2.98008898 | 0.76059027 | 3169.42   | 3189.97 | 3802.24    |
|                                                     | C | -1.2069568 | 0.15659492 | -0.8251827 | 3842.49   |         |            |
|                                                     | H | -1.206284  | 1.11175374 | -1.3572267 | !         | 68.49   | 124.35     |
|                                                     | H | -1.2524071 | -0.6228745 | -1.5890269 | 439.10    | 527.51  | ! Torsions |
|                                                     | H | -2.1107993 | 0.10709582 | -0.2205602 |           |         |            |
| QOOH-3 = OH + (3-<br>methyloxiran-2-<br>yl)methanol | C | 0.01942739 | 0.02006753 | 0.0128315  | 903.32i   | 90.03   | 173.92     |
|                                                     | C | 0.00984493 | -0.0258782 | 1.48174581 | 222.97    | 272.95  | 353.00     |
|                                                     | H | 0.98408245 | 3.3403E-05 | -0.4749996 | 401.84    | 472.90  | 538.62     |
|                                                     | C | 1.18223628 | -0.6896175 | 2.16924929 | 709.54    | 881.51  | 920.48     |
|                                                     | H | -0.9423748 | -0.3222131 | 1.92946675 | 993.02    | 1011.31 | 1074.68    |
|                                                     | H | 1.16166509 | -1.761376  | 1.96214707 | 1112.10   | 1143.21 | 1155.70    |
|                                                     | H | 2.10521613 | -0.2755053 | 1.74240452 | 1202.28   | 1256.16 | 1263.36    |
|                                                     | O | 1.12715032 | -0.5259392 | 3.56148621 | 1339.99   | 1389.00 | 1410.28    |
|                                                     | H | 0.94880286 | 0.41226094 | 3.71734766 | 1454.26   | 1470.36 | 1481.84    |
|                                                     | O | 0.1263543  | 1.36592555 | 1.36523941 | 1501.33   | 1505.08 | 3011.14    |
|                                                     | O | 0.20409846 | 2.03630644 | 2.92647772 | 3033.40   | 3074.23 | 3096.48    |
|                                                     | H | 0.80424057 | 2.74798226 | 2.67338475 | 3105.88   | 3154.27 | 3214.78    |
|                                                     | C | -1.2133633 | 0.15960831 | -0.7920251 | 3753.18   | 3857.53 |            |
|                                                     | H | -1.0948274 | 0.89521201 | -1.5871481 | !         | 94.6938 | 148.94     |
|                                                     | H | -1.4566754 | -0.7952401 | -1.2710047 | 633.04    | !       | Torisons   |
|                                                     | H | -2.0538673 | 0.44753758 | -0.1637191 |           |         |            |
| QOOH-4 = OH + 2-<br>Oxetanemethanol                 | O | -0.0003891 | -0.0067862 | 0.0167562  | 1082.34i  | 72.58   | 187.36     |
|                                                     | C | 0.011674   | 0.01835499 | 1.41911223 | 197.80    | 266.58  | 305.17     |
|                                                     | C | 1.39753868 | -0.005025  | 2.02959053 | 363.53    | 445.95  | 482.77     |
|                                                     | O | 2.01497231 | 1.30416568 | 2.13382616 | 581.67    | 621.10  | 809.88     |
|                                                     | O | 1.83131148 | 1.94331977 | 0.62017095 | 853.98    | 876.91  | 938.43     |
|                                                     | C | 1.42537804 | -0.3178958 | 3.52097047 | 1061.82   | 1066.60 | 1095.66    |
|                                                     | C | 2.47032675 | 0.67955194 | 3.9186947  | 1113.42   | 1143.43 | 1155.28    |
|                                                     | H | 3.5131369  | 0.42052515 | 3.81301997 | 1232.46   | 1246.51 | 1277.97    |
|                                                     | H | 2.23935531 | 1.49345849 | 4.58702694 | 1341.74   | 1348.76 | 1415.01    |
|                                                     | H | 0.55314793 | 0.73122025 | -0.2645626 | 1458.18   | 1473.20 | 1492.63    |



|  |   |            |            |            |         |         |                  |
|--|---|------------|------------|------------|---------|---------|------------------|
|  | H | -0.516817  | 0.89104867 | 1.82376289 | 1498.57 | 3017.99 | 3066.67          |
|  | H | -0.5147437 | -0.8783302 | 1.75514673 | 3079.51 | 3088.27 | 3132.26          |
|  | H | 2.04950573 | -0.657259  | 1.44255527 | 3178.69 | 3284.65 | 3820.41          |
|  | H | 2.76664672 | 2.10762496 | 0.45832806 | 3872.62 |         |                  |
|  | H | 0.46405563 | -0.0802816 | 3.97568305 | !       | 153.22  | 557.03 !Torisons |
|  | H | 1.67882344 | -1.353506  | 3.74541777 |         |         |                  |

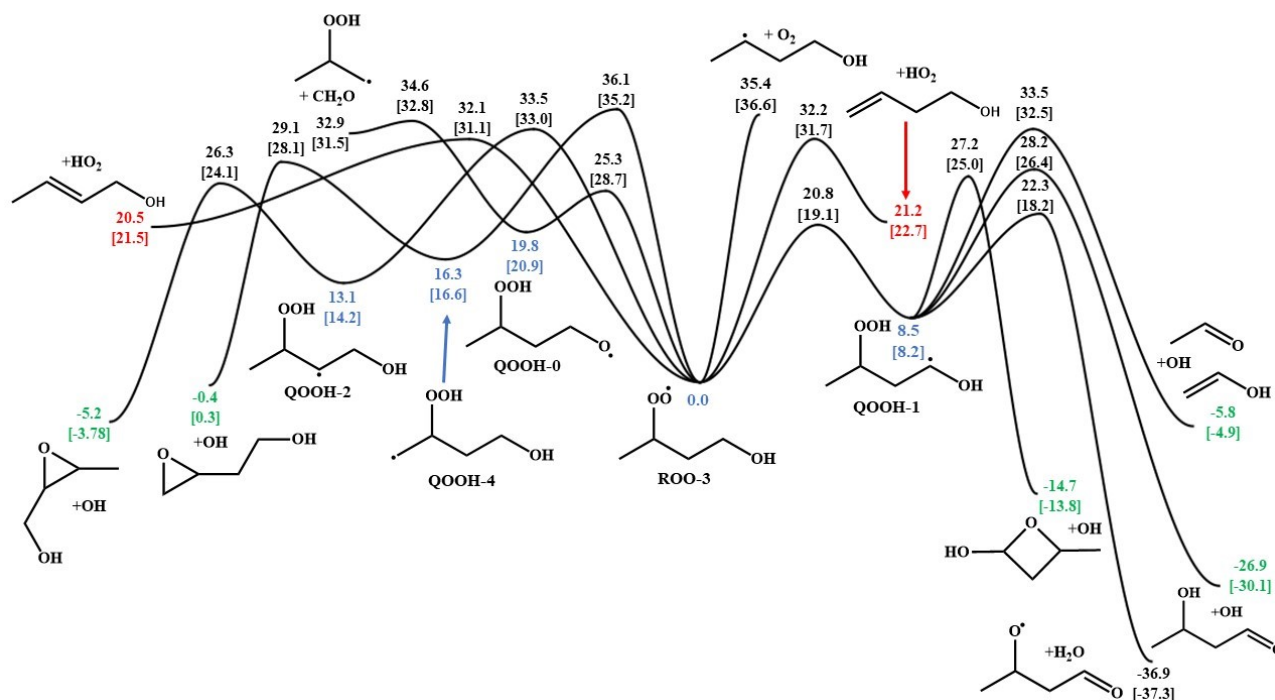

**Figure S4.** Potential energy surface for n-Butanol ROO3 calculated at CCSD(T)/cc-pV $\infty$ Z//M06-2X/cc-pVTZ level of theory. Energies are given in kcal/mol. QOOH energies are given in blue, HO<sub>2</sub> producing routes in red, OH producing rates in green.

**Table S5.** Calculated relative energies for n-Butanol ROO3 PES

| Species                                                               | Relative energy (kcal/mol) |
|-----------------------------------------------------------------------|----------------------------|
| n-Butanol-ROO3                                                        | 0.0                        |
| QOOH-0                                                                | 19.8                       |
| QOOH-1                                                                | 8.5                        |
| QOOH-2                                                                | 13.1                       |
| QOOH-4                                                                | 16.3                       |
| HO <sub>2</sub> + 2-Buten-1-ol                                        | 20.5                       |
| HO <sub>2</sub> + 3-Buten-1-ol                                        | 21.2                       |
| O <sub>2</sub> + CH <sub>3</sub> CHCH <sub>2</sub> CH <sub>2</sub> OH | 35.4                       |
| CH <sub>2</sub> O + 1-methylethyl                                     | 32.9                       |

|                                                                    |       |
|--------------------------------------------------------------------|-------|
| 2-hydroperoxypropane                                               |       |
| H <sub>2</sub> O + C4Y1-3OR                                        | -36.9 |
| acetaldehyde + vinyl alcohol + OH                                  | -5.8  |
| OH + 3-Hydroxybutanal                                              | -26.9 |
| OH + C <sub>4</sub> H <sub>7</sub> OH CYO1-3                       | -14.7 |
| OH + (3-methyloxiran-2-yl)methanol                                 | -5.2  |
| OH + Oxiraneethanol                                                | -0.4  |
| nbutanol-ROO3 = QOOH-0                                             | 25.3  |
| nbutanol-ROO3 = QOOH-1                                             | 20.8  |
| nbutanol-ROO3 = QOOH-2                                             | 33.5  |
| nbutanol-ROO3 = QOOH-4                                             | 36.1  |
| nbutanol-ROO3 = HO <sub>2</sub> + 2-Buten-1-ol                     | 32.1  |
| nbutanol-ROO3 = HO <sub>2</sub> + 3-Buten-1-ol                     | 32.2  |
| QOOH-0 = CH <sub>2</sub> O + 1-methylethyl<br>2-hydroperoxypropane | 34.6  |
| QOOH-1 = H <sub>2</sub> O + C4Y1-3OR                               | 22.3  |
| QOOH-1 = acetaldehyde + vinyl + OH                                 | 33.5  |
| QOOH-1 = OH + 3-Hydroxybutanal                                     | 28.2  |
| QOOH-1 = OH + C <sub>4</sub> H <sub>7</sub> OH CYO1-3              | 27.2  |
| QOOH-2 = OH + (3-methyloxiran-2-yl)methanol                        | 26.3  |
| QOOH-4 = OH + Oxiraneethanol                                       | 29.1  |

**Table S6.** Optimized geometries and frequencies (m062x/cc-pVTZ) of relevant stationary points on the calculated n-Butanol ROO3 PES

| Species                                                                                               | Geometry   |            |            | Frequencies (cm <sup>-1</sup> ) |         |         |         |
|-------------------------------------------------------------------------------------------------------|------------|------------|------------|---------------------------------|---------|---------|---------|
| 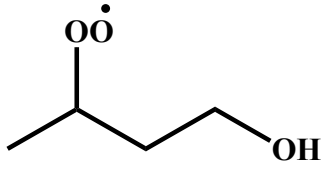<br>n-Butanol-ROO3 | C          | -0.0027869 | 0.00175127 | 0.00131322                      | 243.06  | 314.38  | 346.36  |
|                                                                                                       | C          | 0.00607111 | 0.00121713 | 1.51278024                      | 426.48  | 520.15  | 588.71  |
|                                                                                                       | C          | 1.40425682 | -0.0027727 | 2.10760087                      | 791.65  | 870.10  | 887.54  |
|                                                                                                       | C          | 1.43052341 | 0.10851296 | 3.62835285                      | 986.91  | 1001.51 | 1098.07 |
|                                                                                                       | O          | 0.628446   | -0.873044  | 4.24973224                      | 1119.66 | 1156.85 | 1170.54 |
|                                                                                                       | O          | -0.6905465 | 1.21724529 | 1.91547463                      | 1223.58 | 1273.69 | 1312.15 |
|                                                                                                       | O          | -1.2327505 | 1.11290061 | 3.08872128                      | 1336.31 | 1375.36 | 1400.24 |
|                                                                                                       | H          | 0.51519381 | 0.88159328 | -0.3797204                      | 1412.77 | 1419.61 | 1423.24 |
|                                                                                                       | H          | -1.0209304 | 0.00021662 | -0.3826888                      | 1466.81 | 1490.98 | 1504.40 |
|                                                                                                       | H          | 0.51093683 | -0.885517  | -0.3652701                      | 1519.83 | 3058.34 | 3060.21 |
|                                                                                                       | H          | -0.5797459 | -0.8228425 | 1.91827489                      | 3075.09 | 3103.29 | 3114.66 |
|                                                                                                       | H          | 1.87043347 | -0.9442397 | 1.80901277                      | 3119.78 | 3153.06 | 3159.14 |
|                                                                                                       | H          | 1.98706437 | 0.81066795 | 1.66789442                      | 3858.25 | !108.03 | 150.10  |
|                                                                                                       | H          | 2.45087896 | -0.0460864 | 3.97808279                      | 177.16  | 215.94  | 495.47  |
| H                                                                                                     | 1.12763945 | 1.11244778 | 3.93689349 | !Torsions                       |         |         |         |
| H                                                                                                     | -0.2798701 | -0.5558906 | 4.21848952 |                                 |         |         |         |
| QOOH-0                                                                                                | C          | 0.02618606 | 0.0040594  | 0.01427711                      | 259.47  | 293.35  | 356.73  |
|                                                                                                       | C          | -0.0048392 | 0.00606076 | 1.53117297                      | 443.14  | 523.35  | 575.76  |
|                                                                                                       | C          | 1.38395707 | 0.00196174 | 2.17440524                      | 763.86  | 835.76  | 891.81  |
|                                                                                                       | C          | 2.10658736 | 1.33161065 | 2.01891322                      | 932.70  | 974.17  | 1040.09 |
|                                                                                                       | O          | 1.56407941 | 2.36421183 | 2.74226294                      | 1067.65 | 1082.95 | 1110.01 |
|                                                                                                       | O          | -0.7274812 | 1.17836228 | 1.87486805                      | 1183.20 | 1210.77 | 1244.61 |

|                                                                                                                        |                                                                                                                                                                                                                                                                                                                                                                                                                                                                                                                                                                                                                                                                                             |                                                                                                                                                                                                                                                                                                                                                                                                                                                     |
|------------------------------------------------------------------------------------------------------------------------|---------------------------------------------------------------------------------------------------------------------------------------------------------------------------------------------------------------------------------------------------------------------------------------------------------------------------------------------------------------------------------------------------------------------------------------------------------------------------------------------------------------------------------------------------------------------------------------------------------------------------------------------------------------------------------------------|-----------------------------------------------------------------------------------------------------------------------------------------------------------------------------------------------------------------------------------------------------------------------------------------------------------------------------------------------------------------------------------------------------------------------------------------------------|
| 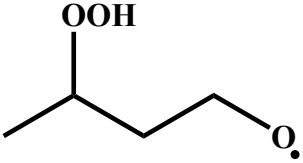 <p>OOH</p>                           | <p>O -0.9327153 1.18060141 3.27913033</p> <p>H 0.54632601 0.88118285 -0.369283</p> <p>H -0.988512 0.01556666 -0.3782889</p> <p>H 0.53229784 -0.8898445 -0.3474604</p> <p>H -0.5632476 -0.8614744 1.89329054</p> <p>H 1.29221449 -0.2168052 3.23842077</p> <p>H 1.97855041 -0.7964888 1.72623281</p> <p>H 3.13920679 1.2476154 2.40064686</p> <p>H 2.22224897 1.64196867 0.97210617</p> <p>H -0.2051862 1.75555166 3.5647213</p>                                                                                                                                                                                                                                                             | <p>1342.04 1370.04 1378.13</p> <p>1384.37 1402.60 1421.14</p> <p>1454.49 1475.57 1489.02</p> <p>1508.87 2952.22 3019.27</p> <p>3056.05 3075.50 3080.55</p> <p>3124.97 3149.87 3157.23</p> <p>3739.39 ! 84.36 168.51</p> <p>199.33 212.69 513.16</p> <p>!Torsions</p>                                                                                                                                                                                |
|  <p>QOOH-1</p> <p>OOH</p> <p>OH</p>   | <p>C 0.00785346 -0.0081115 0.0220848</p> <p>C 0.01359971 -0.0045546 1.53649552</p> <p>H 1.02436871 0.01138624 -0.3669753</p> <p>H -0.5013015 -0.8980758 -0.350258</p> <p>H -0.5125576 0.87237831 -0.3534537</p> <p>C -1.3836945 -0.1252594 2.14113328</p> <p>H 0.50852575 0.88849653 1.9253358</p> <p>C -1.4201165 0.02960668 3.62276517</p> <p>H -2.0108562 0.64417412 1.69040448</p> <p>H -1.794405 -1.0971499 1.82666255</p> <p>H -2.2943358 0.43893269 4.10700907</p> <p>O -0.7546063 -0.8590169 4.40568107</p> <p>H -0.0198547 -1.2249466 3.89539481</p> <p>O 0.7182908 -1.1445711 2.04702875</p> <p>O 2.10371041 -0.9671082 1.79128152</p> <p>H 2.26827683 -1.6503586 1.13050941</p>  | <p>274.10 293.48 334.22</p> <p>443.75 482.87 491.56</p> <p>660.12 838.90 897.67</p> <p>918.65 1004.30 1057.12</p> <p>1098.54 1121.50 1148.29</p> <p>1225.48 1253.56 1314.46</p> <p>1372.81 1377.67 1392.52</p> <p>1411.06 1416.19 1448.27</p> <p>1470.90 1490.68 1506.25</p> <p>2973.24 3065.79 3075.03</p> <p>3116.12 3142.33 3150.94</p> <p>3216.87 3783.52 3834.30</p> <p>! 76.98 118.04 173.19</p> <p>219.16 255.09 597.13</p> <p>!Torsions</p> |
|  <p>QOOH-2</p> <p>OOH</p> <p>OH</p> | <p>C -0.0151654 -0.0343884 -0.0004101</p> <p>C 0.00901618 0.0207445 1.52400098</p> <p>C 1.40550886 0.02165539 2.0594821</p> <p>C 2.13861588 1.29862332 2.26142557</p> <p>O 1.83127434 1.91522736 3.52911248</p> <p>O -0.6748136 1.21959616 1.85269078</p> <p>O -0.8941581 1.23781355 3.25537691</p> <p>H 0.46574635 -0.9473105 -0.3474262</p> <p>H 0.51950642 0.82069784 -0.4139506</p> <p>H -1.0434445 -0.0118348 -0.3573644</p> <p>H -0.5500848 -0.8242102 1.93588901</p> <p>H -0.0857963 1.68209758 3.56561869</p> <p>H 1.88371759 -0.9221244 2.28325647</p> <p>H 3.21700092 1.15116438 2.18348955</p> <p>H 1.83443415 2.0375253 1.52076281</p> <p>H 2.1380941 1.32646881 4.22513093</p> | <p>249.61 261.39 306.31</p> <p>333.08 508.50 574.55</p> <p>657.42 822.34 913.60</p> <p>981.68 1001.58 1018.62</p> <p>1057.17 1095.04 1105.47</p> <p>1208.39 1213.47 1319.60</p> <p>1353.16 1384.19 1385.76</p> <p>1402.03 1419.56 1485.47</p> <p>1499.09 1503.53 1513.44</p> <p>3054.23 3069.75 3070.82</p> <p>3125.70 3147.31 3156.38</p> <p>3205.42 3675.78 3863.74</p> <p>!77.69 152.93 217.45</p> <p>225.17 364.19 611.52</p> <p>!Torsions</p>  |
|  <p>QOOH-4</p> <p>OOH</p> <p>OH</p> | <p>C -0.0037974 0.00167056 0.00620164</p> <p>C -0.0010668 -0.0055718 1.48840117</p> <p>C 1.40560038 -0.0013005 2.07992852</p> <p>C 1.43175981 -0.1009935 3.59752774</p> <p>O 0.9601115 -1.3544824 4.07907169</p> <p>O -0.7954949 -1.0834974 2.00353013</p> <p>O -0.1820585 -2.3114158 1.63576861</p> <p>H 0.42528606 -2.4508396 2.38168776</p> <p>H -0.9161058 -0.2300575 -0.5203912</p> <p>H 0.89108014 0.2259038 -0.5528241</p> <p>H -0.5553809 0.85855714 1.88243702</p> <p>H 1.98093619 -0.8236169 1.65013071</p> <p>H 1.89559853 0.92583395 1.77410595</p>                                                                                                                             | <p>245.20 278.99 376.63</p> <p>417.40 447.22 550.62</p> <p>657.05 808.53 907.40</p> <p>918.34 959.63 1006.32</p> <p>1064.20 1102.84 1131.76</p> <p>1149.22 1223.89 1265.10</p> <p>1310.07 1352.71 1398.48</p> <p>1412.31 1421.84 1457.91</p> <p>1471.64 1478.47 1513.15</p> <p>2996.17 3041.00 3070.06</p> <p>3114.03 3121.56 3180.20</p> <p>3292.92 3706.94 3855.34</p> <p>! 103.06 103.44 174.38</p>                                              |

|                                                                                                                                                                                    |   |            |            |            |                   |         |         |
|------------------------------------------------------------------------------------------------------------------------------------------------------------------------------------|---|------------|------------|------------|-------------------|---------|---------|
|                                                                                                                                                                                    | H | 2.45637643 | -0.0060055 | 3.95372724 | 214.12            | 481.20  | 610.86  |
|                                                                                                                                                                                    | H | 0.85181363 | 0.71539751 | 4.03992566 | !Torsion          |         |         |
|                                                                                                                                                                                    | H | -0.0016683 | -1.3234741 | 4.05967541 |                   |         |         |
| HO <sub>2</sub> + 2-Buten-1-ol<br>+HO <sub>2</sub><br>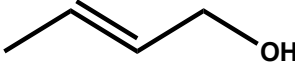                                            | O | 0.5055325  | 2.59512924 | 1.6402416  | 1161.48           | 1475.38 | 3553.10 |
|                                                                                                                                                                                    | O | -0.1679742 | 2.44348437 | 0.5078306  |                   |         |         |
|                                                                                                                                                                                    | H | -0.2367003 | 1.48037439 | 0.3500898  |                   |         |         |
|                                                                                                                                                                                    | C | 0.00110526 | 0.00256459 | -0.0011716 | 203.37            | 217.75  | 385.57  |
|                                                                                                                                                                                    | C | 0.00066903 | 0.01365029 | 1.49481965 | 664.25            | 761.91  | 886.05  |
|                                                                                                                                                                                    | C | 1.08837957 | -0.0155826 | 2.25011467 | 992.44            | 1004.80 | 1024.36 |
|                                                                                                                                                                                    | C | 1.09180759 | 0.00119467 | 3.75055544 | 1079.05           | 1127.29 | 1159.84 |
|                                                                                                                                                                                    | O | -0.1766844 | 0.20950003 | 4.32881862 | 1218.06           | 1309.76 | 1331.97 |
|                                                                                                                                                                                    | H | -0.5095386 | 1.0554586  | 4.01701157 | 1381.01           | 1411.88 | 1423.68 |
|                                                                                                                                                                                    | H | -0.495219  | 0.88895076 | -0.4003137 | 1484.34           | 1497.31 | 1505.71 |
|                                                                                                                                                                                    | H | -0.5430353 | -0.8629292 | -0.3832872 | 1773.11           | 3015.55 | 3055.25 |
|                                                                                                                                                                                    | H | 1.01553917 | -0.0287349 | -0.3963188 | 3082.49           | 3109.05 | 3137.25 |
|                                                                                                                                                                                    | H | -0.9681528 | 0.02977415 | 1.98429173 | 3157.34           | 3172.01 | 3871.48 |
|                                                                                                                                                                                    | H | 2.06800524 | -0.0534041 | 1.78101488 | ! 146.92          | 248.09  | 333.02  |
|                                                                                                                                                                                    | H | 1.81085974 | 0.75185766 | 4.10035097 | !Torsions         |         |         |
|                                                                                                                                                                                    | H | 1.44131754 | -0.9616869 | 4.1293429  |                   |         |         |
| HO <sub>2</sub> + 3-Buten-1-ol<br>+HO <sub>2</sub><br>                                            | O | 0.50553254 | 2.59512924 | 1.64024162 | 1161.48           | 1475.38 | 3553.10 |
|                                                                                                                                                                                    | O | -0.1679742 | 2.44348437 | 0.50783059 |                   |         |         |
|                                                                                                                                                                                    | H | -0.2367003 | 1.48037439 | 0.35008979 |                   |         |         |
|                                                                                                                                                                                    | C | -0.0057061 | 0.02884186 | -0.0078678 | 286.62            | 434.83  | 450.48  |
|                                                                                                                                                                                    | C | 0.00263284 | -0.0200608 | 1.31699621 | 680.08            | 858.08  | 895.61  |
|                                                                                                                                                                                    | C | 1.24134282 | -0.0098615 | 2.15775766 | 978.94            | 993.88  | 1010.15 |
|                                                                                                                                                                                    | C | 1.54270448 | -1.4143536 | 2.68326836 | 1052.50           | 1115.32 | 1168.54 |
|                                                                                                                                                                                    | O | 1.82739126 | -2.3159744 | 1.63744258 | 1214.94           | 1259.79 | 1324.31 |
|                                                                                                                                                                                    | H | -0.9263513 | -0.0222759 | -0.5732051 | 1350.40           | 1382.01 | 1429.52 |
|                                                                                                                                                                                    | H | 0.91543514 | 0.13962953 | -0.5683053 | 1452.55           | 1484.24 | 1522.55 |
|                                                                                                                                                                                    | H | -0.9386507 | -0.1310315 | 1.84848231 | 1731.52           | 3018.97 | 3066.19 |
|                                                                                                                                                                                    | H | 2.09312042 | 0.33063104 | 1.5671235  | 3115.27           | 3119.65 | 3153.66 |
|                                                                                                                                                                                    | H | 1.12001114 | 0.66725427 | 3.00592175 | 3162.54           | 3246.55 | 3843.12 |
|                                                                                                                                                                                    | H | 1.12489172 | -2.2402529 | 0.98347102 | !90.62            | 169.52  | 387.54  |
|                                                                                                                                                                                    | H | 2.4263663  | -1.3913679 | 3.31934447 | !Torsions         |         |         |
|                                                                                                                                                                                    | H | 0.701864   | -1.7694173 | 3.29102127 |                   |         |         |
| O <sub>2</sub> +<br>CH <sub>3</sub> CHCH <sub>2</sub> CH <sub>2</sub> OH<br>+O <sub>2</sub><br> | O | 0.0000000  | 0.0000000  | 0.00794919 | 1758.25           |         |         |
|                                                                                                                                                                                    | O | 0.0000000  | 0.0000000  | 1.19781253 |                   |         |         |
|                                                                                                                                                                                    | C | 0.00281341 | -0.0019374 | 0.01484942 | 257.30            | 380.64  | 479.05  |
|                                                                                                                                                                                    | C | -0.001959  | -0.0259303 | 1.50057013 | 510.72            | 845.45  | 854.59  |
|                                                                                                                                                                                    | C | 1.2665421  | -0.0032136 | 2.28178772 | 969.08            | 977.82  | 1028.25 |
|                                                                                                                                                                                    | C | 1.1149853  | -0.6818202 | 3.63736618 | 1116.92           | 1137.02 | 1159.21 |
|                                                                                                                                                                                    | O | 0.82798446 | -2.0594103 | 3.51015318 | 1213.96           | 1237.42 | 1322.01 |
|                                                                                                                                                                                    | H | 0.09050745 | -2.1474037 | 2.89856753 | 1378.49           | 1403.96 | 1427.09 |
|                                                                                                                                                                                    | H | -0.9137459 | 0.24347263 | 2.02209767 | 1431.43           | 1464.77 | 1481.25 |
|                                                                                                                                                                                    | H | 2.05967721 | -0.5042282 | 1.72039471 | 1489.61           | 1523.41 | 2983.96 |
|                                                                                                                                                                                    | H | 1.60314877 | 1.03100269 | 2.44500852 | 2998.46           | 3016.02 | 3075.03 |
|                                                                                                                                                                                    | H | -0.976915  | -0.2335666 | -0.4004492 | 3075.65           | 3118.68 | 3130.90 |
|                                                                                                                                                                                    | H | 0.29228775 | 0.98431002 | -0.3721617 | 3165.33           | 3849.70 |         |
|                                                                                                                                                                                    | H | 0.72621429 | -0.7151725 | -0.3862884 | !60.37            | 123.22  | 184.04  |
|                                                                                                                                                                                    | H | 2.04274727 | -0.6143266 | 4.2035862  | 354.16 ! Torsions |         |         |
|                                                                                                                                                                                    | H | 0.33362654 | -0.1724965 | 4.21480034 |                   |         |         |

|                                                                                                                                                                                               |                                                                                                                                                                                                                                                                                                                                                                                                                                                                                                        |  |  |                                                                                                                                                                                                                                                                                           |  |  |  |
|-----------------------------------------------------------------------------------------------------------------------------------------------------------------------------------------------|--------------------------------------------------------------------------------------------------------------------------------------------------------------------------------------------------------------------------------------------------------------------------------------------------------------------------------------------------------------------------------------------------------------------------------------------------------------------------------------------------------|--|--|-------------------------------------------------------------------------------------------------------------------------------------------------------------------------------------------------------------------------------------------------------------------------------------------|--|--|--|
| $\text{CH}_2\text{O} + 1\text{-methylethyl}$<br>$2\text{-hydroperoxypropane}$<br>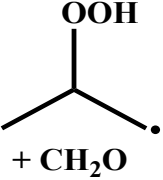<br>$+ \text{CH}_2\text{O}$ |                                                                                                                                                                                                                                                                                                                                                                                                                                                                                                        |  |  |                                                                                                                                                                                                                                                                                           |  |  |  |
| $\text{H}_2\text{O} + \text{C4Y1-3OR}$<br><br>$+ \text{H}_2\text{O}$                                         | O 0.0000000 0.0000000 0.0000000<br>H 0.0000000 0.0000000 0.95889274<br>H 0.9268960684 0.0000000 -0.24563991                                                                                                                                                                                                                                                                                                                                                                                            |  |  | 1627.56 3874.01 3976.38                                                                                                                                                                                                                                                                   |  |  |  |
|                                                                                                                                                                                               | C 0.01197747 0.00182073 0.01066192<br>C 0.01065097 -0.0048425 1.53918978<br>H 1.04155529 -0.0229089 -0.3584002<br>H 0.26396775 -1.0324709 1.8637255<br>C -0.7157058 -1.1646563 -0.595048<br>O -1.1788435 -2.072412 0.04035131<br>H -0.7938646 -1.1583638 -1.6980611<br>C -1.3446658 0.35402668 2.14060679<br>H -1.6156672 1.37118222 1.85609164<br>H -2.1090029 -0.3321692 1.78028195<br>H -0.4259251 0.92659534 -0.377324<br>H -1.2957672 0.29857716 3.22568146<br>O 1.02886539 0.74960657 2.05579181 |  |  | 192.69 342.28 367.58<br>446.62 687.52 709.00<br>846.04 929.95 945.73<br>977.70 1029.13 1121.58<br>1164.04 1189.65 1230.85<br>1268.18 1355.47 1392.79<br>1421.74 1445.32 1494.89<br>1497.83 1855.08 2921.83<br>2958.94 3055.85 3071.02<br>3093.21 3148.44 3166.59<br>! 85.79 159.78 228.12 |  |  |  |
|                                                                                                                                                                                               |                                                                                                                                                                                                                                                                                                                                                                                                                                                                                                        |  |  | !Torsions                                                                                                                                                                                                                                                                                 |  |  |  |
| $\text{OH} + \text{acetaldehyde} +$<br>$\text{vinyl alcohol}$<br><br>$+ \text{OH}$                         | O 0.00000000 0.00000000 -0.00571069<br>H 0.00000000 0.00000000 0.96571069                                                                                                                                                                                                                                                                                                                                                                                                                              |  |  | 3776.00                                                                                                                                                                                                                                                                                   |  |  |  |
|                                                                                                                                                                                               | C -0.0018794 -1.897E-06 -0.0001381<br>C -0.0031285 -1.48E-06 1.49919735<br>O 0.98635722 1.3699E-05 2.17677025<br>H 1.01686213 1.266E-05 -0.3774697<br>H -0.5402751 0.87702138 -0.3636967<br>H -0.5402500 -0.8770407 -0.3636964<br>H -1.0033142 -1.645E-05 1.97459753                                                                                                                                                                                                                                   |  |  | 513.29 776.08 900.41<br>1138.06 1146.18 1379.68<br>1433.59 1464.85 1474.90<br>1874.28 2942.79 3063.52<br>3127.31 3180.67<br>! 157.82 !Torsions                                                                                                                                            |  |  |  |
|                                                                                                                                                                                               | C 0.00108637 0.00000000 0.00545105<br>C -0.00237744 0.00000000 1.329579641<br>H 0.922217046 0.00000000 -0.563562232<br>H -0.931617023 0.00000000 -0.535007759<br>H -0.916296910 0.00000000 1.908645540<br>O 1.082393644 0.00000000 2.142130840<br>H 1.881163785 0.00000000 1.605445553                                                                                                                                                                                                                 |  |  | 498.84 728.26 861.80<br>972.01 1017.42 1140.88<br>1334.37 1359.87 1452.26<br>1739.13 3176.70 3216.02<br>3281.22 3861.17 ! 449.99<br>!Torsions                                                                                                                                             |  |  |  |
|                                                                                                                                                                                               |                                                                                                                                                                                                                                                                                                                                                                                                                                                                                                        |  |  | !Torsions                                                                                                                                                                                                                                                                                 |  |  |  |
| $\text{OH} + 3\text{-Hydroxybutanal}$<br><br>$+ \text{OH}$                                                 | O 0.00000000 0.00000000 -0.00571069<br>H 0.00000000 0.00000000 0.96571069                                                                                                                                                                                                                                                                                                                                                                                                                              |  |  | 3776.00                                                                                                                                                                                                                                                                                   |  |  |  |
|                                                                                                                                                                                               | C 0.00700152 0.01152681 -5.053E-05<br>C 0.01103546 0.00010228 1.53388032<br>C 1.53420836 0.00354836 0.14270351<br>H -0.463008 -0.8283539 -0.5025336<br>H -0.3789321 0.94940125 -0.3991921<br>H -0.2531019 -0.9553511 1.98926856<br>O -0.7067605 0.95840844 2.21959151                                                                                                                                                                                                                                  |  |  | 213.21 338.50 409.14<br>464.65 676.87 772.36<br>855.07 940.04 980.30<br>988.62 1082.15 1143.22<br>1191.40 1247.18 1302.59<br>1333.80 1399.46 1405.54<br>1420.14 1439.87 1454.22                                                                                                           |  |  |  |

|                                                                                                                                  |   |               |               |               |          |           |           |
|----------------------------------------------------------------------------------------------------------------------------------|---|---------------|---------------|---------------|----------|-----------|-----------|
|                                                                                                                                  | H | -0.4160401    | 1.82359764    | 1.91293559    | 1487.25  | 1504.84   | 1849.49   |
|                                                                                                                                  | O | 1.42199051    | 0.2254861     | 1.56571319    | 2964.86  | 3025.08   | 3045.73   |
|                                                                                                                                  | C | 2.33365908    | 1.07954854    | -0.544105     | 3067.42  | 3084.91   | 3140.69   |
|                                                                                                                                  | H | 3.35718482    | 1.08934345    | -0.1706696    | 3154.55  | 3848.24   |           |
|                                                                                                                                  | H | 2.35852185    | 0.90607726    | -1.620527     | ! 109.96 | 173.47    | 236.01    |
|                                                                                                                                  | H | 1.88832736    | 2.05696839    | -0.3564474    | 529.40   | !Torsions |           |
|                                                                                                                                  | H | 1.9687381     | -0.9810236    | -0.0462515    |          |           |           |
| OH + C <sub>4</sub> H <sub>7</sub> OHCYO1-3<br>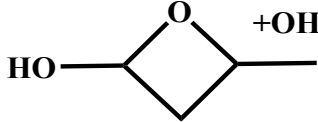 | O | 0.00000000    | 0.00000000    | -0.00571069   | 3776.00  |           |           |
|                                                                                                                                  | H | 0.00000000    | 0.00000000    | 0.96571069    |          |           |           |
|                                                                                                                                  | C | 0.0070015235  | 0.0115268149  | -0.000050534  | 72.14    | 332.67    | 423.56    |
|                                                                                                                                  | C | 0.0110354569  | 0.0001022818  | 1.5338803225  | 454.62   | 524.24    | 676.53    |
|                                                                                                                                  | C | 1.5342083582  | 0.003548358   | 0.1427035088  | 840.88   | 917.8424  | 931.87    |
|                                                                                                                                  | H | -0.4630079731 | -0.828353897  | -0.5025336453 | 953.69   | 1029.17   | 1080.46   |
|                                                                                                                                  | H | -0.3789321417 | 0.9494012497  | -0.3991921367 | 1112.78  | 1133.61   | 1200.05   |
|                                                                                                                                  | H | -0.2531018529 | -0.9553511458 | 1.9892685632  | 1204.59  | 1249.96   | 1288.24   |
|                                                                                                                                  | O | -0.7067605096 | 0.9584084366  | 2.2195915148  | 1330.43  | 1358.75   | 1392.10   |
|                                                                                                                                  | H | -0.4160400513 | 1.8235976392  | 1.9129355901  | 1416.72  | 1459.27   | 1483.67   |
|                                                                                                                                  | O | 1.4219905058  | 0.2254860992  | 1.5657131945  | 1496.22  | 1498.83   | 3059.44   |
|                                                                                                                                  | C | 2.3336590804  | 1.0795485354  | -0.544104959  | 3061.31  | 3093.34   | 3097.13   |
|                                                                                                                                  | H | 3.3571848241  | 1.0893434452  | -0.1706696453 | 3137.26  | 3142.30   | 3170.74   |
|                                                                                                                                  | H | 2.358521847   | 0.9060772597  | -1.6205269725 | 3852.65  |           |           |
|                                                                                                                                  | H | 1.8883273633  | 2.0569683862  | -0.3564473748 | ! 223.93 | 309.76    | !Torsions |
|                                                                                                                                  | H | 1.9687380988  | -0.9810236182 | -0.0462515032 |          |           |           |
| OH + (3-methyloxiran-2-yl)methanol<br>        | O | 0.00000000    | 0.00000000    | -0.00571069   | 3776.00  |           |           |
|                                                                                                                                  | H | 0.00000000    | 0.00000000    | 0.96571069    |          |           |           |
|                                                                                                                                  | C | -0.0249967    | -0.0096645    | 0.00557249    | 216.98   | 252.48    | 345.91    |
|                                                                                                                                  | C | 0.02036494    | -0.0109615    | 1.46669032    | 487.45   | 661.03    | 810.18    |
|                                                                                                                                  | O | 1.2204231     | -0.0527622    | 0.69066332    | 849.03   | 928.33    | 990.13    |
|                                                                                                                                  | H | -0.2921184    | -0.9348947    | -0.4976453    | 1043.17  | 1061.80   | 1120.59   |
|                                                                                                                                  | H | -0.1345916    | 0.94404806    | 1.95743573    | 1156.40  | 1178.21   | 1191.96   |
|                                                                                                                                  | C | -0.2506700    | 1.25480857    | -0.7855856    | 1236.18  | 1295.03   | 1352.51   |
|                                                                                                                                  | H | -1.3181558    | 1.40124612    | -0.9530579    | 1383.43  | 1416.82   | 1437.97   |
|                                                                                                                                  | H | 0.23056504    | 1.14840617    | -1.7646988    | 1481.56  | 1498.30   | 1513.48   |
|                                                                                                                                  | O | 0.23144785    | 2.38691919    | -0.1054971    | 1542.00  | 3025.36   | 3068.00   |
|                                                                                                                                  | H | 1.12125414    | 2.17003775    | 0.19537663    | 3108.80  | 3138.49   | 3142.99   |
|                                                                                                                                  | C | -0.282753     | -1.2391095    | 2.27009872    | 3144.84  | 3166.51   | 3836.21   |
|                                                                                                                                  | H | 0.34283428    | -1.2760561    | 3.16164578    | ! 139.24 | 195.56    | 432.82 !  |
|                                                                                                                                  | H | -1.3258835    | -1.2390351    | 2.58640753    | Torsions |           |           |
|                                                                                                                                  | H | -0.0933594    | -2.1339043    | 1.67888819    |          |           |           |
| OH + Oxiraneethanol<br>                       | O | 0.00000000    | 0.00000000    | -0.00571069   | 3776.00  |           |           |
|                                                                                                                                  | H | 0.00000000    | 0.00000000    | 0.96571069    |          |           |           |
|                                                                                                                                  | O | -0.0161659    | 0.05500447    | 0.02027366    | 243.59   | 372.40    | 402.01    |
|                                                                                                                                  | C | 0.01372416    | 0.00237712    | 1.43843015    | 533.05   | 794.14    | 873.02    |
|                                                                                                                                  | C | 1.2566078     | 0.01099717    | 0.66567049    | 906.01   | 956.93    | 980.27    |
|                                                                                                                                  | C | 2.10946765    | 1.23984057    | 0.51650521    | 1031.81  | 1109.26   | 1130.62   |
|                                                                                                                                  | C | 2.50749579    | 1.46341828    | -0.9385673    | 1161.74  | 1166.98   | 1183.99   |
|                                                                                                                                  | O | 1.41550286    | 1.87510826    | -1.7297556    | 1241.43  | 1259.51   | 1309.05   |
|                                                                                                                                  | H | 0.65618725    | 1.32816116    | -1.5025392    | 1352.46  | 1386.32   | 1448.12   |
|                                                                                                                                  | H | 1.76716602    | -0.9374901    | 0.52532892    | 1454.23  | 1476.40   | 1525.93   |
|                                                                                                                                  | H | 1.56209406    | 2.11687007    | 0.86711725    | 1544.54  | 3007.76   | 3067.44   |
|                                                                                                                                  | H | 3.00247223    | 1.1268698     | 1.13479366    | 3108.70  | 3114.89   | 3131.63   |
|                                                                                                                                  | H | -0.350445     | -0.9235414    | 1.86556452    | 3143.47  | 3225.64   | 3846.96   |

|                           |   |            |            |            |          |           |           |
|---------------------------|---|------------|------------|------------|----------|-----------|-----------|
|                           | H | -0.2958442 | 0.91297212 | 1.9377506  | ! 78.08  | 173.72    | 445.42 !  |
|                           | H | 3.25475097 | 2.25378374 | -1.003621  | Torsions |           |           |
|                           | H | 2.96151369 | 0.547849   | -1.339243  |          |           |           |
| nbutanol-ROO3 =<br>QOOH-0 | C | 0.02837215 | 0.00766156 | 0.02122633 | 1811.93i | 106.63    | 233.95    |
|                           | C | -0.0025126 | -0.0200743 | 1.55979562 | 248.04   | 343.44    | 372.21    |
|                           | C | 1.39709421 | 0.00120872 | 2.17169536 | 413.86   | 482.96    | 530.88    |
|                           | O | 2.33938915 | -0.6348994 | 1.29173946 | 619.63   | 792.18    | 879.61    |
|                           | O | 1.89866551 | -1.9153466 | 1.01754956 | 900.15   | 962.87    | 998.82    |
|                           | H | 1.27042307 | -1.7778534 | 0.14956522 | 1013.85  | 1037.76   | 1063.26   |
|                           | H | -0.9721039 | 0.27802825 | -0.3387796 | 1146.52  | 1179.32   | 1192.13   |
|                           | H | -0.5534222 | 0.84702198 | 1.92378204 | 1221.06  | 1263.77   | 1323.37   |
|                           | H | -0.5432937 | -0.9160101 | 1.86575761 | 1366.90  | 1379.14   | 1391.48   |
|                           | H | 1.7729604  | 1.02637961 | 2.18316818 | 1412.15  | 1474.62   | 1476.52   |
|                           | H | 0.74449784 | 0.75248794 | -0.340154  | 1487.44  | 1504.16   | 1643.98   |
|                           | C | 1.45007081 | -0.6029266 | 3.55768575 | 3005.14  | 3061.25   | 3070.17   |
|                           | H | 2.45007257 | -0.5130885 | 3.97810499 | 3083.11  | 3086.30   | 3135.41   |
|                           | H | 0.7447733  | -0.0944919 | 4.21566426 | 3145.10  | 3156.94   |           |
|                           | H | 1.18109312 | -1.6572329 | 3.5081386  | ! 231.03 | !Torsions |           |
|                           | O | 0.28349822 | -1.2517366 | -0.5009957 |          |           |           |
| nbutanol-ROO3 =<br>QOOH-1 | C | -0.0019545 | -0.0111867 | 0.0178515  | 1934.17i | 109.56    | 166.75    |
|                           | C | -0.0050799 | -0.0195949 | 1.51690615 | 264.42   | 319.91    | 391.77    |
|                           | C | 1.43413368 | 0.00679581 | 2.0604952  | 477.17   | 525.01    | 533.52    |
|                           | H | -0.5504508 | 0.85186339 | 1.88819602 | 676.88   | 835.61    | 888.88    |
|                           | H | -0.4895257 | -0.9233846 | 1.88694474 | 908.83   | 984.71    | 1020.15   |
|                           | H | 1.93860809 | 0.91039458 | 1.70900418 | 1073.90  | 1097.17   | 1139.36   |
|                           | O | 2.10454303 | -1.120275  | 1.51743083 | 1170.90  | 1195.46   | 1226.35   |
|                           | O | 2.28317061 | -0.9120486 | 0.16185905 | 1241.83  | 1282.14   | 1319.52   |
|                           | H | 1.12956666 | -0.6517777 | -0.1830846 | 1367.98  | 1379.48   | 1415.36   |
|                           | H | -0.7849898 | -0.5888028 | -0.4755646 | 1419.16  | 1458.70   | 1487.59   |
|                           | O | 0.15201438 | 1.27460822 | -0.4690927 | 1503.95  | 1602.74   | 3061.32   |
|                           | H | 0.18813209 | 1.25969673 | -1.4287089 | 3071.14  | 3074.83   | 3087.69   |
|                           | C | 1.49895066 | -0.1246912 | 3.56432622 | 3127.65  | 3148.94   | 3158.78   |
|                           | H | 2.53278857 | -0.1181842 | 3.90339758 | 3889.21  |           |           |
|                           | H | 0.9698457  | 0.70327871 | 4.03396043 | ! 205.34 | 328.32    | !Torsions |
|                           | H | 1.03414276 | -1.0587721 | 3.87996013 |          |           |           |
| nbutanol-ROO3 =<br>QOOH-2 | C | 0.04257816 | 0.01464322 | 0.02091842 | 2167.29i | 179.80    | 208.95    |
|                           | C | 0.00377908 | 0.00993475 | 1.53171742 | 261.87   | 338.20    | 431.94    |
|                           | C | 1.36161629 | 0.00397873 | 2.24527703 | 535.27   | 623.90    | 716.05    |
|                           | C | 2.46707336 | 0.85162416 | 1.69273848 | 804.04   | 854.97    | 898.92    |
|                           | O | 2.07247322 | 2.14220797 | 1.28992576 | 972.35   | 1026.72   | 1035.80   |
|                           | O | -0.5837283 | 1.23624457 | 1.9726572  | 1052.68  | 1102.17   | 1162.73   |
|                           | O | -0.3090095 | 1.26320944 | 3.34233719 | 1175.50  | 1190.63   | 1253.99   |
|                           | H | 0.62676145 | 0.85914523 | -0.3396463 | 1305.05  | 1355.29   | 1381.04   |
|                           | H | -0.968365  | 0.08214999 | -0.3779647 | 1386.05  | 1417.15   | 1440.65   |
|                           | H | 0.4903096  | -0.9119201 | -0.3377109 | 1486.18  | 1499.07   | 1510.25   |
|                           | H | -0.5932531 | -0.8210606 | 1.91588356 | 1743.89  | 3007.45   | 3039.36   |
|                           | H | 0.77887611 | 0.65956187 | 3.24005874 | 3064.86  | 3074.57   | 3147.49   |
|                           | H | 1.69902541 | -0.9586535 | 2.61995454 | 3155.68  | 3165.04   | 3850.69   |
|                           | H | 3.27783672 | 0.90722567 | 2.42759416 | ! 125.90 | 129.43    | 233.19 !  |
|                           | H | 2.88363201 | 0.35280603 | 0.80740176 | Torsions |           |           |
|                           | H | 1.28147127 | 2.40284715 | 1.77308943 |          |           |           |
| nbutanol-ROO3 =<br>QOOH-4 | H | 0.0132293  | -0.0064427 | -0.0293898 | 2253.95i | 183.78    | 241.08    |
|                           | O | 0.02427883 | -0.0303989 | 1.20445396 | 335.83   | 408.08    | 423.20    |
|                           | O | 1.41539903 | -0.0144147 | 1.30263488 | 478.29   | 496.39    | 598.35    |
|                           | C | 1.83292057 | -0.7864595 | 0.17288498 | 677.31   | 842.41    | 889.12    |

|                                                                        |   |            |            |            |           |         |          |
|------------------------------------------------------------------------|---|------------|------------|------------|-----------|---------|----------|
|                                                                        | H | 1.56796585 | -1.8339395 | 0.34980521 | 925.05    | 990.30  | 1009.08  |
|                                                                        | C | 0.96379773 | -0.2256395 | -0.9415369 | 1031.25   | 1066.65 | 1124.81  |
|                                                                        | H | 1.24287472 | 0.76475378 | -1.2924803 | 1134.00   | 1155.77 | 1163.08  |
|                                                                        | C | 3.32912053 | -0.6306096 | -0.0015121 | 1233.79   | 1264.44 | 1337.72  |
|                                                                        | H | 3.61877526 | -1.1899179 | -0.8941788 | 1357.96   | 1394.49 | 1410.69  |
|                                                                        | H | 3.56795798 | 0.42137233 | -0.1696171 | 1440.11   | 1458.24 | 1463.42  |
|                                                                        | H | 0.61541662 | -0.899855  | -1.7151653 | 1519.27   | 1753.59 | 3012.50  |
|                                                                        | C | 4.12035513 | -1.141316  | 1.19943882 | 3049.69   | 3066.90 | 3115.38  |
|                                                                        | H | 5.17629062 | -1.1999952 | 0.93868938 | 3117.83   | 3120.91 | 3221.31  |
|                                                                        | H | 3.78658432 | -2.1560977 | 1.45063511 | 3853.00   |         |          |
|                                                                        | O | 4.04111142 | -0.2865024 | 2.31562407 | ! 64.03   | 155.77  | 423.20   |
|                                                                        | H | 3.11382866 | -0.1420083 | 2.52971335 | !Torsions |         |          |
| nbutanol-ROO3 = HO <sub>2</sub> +<br>2-Buten-1-ol                      | C | 0.01072864 | 0.00320116 | 0.00049234 | 1065.07i  | 129.95  | 144.32   |
|                                                                        | C | -0.0088239 | -0.0029563 | 1.38638316 | 242.49    | 254.71  | 371.25   |
|                                                                        | O | 2.10354408 | -0.0153769 | -0.265801  | 463.78    | 529.36  | 644.34   |
|                                                                        | O | 2.48870731 | -0.1240274 | 0.92946977 | 686.00    | 854.25  | 888.26   |
|                                                                        | H | 1.32424504 | -0.1557602 | 1.45353854 | 974.67    | 1015.94 | 1033.14  |
|                                                                        | H | -0.0178758 | 0.96172606 | -0.5029914 | 1093.21   | 1124.65 | 1162.31  |
|                                                                        | H | -0.3538591 | -0.9103295 | 1.87624555 | 1202.78   | 1279.48 | 1291.27  |
|                                                                        | C | -0.2601245 | -1.2072835 | -0.8254219 | 1308.57   | 1385.22 | 1390.86  |
|                                                                        | H | 0.30640864 | -1.1880593 | -1.7544336 | 1411.79   | 1423.50 | 1476.73  |
|                                                                        | H | -0.0170468 | -2.1179736 | -0.2794124 | 1492.99   | 1531.57 | 1604.89  |
|                                                                        | H | -1.3223266 | -1.2380152 | -1.0811524 | 1649.55   | 3041.04 | 3056.39  |
|                                                                        | C | -0.2221951 | 1.29593409 | 2.15027853 | 3101.67   | 3122.81 | 3145.25  |
|                                                                        | H | 0.12731278 | 1.18045855 | 3.18060928 | 3152.11   | 3200.80 | 3860.51  |
|                                                                        | H | -1.2817491 | 1.54924967 | 2.19468096 | ! 83.90   | 196.17  | 349.64 ! |
|                                                                        | O | 0.40625888 | 2.39245823 | 1.51858984 | Torsions  |         |          |
|                                                                        | H | 1.35445545 | 2.23233525 | 1.49118181 |           |         |          |
| nbutanol-ROO3 = HO <sub>2</sub> +<br>3-Buten-1-ol                      | C | 0.05269011 | 0.00087746 | 0.0104665  | 1064.03i  | 126.22  | 213.99   |
|                                                                        | C | -0.0286668 | 0.02354654 | 1.39393965 | 304.51    | 383.95  | 469.72   |
|                                                                        | O | 2.16031404 | -0.0549500 | -0.1424562 | 489.03    | 551.93  | 619.49   |
|                                                                        | O | 2.48466384 | -0.110566  | 1.07298547 | 688.10    | 814.37  | 909.58   |
|                                                                        | H | 1.30354465 | -0.0699214 | 1.55100815 | 972.22    | 1008.28 | 1019.21  |
|                                                                        | H | 0.07801056 | 0.94089962 | -0.5294789 | 1068.68   | 1122.30 | 1165.68  |
|                                                                        | H | -0.4001453 | -0.8626732 | 1.8965529  | 1233.74   | 1254.31 | 1287.25  |
|                                                                        | C | -0.2776839 | -1.2040886 | -0.8094636 | 1313.07   | 1341.96 | 1401.11  |
|                                                                        | H | -0.1369528 | -2.1144766 | -0.2238199 | 1408.07   | 1436.96 | 1442.32  |
|                                                                        | H | -1.3511200 | -1.1265243 | -1.0201251 | 1461.12   | 1512.72 | 1584.88  |
|                                                                        | H | -0.2315419 | 0.96600135 | 1.8877827  | 1639.39   | 3022.36 | 3032.91  |
|                                                                        | C | 0.46615997 | -1.3456697 | -2.1387424 | 3103.46   | 3116.20 | 3139.99  |
|                                                                        | H | -0.1447906 | -1.9281648 | -2.8267291 | 3179.48   | 3227.94 | 3858.21  |
|                                                                        | H | 0.61055079 | -0.3554702 | -2.5874409 | ! 62.46   | 156.36  | 452.64   |
|                                                                        | O | 1.68338715 | -2.0434949 | -2.0287721 | !Torsions |         |          |
|                                                                        | H | 2.29549969 | -1.5125243 | -1.5108527 |           |         |          |
| QOOH-0 = CH <sub>2</sub> O + 1-<br>methylethyl<br>2-hydroperoxypropane | O | 0.02979523 | 0.00584293 | 0.02918248 | 388.01i   | 183.09  | 209.83   |
|                                                                        | C | 0.04956406 | 0.04312022 | 1.26156121 | 278.92    | 342.56  | 376.52   |
|                                                                        | C | 2.1323739  | -0.015354  | 1.71408852 | 464.94    | 553.18  | 606.72   |
|                                                                        | C | 2.59724857 | 1.41009453 | 1.68397651 | 650.39    | 846.82  | 898.07   |
|                                                                        | C | 4.1157114  | 1.47561204 | 1.5539977  | 935.72    | 959.58  | 1005.14  |
|                                                                        | O | 1.96014692 | 2.17566629 | 0.67210774 | 1105.91   | 1130.36 | 1162.08  |
|                                                                        | O | 2.21938127 | 1.57098782 | -0.5864587 | 1192.96   | 1252.75 | 1336.27  |
|                                                                        | H | -0.0356346 | 0.99905908 | 1.79682142 | 1384.01   | 1396.42 | 1461.28  |
|                                                                        | H | -0.1631165 | -0.8644803 | 1.84462586 | 1475.90   | 1484.55 | 1487.86  |
|                                                                        | H | 2.11275351 | -0.5078584 | 2.6785269  | 1502.41   | 1628.81 | 2970.72  |
|                                                                        | H | 2.40601219 | -0.6410487 | 0.87513639 | 3051.13   | 3071.61 | 3083.01  |



|                                                         |   |             |             |             |                           |         |          |
|---------------------------------------------------------|---|-------------|-------------|-------------|---------------------------|---------|----------|
|                                                         | H | 2.28021893  | 1.92198543  | 2.59526418  | 3147.70                   | 3149.79 | 3162.86  |
|                                                         | H | 4.41990686  | 1.03398811  | 0.60716816  | 3251.33                   | 3643.94 | ! 102.67 |
|                                                         | H | 4.4354821   | 2.51625448  | 1.57773787  | 160.02                    | 227.97  | 629.99   |
|                                                         | H | 4.59846547  | 0.93718229  | 2.36920739  | !Torsions                 |         |          |
|                                                         | H | 1.37624569  | 1.10274193  | -0.7273716  |                           |         |          |
| QOOH-1 = H <sub>2</sub> O +<br>C <sub>4</sub> Y1-3OR    | C | 0.00684864  | -0.0014551  | 0.02135046  | 2453.88i                  | 123.16  | 157.80   |
|                                                         | C | 0.019483    | 0.00599331  | 1.54026536  | 255.75                    | 272.24  | 288.55   |
|                                                         | H | 1.0265929   | 0.02276984  | -0.3592989  | 373.51                    | 410.00  | 455.18   |
|                                                         | H | -0.4729832  | -0.914551   | -0.329004   | 534.38                    | 552.36  | 652.10   |
|                                                         | H | -0.5363642  | 0.85771873  | -0.3734844  | 778.56                    | 890.21  | 918.74   |
|                                                         | C | -1.4706716  | 0.11716868  | 2.10912873  | 995.04                    | 1004.91 | 1016.03  |
|                                                         | H | 0.54209002  | 0.88256505  | 1.93341918  | 1082.03                   | 1103.00 | 1124.84  |
|                                                         | C | -1.5706177  | -0.1406051  | 3.534448    | 1208.61                   | 1248.75 | 1280.30  |
|                                                         | H | -1.8642893  | 1.09995542  | 1.86203615  | 1296.90                   | 1345.21 | 1398.08  |
|                                                         | H | -2.0112748  | -0.6434345  | 1.54027206  | 1432.40                   | 1464.37 | 1486.50  |
|                                                         | H | -1.8058115  | 0.62979903  | 4.25589548  | 1501.56                   | 1579.83 | 2682.36  |
|                                                         | O | -1.3281409  | -1.3179688  | 4.05327386  | 3051.50                   | 3067.27 | 3068.54  |
|                                                         | H | -0.993164   | -1.9268564  | 3.33156805  | 3143.11                   | 3152.71 | 3155.64  |
|                                                         | O | 0.6689598   | -1.0677438  | 2.07869303  | 3219.14                   | 3882.22 |          |
|                                                         | O | -0.3966111  | -2.3990109  | 1.90713138  | ! 221.99 !Torsions        |         |          |
|                                                         | H | 0.32896908  | -3.0313457  | 1.9032993   |                           |         |          |
| QOOH-1 = acetaldehyde<br>+ vinyl + OH                   | C | -0.0120445  | 0.0296084   | 0.02046295  | 1017.50i                  | 60.73   | 78.29    |
|                                                         | C | 0.01780292  | 0.00348952  | 1.52952604  | 140.72                    | 194.22  | 281.63   |
|                                                         | H | 1.02150687  | 0.02944579  | -0.3237746  | 313.95                    | 363.54  | 432.58   |
|                                                         | H | -0.5061246  | -0.8619507  | -0.3669405  | 491.92                    | 502.29  | 534.23   |
|                                                         | H | -0.5153115  | 0.91934701  | -0.3578456  | 766.92                    | 877.56  | 897.03   |
|                                                         | C | -1.6679734  | -0.1653827  | 2.15296106  | 918.56                    | 1001.49 | 1026.68  |
|                                                         | H | 0.27849684  | 0.97810149  | 1.96817471  | 1089.43                   | 1120.57 | 1159.45  |
|                                                         | C | -2.4039865  | 0.91289897  | 1.64276661  | 1194.54                   | 1287.42 | 1335.06  |
|                                                         | H | -1.968572   | -1.1379569  | 1.78485762  | 1365.36                   | 1388.66 | 1440.11  |
|                                                         | H | -1.4735416  | -0.1538669  | 3.22131091  | 1458.69                   | 1476.02 | 1501.14  |
|                                                         | H | -2.9158384  | 0.88359343  | 0.69224073  | 1555.35                   | 2981.25 | 3062.97  |
|                                                         | O | -2.3048136  | 2.15740289  | 2.12746848  | 3128.07                   | 3141.31 | 3150.29  |
|                                                         | H | -1.8347402  | 2.15062721  | 2.96948284  | 3218.10                   | 3236.99 | 3834.86  |
|                                                         | O | 0.58051524  | -1.0243817  | 2.08911093  | 3848.92                   |         |          |
|                                                         | O | 2.34303488  | -0.8857776  | 1.74182874  | ! 150.76 229.22 !Torsions |         |          |
|                                                         | H | 2.41182637  | -1.8370625  | 1.5921557   |                           |         |          |
| QOOH-1 = OH + 3-<br>Hydroxybutanal                      | C | -0.0008636  | -0.0161437  | 0.03651247  | 1956.68i                  | 88.10   | 109.26   |
|                                                         | C | 0.0242361   | 0.01786314  | 1.5521211   | 158.72                    | 194.72  | 245.01   |
|                                                         | H | 1.02453835  | 0.03077935  | -0.32333307 | 308.64                    | 335.26  | 435.85   |
|                                                         | H | -0.45338599 | -0.94630430 | -0.308065   | 495.91                    | 570.27  | 641.37   |
|                                                         | H | -0.56148083 | 0.82666302  | -0.3668178  | 759.39                    | 883.31  | 901.69   |
|                                                         | C | -1.51464161 | -0.0797284  | 2.09328545  | 938.77                    | 969.18  | 997.79   |
|                                                         | H | 0.42866867  | 0.96914732  | 1.91462564  | 1057.66                   | 1123.52 | 1133.89  |
|                                                         | C | -1.50191370 | -0.0612784  | 3.53630941  | 1219.85                   | 1254.00 | 1297.22  |
|                                                         | H | -2.08815622 | 0.74112538  | 1.6704430   | 1301.26                   | 1327.95 | 1391.18  |
|                                                         | H | -1.86246901 | -1.02760412 | 1.67912763  | 1411.37                   | 1474.86 | 1487.74  |
|                                                         | H | -1.93311109 | 0.72544510  | 4.1414815   | 1504.14                   | 1566.23 | 2616.29  |
|                                                         | O | -0.78218893 | -0.94883087 | 4.16898422  | 3034.36                   | 3066.93 | 3069.71  |
|                                                         | H | -0.0841746  | -1.27042726 | 3.50629707  | 3144.16                   | 3158.13 | 3164.88  |
|                                                         | O | 0.6620020   | -1.04332094 | 2.11161189  | 3209.63                   | 3851.90 |          |
|                                                         | O | 2.3478571   | -0.90392102 | 1.66076907  | ! 228.22 !Torsions        |         |          |
|                                                         | H | 2.40864571  | -1.82793579 | 1.38881437  |                           |         |          |
| QOOH-1 = OH +<br>C <sub>4</sub> H <sub>7</sub> OHCY01-3 | C | 0.01835109  | -0.0632498  | 0.03350746  | 977.68i                   | 75.45   | 124.32   |
|                                                         | C | 0.00689553  | 0.00859215  | 1.52778557  | 198.40                    | 269.30  | 327.40   |

|                                             |   |            |            |            |           |          |           |
|---------------------------------------------|---|------------|------------|------------|-----------|----------|-----------|
|                                             | H | 0.94629892 | -0.0588759 | -0.5179687 | 393.19    | 436.08   | 464.74    |
|                                             | C | 0.26730159 | -1.4638362 | 1.83153037 | 475.96    | 628.55   | 764.30    |
|                                             | H | 0.74610383 | 0.69302452 | 1.9506436  | 856.57    | 916.58   | 952.93    |
|                                             | H | -0.9827274 | 0.31199545 | 1.87240847 | 978.54    | 1060.37  | 1100.26   |
|                                             | O | -0.2102031 | -2.0054786 | 0.58902837 | 1114.46   | 1155.83  | 1209.40   |
|                                             | O | -0.4375951 | -3.5854798 | 1.03623899 | 1247.32   | 1287.21  | 1323.25   |
|                                             | H | -0.2959905 | -3.9538791 | 0.15752182 | 1370.70   | 1381.70  | 1411.74   |
|                                             | H | -0.3477613 | -1.856669  | 2.64112517 | 1463.44   | 1482.65  | 1496.08   |
|                                             | C | 1.72440934 | -1.8037081 | 2.056907   | 1504.97   | 3053.84  | 3060.80   |
|                                             | H | 2.06989284 | -1.3956934 | 3.00763209 | 3091.01   | 3112.37  | 3130.91   |
|                                             | H | 1.84522945 | -2.8844677 | 2.06927483 | 3162.17   | 3230.40  | 3850.93   |
|                                             | H | 2.34140307 | -1.3898731 | 1.25726934 | 3873.09   | ! 110.16 | 242.50    |
|                                             | O | -1.0137116 | 0.36428932 | -0.7096955 | !Torsions |          |           |
|                                             | H | -1.8291915 | 0.28723839 | -0.2031573 |           |          |           |
| QOOH-2 = OH + (3-methyloxiran-2-yl)methanol | O | 0.01706775 | 0.06405506 | 0.00849643 | 995.66i   | 114.20   | 146.99    |
|                                             | C | 0.00618249 | -0.0035700 | 1.41935226 | 233.34    | 234.26   | 267.54    |
|                                             | C | 1.38189735 | 0.01064954 | 1.97962154 | 370.08    | 423.36   | 480.16    |
|                                             | H | 2.1048509  | -0.6954651 | 1.59388884 | 515.69    | 740.18   | 874.74    |
|                                             | C | 1.85847836 | 1.08786432 | 2.86416377 | 908.23    | 961.52   | 1008.46   |
|                                             | C | 3.11698205 | 0.8574901  | 3.65869828 | 1077.85   | 1107.55  | 1123.97   |
|                                             | O | 2.05390427 | 1.73928192 | 1.63927445 | 1152.01   | 1202.48  | 1228.14   |
|                                             | O | 2.60278575 | 3.31772898 | 1.95112733 | 1268.71   | 1332.93  | 1388.68   |
|                                             | H | 0.51335934 | 0.85540155 | -0.2260538 | 1404.58   | 1423.38  | 1469.37   |
|                                             | H | -0.5749249 | 0.81410592 | 1.85583751 | 1495.08   | 1497.35  | 1504.74   |
|                                             | H | -0.4894811 | -0.9437992 | 1.67486339 | 3042.65   | 3070.16  | 3075.26   |
|                                             | H | 1.06968546 | 1.56604179 | 3.44913827 | 3084.41   | 3146.59  | 3160.71   |
|                                             | H | 3.86391274 | 0.35877462 | 3.04098838 | 3212.35   | 3846.07  | 3849.53   |
|                                             | H | 3.5141402  | 1.81610891 | 3.98608252 | ! 62.43   | 215.17   | 459.43    |
|                                             | H | 2.90969362 | 0.24154176 | 4.53327617 | !Torsions |          |           |
|                                             | H | 3.41098119 | 3.23016136 | 1.43029688 |           |          |           |
| QOOH-4 = OH + Oxiraneethanol                | O | 0.15091019 | -0.1138643 | -0.0191668 | 976.47i   | 202.06   | 234.14    |
|                                             | C | 0.02868792 | 0.01853398 | 1.37408865 | 242.13    | 274.06   | 359.57    |
|                                             | C | 1.37743459 | 0.01884924 | 2.09178014 | 403.73    | 443.21   | 538.77    |
|                                             | C | 2.1195153  | 1.3360852  | 2.04680336 | 555.84    | 787.18   | 798.35    |
|                                             | C | 3.56393238 | 1.30265652 | 2.32457116 | 912.68    | 949.02   | 971.89    |
|                                             | H | 4.13001503 | 0.41171432 | 2.10257112 | 1037.88   | 1055.82  | 1130.64   |
|                                             | H | 4.07836222 | 2.19170582 | 2.64881771 | 1155.66   | 1195.28  | 1247.81   |
|                                             | O | 2.571705   | 1.76125712 | 0.78917292 | 1267.65   | 1302.99  | 1354.00   |
|                                             | O | 1.26195637 | 2.41003075 | -0.0581483 | 1413.66   | 1434.42  | 1456.67   |
|                                             | H | 0.53867848 | 0.70792872 | -0.35062   | 1471.82   | 1482.70  | 1512.49   |
|                                             | H | -0.5333167 | 0.9219793  | 1.64184039 | 3018.77   | 3054.05  | 3077.04   |
|                                             | H | -0.5498509 | -0.8392904 | 1.71671273 | 3105.51   | 3108.88  | 3191.13   |
|                                             | H | 1.22976746 | -0.2267494 | 3.14729307 | 3312.99   | 3744.82  | 3859.04 ! |
|                                             | H | 2.00010499 | -0.7613367 | 1.64830567 | 65.12     | 139.07   | 611.21    |
|                                             | H | 1.58373000 | 2.13965734 | 2.55682525 | !Torsions |          |           |
|                                             | H | 1.8015484  | 2.92235564 | -0.6724881 |           |          |           |

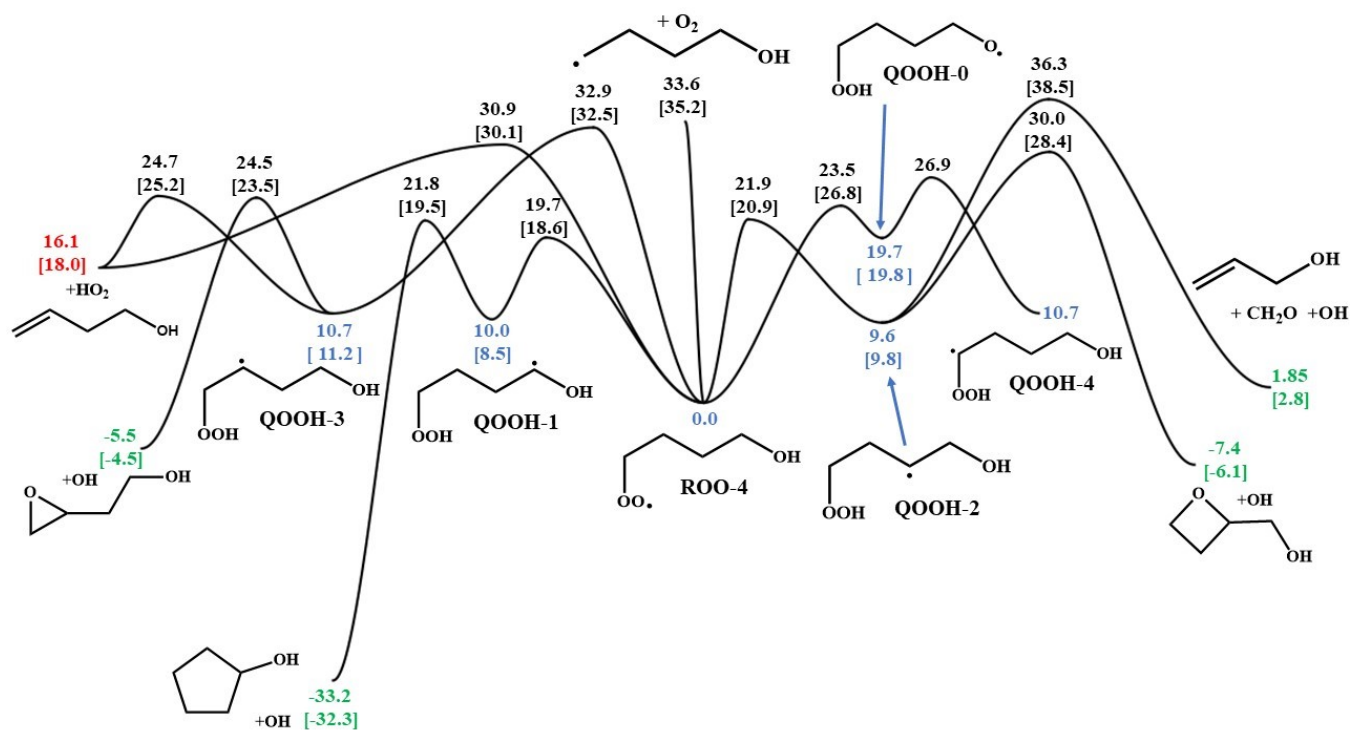

**Figure S5.** Potential energy surface for n-Butanol ROO4 calculated at CCSD(T)/cc-pV $\infty$ Z//M06-2X/cc-pVTZ level of theory. Energies are given in kcal/mol. QOOH energies are given in blue, HO<sub>2</sub> producing routes in red, OH producing rates in green.

**Table S7.** Calculated relative energies for n-Butanol ROO4 PES

| Species                                                                             | Relative energy (kcal/mol) |
|-------------------------------------------------------------------------------------|----------------------------|
| n-Butanol ROO4                                                                      | 0.0                        |
| QOOH-0                                                                              | 19.7                       |
| QOOH-1                                                                              | 10.0                       |
| QOOH-2                                                                              | 9.6                        |
| QOOH-3                                                                              | 10.7                       |
| QOOH-4                                                                              | 10.7                       |
| HO <sub>2</sub> + 3-Buten-1-ol                                                      | 16.1                       |
| O <sub>2</sub> + CH <sub>2</sub> CH <sub>2</sub> CH <sub>2</sub> CH <sub>2</sub> OH | 33.6                       |
| OH + THF-2-ol                                                                       | -33.2                      |
| OH + 2-Oxetanemethanol                                                              | -7.4                       |
| CH <sub>2</sub> O + OH + 2-Propen-1-ol                                              | 1.85                       |
| OH + Oxiraneethanol                                                                 | -5.5                       |
| n-Butanol ROO4 = QOOH-0                                                             | 23.5                       |
| n-Butanol ROO4 = QOOH-1                                                             | 19.7                       |
| n-Butanol ROO4 = QOOH-2                                                             | 21.9                       |
| n-Butanol ROO4 = QOOH-3                                                             | 32.9                       |

|                                                 |      |
|-------------------------------------------------|------|
| n-Butanol ROO4 = HO <sub>2</sub> + 3-Buten-1-ol | 30.9 |
| QOOH-0 = QOOH-4                                 | 26.9 |
| QOOH-1 = OH + THF-2ol                           | 21.8 |
| QOOH-2 = OH + 2-Oxetanemethanol                 | 30.0 |
| QOOH-2 = CH <sub>2</sub> O + OH + 2-Propen-1-ol | 36.3 |
| QOOH-3 = HO <sub>2</sub> + 3-Buten-1-ol         | 24.7 |
| QOOH-3 = OH + Oxiraneethanol                    | 24.5 |

**Table S8.** Optimized geometries and frequencies (m062x/cc-pVTZ) of relevant stationary points on the calculated n-Butanol ROO4 PES

| Species                                                                                             | Geometry   |            |            | Frequencies (cm <sup>-1</sup> ) |         |            |         |
|-----------------------------------------------------------------------------------------------------|------------|------------|------------|---------------------------------|---------|------------|---------|
| 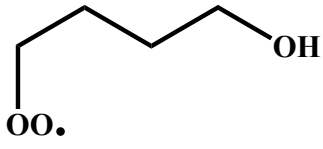<br>n-Butanol ROO4 | O          | -0.0130851 | 0.00629347 | 0.05977797                      | 259.90  | 284.87     | 375.39  |
|                                                                                                     | O          | 0.0023087  | 0.01475211 | 1.35613569                      | 481.09  | 589.77     | 751.65  |
|                                                                                                     | C          | 1.3528848  | 0.0037788  | 1.87355977                      | 849.03  | 896.72     | 969.27  |
|                                                                                                     | C          | 1.26874927 | 0.09887914 | 3.37712934                      | 991.21  | 1063.31    | 1101.03 |
|                                                                                                     | C          | 0.6697028  | 1.41722808 | 3.8539023                       | 1136.14 | 1149.87    | 1200.80 |
|                                                                                                     | C          | 0.63736811 | 1.51201332 | 5.36451086                      | 1236.75 | 1280.13    | 1292.80 |
|                                                                                                     | O          | 1.97477144 | 1.43921778 | 5.83126884                      | 1301.32 | 1338.53    | 1343.99 |
|                                                                                                     | H          | 1.97721894 | 1.47217723 | 6.78950011                      | 1401.76 | 1422.09    | 1458.64 |
|                                                                                                     | H          | 0.67700808 | -0.7389712 | 3.75469322                      | 1478.12 | 1491.69    | 1504.92 |
|                                                                                                     | H          | 2.27364492 | -0.0104187 | 3.78529941                      | 1532.76 | 3020.46    | 3054.47 |
|                                                                                                     | H          | 1.26227209 | 2.24960079 | 3.46599572                      | 3064.56 | 3073.87    | 3082.92 |
|                                                                                                     | H          | -0.344427  | 1.53069509 | 3.46783679                      | 3108.56 | 3128.89    | 3139.65 |
|                                                                                                     | H          | 1.87294437 | 0.85377788 | 1.43112666                      | 3905.22 |            |         |
|                                                                                                     | H          | 1.8176574  | -0.9212493 | 1.53509979                      | ! 46.95 | 69.55      | 118.32  |
| H                                                                                                   | 0.17082286 | 2.4536398  | 5.66832618 | 158.19                          | 226.14  | ! Torsions |         |
| H                                                                                                   | 0.03928357 | 0.68940853 | 5.77326874 |                                 |         |            |         |
| <br>QOOH-0       | O          | 0.02464409 | -0.0268757 | 0.00409709                      | 250.88  | 272.06     | 357.05  |
|                                                                                                     | C          | 0.01465634 | -0.0028538 | 1.4212582                       | 480.82  | 570.59     | 648.01  |
|                                                                                                     | C          | 1.46154597 | 0.0014534  | 1.86721264                      | 768.23  | 884.61     | 916.86  |
|                                                                                                     | C          | 2.21169375 | -1.2607669 | 1.46192344                      | 982.29  | 1041.52    | 1051.15 |
|                                                                                                     | C          | 3.627158   | -1.2774647 | 2.01825619                      | 1090.29 | 1117.99    | 1128.20 |
|                                                                                                     | O          | 3.70515265 | -1.2122584 | 3.38352606                      | 1196.24 | 1238.60    | 1263.15 |
|                                                                                                     | H          | 1.95997545 | 0.88117858 | 1.45135892                      | 1325.67 | 1331.15    | 1370.77 |
|                                                                                                     | H          | 1.4858798  | 0.10187306 | 2.95349702                      | 1383.12 | 1403.12    | 1410.75 |
|                                                                                                     | H          | 1.6797052  | -2.1398467 | 1.83407053                      | 1420.18 | 1480.31    | 1494.57 |
|                                                                                                     | H          | 2.2490366  | -1.3469369 | 0.37522351                      | 1530.83 | 2936.33    | 2999.93 |
|                                                                                                     | H          | -0.5095336 | -0.8880252 | 1.79071313                      | 3041.16 | 3056.02    | 3068.29 |
|                                                                                                     | H          | -0.5130997 | 0.88926415 | 1.77021959                      | 3088.96 | 3104.89    | 3123.82 |
|                                                                                                     | H          | 4.20763759 | -2.1399519 | 1.66102403                      | 3831.70 |            |         |
|                                                                                                     | H          | 4.19336709 | -0.3970266 | 1.66185334                      | ! 47.38 | 91.91      | 119.95  |
| O                                                                                                   | -1.3228200 | -0.1515247 | -0.4258104 | 157.42                          | 212.30  | !Torsions  |         |
| H                                                                                                   | -1.499442  | 0.73167175 | -0.7708975 |                                 |         |            |         |
| <br>QOOH-1       | O          | -0.0398211 | 0.09814278 | 0.11582629                      | 213.43  | 286.01     | 359.90  |
|                                                                                                     | C          | -0.0067455 | -0.0365094 | 1.52588128                      | 455.24  | 557.46     | 600.13  |
|                                                                                                     | C          | 1.45032801 | 0.02069187 | 1.93545128                      | 766.98  | 905.80     | 938.52  |
|                                                                                                     | C          | 2.27240649 | -1.1307811 | 1.36439255                      | 1035.66 | 1061.53    | 1089.37 |
|                                                                                                     | C          | 3.68283805 | -1.0859019 | 1.83092704                      | 1108.94 | 1125.07    | 1203.77 |
|                                                                                                     | O          | 4.59667722 | -1.9278614 | 1.2664951                       | 1229.19 | 1239.72    | 1282.00 |
|                                                                                                     | H          | 4.31383102 | -2.1505307 | 0.37483814                      | 1315.33 | 1346.59    | 1400.64 |
|                                                                                                     | H          | 1.88046989 | 0.97223503 | 1.61812759                      | 1404.23 | 1414.86    | 1454.32 |
|                                                                                                     | H          | 1.49325402 | -0.0015193 | 3.02661061                      | 1478.44 | 1490.98    | 1530.32 |

|                                                                                     |   |            |            |            |           |         |          |
|-------------------------------------------------------------------------------------|---|------------|------------|------------|-----------|---------|----------|
|                                                                                     | H | 1.79626345 | -2.0841225 | 1.64119609 | 2966.97   | 3040.80 | 3050.86  |
|                                                                                     | H | 2.24256058 | -1.085438  | 0.270869   | 3067.13   | 3086.33 | 3113.12  |
|                                                                                     | H | -0.4599554 | -0.9914156 | 1.80472375 | 3199.19   | 3830.70 | 3869.06  |
|                                                                                     | H | -0.5805373 | 0.7726055  | 1.98649359 | ! 73.14   | 80.24   | 94.43    |
|                                                                                     | H | 3.91481081 | -0.8709467 | 2.86548799 | 133.19    | 239.58  | 348.51   |
|                                                                                     | O | -1.3900528 | -0.0672799 | -0.291365  | !Torsions |         |          |
|                                                                                     | H | -1.6284625 | 0.8329373  | -0.5425581 |           |         |          |
| 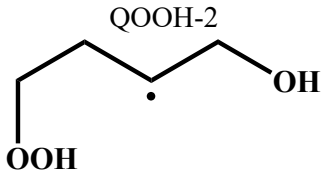   | O | 0.02104178 | -0.024847  | 3.048E-05  | 249.19    | 300.18  | 378.92   |
|                                                                                     | C | 0.01434769 | -0.0154919 | 1.41305806 | 435.39    | 567.46  | 579.85   |
|                                                                                     | C | 1.42010271 | 0.01052827 | 2.02267447 | 838.86    | 856.94  | 943.34   |
|                                                                                     | C | 2.27288848 | -1.1279928 | 1.58612474 | 972.68    | 997.06  | 1023.33  |
|                                                                                     | C | 3.30095691 | -0.9499383 | 0.52811635 | 1116.15   | 1128.49 | 1160.66  |
|                                                                                     | O | 2.74603918 | -0.4568918 | -0.7000024 | 1212.54   | 1250.65 | 1281.87  |
|                                                                                     | H | 1.97763139 | -1.0025206 | -0.9066919 | 1339.52   | 1367.23 | 1392.67  |
|                                                                                     | H | 1.89161707 | 0.95864004 | 1.75664866 | 1415.28   | 1425.67 | 1476.43  |
|                                                                                     | H | 1.29673134 | 0.00477898 | 3.10949824 | 1486.68   | 1489.59 | 1510.21  |
|                                                                                     | H | 2.08779398 | -2.114084  | 1.99014901 | 3048.46   | 3049.54 | 3063.93  |
|                                                                                     | H | -0.5032827 | -0.9391245 | 1.67804521 | 3092.52   | 3100.48 | 3120.66  |
|                                                                                     | H | -0.5685969 | 0.83792347 | 1.76602937 | 3200.51   | 3661.14 | 3824.51  |
|                                                                                     | H | 4.03369527 | -0.1933228 | 0.82168744 | ! 92.69   | 120.08  | 190.23   |
|                                                                                     | H | 3.83853084 | -1.8819385 | 0.34418645 | 223.58    | 469.90  | 633.69 ! |
|                                                                                     | O | 0.52852126 | 1.22956233 | -0.4352162 | Torsions  |         |          |
|                                                                                     | H | 1.45403165 | 0.99325796 | -0.6252546 |           |         |          |
|   | O | -0.0383301 | 0.03668115 | 0.00898374 | 281.89    | 288.95  | 383.14   |
|                                                                                     | C | 0.00033851 | 0.0038947  | 1.44240615 | 441.06    | 535.35  | 595.66   |
|                                                                                     | C | 1.38164164 | -0.0076368 | 1.99382155 | 834.42    | 855.87  | 918.51   |
|                                                                                     | C | 2.32622369 | 1.13002858 | 1.81227615 | 967.37    | 994.63  | 1060.69  |
|                                                                                     | C | 3.36088233 | 0.84719157 | 0.71518234 | 1092.11   | 1130.17 | 1156.86  |
|                                                                                     | O | 2.76011783 | 0.60215535 | -0.5473278 | 1206.79   | 1238.87 | 1306.53  |
|                                                                                     | H | 2.24267866 | -0.2104996 | -0.4859949 | 1334.63   | 1369.87 | 1393.58  |
|                                                                                     | H | 1.75798382 | -0.9207482 | 2.4376077  | 1415.44   | 1422.38 | 1473.63  |
|                                                                                     | H | 1.77797991 | 2.03892728 | 1.55994528 | 1479.73   | 1502.13 | 1518.44  |
|                                                                                     | H | 2.87791504 | 1.32008411 | 2.73830597 | 3041.34   | 3047.54 | 3055.93  |
|                                                                                     | H | -0.5306685 | -0.9114069 | 1.70169734 | 3106.84   | 3126.48 | 3127.55  |
|                                                                                     | H | -0.5755893 | 0.86100322 | 1.80136561 | 3186.34   | 3660.80 | 3814.06  |
|                                                                                     | H | 4.00937023 | 1.71101428 | 0.57949182 | !113.41   | 124.07  | 181.46   |
|                                                                                     | H | 3.98479347 | -0.0028298 | 1.00621103 | 205.52    | 507.51  | 624.45   |
|                                                                                     | O | 0.09018081 | 1.39104137 | -0.4059516 | !Torsions |         |          |
|                                                                                     | H | 1.02850182 | 1.42238974 | -0.6636588 |           |         |          |
|  | O | -0.1064605 | -0.1275668 | 0.07671376 | 278.19    | 292.88  | 365.81   |
|                                                                                     | C | -0.0273185 | -0.0585422 | 1.43602176 | 507.81    | 535.75  | 728.52   |
|                                                                                     | C | 1.2754078  | -0.0058849 | 2.16080863 | 790.28    | 872.31  | 916.50   |
|                                                                                     | C | 2.10596218 | -1.3019313 | 2.19762379 | 933.89    | 994.10  | 1066.37  |
|                                                                                     | C | 1.28290972 | -2.5647585 | 2.39233381 | 1086.34   | 1124.61 | 1179.62  |
|                                                                                     | O | 0.50315326 | -2.8940879 | 1.23945538 | 1235.59   | 1257.32 | 1299.09  |
|                                                                                     | H | 1.89868565 | 0.79727233 | 1.74990024 | 1366.61   | 1374.78 | 1394.14  |
|                                                                                     | H | 1.02948514 | 0.27849742 | 3.18558897 | 1417.36   | 1428.30 | 1460.43  |
|                                                                                     | H | 2.68516274 | -1.4024515 | 1.28069161 | 1497.33   | 1507.56 | 1524.53  |
|                                                                                     | H | 2.82325684 | -1.2312519 | 3.01804534 | 3016.41   | 3052.52 | 3074.35  |
|                                                                                     | H | -0.3590268 | -2.4781077 | 1.33940393 | 3090.90   | 3118.21 | 3129.73  |
|                                                                                     | H | -0.8833635 | 0.49534232 | 1.79779339 | 3204.04   | 3603.84 | 3848.41  |
|                                                                                     | H | 1.94259158 | -3.414112  | 2.56485158 | ! 100.27  | 147.62  | 173.56   |
|                                                                                     | H | 0.62997868 | -2.4665957 | 3.26415025 | 235.95    | 441.29  | 613.89 ! |
|                                                                                     | O | 1.04193304 | -0.7389758 | -0.4850704 | Torsions  |         |          |
|                                                                                     | H | 0.94328428 | -1.6634539 | -0.1842166 |           |         |          |

|                                                                                                                                                                                         |                                                                                                                                                                                                                                                                                                                                                                                                                                                                                                                                                                                                                                                               |                                                                                                                                                                                                                                                                                                                                                                                 |
|-----------------------------------------------------------------------------------------------------------------------------------------------------------------------------------------|---------------------------------------------------------------------------------------------------------------------------------------------------------------------------------------------------------------------------------------------------------------------------------------------------------------------------------------------------------------------------------------------------------------------------------------------------------------------------------------------------------------------------------------------------------------------------------------------------------------------------------------------------------------|---------------------------------------------------------------------------------------------------------------------------------------------------------------------------------------------------------------------------------------------------------------------------------------------------------------------------------------------------------------------------------|
| <p>HO<sub>2</sub> + 3-Buten-1-ol<br/>+HO<sub>2</sub></p> 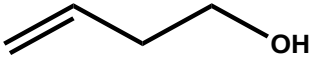                                              | <p>O 0.50553254 2.59512924 1.64024162<br/> O -0.1679742 2.44348437 0.50783059<br/> H -0.2367003 1.48037439 0.35008979<br/> C -0.0057061 0.02884186 -0.0078678<br/> C 0.00263284 -0.0200608 1.31699621<br/> C 1.24134282 -0.0098615 2.15775766<br/> C 1.54270448 -1.4143536 2.68326836<br/> O 1.82739126 -2.3159744 1.63744258<br/> H -0.9263513 -0.0222759 -0.5732051<br/> H 0.91543514 0.13962953 -0.5683053<br/> H -0.9386507 -0.1310315 1.84848231<br/> H 2.09312042 0.33063104 1.5671235<br/> H 1.12001114 0.66725427 3.00592175<br/> H 1.12489172 -2.2402529 0.98347102<br/> H 2.4263663 -1.3913679 3.31934447<br/> H 0.701864 -1.7694173 3.29102127</p> | <p>1161.48 1475.38 3553.10<br/> 286.62 434.83 450.48<br/> 680.08 858.08 895.61<br/> 978.94 993.88 1010.15<br/> 1052.50 1115.32 1168.54<br/> 1214.94 1259.79 1324.31<br/> 1350.40 1382.01 1429.52<br/> 1452.55 1484.24 1522.55<br/> 1731.52 3018.97 3066.19<br/> 3115.27 3119.65 3153.66<br/> 3162.54 3246.55 3843.12<br/> !90.62 169.52 387.54<br/> !Torsions</p>               |
| <p>O<sub>2</sub> + CH<sub>2</sub>CH<sub>2</sub>CH<sub>2</sub>CH<sub>2</sub>OH<br/>+ O<sub>2</sub></p>  | <p>O 0.0000000 0.0000000 0.00794919<br/> O 0.0000000 0.0000000 1.19781253<br/> O -0.0157085 -0.0454836 0.01723871<br/> C 0.00380591 -0.0054972 1.4339125<br/> C 1.417527 0.01273545 1.99448638<br/> C 2.21820165 -1.2307331 1.59863213<br/> C 1.69281399 -2.4717552 2.225826<br/> H 2.2099766 -1.328096 0.51224026<br/> H 3.26658164 -1.0772014 1.88696161<br/> H 1.36486258 0.08687766 3.08423476<br/> H 1.93030363 0.91295801 1.64256562<br/> H -0.5125723 -0.9092115 1.76006916<br/> H -0.561635 0.85493299 1.80527013<br/> H 0.39671117 0.75584465 -0.3145096<br/> H 1.41773886 -2.4735255 3.27157604<br/> H 1.71268876 -3.4183773 1.70937533</p>         | <p>1758.25<br/> 261.97 405.05 470.79<br/> 519.18 775.43 853.07<br/> 880.61 971.15 1011.87<br/> 1080.35 1114.44 1134.62<br/> 1182.15 1226.16 1302.87<br/> 1363.08 1374.81 1396.07<br/> 1424.74 1465.60 1475.09<br/> 1488.37 1515.93 2995.15<br/> 3034.36 3046.64 3080.19<br/> 3101.46 3109.42 3163.47<br/> 3270.19 3878.78<br/> ! 81.02 138.29 201.55<br/> 305.73 !Torsions</p>  |
| <p>OH + THF-2-ol<br/>+OH</p>                                                                         | <p>O 0.00000000 0.00000000 -0.00571069<br/> H 0.00000000 0.00000000 0.96571069<br/> C 0.00816229 -0.0011848 0.01204743<br/> O 0.01021311 -0.0193392 1.44441117<br/> C 1.33072775 -0.004553 1.91752801<br/> C 2.16458116 -0.6230945 0.81175024<br/> C 1.47545795 -0.0438799 -0.4252665<br/> H -0.5446259 -0.8776807 -0.3298246<br/> H -0.5072726 0.8924968 -0.3380839<br/> H 1.33702987 -0.5572262 2.85874334<br/> H 3.21416216 -0.3563014 0.89777679<br/> H 2.06158428 -1.7075157 0.8473418<br/> H 1.8469762 0.961033 -0.6139868<br/> H 1.62204483 -0.6441213 -1.3198357<br/> O 1.79068146 1.31102552 2.11348575<br/> H 1.15055035 1.76358306 2.67000414</p>  | <p>3776.00<br/> 77.98 198.57 419.52<br/> 512.71 634.03 787.46<br/> 870.86 878.78 943.02<br/> 956.44 963.06 1015.23<br/> 1054.12 1128.18 1160.55<br/> 1201.49 1214.01 1255.99<br/> 1266.18 1327.82 1348.71<br/> 1372.04 1409.74 1445.13<br/> 1484.50 1501.45 1539.18<br/> 3068.66 3081.11 3098.38<br/> 3104.36 3114.84 3155.35<br/> 3166.38 3875.36<br/> ! 314.06 ! Torsions</p> |
| <p>OH + 2-Oxetanemethanol</p>                                                                                                                                                           | <p>O 0.00000000 0.00000000 -0.00571069<br/> H 0.00000000 0.00000000 0.96571069</p>                                                                                                                                                                                                                                                                                                                                                                                                                                                                                                                                                                            | <p>3776.00</p>                                                                                                                                                                                                                                                                                                                                                                  |

|                                                                                                                                                                                  |                                                                                                                                                                                                                                                                                                                                                                                                                                                                                                                                                                                                                            |                                                                                                                                                                                                                                                                                                                                                |
|----------------------------------------------------------------------------------------------------------------------------------------------------------------------------------|----------------------------------------------------------------------------------------------------------------------------------------------------------------------------------------------------------------------------------------------------------------------------------------------------------------------------------------------------------------------------------------------------------------------------------------------------------------------------------------------------------------------------------------------------------------------------------------------------------------------------|------------------------------------------------------------------------------------------------------------------------------------------------------------------------------------------------------------------------------------------------------------------------------------------------------------------------------------------------|
| 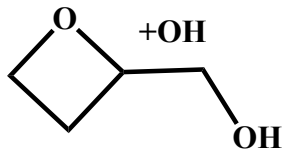                                                                                                | O 0.01729099 0.09418816 0.03889921<br>C 0.01294046 0.05392339 1.44599647<br>C 1.42289723 -0.058538 1.97348474<br>O 2.1944882 1.07727223 1.52470555<br>C 1.62799283 0.32220045 3.4451704<br>C 2.32085759 1.56696057 2.871867<br>H 3.36513036 1.70583709 3.14963112<br>H 1.78088468 2.50458691 3.01131355<br>H 0.6484262 0.77688137 -0.2141286<br>H -0.4546666 0.95342704 1.86760298<br>H -0.5770104 -0.8119478 1.75022915<br>H 1.88114855 -0.990674 1.63902836<br>H 0.71620687 0.49872574 4.01113018<br>H 2.28238865 -0.3428488 3.9997329                                                                                   | 73.95 235.30 391.41<br>507.01 778.44 786.72<br>891.81 920.57 984.23<br>1022.86 1074.63 1098.29<br>1133.85 1158.50 1185.74<br>1217.49 1235.81 1265.62<br>1300.40 1343.39 1371.83<br>1397.73 1444.51 1495.77<br>1505.15 1540.55 3009.12<br>3067.71 3085.35 3107.16<br>3112.68 3116.91 3172.50<br>3842.64<br>! 135.48 442.69 !Torsions            |
| $\text{CH}_2\text{O} + \text{OH} +$<br>2-Propen-1-ol<br><br>$+ \text{CH}_2\text{O} + \text{OH}$ | O 0.00000000 0.00000000 -0.00571069<br>H 0.00000000 0.00000000 0.96571069<br>O 1.75214387 -0.7145028 0.73740505<br>C 1.58204252 -0.4681554 -0.4198612<br>H 1.92664152 0.47856444 -0.870535<br>H 1.07176408 -1.1748522 -1.0968368<br>C -0.0004217 -0.0002202 -0.0004019<br>C -5.909E-05 0.00030874 1.49945498<br>C 1.09008346 0.00027396 2.24896454<br>O 1.27818412 0.1238833 -0.5764257<br>H -0.4086313 -0.9456428 -0.3640804<br>H -0.674537 0.78741572 -0.3584569<br>H -0.9807471 0.00565347 1.96449649<br>H 1.03126243 0.00823147 3.32808457<br>H 2.07549285 -0.0272614 1.80209603<br>H 1.66177723 0.95253574 -0.2765586 | 3776.00<br>1218.60 1279.77 1546.46<br>1877.08 2943.66 3014.59<br>298.67 346.97 583.42<br>621.43 904.96 971.41<br>1003.02 1030.14 1052.03<br>1162.15 1224.07 1320.44<br>1382.30 1421.27 1449.20<br>1503.79 1739.63 3019.80<br>3086.64 3167.25 3179.27<br>3260.43 3869.53<br>! 199.8541 346.9718 !Torsions                                       |
| OH + Oxiraneethanol<br>                                                                       | O 0.00000000 0.00000000 -0.00571069<br>H 0.00000000 0.00000000 0.96571069<br>O -0.0161659 0.05500447 0.02027366<br>C 0.01372416 0.00237712 1.43843015<br>C 1.2566078 0.01099717 0.66567049<br>C 2.10946765 1.23984057 0.51650521<br>C 2.50749579 1.46341828 -0.9385673<br>O 1.41550286 1.87510826 -1.7297556<br>H 0.65618725 1.32816116 -1.5025392<br>H 1.76716602 -0.9374901 0.52532892<br>H 1.56209406 2.11687007 0.86711725<br>H 3.00247223 1.1268698 1.13479366<br>H -0.350445 -0.9235414 1.86556452<br>H -0.2958442 0.91297212 1.9377506<br>H 3.25475097 2.25378374 -1.003621<br>H 2.96151369 0.547849 -1.339243      | 3776.00<br>243.59 372.40 402.01<br>533.05 794.14 873.02<br>906.01 956.93 980.27<br>1031.81 1109.26 1130.62<br>1161.74 1166.98 1183.99<br>1241.43 1259.51 1309.05<br>1352.46 1386.32 1448.12<br>1454.23 1476.40 1525.93<br>1544.54 3007.76 3067.44<br>3108.70 3114.89 3131.63<br>3143.47 3225.64 3846.96<br>! 78.08 173.72 445.42 !<br>Torsions |
| n-Butanol ROO4 = QOOH-0                                                                                                                                                          | C -0.0162700 -0.0028148 -0.0158818<br>C 0.01732763 0.05530325 1.51123333<br>H 1.01887131 -0.0186419 -0.3632714<br>H 0.04955386 -0.9508995 1.95633965<br>H -0.4698611 -0.9468507 -0.3234873                                                                                                                                                                                                                                                                                                                                                                                                                                 | 1231.96i 67.35 204.36<br>260.43 287.14 297.68<br>462.88 476.24 510.24<br>610.98 738.81 818.21<br>846.62 900.71 930.77                                                                                                                                                                                                                          |

|                         |   |            |            |            |          |          |          |
|-------------------------|---|------------|------------|------------|----------|----------|----------|
|                         | H | -0.9226945 | 0.49223703 | 1.90195261 | 967.62   | 1004.49  | 1080.94  |
|                         | C | -0.3519293 | 2.53060366 | -0.232523  | 1121.63  | 1134.92  | 1197.09  |
|                         | H | 0.7283697  | 2.66501444 | -0.2753598 | 1224.98  | 1271.40  | 1291.05  |
|                         | H | -0.8282996 | 3.29503439 | -0.8489085 | 1303.91  | 1373.07  | 1375.25  |
|                         | C | -0.7805958 | 1.14189472 | -0.6790014 | 1389.71  | 1398.13  | 1403.00  |
|                         | H | -1.8488982 | 1.04277584 | -0.4729195 | 1475.12  | 1483.45  | 1497.62  |
|                         | H | -0.6640762 | 1.08194129 | -1.7627933 | 1660.82  | 2906.79  | 2977.61  |
|                         | O | -0.7795534 | 2.75439075 | 1.11508593 | 3062.25  | 3065.61  | 3070.63  |
|                         | O | 0.29751401 | 3.00893674 | 1.93862719 | 3102.37  | 3112.87  | 3132.61  |
|                         | H | 0.78374697 | 2.07369055 | 2.02346751 |          |          |          |
|                         | O | 1.06730258 | 0.76002457 | 2.0375091  |          |          |          |
| n-Butanol ROO4 = QOOH-1 | C | 0.00916285 | -0.0040599 | 0.0146658  | 1895.07i | 86.08    | 159.95   |
|                         | C | 0.00890337 | -0.0009137 | 1.52907232 | 263.34   | 315.66   | 356.42   |
|                         | C | 1.43916137 | -0.0034619 | 2.07554152 | 410.54   | 459.38   | 568.73   |
|                         | C | 2.02350205 | 1.40812304 | 2.13036711 | 618.42   | 793.94   | 871.51   |
|                         | O | 1.5562046  | 2.2247296  | 1.06615171 | 916.91   | 948.65   | 1009.47  |
|                         | O | 1.89973437 | 1.63018444 | -0.1334719 | 1057.28  | 1097.56  | 1111.11  |
|                         | H | 0.96640605 | 0.81928554 | -0.275953  | 1128.47  | 1185.63  | 1220.76  |
|                         | H | -0.5502505 | -0.8702638 | 1.8835903  | 1251.17  | 1267.98  | 1301.94  |
|                         | H | 1.47011257 | -0.4281057 | 3.07856783 | 1312.97  | 1356.48  | 1393.37  |
|                         | H | 2.06294364 | -0.6381503 | 1.44436201 | 1402.96  | 1430.66  | 1478.20  |
|                         | H | 0.35702004 | -0.9375156 | -0.4274314 | 1491.88  | 1502.76  | 1522.64  |
|                         | H | 1.67940969 | 1.93437776 | 3.02194696 | 3046.67  | 3067.06  | 3076.84  |
|                         | H | -0.5208300 | 0.88786495 | 1.88448409 | 3088.68  | 3113.29  | 3115.98  |
|                         | O | -1.1608733 | 0.37247109 | -0.6008337 | 3129.48  | 3857.39  |          |
|                         | H | -1.5059603 | 1.15902324 | -0.1663564 | !        | 396.69 ! | Torsions |
|                         | H | 3.11480742 | 1.38771585 | 2.12560654 |          |          |          |
| n-Butanol ROO4 = QOOH-2 | C | 0.02115178 | -0.0148928 | -0.0017448 | 1826.48i | 104.66   | 182.65   |
|                         | C | 0.0124551  | 0.02503675 | 1.50571697 | 277.85   | 380.06   | 475.38   |
|                         | C | 1.43579848 | -0.0195427 | 2.09384408 | 512.22   | 550.67   | 685.50   |
|                         | H | -0.4587673 | 0.94839917 | 1.85699795 | 812.61   | 850.27   | 874.89   |
|                         | H | -0.5474767 | -0.820794  | 1.90037925 | 952.01   | 975.70   | 1028.65  |
|                         | H | 1.95651152 | 0.92251368 | 1.92537597 | 1062.05  | 1111.92  | 1117.88  |
|                         | O | 2.14928085 | -1.0799093 | 1.49112321 | 1147.03  | 1195.64  | 1232.21  |
|                         | O | 2.35487329 | -0.7472467 | 0.16230871 | 1253.08  | 1280.77  | 1340.95  |
|                         | H | 1.22436903 | -0.5877314 | -0.1909243 | 1354.65  | 1380.26  | 1403.00  |
|                         | H | -0.6777932 | -0.7111893 | -0.4583958 | 1423.87  | 1466.23  | 1499.70  |
|                         | H | 1.41611771 | -0.2515893 | 3.15728177 | 1507.22  | 1568.97  | 3030.98  |
|                         | C | 0.1481352  | 1.2968647  | -0.7313902 | 3047.59  | 3064.74  | 3092.26  |
|                         | H | -0.7581007 | 1.89170575 | -0.5792816 | 3124.24  | 3146.46  | 3155.27  |
|                         | H | 0.24217559 | 1.12166269 | -1.8078373 | 3836.91  |          |          |
|                         | O | 1.21472032 | 2.08647137 | -0.2453551 | !        | 164.39   | 434.33 ! |
|                         | H | 2.02251214 | 1.56571207 | -0.3139752 |          |          |          |
| n-Butanol ROO4 = QOOH-3 | H | -0.0023204 | 0.03255345 | -0.0053347 | 2173.87i | 125.76   | 261.67   |
|                         | O | -0.0082942 | 0.05234675 | 1.24906028 | 315.58   | 390.61   | 532.34   |
|                         | O | 1.38262626 | 0.02014996 | 1.35077217 | 560.25   | 674.93   | 765.79   |
|                         | C | 1.75641466 | -0.8459716 | 0.29119252 | 871.77   | 899.74   | 957.26   |
|                         | H | 1.53232844 | -1.882481  | 0.55466154 | 978.44   | 1024.66  | 1055.50  |
|                         | C | 0.8983419  | -0.3854763 | -0.8844799 | 1083.37  | 1130.26  | 1147.94  |
|                         | H | 1.24187331 | 0.53980703 | -1.3423364 | 1218.00  | 1227.05  | 1244.89  |
|                         | H | 2.82917551 | -0.7252902 | 0.14292914 | 1266.36  | 1321.12  | 1379.18  |
|                         | C | 0.29804717 | -1.3843522 | -1.829278  | 1395.95  | 1409.97  | 1428.56  |
|                         | C | -0.4777093 | -2.5091583 | -1.1427125 | 1455.62  | 1504.06  | 1527.59  |
|                         | H | 1.08992867 | -1.8302797 | -2.4456168 | 1735.20  | 3014.31  | 3040.32  |
|                         | H | -0.3708043 | -0.8624053 | -2.515311  | 3067.28  | 3098.21  | 3119.01  |



|                                                 |   |            |            |            |           |         |                   |
|-------------------------------------------------|---|------------|------------|------------|-----------|---------|-------------------|
|                                                 | H | -0.9420301 | -3.1313162 | -1.9066881 | 3125.25   | 3139.55 | 3823.03           |
|                                                 | H | 0.19880803 | -3.1557706 | -0.5752309 | !         | 63.52   | 206.62 490.84     |
|                                                 | O | -1.5226049 | -2.0266409 | -0.3300617 | !Torsions |         |                   |
|                                                 | H | -1.1529308 | -1.6405729 | 0.47208236 |           |         |                   |
| n-Butanol ROO4 = HO <sub>2</sub> + 3-Buten-1-ol | C | -0.0131762 | 0.00593394 | -0.0162    | 1083.85i  | 122.82  | 203.69            |
|                                                 | C | 0.05155562 | -0.0148193 | 1.37151615 | 320.09    | 398.53  | 477.17            |
|                                                 | O | 2.06114037 | -0.0290737 | 1.6429523  | 485.54    | 584.60  | 701.94            |
|                                                 | O | 2.47237664 | 0.03590718 | 0.46056298 | 821.57    | 848.27  | 879.20            |
|                                                 | H | 1.32964956 | 0.0677524  | -0.1023721 | 960.89    | 1011.18 | 1016.25           |
|                                                 | H | -0.2870913 | 0.95145342 | -0.4790631 | 1093.63   | 1109.51 | 1156.66           |
|                                                 | H | -0.0635567 | -0.9434443 | 1.91553593 | 1213.42   | 1263.04 | 1266.23           |
|                                                 | C | -0.3889083 | -1.2436637 | -0.7886382 | 1291.81   | 1366.77 | 1389.15           |
|                                                 | H | 0.05936789 | -1.2294409 | -1.7840569 | 1416.35   | 1419.90 | 1439.48           |
|                                                 | H | 0.00297881 | -2.1203218 | -0.2679899 | 1479.30   | 1515.87 | 1580.02           |
|                                                 | H | -0.0592376 | 0.88834965 | 1.95538753 | 1658.31   | 3023.76 | 3062.93           |
|                                                 | C | -1.8992626 | -1.3957648 | -0.9367117 | 3106.54   | 3117.68 | 3136.51           |
|                                                 | H | -2.3002447 | -0.5574341 | -1.5179685 | 3168.16   | 3255.77 | 3871.26           |
|                                                 | H | -2.1277412 | -2.3130263 | -1.4780383 | !         | 65.22   | 134.00 262.80     |
|                                                 | O | -2.5560537 | -1.5031942 | 0.30897885 | !Torsions |         |                   |
|                                                 | H | -2.4291345 | -0.6787665 | 0.78619386 |           |         |                   |
| QOOH-0 = QOOH-4                                 | O | 0.01977475 | -0.0079464 | 0.01009262 | 1163.85i  | 118.52  | 180.76            |
|                                                 | C | -0.0104246 | -0.0279879 | 1.39380167 | 305.32    | 342.65  | 481.38            |
|                                                 | C | 1.31140155 | -0.0141601 | 2.13959793 | 523.74    | 532.58  | 751.02            |
|                                                 | C | 1.91108261 | -1.4102218 | 2.33115744 | 807.04    | 876.24  | 901.15            |
|                                                 | C | 0.81842641 | -2.3905859 | 2.76589    | 945.59    | 985.85  | 1051.98           |
|                                                 | O | -0.2390943 | -2.4332775 | 1.85520144 | 1069.27   | 1104.62 | 1131.46           |
|                                                 | H | 2.0074595  | 0.63547025 | 1.6050363  | 1176.43   | 1210.19 | 1237.64           |
|                                                 | H | 1.12367006 | 0.43133749 | 3.11835884 | 1279.59   | 1339.29 | 1359.24           |
|                                                 | H | 2.35934092 | -1.7543134 | 1.40139545 | 1364.19   | 1386.72 | 1419.96           |
|                                                 | H | 2.69129274 | -1.385654  | 3.09267222 | 1462.27   | 1484.22 | 1495.75           |
|                                                 | H | -0.4947391 | -1.0993495 | 1.7060766  | 1503.69   | 1617.34 | 3002.08           |
|                                                 | H | -0.7078232 | 0.75919352 | 1.67621948 | 3044.18   | 3063.24 | 3089.97           |
|                                                 | H | 1.23757828 | -3.4029582 | 2.80110772 | 3109.35   | 3131.60 | 3146.49           |
|                                                 | H | 0.46135944 | -2.1400956 | 3.77276518 | 3679.76   |         |                   |
|                                                 | O | 0.87688535 | -1.0368471 | -0.4575483 | !         | 202.49  | 420.37 ! Torsions |
|                                                 | H | 0.43603949 | -1.8367398 | -0.1185141 |           |         |                   |
| QOOH-1 = OH + THF-2ol                           | C | 0.07971896 | -0.0234601 | 0.01587591 | 941.05i   | 76.01   | 116.92            |
|                                                 | C | 0.0088284  | -0.0233529 | 1.49491269 | 224.44    | 278.54  | 297.49            |
|                                                 | C | 1.44647441 | 0.01578411 | 2.00165377 | 361.63    | 433.58  | 464.04            |
|                                                 | C | 2.1982644  | -1.1271746 | 1.3379374  | 552.66    | 741.75  | 863.01            |
|                                                 | H | -0.5755922 | 0.81750696 | 1.88212629 | 903.37    | 935.91  | 961.13            |
|                                                 | H | -0.4845469 | -0.9446876 | 1.81053965 | 1042.42   | 1087.75 | 1110.77           |
|                                                 | H | 1.90840914 | 0.96408182 | 1.71956361 | 1123.52   | 1195.79 | 1229.50           |
|                                                 | H | 1.50149436 | -0.0709448 | 3.0872309  | 1249.56   | 1277.73 | 1305.89           |
|                                                 | H | 0.47900572 | 0.83412378 | -0.5109601 | 1334.50   | 1371.96 | 1393.50           |
|                                                 | H | 3.2731772  | -1.0234039 | 1.47851387 | 1469.00   | 1486.57 | 1514.51           |
|                                                 | H | 1.88476643 | -2.0900601 | 1.75397224 | 1526.83   | 3034.60 | 3038.29           |
|                                                 | O | -0.8364247 | -0.7745037 | -0.6311407 | 3068.80   | 3100.74 | 3115.07           |
|                                                 | H | -0.7066406 | -0.7017717 | -1.5803821 | 3123.19   | 3182.80 | 3860.99           |
|                                                 | O | 1.91342465 | -1.097337  | -0.055751  | 3884.25   |         |                   |
|                                                 | O | 3.09490907 | -2.084277  | -0.6248571 | !         | 171.52  | 394.10 ! Torsions |
|                                                 | H | 2.50671411 | -2.7042522 | -1.0702372 |           |         |                   |
| QOOH-2 = OH + 2-Oxetanemethanol                 | C | 0.0330003  | -0.0156664 | -0.015213  | 1077.93i  | 72.35   | 95.25             |
|                                                 | C | 0.09883016 | 0.02618678 | 1.48627568 | 252.68    | 261.56  | 306.55            |

|                                                    |   |            |            |            |           |           |           |
|----------------------------------------------------|---|------------|------------|------------|-----------|-----------|-----------|
|                                                    | H | 0.94278836 | 0.08055206 | -0.5914036 | 419.37    | 572.13    | 634.67    |
|                                                    | C | -0.1222686 | -1.4612158 | 1.75083465 | 743.23    | 834.27    | 902.63    |
|                                                    | H | 1.06401497 | 0.37601305 | 1.84373347 | 952.51    | 1002.78   | 1034.38   |
|                                                    | H | -0.6922256 | 0.64531828 | 1.9072578  | 1049.77   | 1126.62   | 1131.67   |
|                                                    | H | 0.68391382 | -1.958489  | 2.28738802 | 1157.77   | 1208.07   | 1220.71   |
|                                                    | O | -0.1571127 | -1.9278317 | 0.38840553 | 1248.37   | 1291.64   | 1354.28   |
|                                                    | O | -0.6018933 | -3.5052862 | 0.6396386  | 1377.51   | 1405.14   | 1423.47   |
|                                                    | H | -0.0760901 | -3.8756675 | -0.0784929 | 1486.42   | 1488.66   | 1531.37   |
|                                                    | H | -1.0734024 | -1.6867499 | 2.23231977 | 3018.65   | 3049.87   | 3081.29   |
|                                                    | C | -1.2543912 | 0.25666177 | -0.7129983 | 3093.37   | 3130.65   | 3154.45   |
|                                                    | H | -1.4266603 | 1.33816632 | -0.7651552 | 3208.52   | 3816.10   | 3862.29   |
|                                                    | H | -1.196612  | -0.1114791 | -1.7431181 | ! 150.64  | 204.00    | 514.54    |
|                                                    | O | -2.3602845 | -0.2866593 | -0.0298608 | !Torsions |           |           |
|                                                    | H | -2.1946328 | -1.2343139 | 0.04811537 |           |           |           |
| QOOH-2 = CH <sub>2</sub> O + OH +<br>2-Propen-1-ol | O | -0.0263675 | -0.0565191 | -0.0105816 | 470.47i   | 73.77     | 143.63    |
|                                                    | C | 0.01465276 | 0.06823669 | 1.42190459 | 191.58    | 284.80    | 382.68    |
|                                                    | C | 1.43427777 | 0.02099158 | 1.86219966 | 465.06    | 480.73    | 572.73    |
|                                                    | H | 1.98816016 | -0.8749144 | 1.60854773 | 727.96    | 867.79    | 911.84    |
|                                                    | C | 2.05122304 | 1.06479337 | 2.45967516 | 963.90    | 967.13    | 979.78    |
|                                                    | C | 2.84627114 | 2.46404387 | 0.87018827 | 1004.91   | 1054.56   | 1156.49   |
|                                                    | O | 1.87933448 | 2.52175404 | -0.0761162 | 1212.70   | 1234.49   | 1241.72   |
|                                                    | O | 2.05544885 | 1.44074911 | -0.9757914 | 1278.69   | 1291.87   | 1408.70   |
|                                                    | H | -0.9376756 | -0.0178581 | -0.3113092 | 1451.27   | 1460.86   | 1515.46   |
|                                                    | H | -0.4399427 | 1.01299476 | 1.73015452 | 1530.87   | 1608.20   | 3030.94   |
|                                                    | H | -0.5579622 | -0.7566309 | 1.85753752 | 3080.26   | 3123.77   | 3153.49   |
|                                                    | H | 1.4639414  | 1.89756786 | 2.8269319  | 3189.09   | 3241.92   | 3255.12   |
|                                                    | H | 3.03955384 | 0.95188767 | 2.88433386 | 3508.75   | 3883.09   |           |
|                                                    | H | 2.90455955 | 3.40108252 | 1.41108871 | ! 93.52   | 246.54    | 298.22    |
|                                                    | H | 3.75941647 | 1.96697156 | 0.57060209 | 689.62    | !Torsions |           |
|                                                    | H | 1.30166092 | 0.86660033 | -0.7235423 |           |           |           |
| QOOH-3 = HO <sub>2</sub> + 3-<br>Buten-1-ol        | O | -0.0304979 | 0.0582797  | 0.00595778 | 702.17i   | 203.21    | 275.08    |
|                                                    | C | 0.00635944 | -0.021568  | 1.91149104 | 324.87    | 353.53    | 432.33    |
|                                                    | C | 1.3484798  | -0.0026922 | 2.1849056  | 506.22    | 733.88    | 859.45    |
|                                                    | C | 2.18338481 | 1.23123875 | 2.1143104  | 887.54    | 945.19    | 987.39    |
|                                                    | C | 3.22684799 | 1.12500338 | 0.9984461  | 1010.08   | 1033.35   | 1093.44   |
|                                                    | O | 2.64124923 | 0.93808968 | -0.2786025 | 1106.37   | 1165.47   | 1220.48   |
|                                                    | H | 2.11245861 | 0.12831811 | -0.2559268 | 1251.65   | 1283.59   | 1341.02   |
|                                                    | H | 1.87436303 | -0.9454755 | 2.30149142 | 1396.92   | 1423.51   | 1445.36   |
|                                                    | H | 1.5482189  | 2.10203326 | 1.9421066  | 1475.94   | 1512.66   | 1522.52   |
|                                                    | H | 2.71819407 | 1.39049666 | 3.05620402 | 1569.11   | 3038.29   | 3043.43   |
|                                                    | H | -0.5482694 | -0.9439077 | 2.01100805 | 3103.04   | 3127.83   | 3158.32   |
|                                                    | H | -0.5711978 | 0.89016419 | 1.97830547 | 3170.14   | 3259.43   | 3634.88   |
|                                                    | H | 3.80581837 | 2.04474471 | 0.93842945 | 3776.23   |           |           |
|                                                    | H | 3.91902687 | 0.30602813 | 1.21906167 | ! 97.97   | 170.61    | 179.55    |
|                                                    | O | -0.1049556 | 1.38517425 | -0.3318465 | 573.60    | 659.85    | !Torsions |
|                                                    | H | 0.82188345 | 1.61272506 | -0.5296646 |           |           |           |
| QOOH-3 = OH +<br>Oxiraneethanol                    | O | 0.24522865 | -0.2904877 | 0.07490023 | 955.78i   | 83.25     | 260.94    |
|                                                    | C | 0.03462535 | 0.0787164  | 1.40595562 | 278.28    | 315.69    | 364.04    |
|                                                    | C | 1.49512185 | -0.0516918 | 1.50706602 | 427.34    | 533.37    | 697.21    |
|                                                    | C | 2.38450874 | 1.10828436 | 1.24417947 | 830.78    | 872.75    | 951.41    |
|                                                    | C | 2.21164635 | 1.75093142 | -0.1491776 | 987.75    | 1022.01   | 1079.53   |
|                                                    | O | 0.96889382 | 2.3796171  | -0.3214347 | 1100.44   | 1143.29   | 1195.22   |
|                                                    | H | 0.32330149 | 1.72907569 | -0.6301766 | 1202.25   | 1212.46   | 1285.24   |
|                                                    | H | 1.90711771 | -1.0308482 | 1.69888422 | 1319.36   | 1333.48   | 1404.26   |
|                                                    | H | 2.17491867 | 1.89230438 | 1.9796051  | 1415.03   | 1437.34   | 1477.66   |

|  |   |            |            |            |         |            |               |
|--|---|------------|------------|------------|---------|------------|---------------|
|  | H | 3.42735206 | 0.81209467 | 1.35828319 | 1507.85 | 1530.90    | 3038.37       |
|  | H | -0.574849  | -0.6333287 | 1.96007312 | 3059.97 | 3078.59    | 3110.76       |
|  | H | -0.3299534 | 1.10163298 | 1.50108496 | 3115.41 | 3143.52    | 3230.43       |
|  | H | 2.97696491 | 2.52131388 | -0.2500444 | 3771.86 | 3849.70    |               |
|  | H | 2.38725792 | 0.99226007 | -0.9149287 | !       | 119.83     | 209.55 236.54 |
|  | O | -1.1220467 | 0.21068205 | -0.8080901 | 660.12  | ! Torsions |               |
|  | H | -1.0025588 | -0.4229549 | -1.5266772 |         |            |               |

**D) Detailed potential energy surfaces, energetics, geometries, and frequencies for species in the low temperature oxidation chemistry of n-pentanol ROO and QOOH radicals originating from fuel radical + O<sub>2</sub>**

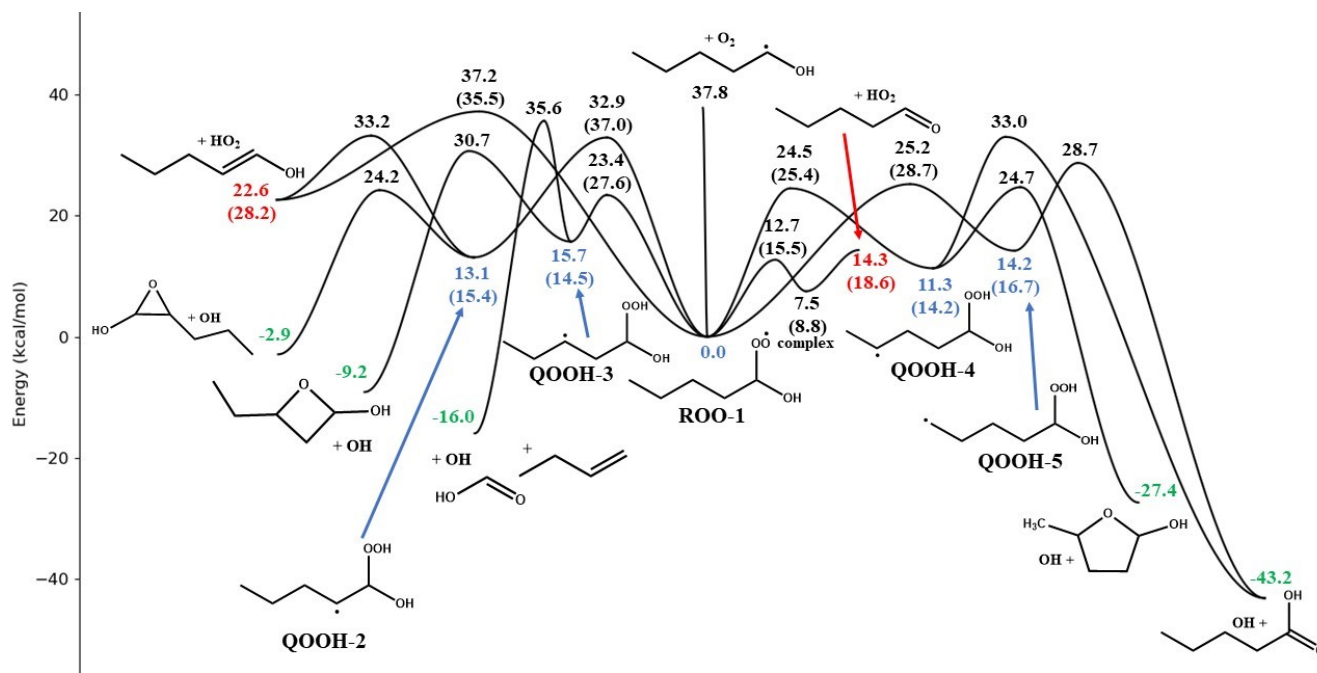

**Figure S6.** Potential energy surface for n-Pentanol ROO1 calculated at CCSD(T)/cc-pV $\infty$ Z//M06-2X/cc-pVTZ level of theory. Energies are given in kcal/mol. QOOH energies are given in blue, HO<sub>2</sub> producing routes in red, OH producing rates in green.

**Table S9.** Calculated relative energies for n-Pentanol ROO1 PES

| Species                                                                               | Relative energy (kcal/mol) |
|---------------------------------------------------------------------------------------|----------------------------|
| n-Pentanol ROO1                                                                       | 0.0                        |
| QOOH-2                                                                                | 13.1                       |
| QOOH-3                                                                                | 15.7                       |
| QOOH-4                                                                                | 11.3                       |
| QOOH-5                                                                                | 14.2                       |
| HO <sub>2</sub> Pentanal complex                                                      | 7.5                        |
| HO <sub>2</sub> + Pentanal                                                            | 14.3                       |
| HO <sub>2</sub> + 1-Penten-1-ol                                                       | 22.6                       |
| O <sub>2</sub> + CH <sub>3</sub> CH <sub>2</sub> CH <sub>2</sub> CH <sub>2</sub> CHOH | 37.8                       |
| OH + 3-propyloxiran-2-ol                                                              | -2.9                       |
| OH + 4-ethyloxetan-2-ol                                                               | -9.2                       |
| OH + Formic acid +1-Butene                                                            | -16.0                      |
| OH+ 5-methylTHF-2ol                                                                   | -27.4                      |
| OH + Pentanoic Acid                                                                   | -43.2                      |

|                                                   |      |
|---------------------------------------------------|------|
| n-Pentanol ROO1= QOOH-2                           | 32.9 |
| n-Pentanol ROO1= QOOH-3                           | 23.4 |
| n-Pentanol ROO1= QOOH-4                           | 24.5 |
| n-Pentanol ROO1= QOOH-5                           | 25.2 |
| n-Pentanol ROO1= HO <sub>2</sub> Pentanal complex | 12.7 |
| n-Pentanol ROO1= HO <sub>2</sub> + 1-Penten-1-ol  | 37.2 |
| QOOH-2 = OH + 3-propyloxiran-2-ol                 | 24.2 |
| QOOH-2 = HO <sub>2</sub> + 1-Penten-1-ol          | 33.2 |
| QOOH-3 = OH + 4-ethyloxetan-2-ol                  | 30.7 |
| QOOH-3 = OH + Formic acid +1-Butene               | 35.6 |
| QOOH-4 = OH+ 5-methylTHF-2ol                      | 24.7 |
| QOOH-4 = OH + Pentanoic Acid                      | 33.0 |
| QOOH-5 = OH + Pentanoic Acid                      | 28.7 |

**Table S10.** Optimized geometries and frequencies (m062x/cc-pVTZ) of relevant stationary points on the calculated n-Pentanol ROO1 PES

| Species                                                                                               | Geometry |              |            | Frequencies (cm <sup>-1</sup> ) |           |         |         |
|-------------------------------------------------------------------------------------------------------|----------|--------------|------------|---------------------------------|-----------|---------|---------|
| 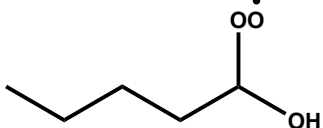<br>n-Pentanol ROO1 | C        | 3.2004E-06   | -9.365E-05 | -1.547E-05                      | 102.34    | 266.08  | 305.34  |
|                                                                                                       | C        | 6.88907E-05  | 0.00020074 | 1.52347904                      | 363.14    | 454.06  | 551.82  |
|                                                                                                       | C        | 1.408302143  | 2.5291E-05 | 2.10426175                      | 644.07    | 741.10  | 804.85  |
|                                                                                                       | C        | 1.394814927  | -0.0029003 | 3.60777463                      | 898.70    | 929.54  | 949.72  |
|                                                                                                       | O        | 0.874620953  | -1.1827784 | 4.08358881                      | 1011.93   | 1050.85 | 1091.22 |
|                                                                                                       | O        | 2.789634907  | 0.13134737 | 4.03804421                      | 1120.42   | 1149.65 | 1205.69 |
|                                                                                                       | O        | 2.865998907  | 0.05541531 | 5.32940258                      | 1233.57   | 1275.29 | 1296.73 |
|                                                                                                       | H        | 0.546736497  | -0.8763037 | -0.3570209                      | 1301.11   | 1334.74 | 1338.88 |
|                                                                                                       | H        | 1.957673143  | -0.8849839 | 1.77632044                      | 1352.94   | 1387.09 | 1415.89 |
|                                                                                                       | H        | 1.962010835  | 0.8788074  | 1.76818049                      | 1417.04   | 1478.57 | 1492.06 |
|                                                                                                       | H        | 0.88956778   | 0.87084003 | 4.03113256                      | 1493.67   | 1503.29 | 1504.55 |
|                                                                                                       | H        | 0.901490944  | -1.1540221 | 5.04657176                      | 1516.01   | 3042.87 | 3053.17 |
|                                                                                                       | H        | -0.544264075 | 0.87842914 | 1.88464374                      | 3057.04   | 3060.19 | 3071.11 |
|                                                                                                       | H        | -0.539497313 | -0.8743362 | 1.89215327                      | 3079.91   | 3099.72 | 3122.85 |
|                                                                                                       | H        | 0.54851258   | 0.87351324 | -0.3614037                      | 3128.64   | 3137.06 | 3847.63 |
|                                                                                                       | C        | -1.408846712 | -0.0005034 | -0.5780732                      | ! 59.84   | 78.40   | 124.99  |
|                                                                                                       | H        | -1.395119046 | -0.0039136 | -1.6671791                      | 154.68    | 247.48  | 444.57  |
|                                                                                                       | H        | -1.962877819 | -0.8795634 | -0.2463766                      | !Torsions |         |         |
|                                                                                                       | H        | -1.962128871 | 0.88153449 | -0.2525545                      |           |         |         |
| <br>QOOH-2         | C        | -0.1466462   | -0.0783408 | 0.03937137                      | 152.95    | 310.39  | 319.39  |
|                                                                                                       | C        | 0.0814575    | 0.04211347 | 1.50211574                      | 380.01    | 413.93  | 507.05  |
|                                                                                                       | O        | 1.41782367   | 0.36222199 | 1.82416926                      | 600.53    | 638.96  | 741.90  |
|                                                                                                       | O        | -0.7876764   | 1.04561333 | 1.9620233                       | 865.07    | 907.52  | 985.95  |
|                                                                                                       | O        | -0.7262371   | 1.04613809 | 3.37680985                      | 1021.31   | 1052.05 | 1072.43 |
|                                                                                                       | H        | 0.17259551   | 1.36697371 | 3.53829727                      | 1100.22   | 1118.11 | 1155.00 |
|                                                                                                       | H        | -0.9962303   | 0.44231808 | -0.3815346                      | 1174.80   | 1240.86 | 1251.97 |
|                                                                                                       | H        | -0.1209423   | -0.8832567 | 2.05111658                      | 1275.35   | 1322.77 | 1341.70 |
|                                                                                                       | H        | 1.70520649   | 1.04878189 | 1.21100077                      | 1389.22   | 1416.39 | 1428.54 |
|                                                                                                       | C        | 0.56743122   | -1.115118  | -0.7479975                      | 1442.09   | 1456.96 | 1475.30 |
|                                                                                                       | C        | 0.75105062   | -0.7364085 | -2.2169228                      | 1496.32   | 1503.71 | 1511.84 |
|                                                                                                       | H        | 0.01280239   | -2.0642379 | -0.6995761                      | 2978.46   | 3053.99 | 3055.68 |
|                                                                                                       | H        | 1.53994113   | -1.3176166 | -0.2902457                      | 3060.15   | 3066.69 | 3093.15 |

|               |            |            |            |            |            |           |         |
|---------------|------------|------------|------------|------------|------------|-----------|---------|
|               | H          | -0.2269094 | -0.5219126 | -2.6540172 | 3127.95    | 3138.04   | 3205.35 |
|               | H          | 1.32522473 | 0.19077518 | -2.275929  | 3786.13    | 3828.93   |         |
|               | C          | 1.44660082 | -1.833144  | -3.0111547 | ! 32.75    | 49.93     | 91.26   |
|               | H          | 0.8682373  | -2.7576773 | -2.9846378 | 162.89     | 243.15    | 259.23  |
|               | H          | 1.57713751 | -1.5491317 | -4.0544122 | 449.05     | !Torsions |         |
|               | H          | 2.43218205 | -2.0474913 | -2.595734  |            |           |         |
| <p>QOOH-3</p> | O          | -0.0053923 | 0.04695772 | 0.01323672 | 93.44      | 263.90    | 308.99  |
|               | C          | -0.0033418 | -0.0003343 | 1.40666042 | 351.97     | 447.28    | 477.34  |
|               | C          | 1.42705269 | 0.00170959 | 1.90050675 | 556.67     | 635.51    | 769.75  |
|               | C          | 2.13861576 | 1.26129789 | 1.55680917 | 872.48     | 927.17    | 1004.08 |
|               | C          | 3.38866164 | 1.64407867 | 2.26519703 | 1021.44    | 1056.33   | 1069.84 |
|               | C          | 3.84901385 | 3.0595739  | 1.93479134 | 1090.00    | 1118.30   | 1153.03 |
|               | H          | -0.8936309 | 0.26923664 | -0.2773892 | 1181.79    | 1194.88   | 1263.55 |
|               | H          | -1.9372342 | -1.8852509 | 0.81390645 | 1275.18    | 1307.29   | 1347.48 |
|               | H          | 1.91970029 | -0.8725883 | 1.45193141 | 1391.30    | 1411.65   | 1413.97 |
|               | H          | 1.42221506 | -0.1601439 | 2.98066199 | 1440.33    | 1463.10   | 1472.44 |
|               | H          | 3.24189773 | 1.53887243 | 3.3453848  | 1478.43    | 1502.23   | 1509.00 |
|               | H          | 4.19185232 | 0.93507456 | 2.01584525 | 2978.29    | 2996.60   | 3040.67 |
|               | H          | -0.5773993 | 0.83542103 | 1.81894076 | 3056.11    | 3063.59   | 3090.34 |
|               | O          | -0.5711211 | -1.2015721 | 1.88432768 | 3131.29    | 3140.55   | 3190.82 |
|               | O          | -1.9365768 | -1.1938421 | 1.48651649 | 3833.25    | 3887.36   |         |
|               | H          | 1.91046597 | 1.72698387 | 0.60646346 | ! 44.35    | 54.30     | 133.73  |
|               | H          | 3.08580098 | 3.78618979 | 2.21361076 | 163.94     | 201.09    | 246.09  |
| H             | 4.76880401 | 3.31248572 | 2.4601948  | 435.28     | ! Torsions |           |         |
| H             | 4.03238523 | 3.16306581 | 0.86488791 |            |            |           |         |
| <p>QOOH-4</p> | O          | -0.0388879 | -0.0153509 | 0.02282351 | 262.34     | 313.45    | 370.81  |
|               | C          | -0.0041691 | 0.01043814 | 1.43387517 | 437.35     | 441.38    | 515.83  |
|               | C          | 1.46071892 | -0.0218438 | 1.80745212 | 532.53     | 627.26    | 810.16  |
|               | C          | 1.65683328 | -0.0929635 | 3.31972911 | 863.63     | 941.64    | 986.98  |
|               | C          | 1.13626595 | -1.3494926 | 3.92550891 | 999.89     | 1029.40   | 1064.01 |
|               | C          | 0.87957971 | -1.4348451 | 5.38675257 | 1096.22    | 1109.78   | 1141.05 |
|               | O          | -1.4106498 | -0.0551495 | -0.3527207 | 1173.56    | 1219.25   | 1230.83 |
|               | H          | -1.5269864 | 0.82885078 | -0.7205793 | 1308.57    | 1333.02   | 1344.40 |
|               | H          | 2.72975577 | 0.01322529 | 3.5335596  | 1398.05    | 1404.99   | 1416.21 |
|               | O          | -0.578292  | 1.17884374 | 1.93691439 | 1429.66    | 1468.81   | 1476.14 |
|               | H          | 1.92334151 | 0.87832525 | 1.40115974 | 1479.80    | 1487.46   | 1490.17 |
|               | H          | 1.91878841 | -0.884237  | 1.32124044 | 2985.33    | 2995.06   | 3056.05 |
|               | H          | 1.24023857 | -2.2672269 | 3.35898079 | 3071.59    | 3072.59   | 3083.50 |
|               | H          | -0.5424911 | -0.8677084 | 1.80408146 | 3130.00    | 3132.00   | 3174.46 |
|               | H          | -1.5331991 | 1.08146631 | 1.90305525 | 3835.70    | 3889.75   |         |
|               | H          | 1.17314356 | 0.76937763 | 3.78562287 | ! 38.70    | 50.88     | 89.59   |
|               | H          | 0.33037932 | -2.3368519 | 5.65242588 | 127.18     | 167.33    | 200.41  |
| H             | 1.8145019  | -1.4435279 | 5.96340178 | 213.38     | ! Torsions |           |         |
| H             | 0.3107636  | -0.5696866 | 5.73560144 |            |            |           |         |
| <p>QOOH-5</p> | O          | 0.0031939  | 0.0315515  | -0.004783  | 120.62     | 276.49    | 324.96  |
|               | C          | 0.00205268 | -0.0006595 | 1.40710808 | 397.69     | 422.70    | 484.62  |
|               | C          | 1.45315602 | 0.02493378 | 1.82320204 | 564.97     | 638.06    | 775.08  |
|               | C          | 1.61849965 | -0.1310312 | 3.32961623 | 837.46     | 900.83    | 937.01  |
|               | C          | 3.08746384 | -0.0927615 | 3.75512622 | 1003.39    | 1009.27   | 1067.65 |
|               | C          | 3.87799837 | -1.2336433 | 3.22310952 | 1089.65    | 1114.27   | 1123.72 |
|               | O          | -1.3568674 | -0.0572496 | -0.4152029 | 1165.23    | 1206.49   | 1226.51 |
|               | H          | 1.064303   | 0.66047497 | 3.83377416 | 1293.00    | 1309.30   | 1331.03 |
|               | O          | -0.6509029 | 1.11002103 | 1.94199054 | 1369.42    | 1382.49   | 1405.17 |
|               | H          | 1.87539143 | 0.97732962 | 1.49421685 | 1417.30    | 1467.16   | 1471.96 |
|               | H          | 1.97942041 | -0.7709306 | 1.29445437 | 1477.04    | 1485.45   | 1505.43 |

|                                                                                                                                             |            |            |            |            |           |           |              |
|---------------------------------------------------------------------------------------------------------------------------------------------|------------|------------|------------|------------|-----------|-----------|--------------|
|                                                                                                                                             | H          | 3.53429267 | 0.85283981 | 3.43760105 | 2990.79   | 3039.27   | 3047.04      |
|                                                                                                                                             | H          | 3.1295029  | -0.087106  | 4.85283403 | 3071.32   | 3075.71   | 3109.97      |
|                                                                                                                                             | H          | -0.4982691 | -0.9236403 | 1.72095701 | 3129.74   | 3164.09   | 3269.88      |
|                                                                                                                                             | H          | -1.5965016 | 0.98228552 | 1.829447   | 3836.63   | 3884.21   |              |
|                                                                                                                                             | H          | 1.17958907 | -1.0814474 | 3.64862704 | ! 50.31   | 78.07     | 129.25       |
|                                                                                                                                             | H          | -1.4947023 | 0.82192142 | -0.7869496 | 163.93    | 180.79    | 210.14       |
|                                                                                                                                             | H          | 4.93318369 | -1.1420757 | 3.01796375 | 451.75    | !Torsions |              |
|                                                                                                                                             | H          | 3.44558764 | -2.2245096 | 3.20312953 |           |           |              |
| HO <sub>2</sub> _Pentanal complex                                                                                                           | C          | -0.0004214 | -0.0039481 | -6.246E-05 | 35.54     | 77.14     | 99.39 139.71 |
|                                                                                                                                             | C          | -0.0015487 | 0.00322176 | 1.52352085 | 229.45    | 293.06    | 304.79       |
|                                                                                                                                             | C          | 1.40168828 | 0.00246401 | 2.10249048 | 401.34    | 521.44    | 665.13       |
|                                                                                                                                             | C          | 1.4552599  | 0.05253883 | 3.59548226 | 700.43    | 750.75    | 864.36       |
|                                                                                                                                             | O          | 0.49014245 | 0.18305465 | 4.31342461 | 912.76    | 934.66    | 989.17       |
|                                                                                                                                             | O          | 0.65998746 | -2.618094  | 3.60192447 | 1057.22   | 1091.57   | 1148.15      |
|                                                                                                                                             | O          | -0.4405133 | -2.3253929 | 4.23437595 | 1167.59   | 1244.55   | 1286.09      |
|                                                                                                                                             | H          | 0.54932807 | -0.8791088 | -0.355564  | 1294.49   | 1315.16   | 1335.87      |
|                                                                                                                                             | H          | 1.96475342 | -0.8838446 | 1.79404005 | 1376.60   | 1414.84   | 1417.58      |
|                                                                                                                                             | H          | 1.98418862 | 0.85847072 | 1.73966242 | 1424.27   | 1447.79   | 1490.89      |
|                                                                                                                                             | H          | 2.46182654 | -0.0084293 | 4.04387593 | 1499.32   | 1503.88   | 1513.74      |
|                                                                                                                                             | H          | -0.3821498 | -1.354651  | 4.40779828 | 1535.02   | 1820.35   | 2985.40      |
|                                                                                                                                             | H          | -0.5451105 | 0.8758727  | 1.89196689 | 3035.01   | 3047.68   | 3061.05      |
|                                                                                                                                             | H          | -0.5403423 | -0.8727956 | 1.89190122 | 3067.75   | 3075.27   | 3079.85      |
|                                                                                                                                             | H          | 0.54336676 | 0.87124896 | -0.3654591 | 3111.02   | 3129.79   | 3138.40      |
|                                                                                                                                             | C          | -1.4096574 | -0.0122433 | -0.5771198 | 3430.61   |           |              |
|                                                                                                                                             | H          | -1.9665926 | 0.86744743 | -0.2518966 | ! 69.10   | 121.82    | 172.95       |
| H                                                                                                                                           | -1.3964235 | -0.0174101 | -1.6662015 | 247.04     | !Torsions |           |              |
| H                                                                                                                                           | -1.958586  | -0.893619  | -0.2434553 |            |           |           |              |
| 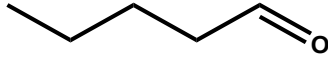<br>HO <sub>2</sub> + Pentanal<br>+ HO <sub>2</sub>      | O          | 0.50553254 | 2.59512924 | 1.64024162 | 1161.48   | 1475.38   | 3553.10      |
|                                                                                                                                             | O          | -0.1679742 | 2.44348437 | 0.50783059 |           |           |              |
|                                                                                                                                             | H          | -0.2367003 | 1.48037439 | 0.35008979 |           |           |              |
|                                                                                                                                             | C          | 6.0184E-05 | 0.00124921 | -4.284E-05 | 140.56    | 299.20    | 400.66       |
|                                                                                                                                             | C          | 2.7293E-05 | -0.0012722 | 1.52329305 | 670.32    | 697.98    | 745.75       |
|                                                                                                                                             | C          | 1.40164882 | 0.00011679 | 2.10655102 | 859.48    | 908.45    | 931.11       |
|                                                                                                                                             | C          | 1.43853024 | -0.0022977 | 3.60855584 | 981.37    | 1054.92   | 1090.15      |
|                                                                                                                                             | O          | 0.46478417 | -0.0050813 | 4.31006192 | 1146.97   | 1167.55   | 1240.50      |
|                                                                                                                                             | H          | 0.54839838 | -0.872008  | -0.3634906 | 1281.45   | 1312.22   | 1329.48      |
|                                                                                                                                             | H          | 1.97825565 | -0.867757  | 1.76669019 | 1372.14   | 1412.36   | 1416.18      |
|                                                                                                                                             | H          | 1.97533776 | 0.8710381  | 1.76955942 | 1425.60   | 1454.31   | 1489.45      |
|                                                                                                                                             | H          | 2.45008232 | -0.0013491 | 4.05939334 | 1499.00   | 1504.76   | 1513.63      |
|                                                                                                                                             | H          | -0.5445329 | 0.86808521 | 1.89787802 | 1865.27   | 2940.81   | 3036.12      |
|                                                                                                                                             | H          | -0.5416076 | -0.873689  | 1.89499537 | 3044.41   | 3060.11   | 3062.26      |
|                                                                                                                                             | H          | 0.54545994 | 0.87754198 | -0.3605941 | 3067.79   | 3073.87   | 3108.09      |
|                                                                                                                                             | C          | -1.4091651 | -0.0001614 | -0.5776584 | 3128.31   | 3136.97   |              |
|                                                                                                                                             | H          | -1.963843  | 0.87854282 | -0.2461224 | ! 76.72   | 113.55    | 186.14       |
| H                                                                                                                                           | -1.3968797 | 0.00166412 | -1.6668882 | 252.13     | !Torsions |           |              |
| H                                                                                                                                           | -1.9608856 | -0.8818184 | -0.2490396 |            |           |           |              |
| <br>HO <sub>2</sub> + 1-Penten-1-ol<br>+ HO <sub>2</sub> | O          | 0.50553254 | 2.59512924 | 1.64024162 | 1161.48   | 1475.38   | 3553.10      |
|                                                                                                                                             | O          | -0.1679742 | 2.44348437 | 0.50783059 |           |           |              |
|                                                                                                                                             | H          | -0.2367003 | 1.48037439 | 0.35008979 |           |           |              |
|                                                                                                                                             | C          | 0.00025799 | -0.0001046 | 0.00078112 | 201.42    | 287.30    | 415.29       |
|                                                                                                                                             | H          | -0.000575  | -0.0001886 | 1.0917344  | 563.33    | 664.50    | 753.58       |
| H                                                                                                                                           | 1.03698763 | 0.00013268 | -0.3334129 | 768.18     | 881.43    | 902.93    |              |
|                                                                                                                                             |            |            |            | 983.92     | 989.49    | 1063.95   |              |

|  |   |            |            |             |         |           |           |
|--|---|------------|------------|-------------|---------|-----------|-----------|
|  | H | -0.4574812 | -0.9343578 | -0.3287795  | 1089.11 | 1120.74   | 1146.50   |
|  | C | -0.7634959 | 1.20066828 | -0.5404506  | 1232.78 | 1269.62   | 1299.59   |
|  | H | -0.2847981 | 2.12752309 | -0.2183988  | 1326.13 | 1350.50   | 1381.26   |
|  | H | -0.732841  | 1.20829388 | -1.6328675  | 1413.82 | 1436.05   | 1493.71   |
|  | C | -2.2262138 | 1.21582364 | -0.0836282  | 1503.09 | 1504.42   | 1518.38   |
|  | H | -2.2568877 | 1.19808253 | 1.00767246  | 1757.41 | 3021.52   | 3055.19   |
|  | H | -2.7066605 | 0.28176563 | -0.3985029  | 3058.58 | 3079.19   | 3096.84   |
|  | C | -2.9905041 | 2.4055515  | -0.5884645  | 3125.29 | 3136.16   | 3208.54   |
|  | H | -2.9948155 | 3.30749023 | 0.00745224  | 3232.69 | 3867.09   |           |
|  | C | -3.6345672 | 2.44593275 | -1.7482587  | ! 37.26 | 97.92     | 241.49    |
|  | H | -4.1630401 | 3.32468709 | -2.090451   | 350.56  | !Torsions |           |
|  | O | -3.7333116 | 1.43447291 | -2.6516855  |         |           |           |
|  | H | -3.250494  | 0.66788088 | -2.328376   |         |           |           |
|  | O | 0.0000000  | 0.0000000  | 0.00794919  | 1758.25 |           |           |
|  | O | 0.0000000  | 0.0000000  | 1.19781253  |         |           |           |
|  | O | 0.00501895 | -0.0357187 | -0.0005619  | 177.95  | 298.67    | 405.41    |
|  | C | 0.00247524 | 0.00803873 | 1.36835868  | 500.38  | 617.97    | 736.16    |
|  | C | 1.3569991  | 0.00295021 | 1.97057654  | 794.88  | 914.26    | 923.54    |
|  | C | 2.1143249  | -1.3183802 | 1.7710259   | 988.31  | 1028.24   | 1078.41   |
|  | C | 3.5239174  | -1.2815165 | 2.34648108  | 1105.39 | 1125.99   | 1225.83   |
|  | C | 4.26984305 | -2.5947686 | 2.14790562  | 1230.81 | 1267.16   | 1286.59   |
|  | H | 3.74256301 | -3.4172317 | 2.63350177  | 1329.01 | 1335.09   | 1351.08   |
|  | H | 4.35160422 | -2.8360038 | 1.08716929  | 1393.80 | 1413.66   | 1455.71   |
|  | H | 4.08022075 | -0.4660752 | 1.87709176  | 1475.74 | 1491.41   | 1501.13   |
|  | H | 1.54906578 | -2.1309505 | 2.23706212  | 1503.40 | 1513.91   | 3039.08   |
|  | H | 1.94342361 | 0.81321505 | 1.52606132  | 3044.50 | 3052.74   | 3057.79   |
|  | H | -0.8306124 | -0.4740845 | 1.86880677  | 3072.57 | 3087.17   | 3105.86   |
|  | H | -0.8935249 | -0.1216736 | -0.3253481  | 3125.72 | 3131.95   | 3154.14   |
|  | H | 5.27724443 | -2.5526049 | 2.56096741  | 3904.33 |           |           |
|  | H | 3.47185428 | -1.0435823 | 3.41240669  | !79.63  | 91.70     | 134.41    |
|  | H | 2.15602323 | -1.5396235 | 0.70197478  | 247.90  | 354.46    | !Torsions |
|  | H | 1.27133629 | 0.21688699 | 3.03806022  |         |           |           |
|  | O | 0.00000000 | 0.00000000 | -0.00571069 | 3776.00 |           |           |
|  | H | 0.00000000 | 0.00000000 | 0.96571069  |         |           |           |
|  | O | 0.00858541 | 0.00788023 | -0.0033215  | 138.26  | 279.43    | 331.25    |
|  | C | 0.00080935 | -0.0060384 | 1.37336832  | 461.79  | 545.72    | 611.66    |
|  | C | 1.28041175 | -0.0048183 | 2.07309725  | 747.53  | 837.86    | 866.75    |
|  | C | 2.59229054 | -0.0788749 | 1.34906652  | 908.98  | 918.13    | 1035.04   |
|  | C | 3.57826926 | -0.9969758 | 2.06557279  | 1066.15 | 1089.50   | 1103.82   |
|  | C | 4.9121342  | -1.0856464 | 1.33659938  | 1150.02 | 1182.93   | 1207.71   |
|  | H | 1.31229708 | 0.44116013 | 3.0637562   | 1265.99 | 1272.53   | 1302.29   |
|  | O | 0.45084506 | -1.1742052 | 2.00883774  | 1329.73 | 1334.60   | 1386.71   |
|  | H | 4.77378697 | -1.466265  | 0.32379592  | 1415.06 | 1425.11   | 1481.83   |
|  | H | 5.60681993 | -1.7479306 | 1.85173792  | 1498.58 | 1504.30   | 1513.37   |
|  | H | 5.37993578 | -0.1029602 | 1.2592956   | 1544.51 | 3052.65   | 3057.93   |
|  | H | 3.13021948 | -1.9885882 | 2.15161947  | 3060.33 | 3092.74   | 3119.51   |
|  | H | 3.73616948 | -0.6359088 | 3.08518372  | 3127.35 | 3134.40   | 3135.90   |
|  | H | 3.00814019 | 0.93017088 | 1.27696458  | 3144.23 | 3871.14   |           |
|  | H | 2.41779992 | -0.432493  | 0.3330755   | ! 73.55 | 94.77     | 247.47    |
|  | H | -0.8810854 | 0.43763417 | 1.82633978  | 259.38  | !Torsions |           |
|  | H | -0.749394  | -0.4888337 | -0.3241442  |         |           |           |
|  | O | 0.00000000 | 0.00000000 | -0.00571069 | 3776.00 |           |           |
|  | H | 0.00000000 | 0.00000000 | 0.96571069  |         |           |           |

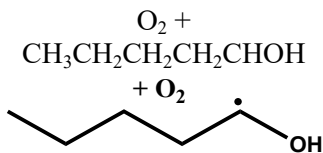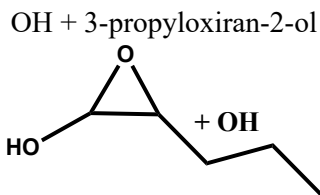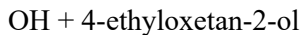



|                                                                                                                                                   |                                                                                                                                                                                                                                                                                                                                                                                                                                                                                                                                                                                                                                                                                                                                                                                                                                                                                                                                                                                                                                                                                                                                                                                                                                                                                                                                                                                                                                                                                                                                                                      |              |             |            |             |   |            |            |            |   |            |             |            |   |            |             |            |   |            |             |            |   |            |             |             |   |            |              |            |   |            |            |            |   |            |            |            |   |            |            |            |   |            |            |            |   |            |            |            |   |            |            |            |                                                                                                                                                                                                                                                                                                                                                                                                                                                                                                                                                                                                                                                                                                                        |           |            |            |        |            |            |            |        |            |            |            |        |            |            |            |                                                                                                                                                                                                                                                                                                                                                                                                                                                                                                                                                                                                                                                                                                                                                                                                                                                                                                                                                                               |            |            |           |         |            |            |            |                                                                                                                                                                                                                                                                                                                                                                                                                                                                                                                                                                                                                                                                                                                                                                                                                                                                                                                                                |         |         |         |         |         |         |         |         |         |         |         |                   |         |         |         |         |         |         |         |         |         |         |         |         |         |         |         |         |         |         |         |         |         |         |         |         |         |         |          |         |   |        |        |   |          |  |
|---------------------------------------------------------------------------------------------------------------------------------------------------|----------------------------------------------------------------------------------------------------------------------------------------------------------------------------------------------------------------------------------------------------------------------------------------------------------------------------------------------------------------------------------------------------------------------------------------------------------------------------------------------------------------------------------------------------------------------------------------------------------------------------------------------------------------------------------------------------------------------------------------------------------------------------------------------------------------------------------------------------------------------------------------------------------------------------------------------------------------------------------------------------------------------------------------------------------------------------------------------------------------------------------------------------------------------------------------------------------------------------------------------------------------------------------------------------------------------------------------------------------------------------------------------------------------------------------------------------------------------------------------------------------------------------------------------------------------------|--------------|-------------|------------|-------------|---|------------|------------|------------|---|------------|-------------|------------|---|------------|-------------|------------|---|------------|-------------|------------|---|------------|-------------|-------------|---|------------|--------------|------------|---|------------|------------|------------|---|------------|------------|------------|---|------------|------------|------------|---|------------|------------|------------|---|------------|------------|------------|---|------------|------------|------------|------------------------------------------------------------------------------------------------------------------------------------------------------------------------------------------------------------------------------------------------------------------------------------------------------------------------------------------------------------------------------------------------------------------------------------------------------------------------------------------------------------------------------------------------------------------------------------------------------------------------------------------------------------------------------------------------------------------------|-----------|------------|------------|--------|------------|------------|------------|--------|------------|------------|------------|--------|------------|------------|------------|-------------------------------------------------------------------------------------------------------------------------------------------------------------------------------------------------------------------------------------------------------------------------------------------------------------------------------------------------------------------------------------------------------------------------------------------------------------------------------------------------------------------------------------------------------------------------------------------------------------------------------------------------------------------------------------------------------------------------------------------------------------------------------------------------------------------------------------------------------------------------------------------------------------------------------------------------------------------------------|------------|------------|-----------|---------|------------|------------|------------|------------------------------------------------------------------------------------------------------------------------------------------------------------------------------------------------------------------------------------------------------------------------------------------------------------------------------------------------------------------------------------------------------------------------------------------------------------------------------------------------------------------------------------------------------------------------------------------------------------------------------------------------------------------------------------------------------------------------------------------------------------------------------------------------------------------------------------------------------------------------------------------------------------------------------------------------|---------|---------|---------|---------|---------|---------|---------|---------|---------|---------|---------|-------------------|---------|---------|---------|---------|---------|---------|---------|---------|---------|---------|---------|---------|---------|---------|---------|---------|---------|---------|---------|---------|---------|---------|---------|---------|---------|---------|----------|---------|---|--------|--------|---|----------|--|
| 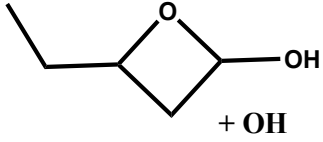 <p>+ OH</p>                                                     | <table border="1"> <tbody> <tr><td>C</td><td>0.01920659</td><td>0.03079032</td><td>0.03037982</td></tr> <tr><td>C</td><td>0.00840188</td><td>0.01182081</td><td>1.55268745</td></tr> <tr><td>C</td><td>1.40908004</td><td>-0.041704</td><td>2.12042403</td></tr> <tr><td>H</td><td>1.92872353</td><td>-0.9342214</td><td>1.76326786</td></tr> <tr><td>C</td><td>1.54913121</td><td>0.25705172</td><td>3.61783354</td></tr> <tr><td>C</td><td>2.1727325</td><td>1.58036322</td><td>3.15162295</td></tr> <tr><td>O</td><td>3.43074937</td><td>1.92176132</td><td>3.60644288</td></tr> <tr><td>O</td><td>2.16891186</td><td>1.14483516</td><td>1.79023049</td></tr> <tr><td>H</td><td>0.60322644</td><td>0.87740349</td><td>-0.3285103</td></tr> <tr><td>H</td><td>-0.9884317</td><td>0.1110834</td><td>-0.3744358</td></tr> <tr><td>H</td><td>0.46941738</td><td>-0.8809127</td><td>-0.3650476</td></tr> <tr><td>H</td><td>-0.4878003</td><td>0.9063537</td><td>1.9388332</td></tr> <tr><td>H</td><td>-0.5491728</td><td>-0.8513297</td><td>1.92566819</td></tr> <tr><td>H</td><td>0.624911</td><td>0.32444392</td><td>4.18638022</td></tr> <tr><td>H</td><td>2.26351364</td><td>-0.3730825</td><td>4.14336717</td></tr> <tr><td>H</td><td>1.55476492</td><td>2.46771152</td><td>3.2930619</td></tr> <tr><td>H</td><td>4.0302396</td><td>1.1978027</td><td>3.39739093</td></tr> </tbody> </table>                                                                                                                                                                      | C            | 0.01920659  | 0.03079032 | 0.03037982  | C | 0.00840188 | 0.01182081 | 1.55268745 | C | 1.40908004 | -0.041704   | 2.12042403 | H | 1.92872353 | -0.9342214  | 1.76326786 | C | 1.54913121 | 0.25705172  | 3.61783354 | C | 2.1727325  | 1.58036322  | 3.15162295  | O | 3.43074937 | 1.92176132   | 3.60644288 | O | 2.16891186 | 1.14483516 | 1.79023049 | H | 0.60322644 | 0.87740349 | -0.3285103 | H | -0.9884317 | 0.1110834  | -0.3744358 | H | 0.46941738 | -0.8809127 | -0.3650476 | H | -0.4878003 | 0.9063537  | 1.9388332  | H | -0.5491728 | -0.8513297 | 1.92566819 | H                                                                                                                                                                                                                                                                                                                                                                                                                                                                                                                                                                                                                                                                                                                      | 0.624911  | 0.32444392 | 4.18638022 | H      | 2.26351364 | -0.3730825 | 4.14336717 | H      | 1.55476492 | 2.46771152 | 3.2930619  | H      | 4.0302396  | 1.1978027  | 3.39739093 | <table border="1"> <tbody> <tr><td>66.42</td><td>192.09</td><td>353.77</td></tr> <tr><td>425.53</td><td>480.75</td><td>558.56</td></tr> <tr><td>736.08</td><td>794.61</td><td>823.57</td></tr> <tr><td>934.75</td><td>972.91</td><td>978.59</td></tr> <tr><td>1007.65</td><td>1030.66</td><td>1079.43</td></tr> <tr><td>1110.19</td><td>1117.41</td><td>1196.56</td></tr> <tr><td>1208.93</td><td>1252.80</td><td>1278.38</td></tr> <tr><td>1299.66</td><td>1319.50</td><td>1339.72</td></tr> <tr><td>1365.62</td><td>1412.67</td><td>1417.69</td></tr> <tr><td>1458.12</td><td>1479.63</td><td>493.99</td></tr> <tr><td>1502.45</td><td>1512.18</td><td>3049.38</td></tr> <tr><td>3059.51</td><td>3065.33</td><td>3092.16</td></tr> <tr><td>3097.41</td><td>3105.15</td><td>3134.55</td></tr> <tr><td>3147.81</td><td>3164.65</td><td>3851.28</td></tr> <tr><td>!</td><td>118.43</td><td>237.81</td></tr> <tr><td>!</td><td colspan="2">Torsions</td></tr> </tbody> </table> | 66.42      | 192.09     | 353.77    | 425.53  | 480.75     | 558.56     | 736.08     | 794.61                                                                                                                                                                                                                                                                                                                                                                                                                                                                                                                                                                                                                                                                                                                                                                                                                                                                                                                                         | 823.57  | 934.75  | 972.91  | 978.59  | 1007.65 | 1030.66 | 1079.43 | 1110.19 | 1117.41 | 1196.56 | 1208.93 | 1252.80           | 1278.38 | 1299.66 | 1319.50 | 1339.72 | 1365.62 | 1412.67 | 1417.69 | 1458.12 | 1479.63 | 493.99  | 1502.45 | 1512.18 | 3049.38 | 3059.51 | 3065.33 | 3092.16 | 3097.41 | 3105.15 | 3134.55 | 3147.81 | 3164.65 | 3851.28 | !       | 118.43  | 237.81  | !       | Torsions |         |   |        |        |   |          |  |
| C                                                                                                                                                 | 0.01920659                                                                                                                                                                                                                                                                                                                                                                                                                                                                                                                                                                                                                                                                                                                                                                                                                                                                                                                                                                                                                                                                                                                                                                                                                                                                                                                                                                                                                                                                                                                                                           | 0.03079032   | 0.03037982  |            |             |   |            |            |            |   |            |             |            |   |            |             |            |   |            |             |            |   |            |             |             |   |            |              |            |   |            |            |            |   |            |            |            |   |            |            |            |   |            |            |            |   |            |            |            |   |            |            |            |                                                                                                                                                                                                                                                                                                                                                                                                                                                                                                                                                                                                                                                                                                                        |           |            |            |        |            |            |            |        |            |            |            |        |            |            |            |                                                                                                                                                                                                                                                                                                                                                                                                                                                                                                                                                                                                                                                                                                                                                                                                                                                                                                                                                                               |            |            |           |         |            |            |            |                                                                                                                                                                                                                                                                                                                                                                                                                                                                                                                                                                                                                                                                                                                                                                                                                                                                                                                                                |         |         |         |         |         |         |         |         |         |         |         |                   |         |         |         |         |         |         |         |         |         |         |         |         |         |         |         |         |         |         |         |         |         |         |         |         |         |         |          |         |   |        |        |   |          |  |
| C                                                                                                                                                 | 0.00840188                                                                                                                                                                                                                                                                                                                                                                                                                                                                                                                                                                                                                                                                                                                                                                                                                                                                                                                                                                                                                                                                                                                                                                                                                                                                                                                                                                                                                                                                                                                                                           | 0.01182081   | 1.55268745  |            |             |   |            |            |            |   |            |             |            |   |            |             |            |   |            |             |            |   |            |             |             |   |            |              |            |   |            |            |            |   |            |            |            |   |            |            |            |   |            |            |            |   |            |            |            |   |            |            |            |                                                                                                                                                                                                                                                                                                                                                                                                                                                                                                                                                                                                                                                                                                                        |           |            |            |        |            |            |            |        |            |            |            |        |            |            |            |                                                                                                                                                                                                                                                                                                                                                                                                                                                                                                                                                                                                                                                                                                                                                                                                                                                                                                                                                                               |            |            |           |         |            |            |            |                                                                                                                                                                                                                                                                                                                                                                                                                                                                                                                                                                                                                                                                                                                                                                                                                                                                                                                                                |         |         |         |         |         |         |         |         |         |         |         |                   |         |         |         |         |         |         |         |         |         |         |         |         |         |         |         |         |         |         |         |         |         |         |         |         |         |         |          |         |   |        |        |   |          |  |
| C                                                                                                                                                 | 1.40908004                                                                                                                                                                                                                                                                                                                                                                                                                                                                                                                                                                                                                                                                                                                                                                                                                                                                                                                                                                                                                                                                                                                                                                                                                                                                                                                                                                                                                                                                                                                                                           | -0.041704    | 2.12042403  |            |             |   |            |            |            |   |            |             |            |   |            |             |            |   |            |             |            |   |            |             |             |   |            |              |            |   |            |            |            |   |            |            |            |   |            |            |            |   |            |            |            |   |            |            |            |   |            |            |            |                                                                                                                                                                                                                                                                                                                                                                                                                                                                                                                                                                                                                                                                                                                        |           |            |            |        |            |            |            |        |            |            |            |        |            |            |            |                                                                                                                                                                                                                                                                                                                                                                                                                                                                                                                                                                                                                                                                                                                                                                                                                                                                                                                                                                               |            |            |           |         |            |            |            |                                                                                                                                                                                                                                                                                                                                                                                                                                                                                                                                                                                                                                                                                                                                                                                                                                                                                                                                                |         |         |         |         |         |         |         |         |         |         |         |                   |         |         |         |         |         |         |         |         |         |         |         |         |         |         |         |         |         |         |         |         |         |         |         |         |         |         |          |         |   |        |        |   |          |  |
| H                                                                                                                                                 | 1.92872353                                                                                                                                                                                                                                                                                                                                                                                                                                                                                                                                                                                                                                                                                                                                                                                                                                                                                                                                                                                                                                                                                                                                                                                                                                                                                                                                                                                                                                                                                                                                                           | -0.9342214   | 1.76326786  |            |             |   |            |            |            |   |            |             |            |   |            |             |            |   |            |             |            |   |            |             |             |   |            |              |            |   |            |            |            |   |            |            |            |   |            |            |            |   |            |            |            |   |            |            |            |   |            |            |            |                                                                                                                                                                                                                                                                                                                                                                                                                                                                                                                                                                                                                                                                                                                        |           |            |            |        |            |            |            |        |            |            |            |        |            |            |            |                                                                                                                                                                                                                                                                                                                                                                                                                                                                                                                                                                                                                                                                                                                                                                                                                                                                                                                                                                               |            |            |           |         |            |            |            |                                                                                                                                                                                                                                                                                                                                                                                                                                                                                                                                                                                                                                                                                                                                                                                                                                                                                                                                                |         |         |         |         |         |         |         |         |         |         |         |                   |         |         |         |         |         |         |         |         |         |         |         |         |         |         |         |         |         |         |         |         |         |         |         |         |         |         |          |         |   |        |        |   |          |  |
| C                                                                                                                                                 | 1.54913121                                                                                                                                                                                                                                                                                                                                                                                                                                                                                                                                                                                                                                                                                                                                                                                                                                                                                                                                                                                                                                                                                                                                                                                                                                                                                                                                                                                                                                                                                                                                                           | 0.25705172   | 3.61783354  |            |             |   |            |            |            |   |            |             |            |   |            |             |            |   |            |             |            |   |            |             |             |   |            |              |            |   |            |            |            |   |            |            |            |   |            |            |            |   |            |            |            |   |            |            |            |   |            |            |            |                                                                                                                                                                                                                                                                                                                                                                                                                                                                                                                                                                                                                                                                                                                        |           |            |            |        |            |            |            |        |            |            |            |        |            |            |            |                                                                                                                                                                                                                                                                                                                                                                                                                                                                                                                                                                                                                                                                                                                                                                                                                                                                                                                                                                               |            |            |           |         |            |            |            |                                                                                                                                                                                                                                                                                                                                                                                                                                                                                                                                                                                                                                                                                                                                                                                                                                                                                                                                                |         |         |         |         |         |         |         |         |         |         |         |                   |         |         |         |         |         |         |         |         |         |         |         |         |         |         |         |         |         |         |         |         |         |         |         |         |         |         |          |         |   |        |        |   |          |  |
| C                                                                                                                                                 | 2.1727325                                                                                                                                                                                                                                                                                                                                                                                                                                                                                                                                                                                                                                                                                                                                                                                                                                                                                                                                                                                                                                                                                                                                                                                                                                                                                                                                                                                                                                                                                                                                                            | 1.58036322   | 3.15162295  |            |             |   |            |            |            |   |            |             |            |   |            |             |            |   |            |             |            |   |            |             |             |   |            |              |            |   |            |            |            |   |            |            |            |   |            |            |            |   |            |            |            |   |            |            |            |   |            |            |            |                                                                                                                                                                                                                                                                                                                                                                                                                                                                                                                                                                                                                                                                                                                        |           |            |            |        |            |            |            |        |            |            |            |        |            |            |            |                                                                                                                                                                                                                                                                                                                                                                                                                                                                                                                                                                                                                                                                                                                                                                                                                                                                                                                                                                               |            |            |           |         |            |            |            |                                                                                                                                                                                                                                                                                                                                                                                                                                                                                                                                                                                                                                                                                                                                                                                                                                                                                                                                                |         |         |         |         |         |         |         |         |         |         |         |                   |         |         |         |         |         |         |         |         |         |         |         |         |         |         |         |         |         |         |         |         |         |         |         |         |         |         |          |         |   |        |        |   |          |  |
| O                                                                                                                                                 | 3.43074937                                                                                                                                                                                                                                                                                                                                                                                                                                                                                                                                                                                                                                                                                                                                                                                                                                                                                                                                                                                                                                                                                                                                                                                                                                                                                                                                                                                                                                                                                                                                                           | 1.92176132   | 3.60644288  |            |             |   |            |            |            |   |            |             |            |   |            |             |            |   |            |             |            |   |            |             |             |   |            |              |            |   |            |            |            |   |            |            |            |   |            |            |            |   |            |            |            |   |            |            |            |   |            |            |            |                                                                                                                                                                                                                                                                                                                                                                                                                                                                                                                                                                                                                                                                                                                        |           |            |            |        |            |            |            |        |            |            |            |        |            |            |            |                                                                                                                                                                                                                                                                                                                                                                                                                                                                                                                                                                                                                                                                                                                                                                                                                                                                                                                                                                               |            |            |           |         |            |            |            |                                                                                                                                                                                                                                                                                                                                                                                                                                                                                                                                                                                                                                                                                                                                                                                                                                                                                                                                                |         |         |         |         |         |         |         |         |         |         |         |                   |         |         |         |         |         |         |         |         |         |         |         |         |         |         |         |         |         |         |         |         |         |         |         |         |         |         |          |         |   |        |        |   |          |  |
| O                                                                                                                                                 | 2.16891186                                                                                                                                                                                                                                                                                                                                                                                                                                                                                                                                                                                                                                                                                                                                                                                                                                                                                                                                                                                                                                                                                                                                                                                                                                                                                                                                                                                                                                                                                                                                                           | 1.14483516   | 1.79023049  |            |             |   |            |            |            |   |            |             |            |   |            |             |            |   |            |             |            |   |            |             |             |   |            |              |            |   |            |            |            |   |            |            |            |   |            |            |            |   |            |            |            |   |            |            |            |   |            |            |            |                                                                                                                                                                                                                                                                                                                                                                                                                                                                                                                                                                                                                                                                                                                        |           |            |            |        |            |            |            |        |            |            |            |        |            |            |            |                                                                                                                                                                                                                                                                                                                                                                                                                                                                                                                                                                                                                                                                                                                                                                                                                                                                                                                                                                               |            |            |           |         |            |            |            |                                                                                                                                                                                                                                                                                                                                                                                                                                                                                                                                                                                                                                                                                                                                                                                                                                                                                                                                                |         |         |         |         |         |         |         |         |         |         |         |                   |         |         |         |         |         |         |         |         |         |         |         |         |         |         |         |         |         |         |         |         |         |         |         |         |         |         |          |         |   |        |        |   |          |  |
| H                                                                                                                                                 | 0.60322644                                                                                                                                                                                                                                                                                                                                                                                                                                                                                                                                                                                                                                                                                                                                                                                                                                                                                                                                                                                                                                                                                                                                                                                                                                                                                                                                                                                                                                                                                                                                                           | 0.87740349   | -0.3285103  |            |             |   |            |            |            |   |            |             |            |   |            |             |            |   |            |             |            |   |            |             |             |   |            |              |            |   |            |            |            |   |            |            |            |   |            |            |            |   |            |            |            |   |            |            |            |   |            |            |            |                                                                                                                                                                                                                                                                                                                                                                                                                                                                                                                                                                                                                                                                                                                        |           |            |            |        |            |            |            |        |            |            |            |        |            |            |            |                                                                                                                                                                                                                                                                                                                                                                                                                                                                                                                                                                                                                                                                                                                                                                                                                                                                                                                                                                               |            |            |           |         |            |            |            |                                                                                                                                                                                                                                                                                                                                                                                                                                                                                                                                                                                                                                                                                                                                                                                                                                                                                                                                                |         |         |         |         |         |         |         |         |         |         |         |                   |         |         |         |         |         |         |         |         |         |         |         |         |         |         |         |         |         |         |         |         |         |         |         |         |         |         |          |         |   |        |        |   |          |  |
| H                                                                                                                                                 | -0.9884317                                                                                                                                                                                                                                                                                                                                                                                                                                                                                                                                                                                                                                                                                                                                                                                                                                                                                                                                                                                                                                                                                                                                                                                                                                                                                                                                                                                                                                                                                                                                                           | 0.1110834    | -0.3744358  |            |             |   |            |            |            |   |            |             |            |   |            |             |            |   |            |             |            |   |            |             |             |   |            |              |            |   |            |            |            |   |            |            |            |   |            |            |            |   |            |            |            |   |            |            |            |   |            |            |            |                                                                                                                                                                                                                                                                                                                                                                                                                                                                                                                                                                                                                                                                                                                        |           |            |            |        |            |            |            |        |            |            |            |        |            |            |            |                                                                                                                                                                                                                                                                                                                                                                                                                                                                                                                                                                                                                                                                                                                                                                                                                                                                                                                                                                               |            |            |           |         |            |            |            |                                                                                                                                                                                                                                                                                                                                                                                                                                                                                                                                                                                                                                                                                                                                                                                                                                                                                                                                                |         |         |         |         |         |         |         |         |         |         |         |                   |         |         |         |         |         |         |         |         |         |         |         |         |         |         |         |         |         |         |         |         |         |         |         |         |         |         |          |         |   |        |        |   |          |  |
| H                                                                                                                                                 | 0.46941738                                                                                                                                                                                                                                                                                                                                                                                                                                                                                                                                                                                                                                                                                                                                                                                                                                                                                                                                                                                                                                                                                                                                                                                                                                                                                                                                                                                                                                                                                                                                                           | -0.8809127   | -0.3650476  |            |             |   |            |            |            |   |            |             |            |   |            |             |            |   |            |             |            |   |            |             |             |   |            |              |            |   |            |            |            |   |            |            |            |   |            |            |            |   |            |            |            |   |            |            |            |   |            |            |            |                                                                                                                                                                                                                                                                                                                                                                                                                                                                                                                                                                                                                                                                                                                        |           |            |            |        |            |            |            |        |            |            |            |        |            |            |            |                                                                                                                                                                                                                                                                                                                                                                                                                                                                                                                                                                                                                                                                                                                                                                                                                                                                                                                                                                               |            |            |           |         |            |            |            |                                                                                                                                                                                                                                                                                                                                                                                                                                                                                                                                                                                                                                                                                                                                                                                                                                                                                                                                                |         |         |         |         |         |         |         |         |         |         |         |                   |         |         |         |         |         |         |         |         |         |         |         |         |         |         |         |         |         |         |         |         |         |         |         |         |         |         |          |         |   |        |        |   |          |  |
| H                                                                                                                                                 | -0.4878003                                                                                                                                                                                                                                                                                                                                                                                                                                                                                                                                                                                                                                                                                                                                                                                                                                                                                                                                                                                                                                                                                                                                                                                                                                                                                                                                                                                                                                                                                                                                                           | 0.9063537    | 1.9388332   |            |             |   |            |            |            |   |            |             |            |   |            |             |            |   |            |             |            |   |            |             |             |   |            |              |            |   |            |            |            |   |            |            |            |   |            |            |            |   |            |            |            |   |            |            |            |   |            |            |            |                                                                                                                                                                                                                                                                                                                                                                                                                                                                                                                                                                                                                                                                                                                        |           |            |            |        |            |            |            |        |            |            |            |        |            |            |            |                                                                                                                                                                                                                                                                                                                                                                                                                                                                                                                                                                                                                                                                                                                                                                                                                                                                                                                                                                               |            |            |           |         |            |            |            |                                                                                                                                                                                                                                                                                                                                                                                                                                                                                                                                                                                                                                                                                                                                                                                                                                                                                                                                                |         |         |         |         |         |         |         |         |         |         |         |                   |         |         |         |         |         |         |         |         |         |         |         |         |         |         |         |         |         |         |         |         |         |         |         |         |         |         |          |         |   |        |        |   |          |  |
| H                                                                                                                                                 | -0.5491728                                                                                                                                                                                                                                                                                                                                                                                                                                                                                                                                                                                                                                                                                                                                                                                                                                                                                                                                                                                                                                                                                                                                                                                                                                                                                                                                                                                                                                                                                                                                                           | -0.8513297   | 1.92566819  |            |             |   |            |            |            |   |            |             |            |   |            |             |            |   |            |             |            |   |            |             |             |   |            |              |            |   |            |            |            |   |            |            |            |   |            |            |            |   |            |            |            |   |            |            |            |   |            |            |            |                                                                                                                                                                                                                                                                                                                                                                                                                                                                                                                                                                                                                                                                                                                        |           |            |            |        |            |            |            |        |            |            |            |        |            |            |            |                                                                                                                                                                                                                                                                                                                                                                                                                                                                                                                                                                                                                                                                                                                                                                                                                                                                                                                                                                               |            |            |           |         |            |            |            |                                                                                                                                                                                                                                                                                                                                                                                                                                                                                                                                                                                                                                                                                                                                                                                                                                                                                                                                                |         |         |         |         |         |         |         |         |         |         |         |                   |         |         |         |         |         |         |         |         |         |         |         |         |         |         |         |         |         |         |         |         |         |         |         |         |         |         |          |         |   |        |        |   |          |  |
| H                                                                                                                                                 | 0.624911                                                                                                                                                                                                                                                                                                                                                                                                                                                                                                                                                                                                                                                                                                                                                                                                                                                                                                                                                                                                                                                                                                                                                                                                                                                                                                                                                                                                                                                                                                                                                             | 0.32444392   | 4.18638022  |            |             |   |            |            |            |   |            |             |            |   |            |             |            |   |            |             |            |   |            |             |             |   |            |              |            |   |            |            |            |   |            |            |            |   |            |            |            |   |            |            |            |   |            |            |            |   |            |            |            |                                                                                                                                                                                                                                                                                                                                                                                                                                                                                                                                                                                                                                                                                                                        |           |            |            |        |            |            |            |        |            |            |            |        |            |            |            |                                                                                                                                                                                                                                                                                                                                                                                                                                                                                                                                                                                                                                                                                                                                                                                                                                                                                                                                                                               |            |            |           |         |            |            |            |                                                                                                                                                                                                                                                                                                                                                                                                                                                                                                                                                                                                                                                                                                                                                                                                                                                                                                                                                |         |         |         |         |         |         |         |         |         |         |         |                   |         |         |         |         |         |         |         |         |         |         |         |         |         |         |         |         |         |         |         |         |         |         |         |         |         |         |          |         |   |        |        |   |          |  |
| H                                                                                                                                                 | 2.26351364                                                                                                                                                                                                                                                                                                                                                                                                                                                                                                                                                                                                                                                                                                                                                                                                                                                                                                                                                                                                                                                                                                                                                                                                                                                                                                                                                                                                                                                                                                                                                           | -0.3730825   | 4.14336717  |            |             |   |            |            |            |   |            |             |            |   |            |             |            |   |            |             |            |   |            |             |             |   |            |              |            |   |            |            |            |   |            |            |            |   |            |            |            |   |            |            |            |   |            |            |            |   |            |            |            |                                                                                                                                                                                                                                                                                                                                                                                                                                                                                                                                                                                                                                                                                                                        |           |            |            |        |            |            |            |        |            |            |            |        |            |            |            |                                                                                                                                                                                                                                                                                                                                                                                                                                                                                                                                                                                                                                                                                                                                                                                                                                                                                                                                                                               |            |            |           |         |            |            |            |                                                                                                                                                                                                                                                                                                                                                                                                                                                                                                                                                                                                                                                                                                                                                                                                                                                                                                                                                |         |         |         |         |         |         |         |         |         |         |         |                   |         |         |         |         |         |         |         |         |         |         |         |         |         |         |         |         |         |         |         |         |         |         |         |         |         |         |          |         |   |        |        |   |          |  |
| H                                                                                                                                                 | 1.55476492                                                                                                                                                                                                                                                                                                                                                                                                                                                                                                                                                                                                                                                                                                                                                                                                                                                                                                                                                                                                                                                                                                                                                                                                                                                                                                                                                                                                                                                                                                                                                           | 2.46771152   | 3.2930619   |            |             |   |            |            |            |   |            |             |            |   |            |             |            |   |            |             |            |   |            |             |             |   |            |              |            |   |            |            |            |   |            |            |            |   |            |            |            |   |            |            |            |   |            |            |            |   |            |            |            |                                                                                                                                                                                                                                                                                                                                                                                                                                                                                                                                                                                                                                                                                                                        |           |            |            |        |            |            |            |        |            |            |            |        |            |            |            |                                                                                                                                                                                                                                                                                                                                                                                                                                                                                                                                                                                                                                                                                                                                                                                                                                                                                                                                                                               |            |            |           |         |            |            |            |                                                                                                                                                                                                                                                                                                                                                                                                                                                                                                                                                                                                                                                                                                                                                                                                                                                                                                                                                |         |         |         |         |         |         |         |         |         |         |         |                   |         |         |         |         |         |         |         |         |         |         |         |         |         |         |         |         |         |         |         |         |         |         |         |         |         |         |          |         |   |        |        |   |          |  |
| H                                                                                                                                                 | 4.0302396                                                                                                                                                                                                                                                                                                                                                                                                                                                                                                                                                                                                                                                                                                                                                                                                                                                                                                                                                                                                                                                                                                                                                                                                                                                                                                                                                                                                                                                                                                                                                            | 1.1978027    | 3.39739093  |            |             |   |            |            |            |   |            |             |            |   |            |             |            |   |            |             |            |   |            |             |             |   |            |              |            |   |            |            |            |   |            |            |            |   |            |            |            |   |            |            |            |   |            |            |            |   |            |            |            |                                                                                                                                                                                                                                                                                                                                                                                                                                                                                                                                                                                                                                                                                                                        |           |            |            |        |            |            |            |        |            |            |            |        |            |            |            |                                                                                                                                                                                                                                                                                                                                                                                                                                                                                                                                                                                                                                                                                                                                                                                                                                                                                                                                                                               |            |            |           |         |            |            |            |                                                                                                                                                                                                                                                                                                                                                                                                                                                                                                                                                                                                                                                                                                                                                                                                                                                                                                                                                |         |         |         |         |         |         |         |         |         |         |         |                   |         |         |         |         |         |         |         |         |         |         |         |         |         |         |         |         |         |         |         |         |         |         |         |         |         |         |          |         |   |        |        |   |          |  |
| 66.42                                                                                                                                             | 192.09                                                                                                                                                                                                                                                                                                                                                                                                                                                                                                                                                                                                                                                                                                                                                                                                                                                                                                                                                                                                                                                                                                                                                                                                                                                                                                                                                                                                                                                                                                                                                               | 353.77       |             |            |             |   |            |            |            |   |            |             |            |   |            |             |            |   |            |             |            |   |            |             |             |   |            |              |            |   |            |            |            |   |            |            |            |   |            |            |            |   |            |            |            |   |            |            |            |   |            |            |            |                                                                                                                                                                                                                                                                                                                                                                                                                                                                                                                                                                                                                                                                                                                        |           |            |            |        |            |            |            |        |            |            |            |        |            |            |            |                                                                                                                                                                                                                                                                                                                                                                                                                                                                                                                                                                                                                                                                                                                                                                                                                                                                                                                                                                               |            |            |           |         |            |            |            |                                                                                                                                                                                                                                                                                                                                                                                                                                                                                                                                                                                                                                                                                                                                                                                                                                                                                                                                                |         |         |         |         |         |         |         |         |         |         |         |                   |         |         |         |         |         |         |         |         |         |         |         |         |         |         |         |         |         |         |         |         |         |         |         |         |         |         |          |         |   |        |        |   |          |  |
| 425.53                                                                                                                                            | 480.75                                                                                                                                                                                                                                                                                                                                                                                                                                                                                                                                                                                                                                                                                                                                                                                                                                                                                                                                                                                                                                                                                                                                                                                                                                                                                                                                                                                                                                                                                                                                                               | 558.56       |             |            |             |   |            |            |            |   |            |             |            |   |            |             |            |   |            |             |            |   |            |             |             |   |            |              |            |   |            |            |            |   |            |            |            |   |            |            |            |   |            |            |            |   |            |            |            |   |            |            |            |                                                                                                                                                                                                                                                                                                                                                                                                                                                                                                                                                                                                                                                                                                                        |           |            |            |        |            |            |            |        |            |            |            |        |            |            |            |                                                                                                                                                                                                                                                                                                                                                                                                                                                                                                                                                                                                                                                                                                                                                                                                                                                                                                                                                                               |            |            |           |         |            |            |            |                                                                                                                                                                                                                                                                                                                                                                                                                                                                                                                                                                                                                                                                                                                                                                                                                                                                                                                                                |         |         |         |         |         |         |         |         |         |         |         |                   |         |         |         |         |         |         |         |         |         |         |         |         |         |         |         |         |         |         |         |         |         |         |         |         |         |         |          |         |   |        |        |   |          |  |
| 736.08                                                                                                                                            | 794.61                                                                                                                                                                                                                                                                                                                                                                                                                                                                                                                                                                                                                                                                                                                                                                                                                                                                                                                                                                                                                                                                                                                                                                                                                                                                                                                                                                                                                                                                                                                                                               | 823.57       |             |            |             |   |            |            |            |   |            |             |            |   |            |             |            |   |            |             |            |   |            |             |             |   |            |              |            |   |            |            |            |   |            |            |            |   |            |            |            |   |            |            |            |   |            |            |            |   |            |            |            |                                                                                                                                                                                                                                                                                                                                                                                                                                                                                                                                                                                                                                                                                                                        |           |            |            |        |            |            |            |        |            |            |            |        |            |            |            |                                                                                                                                                                                                                                                                                                                                                                                                                                                                                                                                                                                                                                                                                                                                                                                                                                                                                                                                                                               |            |            |           |         |            |            |            |                                                                                                                                                                                                                                                                                                                                                                                                                                                                                                                                                                                                                                                                                                                                                                                                                                                                                                                                                |         |         |         |         |         |         |         |         |         |         |         |                   |         |         |         |         |         |         |         |         |         |         |         |         |         |         |         |         |         |         |         |         |         |         |         |         |         |         |          |         |   |        |        |   |          |  |
| 934.75                                                                                                                                            | 972.91                                                                                                                                                                                                                                                                                                                                                                                                                                                                                                                                                                                                                                                                                                                                                                                                                                                                                                                                                                                                                                                                                                                                                                                                                                                                                                                                                                                                                                                                                                                                                               | 978.59       |             |            |             |   |            |            |            |   |            |             |            |   |            |             |            |   |            |             |            |   |            |             |             |   |            |              |            |   |            |            |            |   |            |            |            |   |            |            |            |   |            |            |            |   |            |            |            |   |            |            |            |                                                                                                                                                                                                                                                                                                                                                                                                                                                                                                                                                                                                                                                                                                                        |           |            |            |        |            |            |            |        |            |            |            |        |            |            |            |                                                                                                                                                                                                                                                                                                                                                                                                                                                                                                                                                                                                                                                                                                                                                                                                                                                                                                                                                                               |            |            |           |         |            |            |            |                                                                                                                                                                                                                                                                                                                                                                                                                                                                                                                                                                                                                                                                                                                                                                                                                                                                                                                                                |         |         |         |         |         |         |         |         |         |         |         |                   |         |         |         |         |         |         |         |         |         |         |         |         |         |         |         |         |         |         |         |         |         |         |         |         |         |         |          |         |   |        |        |   |          |  |
| 1007.65                                                                                                                                           | 1030.66                                                                                                                                                                                                                                                                                                                                                                                                                                                                                                                                                                                                                                                                                                                                                                                                                                                                                                                                                                                                                                                                                                                                                                                                                                                                                                                                                                                                                                                                                                                                                              | 1079.43      |             |            |             |   |            |            |            |   |            |             |            |   |            |             |            |   |            |             |            |   |            |             |             |   |            |              |            |   |            |            |            |   |            |            |            |   |            |            |            |   |            |            |            |   |            |            |            |   |            |            |            |                                                                                                                                                                                                                                                                                                                                                                                                                                                                                                                                                                                                                                                                                                                        |           |            |            |        |            |            |            |        |            |            |            |        |            |            |            |                                                                                                                                                                                                                                                                                                                                                                                                                                                                                                                                                                                                                                                                                                                                                                                                                                                                                                                                                                               |            |            |           |         |            |            |            |                                                                                                                                                                                                                                                                                                                                                                                                                                                                                                                                                                                                                                                                                                                                                                                                                                                                                                                                                |         |         |         |         |         |         |         |         |         |         |         |                   |         |         |         |         |         |         |         |         |         |         |         |         |         |         |         |         |         |         |         |         |         |         |         |         |         |         |          |         |   |        |        |   |          |  |
| 1110.19                                                                                                                                           | 1117.41                                                                                                                                                                                                                                                                                                                                                                                                                                                                                                                                                                                                                                                                                                                                                                                                                                                                                                                                                                                                                                                                                                                                                                                                                                                                                                                                                                                                                                                                                                                                                              | 1196.56      |             |            |             |   |            |            |            |   |            |             |            |   |            |             |            |   |            |             |            |   |            |             |             |   |            |              |            |   |            |            |            |   |            |            |            |   |            |            |            |   |            |            |            |   |            |            |            |   |            |            |            |                                                                                                                                                                                                                                                                                                                                                                                                                                                                                                                                                                                                                                                                                                                        |           |            |            |        |            |            |            |        |            |            |            |        |            |            |            |                                                                                                                                                                                                                                                                                                                                                                                                                                                                                                                                                                                                                                                                                                                                                                                                                                                                                                                                                                               |            |            |           |         |            |            |            |                                                                                                                                                                                                                                                                                                                                                                                                                                                                                                                                                                                                                                                                                                                                                                                                                                                                                                                                                |         |         |         |         |         |         |         |         |         |         |         |                   |         |         |         |         |         |         |         |         |         |         |         |         |         |         |         |         |         |         |         |         |         |         |         |         |         |         |          |         |   |        |        |   |          |  |
| 1208.93                                                                                                                                           | 1252.80                                                                                                                                                                                                                                                                                                                                                                                                                                                                                                                                                                                                                                                                                                                                                                                                                                                                                                                                                                                                                                                                                                                                                                                                                                                                                                                                                                                                                                                                                                                                                              | 1278.38      |             |            |             |   |            |            |            |   |            |             |            |   |            |             |            |   |            |             |            |   |            |             |             |   |            |              |            |   |            |            |            |   |            |            |            |   |            |            |            |   |            |            |            |   |            |            |            |   |            |            |            |                                                                                                                                                                                                                                                                                                                                                                                                                                                                                                                                                                                                                                                                                                                        |           |            |            |        |            |            |            |        |            |            |            |        |            |            |            |                                                                                                                                                                                                                                                                                                                                                                                                                                                                                                                                                                                                                                                                                                                                                                                                                                                                                                                                                                               |            |            |           |         |            |            |            |                                                                                                                                                                                                                                                                                                                                                                                                                                                                                                                                                                                                                                                                                                                                                                                                                                                                                                                                                |         |         |         |         |         |         |         |         |         |         |         |                   |         |         |         |         |         |         |         |         |         |         |         |         |         |         |         |         |         |         |         |         |         |         |         |         |         |         |          |         |   |        |        |   |          |  |
| 1299.66                                                                                                                                           | 1319.50                                                                                                                                                                                                                                                                                                                                                                                                                                                                                                                                                                                                                                                                                                                                                                                                                                                                                                                                                                                                                                                                                                                                                                                                                                                                                                                                                                                                                                                                                                                                                              | 1339.72      |             |            |             |   |            |            |            |   |            |             |            |   |            |             |            |   |            |             |            |   |            |             |             |   |            |              |            |   |            |            |            |   |            |            |            |   |            |            |            |   |            |            |            |   |            |            |            |   |            |            |            |                                                                                                                                                                                                                                                                                                                                                                                                                                                                                                                                                                                                                                                                                                                        |           |            |            |        |            |            |            |        |            |            |            |        |            |            |            |                                                                                                                                                                                                                                                                                                                                                                                                                                                                                                                                                                                                                                                                                                                                                                                                                                                                                                                                                                               |            |            |           |         |            |            |            |                                                                                                                                                                                                                                                                                                                                                                                                                                                                                                                                                                                                                                                                                                                                                                                                                                                                                                                                                |         |         |         |         |         |         |         |         |         |         |         |                   |         |         |         |         |         |         |         |         |         |         |         |         |         |         |         |         |         |         |         |         |         |         |         |         |         |         |          |         |   |        |        |   |          |  |
| 1365.62                                                                                                                                           | 1412.67                                                                                                                                                                                                                                                                                                                                                                                                                                                                                                                                                                                                                                                                                                                                                                                                                                                                                                                                                                                                                                                                                                                                                                                                                                                                                                                                                                                                                                                                                                                                                              | 1417.69      |             |            |             |   |            |            |            |   |            |             |            |   |            |             |            |   |            |             |            |   |            |             |             |   |            |              |            |   |            |            |            |   |            |            |            |   |            |            |            |   |            |            |            |   |            |            |            |   |            |            |            |                                                                                                                                                                                                                                                                                                                                                                                                                                                                                                                                                                                                                                                                                                                        |           |            |            |        |            |            |            |        |            |            |            |        |            |            |            |                                                                                                                                                                                                                                                                                                                                                                                                                                                                                                                                                                                                                                                                                                                                                                                                                                                                                                                                                                               |            |            |           |         |            |            |            |                                                                                                                                                                                                                                                                                                                                                                                                                                                                                                                                                                                                                                                                                                                                                                                                                                                                                                                                                |         |         |         |         |         |         |         |         |         |         |         |                   |         |         |         |         |         |         |         |         |         |         |         |         |         |         |         |         |         |         |         |         |         |         |         |         |         |         |          |         |   |        |        |   |          |  |
| 1458.12                                                                                                                                           | 1479.63                                                                                                                                                                                                                                                                                                                                                                                                                                                                                                                                                                                                                                                                                                                                                                                                                                                                                                                                                                                                                                                                                                                                                                                                                                                                                                                                                                                                                                                                                                                                                              | 493.99       |             |            |             |   |            |            |            |   |            |             |            |   |            |             |            |   |            |             |            |   |            |             |             |   |            |              |            |   |            |            |            |   |            |            |            |   |            |            |            |   |            |            |            |   |            |            |            |   |            |            |            |                                                                                                                                                                                                                                                                                                                                                                                                                                                                                                                                                                                                                                                                                                                        |           |            |            |        |            |            |            |        |            |            |            |        |            |            |            |                                                                                                                                                                                                                                                                                                                                                                                                                                                                                                                                                                                                                                                                                                                                                                                                                                                                                                                                                                               |            |            |           |         |            |            |            |                                                                                                                                                                                                                                                                                                                                                                                                                                                                                                                                                                                                                                                                                                                                                                                                                                                                                                                                                |         |         |         |         |         |         |         |         |         |         |         |                   |         |         |         |         |         |         |         |         |         |         |         |         |         |         |         |         |         |         |         |         |         |         |         |         |         |         |          |         |   |        |        |   |          |  |
| 1502.45                                                                                                                                           | 1512.18                                                                                                                                                                                                                                                                                                                                                                                                                                                                                                                                                                                                                                                                                                                                                                                                                                                                                                                                                                                                                                                                                                                                                                                                                                                                                                                                                                                                                                                                                                                                                              | 3049.38      |             |            |             |   |            |            |            |   |            |             |            |   |            |             |            |   |            |             |            |   |            |             |             |   |            |              |            |   |            |            |            |   |            |            |            |   |            |            |            |   |            |            |            |   |            |            |            |   |            |            |            |                                                                                                                                                                                                                                                                                                                                                                                                                                                                                                                                                                                                                                                                                                                        |           |            |            |        |            |            |            |        |            |            |            |        |            |            |            |                                                                                                                                                                                                                                                                                                                                                                                                                                                                                                                                                                                                                                                                                                                                                                                                                                                                                                                                                                               |            |            |           |         |            |            |            |                                                                                                                                                                                                                                                                                                                                                                                                                                                                                                                                                                                                                                                                                                                                                                                                                                                                                                                                                |         |         |         |         |         |         |         |         |         |         |         |                   |         |         |         |         |         |         |         |         |         |         |         |         |         |         |         |         |         |         |         |         |         |         |         |         |         |         |          |         |   |        |        |   |          |  |
| 3059.51                                                                                                                                           | 3065.33                                                                                                                                                                                                                                                                                                                                                                                                                                                                                                                                                                                                                                                                                                                                                                                                                                                                                                                                                                                                                                                                                                                                                                                                                                                                                                                                                                                                                                                                                                                                                              | 3092.16      |             |            |             |   |            |            |            |   |            |             |            |   |            |             |            |   |            |             |            |   |            |             |             |   |            |              |            |   |            |            |            |   |            |            |            |   |            |            |            |   |            |            |            |   |            |            |            |   |            |            |            |                                                                                                                                                                                                                                                                                                                                                                                                                                                                                                                                                                                                                                                                                                                        |           |            |            |        |            |            |            |        |            |            |            |        |            |            |            |                                                                                                                                                                                                                                                                                                                                                                                                                                                                                                                                                                                                                                                                                                                                                                                                                                                                                                                                                                               |            |            |           |         |            |            |            |                                                                                                                                                                                                                                                                                                                                                                                                                                                                                                                                                                                                                                                                                                                                                                                                                                                                                                                                                |         |         |         |         |         |         |         |         |         |         |         |                   |         |         |         |         |         |         |         |         |         |         |         |         |         |         |         |         |         |         |         |         |         |         |         |         |         |         |          |         |   |        |        |   |          |  |
| 3097.41                                                                                                                                           | 3105.15                                                                                                                                                                                                                                                                                                                                                                                                                                                                                                                                                                                                                                                                                                                                                                                                                                                                                                                                                                                                                                                                                                                                                                                                                                                                                                                                                                                                                                                                                                                                                              | 3134.55      |             |            |             |   |            |            |            |   |            |             |            |   |            |             |            |   |            |             |            |   |            |             |             |   |            |              |            |   |            |            |            |   |            |            |            |   |            |            |            |   |            |            |            |   |            |            |            |   |            |            |            |                                                                                                                                                                                                                                                                                                                                                                                                                                                                                                                                                                                                                                                                                                                        |           |            |            |        |            |            |            |        |            |            |            |        |            |            |            |                                                                                                                                                                                                                                                                                                                                                                                                                                                                                                                                                                                                                                                                                                                                                                                                                                                                                                                                                                               |            |            |           |         |            |            |            |                                                                                                                                                                                                                                                                                                                                                                                                                                                                                                                                                                                                                                                                                                                                                                                                                                                                                                                                                |         |         |         |         |         |         |         |         |         |         |         |                   |         |         |         |         |         |         |         |         |         |         |         |         |         |         |         |         |         |         |         |         |         |         |         |         |         |         |          |         |   |        |        |   |          |  |
| 3147.81                                                                                                                                           | 3164.65                                                                                                                                                                                                                                                                                                                                                                                                                                                                                                                                                                                                                                                                                                                                                                                                                                                                                                                                                                                                                                                                                                                                                                                                                                                                                                                                                                                                                                                                                                                                                              | 3851.28      |             |            |             |   |            |            |            |   |            |             |            |   |            |             |            |   |            |             |            |   |            |             |             |   |            |              |            |   |            |            |            |   |            |            |            |   |            |            |            |   |            |            |            |   |            |            |            |   |            |            |            |                                                                                                                                                                                                                                                                                                                                                                                                                                                                                                                                                                                                                                                                                                                        |           |            |            |        |            |            |            |        |            |            |            |        |            |            |            |                                                                                                                                                                                                                                                                                                                                                                                                                                                                                                                                                                                                                                                                                                                                                                                                                                                                                                                                                                               |            |            |           |         |            |            |            |                                                                                                                                                                                                                                                                                                                                                                                                                                                                                                                                                                                                                                                                                                                                                                                                                                                                                                                                                |         |         |         |         |         |         |         |         |         |         |         |                   |         |         |         |         |         |         |         |         |         |         |         |         |         |         |         |         |         |         |         |         |         |         |         |         |         |         |          |         |   |        |        |   |          |  |
| !                                                                                                                                                 | 118.43                                                                                                                                                                                                                                                                                                                                                                                                                                                                                                                                                                                                                                                                                                                                                                                                                                                                                                                                                                                                                                                                                                                                                                                                                                                                                                                                                                                                                                                                                                                                                               | 237.81       |             |            |             |   |            |            |            |   |            |             |            |   |            |             |            |   |            |             |            |   |            |             |             |   |            |              |            |   |            |            |            |   |            |            |            |   |            |            |            |   |            |            |            |   |            |            |            |   |            |            |            |                                                                                                                                                                                                                                                                                                                                                                                                                                                                                                                                                                                                                                                                                                                        |           |            |            |        |            |            |            |        |            |            |            |        |            |            |            |                                                                                                                                                                                                                                                                                                                                                                                                                                                                                                                                                                                                                                                                                                                                                                                                                                                                                                                                                                               |            |            |           |         |            |            |            |                                                                                                                                                                                                                                                                                                                                                                                                                                                                                                                                                                                                                                                                                                                                                                                                                                                                                                                                                |         |         |         |         |         |         |         |         |         |         |         |                   |         |         |         |         |         |         |         |         |         |         |         |         |         |         |         |         |         |         |         |         |         |         |         |         |         |         |          |         |   |        |        |   |          |  |
| !                                                                                                                                                 | Torsions                                                                                                                                                                                                                                                                                                                                                                                                                                                                                                                                                                                                                                                                                                                                                                                                                                                                                                                                                                                                                                                                                                                                                                                                                                                                                                                                                                                                                                                                                                                                                             |              |             |            |             |   |            |            |            |   |            |             |            |   |            |             |            |   |            |             |            |   |            |             |             |   |            |              |            |   |            |            |            |   |            |            |            |   |            |            |            |   |            |            |            |   |            |            |            |   |            |            |            |                                                                                                                                                                                                                                                                                                                                                                                                                                                                                                                                                                                                                                                                                                                        |           |            |            |        |            |            |            |        |            |            |            |        |            |            |            |                                                                                                                                                                                                                                                                                                                                                                                                                                                                                                                                                                                                                                                                                                                                                                                                                                                                                                                                                                               |            |            |           |         |            |            |            |                                                                                                                                                                                                                                                                                                                                                                                                                                                                                                                                                                                                                                                                                                                                                                                                                                                                                                                                                |         |         |         |         |         |         |         |         |         |         |         |                   |         |         |         |         |         |         |         |         |         |         |         |         |         |         |         |         |         |         |         |         |         |         |         |         |         |         |          |         |   |        |        |   |          |  |
| <p>OH + Formic acid + 1-Butene</p>  <p>+ OH</p>                | <table border="1"> <tbody> <tr><td>O</td><td>0.00000000</td><td>0.00000000</td><td>-0.00571069</td></tr> <tr><td>H</td><td>0.00000000</td><td>0.00000000</td><td>0.96571069</td></tr> <tr><td>O</td><td>-0.0764726</td><td>0.175471670</td><td>0.09622945</td></tr> <tr><td>C</td><td>0.0531058</td><td>0.034590623</td><td>1.42022032</td></tr> <tr><td>O</td><td>1.0902825</td><td>0.050749440</td><td>2.00881646</td></tr> <tr><td>H</td><td>0.8111887</td><td>0.289072363</td><td>-0.27298859</td></tr> <tr><td>H</td><td>-0.9311085</td><td>-0.097335781</td><td>1.88192236</td></tr> <tr><td>C</td><td>-0.0001742</td><td>-8.287E-05</td><td>-5.112E-05</td></tr> <tr><td>C</td><td>-1.753E-05</td><td>-0.0003164</td><td>1.52049125</td></tr> <tr><td>C</td><td>1.3601832</td><td>0.00014863</td><td>2.15352469</td></tr> <tr><td>C</td><td>2.51874127</td><td>0.00073991</td><td>1.51187936</td></tr> <tr><td>H</td><td>-1.0183445</td><td>-0.0004479</td><td>-0.3858087</td></tr> <tr><td>H</td><td>0.50907585</td><td>-0.8810468</td><td>-0.3915306</td></tr> <tr><td>H</td><td>0.5083415</td><td>0.88142428</td><td>-0.3912617</td></tr> <tr><td>H</td><td>-0.5517142</td><td>0.86826892</td><td>1.8918808</td></tr> <tr><td>H</td><td>-0.5509953</td><td>-0.8694723</td><td>1.89161272</td></tr> <tr><td>H</td><td>1.36738514</td><td>-2.699E-05</td><td>3.23933663</td></tr> <tr><td>H</td><td>3.45592633</td><td>0.00104351</td><td>2.0512206</td></tr> <tr><td>H</td><td>2.57642953</td><td>0.00094226</td><td>0.43106708</td></tr> </tbody> </table> | O            | 0.00000000  | 0.00000000 | -0.00571069 | H | 0.00000000 | 0.00000000 | 0.96571069 | O | -0.0764726 | 0.175471670 | 0.09622945 | C | 0.0531058  | 0.034590623 | 1.42022032 | O | 1.0902825  | 0.050749440 | 2.00881646 | H | 0.8111887  | 0.289072363 | -0.27298859 | H | -0.9311085 | -0.097335781 | 1.88192236 | C | -0.0001742 | -8.287E-05 | -5.112E-05 | C | -1.753E-05 | -0.0003164 | 1.52049125 | C | 1.3601832  | 0.00014863 | 2.15352469 | C | 2.51874127 | 0.00073991 | 1.51187936 | H | -1.0183445 | -0.0004479 | -0.3858087 | H | 0.50907585 | -0.8810468 | -0.3915306 | H                                                                                                                                                                                                                                                                                                                                                                                                                                                                                                                                                                                                                                                                                                                      | 0.5083415 | 0.88142428 | -0.3912617 | H      | -0.5517142 | 0.86826892 | 1.8918808  | H      | -0.5509953 | -0.8694723 | 1.89161272 | H      | 1.36738514 | -2.699E-05 | 3.23933663 | H                                                                                                                                                                                                                                                                                                                                                                                                                                                                                                                                                                                                                                                                                                                                                                                                                                                                                                                                                                             | 3.45592633 | 0.00104351 | 2.0512206 | H       | 2.57642953 | 0.00094226 | 0.43106708 | <table border="1"> <tbody> <tr><td>3776.00</td></tr> <tr><td>645.59</td><td>1077.81</td><td>1164.30</td></tr> <tr><td>1323.84</td><td>1418.68</td><td>1881.20</td></tr> <tr><td>3099.91</td><td>3799.57</td><td></td></tr> <tr><td>!</td><td colspan="2">Torsions 680.90 !</td></tr> <tr><td>299.14</td><td>546.33</td><td>569.16</td></tr> <tr><td>857.37</td><td>966.78</td><td>1008.83</td></tr> <tr><td>1034.78</td><td>1047.28</td><td>1111.79</td></tr> <tr><td>1150.60</td><td>1292.45</td><td>1333.69</td></tr> <tr><td>1379.83</td><td>1411.66</td><td>1455.24</td></tr> <tr><td>1479.40</td><td>1502.34</td><td>1514.07</td></tr> <tr><td>1736.20</td><td>3045.26</td><td>3065.53</td></tr> <tr><td>3068.56</td><td>3133.54</td><td>3141.30</td></tr> <tr><td>3158.65</td><td>3175.71</td><td>3254.10</td></tr> <tr><td>!</td><td>174.80</td><td>281.55</td></tr> <tr><td>!</td><td colspan="2">Torsions</td></tr> </tbody> </table> | 3776.00 | 645.59  | 1077.81 | 1164.30 | 1323.84 | 1418.68 | 1881.20 | 3099.91 | 3799.57 |         | !       | Torsions 680.90 ! |         | 299.14  | 546.33  | 569.16  | 857.37  | 966.78  | 1008.83 | 1034.78 | 1047.28 | 1111.79 | 1150.60 | 1292.45 | 1333.69 | 1379.83 | 1411.66 | 1455.24 | 1479.40 | 1502.34 | 1514.07 | 1736.20 | 3045.26 | 3065.53 | 3068.56 | 3133.54 | 3141.30 | 3158.65 | 3175.71  | 3254.10 | ! | 174.80 | 281.55 | ! | Torsions |  |
| O                                                                                                                                                 | 0.00000000                                                                                                                                                                                                                                                                                                                                                                                                                                                                                                                                                                                                                                                                                                                                                                                                                                                                                                                                                                                                                                                                                                                                                                                                                                                                                                                                                                                                                                                                                                                                                           | 0.00000000   | -0.00571069 |            |             |   |            |            |            |   |            |             |            |   |            |             |            |   |            |             |            |   |            |             |             |   |            |              |            |   |            |            |            |   |            |            |            |   |            |            |            |   |            |            |            |   |            |            |            |   |            |            |            |                                                                                                                                                                                                                                                                                                                                                                                                                                                                                                                                                                                                                                                                                                                        |           |            |            |        |            |            |            |        |            |            |            |        |            |            |            |                                                                                                                                                                                                                                                                                                                                                                                                                                                                                                                                                                                                                                                                                                                                                                                                                                                                                                                                                                               |            |            |           |         |            |            |            |                                                                                                                                                                                                                                                                                                                                                                                                                                                                                                                                                                                                                                                                                                                                                                                                                                                                                                                                                |         |         |         |         |         |         |         |         |         |         |         |                   |         |         |         |         |         |         |         |         |         |         |         |         |         |         |         |         |         |         |         |         |         |         |         |         |         |         |          |         |   |        |        |   |          |  |
| H                                                                                                                                                 | 0.00000000                                                                                                                                                                                                                                                                                                                                                                                                                                                                                                                                                                                                                                                                                                                                                                                                                                                                                                                                                                                                                                                                                                                                                                                                                                                                                                                                                                                                                                                                                                                                                           | 0.00000000   | 0.96571069  |            |             |   |            |            |            |   |            |             |            |   |            |             |            |   |            |             |            |   |            |             |             |   |            |              |            |   |            |            |            |   |            |            |            |   |            |            |            |   |            |            |            |   |            |            |            |   |            |            |            |                                                                                                                                                                                                                                                                                                                                                                                                                                                                                                                                                                                                                                                                                                                        |           |            |            |        |            |            |            |        |            |            |            |        |            |            |            |                                                                                                                                                                                                                                                                                                                                                                                                                                                                                                                                                                                                                                                                                                                                                                                                                                                                                                                                                                               |            |            |           |         |            |            |            |                                                                                                                                                                                                                                                                                                                                                                                                                                                                                                                                                                                                                                                                                                                                                                                                                                                                                                                                                |         |         |         |         |         |         |         |         |         |         |         |                   |         |         |         |         |         |         |         |         |         |         |         |         |         |         |         |         |         |         |         |         |         |         |         |         |         |         |          |         |   |        |        |   |          |  |
| O                                                                                                                                                 | -0.0764726                                                                                                                                                                                                                                                                                                                                                                                                                                                                                                                                                                                                                                                                                                                                                                                                                                                                                                                                                                                                                                                                                                                                                                                                                                                                                                                                                                                                                                                                                                                                                           | 0.175471670  | 0.09622945  |            |             |   |            |            |            |   |            |             |            |   |            |             |            |   |            |             |            |   |            |             |             |   |            |              |            |   |            |            |            |   |            |            |            |   |            |            |            |   |            |            |            |   |            |            |            |   |            |            |            |                                                                                                                                                                                                                                                                                                                                                                                                                                                                                                                                                                                                                                                                                                                        |           |            |            |        |            |            |            |        |            |            |            |        |            |            |            |                                                                                                                                                                                                                                                                                                                                                                                                                                                                                                                                                                                                                                                                                                                                                                                                                                                                                                                                                                               |            |            |           |         |            |            |            |                                                                                                                                                                                                                                                                                                                                                                                                                                                                                                                                                                                                                                                                                                                                                                                                                                                                                                                                                |         |         |         |         |         |         |         |         |         |         |         |                   |         |         |         |         |         |         |         |         |         |         |         |         |         |         |         |         |         |         |         |         |         |         |         |         |         |         |          |         |   |        |        |   |          |  |
| C                                                                                                                                                 | 0.0531058                                                                                                                                                                                                                                                                                                                                                                                                                                                                                                                                                                                                                                                                                                                                                                                                                                                                                                                                                                                                                                                                                                                                                                                                                                                                                                                                                                                                                                                                                                                                                            | 0.034590623  | 1.42022032  |            |             |   |            |            |            |   |            |             |            |   |            |             |            |   |            |             |            |   |            |             |             |   |            |              |            |   |            |            |            |   |            |            |            |   |            |            |            |   |            |            |            |   |            |            |            |   |            |            |            |                                                                                                                                                                                                                                                                                                                                                                                                                                                                                                                                                                                                                                                                                                                        |           |            |            |        |            |            |            |        |            |            |            |        |            |            |            |                                                                                                                                                                                                                                                                                                                                                                                                                                                                                                                                                                                                                                                                                                                                                                                                                                                                                                                                                                               |            |            |           |         |            |            |            |                                                                                                                                                                                                                                                                                                                                                                                                                                                                                                                                                                                                                                                                                                                                                                                                                                                                                                                                                |         |         |         |         |         |         |         |         |         |         |         |                   |         |         |         |         |         |         |         |         |         |         |         |         |         |         |         |         |         |         |         |         |         |         |         |         |         |         |          |         |   |        |        |   |          |  |
| O                                                                                                                                                 | 1.0902825                                                                                                                                                                                                                                                                                                                                                                                                                                                                                                                                                                                                                                                                                                                                                                                                                                                                                                                                                                                                                                                                                                                                                                                                                                                                                                                                                                                                                                                                                                                                                            | 0.050749440  | 2.00881646  |            |             |   |            |            |            |   |            |             |            |   |            |             |            |   |            |             |            |   |            |             |             |   |            |              |            |   |            |            |            |   |            |            |            |   |            |            |            |   |            |            |            |   |            |            |            |   |            |            |            |                                                                                                                                                                                                                                                                                                                                                                                                                                                                                                                                                                                                                                                                                                                        |           |            |            |        |            |            |            |        |            |            |            |        |            |            |            |                                                                                                                                                                                                                                                                                                                                                                                                                                                                                                                                                                                                                                                                                                                                                                                                                                                                                                                                                                               |            |            |           |         |            |            |            |                                                                                                                                                                                                                                                                                                                                                                                                                                                                                                                                                                                                                                                                                                                                                                                                                                                                                                                                                |         |         |         |         |         |         |         |         |         |         |         |                   |         |         |         |         |         |         |         |         |         |         |         |         |         |         |         |         |         |         |         |         |         |         |         |         |         |         |          |         |   |        |        |   |          |  |
| H                                                                                                                                                 | 0.8111887                                                                                                                                                                                                                                                                                                                                                                                                                                                                                                                                                                                                                                                                                                                                                                                                                                                                                                                                                                                                                                                                                                                                                                                                                                                                                                                                                                                                                                                                                                                                                            | 0.289072363  | -0.27298859 |            |             |   |            |            |            |   |            |             |            |   |            |             |            |   |            |             |            |   |            |             |             |   |            |              |            |   |            |            |            |   |            |            |            |   |            |            |            |   |            |            |            |   |            |            |            |   |            |            |            |                                                                                                                                                                                                                                                                                                                                                                                                                                                                                                                                                                                                                                                                                                                        |           |            |            |        |            |            |            |        |            |            |            |        |            |            |            |                                                                                                                                                                                                                                                                                                                                                                                                                                                                                                                                                                                                                                                                                                                                                                                                                                                                                                                                                                               |            |            |           |         |            |            |            |                                                                                                                                                                                                                                                                                                                                                                                                                                                                                                                                                                                                                                                                                                                                                                                                                                                                                                                                                |         |         |         |         |         |         |         |         |         |         |         |                   |         |         |         |         |         |         |         |         |         |         |         |         |         |         |         |         |         |         |         |         |         |         |         |         |         |         |          |         |   |        |        |   |          |  |
| H                                                                                                                                                 | -0.9311085                                                                                                                                                                                                                                                                                                                                                                                                                                                                                                                                                                                                                                                                                                                                                                                                                                                                                                                                                                                                                                                                                                                                                                                                                                                                                                                                                                                                                                                                                                                                                           | -0.097335781 | 1.88192236  |            |             |   |            |            |            |   |            |             |            |   |            |             |            |   |            |             |            |   |            |             |             |   |            |              |            |   |            |            |            |   |            |            |            |   |            |            |            |   |            |            |            |   |            |            |            |   |            |            |            |                                                                                                                                                                                                                                                                                                                                                                                                                                                                                                                                                                                                                                                                                                                        |           |            |            |        |            |            |            |        |            |            |            |        |            |            |            |                                                                                                                                                                                                                                                                                                                                                                                                                                                                                                                                                                                                                                                                                                                                                                                                                                                                                                                                                                               |            |            |           |         |            |            |            |                                                                                                                                                                                                                                                                                                                                                                                                                                                                                                                                                                                                                                                                                                                                                                                                                                                                                                                                                |         |         |         |         |         |         |         |         |         |         |         |                   |         |         |         |         |         |         |         |         |         |         |         |         |         |         |         |         |         |         |         |         |         |         |         |         |         |         |          |         |   |        |        |   |          |  |
| C                                                                                                                                                 | -0.0001742                                                                                                                                                                                                                                                                                                                                                                                                                                                                                                                                                                                                                                                                                                                                                                                                                                                                                                                                                                                                                                                                                                                                                                                                                                                                                                                                                                                                                                                                                                                                                           | -8.287E-05   | -5.112E-05  |            |             |   |            |            |            |   |            |             |            |   |            |             |            |   |            |             |            |   |            |             |             |   |            |              |            |   |            |            |            |   |            |            |            |   |            |            |            |   |            |            |            |   |            |            |            |   |            |            |            |                                                                                                                                                                                                                                                                                                                                                                                                                                                                                                                                                                                                                                                                                                                        |           |            |            |        |            |            |            |        |            |            |            |        |            |            |            |                                                                                                                                                                                                                                                                                                                                                                                                                                                                                                                                                                                                                                                                                                                                                                                                                                                                                                                                                                               |            |            |           |         |            |            |            |                                                                                                                                                                                                                                                                                                                                                                                                                                                                                                                                                                                                                                                                                                                                                                                                                                                                                                                                                |         |         |         |         |         |         |         |         |         |         |         |                   |         |         |         |         |         |         |         |         |         |         |         |         |         |         |         |         |         |         |         |         |         |         |         |         |         |         |          |         |   |        |        |   |          |  |
| C                                                                                                                                                 | -1.753E-05                                                                                                                                                                                                                                                                                                                                                                                                                                                                                                                                                                                                                                                                                                                                                                                                                                                                                                                                                                                                                                                                                                                                                                                                                                                                                                                                                                                                                                                                                                                                                           | -0.0003164   | 1.52049125  |            |             |   |            |            |            |   |            |             |            |   |            |             |            |   |            |             |            |   |            |             |             |   |            |              |            |   |            |            |            |   |            |            |            |   |            |            |            |   |            |            |            |   |            |            |            |   |            |            |            |                                                                                                                                                                                                                                                                                                                                                                                                                                                                                                                                                                                                                                                                                                                        |           |            |            |        |            |            |            |        |            |            |            |        |            |            |            |                                                                                                                                                                                                                                                                                                                                                                                                                                                                                                                                                                                                                                                                                                                                                                                                                                                                                                                                                                               |            |            |           |         |            |            |            |                                                                                                                                                                                                                                                                                                                                                                                                                                                                                                                                                                                                                                                                                                                                                                                                                                                                                                                                                |         |         |         |         |         |         |         |         |         |         |         |                   |         |         |         |         |         |         |         |         |         |         |         |         |         |         |         |         |         |         |         |         |         |         |         |         |         |         |          |         |   |        |        |   |          |  |
| C                                                                                                                                                 | 1.3601832                                                                                                                                                                                                                                                                                                                                                                                                                                                                                                                                                                                                                                                                                                                                                                                                                                                                                                                                                                                                                                                                                                                                                                                                                                                                                                                                                                                                                                                                                                                                                            | 0.00014863   | 2.15352469  |            |             |   |            |            |            |   |            |             |            |   |            |             |            |   |            |             |            |   |            |             |             |   |            |              |            |   |            |            |            |   |            |            |            |   |            |            |            |   |            |            |            |   |            |            |            |   |            |            |            |                                                                                                                                                                                                                                                                                                                                                                                                                                                                                                                                                                                                                                                                                                                        |           |            |            |        |            |            |            |        |            |            |            |        |            |            |            |                                                                                                                                                                                                                                                                                                                                                                                                                                                                                                                                                                                                                                                                                                                                                                                                                                                                                                                                                                               |            |            |           |         |            |            |            |                                                                                                                                                                                                                                                                                                                                                                                                                                                                                                                                                                                                                                                                                                                                                                                                                                                                                                                                                |         |         |         |         |         |         |         |         |         |         |         |                   |         |         |         |         |         |         |         |         |         |         |         |         |         |         |         |         |         |         |         |         |         |         |         |         |         |         |          |         |   |        |        |   |          |  |
| C                                                                                                                                                 | 2.51874127                                                                                                                                                                                                                                                                                                                                                                                                                                                                                                                                                                                                                                                                                                                                                                                                                                                                                                                                                                                                                                                                                                                                                                                                                                                                                                                                                                                                                                                                                                                                                           | 0.00073991   | 1.51187936  |            |             |   |            |            |            |   |            |             |            |   |            |             |            |   |            |             |            |   |            |             |             |   |            |              |            |   |            |            |            |   |            |            |            |   |            |            |            |   |            |            |            |   |            |            |            |   |            |            |            |                                                                                                                                                                                                                                                                                                                                                                                                                                                                                                                                                                                                                                                                                                                        |           |            |            |        |            |            |            |        |            |            |            |        |            |            |            |                                                                                                                                                                                                                                                                                                                                                                                                                                                                                                                                                                                                                                                                                                                                                                                                                                                                                                                                                                               |            |            |           |         |            |            |            |                                                                                                                                                                                                                                                                                                                                                                                                                                                                                                                                                                                                                                                                                                                                                                                                                                                                                                                                                |         |         |         |         |         |         |         |         |         |         |         |                   |         |         |         |         |         |         |         |         |         |         |         |         |         |         |         |         |         |         |         |         |         |         |         |         |         |         |          |         |   |        |        |   |          |  |
| H                                                                                                                                                 | -1.0183445                                                                                                                                                                                                                                                                                                                                                                                                                                                                                                                                                                                                                                                                                                                                                                                                                                                                                                                                                                                                                                                                                                                                                                                                                                                                                                                                                                                                                                                                                                                                                           | -0.0004479   | -0.3858087  |            |             |   |            |            |            |   |            |             |            |   |            |             |            |   |            |             |            |   |            |             |             |   |            |              |            |   |            |            |            |   |            |            |            |   |            |            |            |   |            |            |            |   |            |            |            |   |            |            |            |                                                                                                                                                                                                                                                                                                                                                                                                                                                                                                                                                                                                                                                                                                                        |           |            |            |        |            |            |            |        |            |            |            |        |            |            |            |                                                                                                                                                                                                                                                                                                                                                                                                                                                                                                                                                                                                                                                                                                                                                                                                                                                                                                                                                                               |            |            |           |         |            |            |            |                                                                                                                                                                                                                                                                                                                                                                                                                                                                                                                                                                                                                                                                                                                                                                                                                                                                                                                                                |         |         |         |         |         |         |         |         |         |         |         |                   |         |         |         |         |         |         |         |         |         |         |         |         |         |         |         |         |         |         |         |         |         |         |         |         |         |         |          |         |   |        |        |   |          |  |
| H                                                                                                                                                 | 0.50907585                                                                                                                                                                                                                                                                                                                                                                                                                                                                                                                                                                                                                                                                                                                                                                                                                                                                                                                                                                                                                                                                                                                                                                                                                                                                                                                                                                                                                                                                                                                                                           | -0.8810468   | -0.3915306  |            |             |   |            |            |            |   |            |             |            |   |            |             |            |   |            |             |            |   |            |             |             |   |            |              |            |   |            |            |            |   |            |            |            |   |            |            |            |   |            |            |            |   |            |            |            |   |            |            |            |                                                                                                                                                                                                                                                                                                                                                                                                                                                                                                                                                                                                                                                                                                                        |           |            |            |        |            |            |            |        |            |            |            |        |            |            |            |                                                                                                                                                                                                                                                                                                                                                                                                                                                                                                                                                                                                                                                                                                                                                                                                                                                                                                                                                                               |            |            |           |         |            |            |            |                                                                                                                                                                                                                                                                                                                                                                                                                                                                                                                                                                                                                                                                                                                                                                                                                                                                                                                                                |         |         |         |         |         |         |         |         |         |         |         |                   |         |         |         |         |         |         |         |         |         |         |         |         |         |         |         |         |         |         |         |         |         |         |         |         |         |         |          |         |   |        |        |   |          |  |
| H                                                                                                                                                 | 0.5083415                                                                                                                                                                                                                                                                                                                                                                                                                                                                                                                                                                                                                                                                                                                                                                                                                                                                                                                                                                                                                                                                                                                                                                                                                                                                                                                                                                                                                                                                                                                                                            | 0.88142428   | -0.3912617  |            |             |   |            |            |            |   |            |             |            |   |            |             |            |   |            |             |            |   |            |             |             |   |            |              |            |   |            |            |            |   |            |            |            |   |            |            |            |   |            |            |            |   |            |            |            |   |            |            |            |                                                                                                                                                                                                                                                                                                                                                                                                                                                                                                                                                                                                                                                                                                                        |           |            |            |        |            |            |            |        |            |            |            |        |            |            |            |                                                                                                                                                                                                                                                                                                                                                                                                                                                                                                                                                                                                                                                                                                                                                                                                                                                                                                                                                                               |            |            |           |         |            |            |            |                                                                                                                                                                                                                                                                                                                                                                                                                                                                                                                                                                                                                                                                                                                                                                                                                                                                                                                                                |         |         |         |         |         |         |         |         |         |         |         |                   |         |         |         |         |         |         |         |         |         |         |         |         |         |         |         |         |         |         |         |         |         |         |         |         |         |         |          |         |   |        |        |   |          |  |
| H                                                                                                                                                 | -0.5517142                                                                                                                                                                                                                                                                                                                                                                                                                                                                                                                                                                                                                                                                                                                                                                                                                                                                                                                                                                                                                                                                                                                                                                                                                                                                                                                                                                                                                                                                                                                                                           | 0.86826892   | 1.8918808   |            |             |   |            |            |            |   |            |             |            |   |            |             |            |   |            |             |            |   |            |             |             |   |            |              |            |   |            |            |            |   |            |            |            |   |            |            |            |   |            |            |            |   |            |            |            |   |            |            |            |                                                                                                                                                                                                                                                                                                                                                                                                                                                                                                                                                                                                                                                                                                                        |           |            |            |        |            |            |            |        |            |            |            |        |            |            |            |                                                                                                                                                                                                                                                                                                                                                                                                                                                                                                                                                                                                                                                                                                                                                                                                                                                                                                                                                                               |            |            |           |         |            |            |            |                                                                                                                                                                                                                                                                                                                                                                                                                                                                                                                                                                                                                                                                                                                                                                                                                                                                                                                                                |         |         |         |         |         |         |         |         |         |         |         |                   |         |         |         |         |         |         |         |         |         |         |         |         |         |         |         |         |         |         |         |         |         |         |         |         |         |         |          |         |   |        |        |   |          |  |
| H                                                                                                                                                 | -0.5509953                                                                                                                                                                                                                                                                                                                                                                                                                                                                                                                                                                                                                                                                                                                                                                                                                                                                                                                                                                                                                                                                                                                                                                                                                                                                                                                                                                                                                                                                                                                                                           | -0.8694723   | 1.89161272  |            |             |   |            |            |            |   |            |             |            |   |            |             |            |   |            |             |            |   |            |             |             |   |            |              |            |   |            |            |            |   |            |            |            |   |            |            |            |   |            |            |            |   |            |            |            |   |            |            |            |                                                                                                                                                                                                                                                                                                                                                                                                                                                                                                                                                                                                                                                                                                                        |           |            |            |        |            |            |            |        |            |            |            |        |            |            |            |                                                                                                                                                                                                                                                                                                                                                                                                                                                                                                                                                                                                                                                                                                                                                                                                                                                                                                                                                                               |            |            |           |         |            |            |            |                                                                                                                                                                                                                                                                                                                                                                                                                                                                                                                                                                                                                                                                                                                                                                                                                                                                                                                                                |         |         |         |         |         |         |         |         |         |         |         |                   |         |         |         |         |         |         |         |         |         |         |         |         |         |         |         |         |         |         |         |         |         |         |         |         |         |         |          |         |   |        |        |   |          |  |
| H                                                                                                                                                 | 1.36738514                                                                                                                                                                                                                                                                                                                                                                                                                                                                                                                                                                                                                                                                                                                                                                                                                                                                                                                                                                                                                                                                                                                                                                                                                                                                                                                                                                                                                                                                                                                                                           | -2.699E-05   | 3.23933663  |            |             |   |            |            |            |   |            |             |            |   |            |             |            |   |            |             |            |   |            |             |             |   |            |              |            |   |            |            |            |   |            |            |            |   |            |            |            |   |            |            |            |   |            |            |            |   |            |            |            |                                                                                                                                                                                                                                                                                                                                                                                                                                                                                                                                                                                                                                                                                                                        |           |            |            |        |            |            |            |        |            |            |            |        |            |            |            |                                                                                                                                                                                                                                                                                                                                                                                                                                                                                                                                                                                                                                                                                                                                                                                                                                                                                                                                                                               |            |            |           |         |            |            |            |                                                                                                                                                                                                                                                                                                                                                                                                                                                                                                                                                                                                                                                                                                                                                                                                                                                                                                                                                |         |         |         |         |         |         |         |         |         |         |         |                   |         |         |         |         |         |         |         |         |         |         |         |         |         |         |         |         |         |         |         |         |         |         |         |         |         |         |          |         |   |        |        |   |          |  |
| H                                                                                                                                                 | 3.45592633                                                                                                                                                                                                                                                                                                                                                                                                                                                                                                                                                                                                                                                                                                                                                                                                                                                                                                                                                                                                                                                                                                                                                                                                                                                                                                                                                                                                                                                                                                                                                           | 0.00104351   | 2.0512206   |            |             |   |            |            |            |   |            |             |            |   |            |             |            |   |            |             |            |   |            |             |             |   |            |              |            |   |            |            |            |   |            |            |            |   |            |            |            |   |            |            |            |   |            |            |            |   |            |            |            |                                                                                                                                                                                                                                                                                                                                                                                                                                                                                                                                                                                                                                                                                                                        |           |            |            |        |            |            |            |        |            |            |            |        |            |            |            |                                                                                                                                                                                                                                                                                                                                                                                                                                                                                                                                                                                                                                                                                                                                                                                                                                                                                                                                                                               |            |            |           |         |            |            |            |                                                                                                                                                                                                                                                                                                                                                                                                                                                                                                                                                                                                                                                                                                                                                                                                                                                                                                                                                |         |         |         |         |         |         |         |         |         |         |         |                   |         |         |         |         |         |         |         |         |         |         |         |         |         |         |         |         |         |         |         |         |         |         |         |         |         |         |          |         |   |        |        |   |          |  |
| H                                                                                                                                                 | 2.57642953                                                                                                                                                                                                                                                                                                                                                                                                                                                                                                                                                                                                                                                                                                                                                                                                                                                                                                                                                                                                                                                                                                                                                                                                                                                                                                                                                                                                                                                                                                                                                           | 0.00094226   | 0.43106708  |            |             |   |            |            |            |   |            |             |            |   |            |             |            |   |            |             |            |   |            |             |             |   |            |              |            |   |            |            |            |   |            |            |            |   |            |            |            |   |            |            |            |   |            |            |            |   |            |            |            |                                                                                                                                                                                                                                                                                                                                                                                                                                                                                                                                                                                                                                                                                                                        |           |            |            |        |            |            |            |        |            |            |            |        |            |            |            |                                                                                                                                                                                                                                                                                                                                                                                                                                                                                                                                                                                                                                                                                                                                                                                                                                                                                                                                                                               |            |            |           |         |            |            |            |                                                                                                                                                                                                                                                                                                                                                                                                                                                                                                                                                                                                                                                                                                                                                                                                                                                                                                                                                |         |         |         |         |         |         |         |         |         |         |         |                   |         |         |         |         |         |         |         |         |         |         |         |         |         |         |         |         |         |         |         |         |         |         |         |         |         |         |          |         |   |        |        |   |          |  |
| 3776.00                                                                                                                                           |                                                                                                                                                                                                                                                                                                                                                                                                                                                                                                                                                                                                                                                                                                                                                                                                                                                                                                                                                                                                                                                                                                                                                                                                                                                                                                                                                                                                                                                                                                                                                                      |              |             |            |             |   |            |            |            |   |            |             |            |   |            |             |            |   |            |             |            |   |            |             |             |   |            |              |            |   |            |            |            |   |            |            |            |   |            |            |            |   |            |            |            |   |            |            |            |   |            |            |            |                                                                                                                                                                                                                                                                                                                                                                                                                                                                                                                                                                                                                                                                                                                        |           |            |            |        |            |            |            |        |            |            |            |        |            |            |            |                                                                                                                                                                                                                                                                                                                                                                                                                                                                                                                                                                                                                                                                                                                                                                                                                                                                                                                                                                               |            |            |           |         |            |            |            |                                                                                                                                                                                                                                                                                                                                                                                                                                                                                                                                                                                                                                                                                                                                                                                                                                                                                                                                                |         |         |         |         |         |         |         |         |         |         |         |                   |         |         |         |         |         |         |         |         |         |         |         |         |         |         |         |         |         |         |         |         |         |         |         |         |         |         |          |         |   |        |        |   |          |  |
| 645.59                                                                                                                                            | 1077.81                                                                                                                                                                                                                                                                                                                                                                                                                                                                                                                                                                                                                                                                                                                                                                                                                                                                                                                                                                                                                                                                                                                                                                                                                                                                                                                                                                                                                                                                                                                                                              | 1164.30      |             |            |             |   |            |            |            |   |            |             |            |   |            |             |            |   |            |             |            |   |            |             |             |   |            |              |            |   |            |            |            |   |            |            |            |   |            |            |            |   |            |            |            |   |            |            |            |   |            |            |            |                                                                                                                                                                                                                                                                                                                                                                                                                                                                                                                                                                                                                                                                                                                        |           |            |            |        |            |            |            |        |            |            |            |        |            |            |            |                                                                                                                                                                                                                                                                                                                                                                                                                                                                                                                                                                                                                                                                                                                                                                                                                                                                                                                                                                               |            |            |           |         |            |            |            |                                                                                                                                                                                                                                                                                                                                                                                                                                                                                                                                                                                                                                                                                                                                                                                                                                                                                                                                                |         |         |         |         |         |         |         |         |         |         |         |                   |         |         |         |         |         |         |         |         |         |         |         |         |         |         |         |         |         |         |         |         |         |         |         |         |         |         |          |         |   |        |        |   |          |  |
| 1323.84                                                                                                                                           | 1418.68                                                                                                                                                                                                                                                                                                                                                                                                                                                                                                                                                                                                                                                                                                                                                                                                                                                                                                                                                                                                                                                                                                                                                                                                                                                                                                                                                                                                                                                                                                                                                              | 1881.20      |             |            |             |   |            |            |            |   |            |             |            |   |            |             |            |   |            |             |            |   |            |             |             |   |            |              |            |   |            |            |            |   |            |            |            |   |            |            |            |   |            |            |            |   |            |            |            |   |            |            |            |                                                                                                                                                                                                                                                                                                                                                                                                                                                                                                                                                                                                                                                                                                                        |           |            |            |        |            |            |            |        |            |            |            |        |            |            |            |                                                                                                                                                                                                                                                                                                                                                                                                                                                                                                                                                                                                                                                                                                                                                                                                                                                                                                                                                                               |            |            |           |         |            |            |            |                                                                                                                                                                                                                                                                                                                                                                                                                                                                                                                                                                                                                                                                                                                                                                                                                                                                                                                                                |         |         |         |         |         |         |         |         |         |         |         |                   |         |         |         |         |         |         |         |         |         |         |         |         |         |         |         |         |         |         |         |         |         |         |         |         |         |         |          |         |   |        |        |   |          |  |
| 3099.91                                                                                                                                           | 3799.57                                                                                                                                                                                                                                                                                                                                                                                                                                                                                                                                                                                                                                                                                                                                                                                                                                                                                                                                                                                                                                                                                                                                                                                                                                                                                                                                                                                                                                                                                                                                                              |              |             |            |             |   |            |            |            |   |            |             |            |   |            |             |            |   |            |             |            |   |            |             |             |   |            |              |            |   |            |            |            |   |            |            |            |   |            |            |            |   |            |            |            |   |            |            |            |   |            |            |            |                                                                                                                                                                                                                                                                                                                                                                                                                                                                                                                                                                                                                                                                                                                        |           |            |            |        |            |            |            |        |            |            |            |        |            |            |            |                                                                                                                                                                                                                                                                                                                                                                                                                                                                                                                                                                                                                                                                                                                                                                                                                                                                                                                                                                               |            |            |           |         |            |            |            |                                                                                                                                                                                                                                                                                                                                                                                                                                                                                                                                                                                                                                                                                                                                                                                                                                                                                                                                                |         |         |         |         |         |         |         |         |         |         |         |                   |         |         |         |         |         |         |         |         |         |         |         |         |         |         |         |         |         |         |         |         |         |         |         |         |         |         |          |         |   |        |        |   |          |  |
| !                                                                                                                                                 | Torsions 680.90 !                                                                                                                                                                                                                                                                                                                                                                                                                                                                                                                                                                                                                                                                                                                                                                                                                                                                                                                                                                                                                                                                                                                                                                                                                                                                                                                                                                                                                                                                                                                                                    |              |             |            |             |   |            |            |            |   |            |             |            |   |            |             |            |   |            |             |            |   |            |             |             |   |            |              |            |   |            |            |            |   |            |            |            |   |            |            |            |   |            |            |            |   |            |            |            |   |            |            |            |                                                                                                                                                                                                                                                                                                                                                                                                                                                                                                                                                                                                                                                                                                                        |           |            |            |        |            |            |            |        |            |            |            |        |            |            |            |                                                                                                                                                                                                                                                                                                                                                                                                                                                                                                                                                                                                                                                                                                                                                                                                                                                                                                                                                                               |            |            |           |         |            |            |            |                                                                                                                                                                                                                                                                                                                                                                                                                                                                                                                                                                                                                                                                                                                                                                                                                                                                                                                                                |         |         |         |         |         |         |         |         |         |         |         |                   |         |         |         |         |         |         |         |         |         |         |         |         |         |         |         |         |         |         |         |         |         |         |         |         |         |         |          |         |   |        |        |   |          |  |
| 299.14                                                                                                                                            | 546.33                                                                                                                                                                                                                                                                                                                                                                                                                                                                                                                                                                                                                                                                                                                                                                                                                                                                                                                                                                                                                                                                                                                                                                                                                                                                                                                                                                                                                                                                                                                                                               | 569.16       |             |            |             |   |            |            |            |   |            |             |            |   |            |             |            |   |            |             |            |   |            |             |             |   |            |              |            |   |            |            |            |   |            |            |            |   |            |            |            |   |            |            |            |   |            |            |            |   |            |            |            |                                                                                                                                                                                                                                                                                                                                                                                                                                                                                                                                                                                                                                                                                                                        |           |            |            |        |            |            |            |        |            |            |            |        |            |            |            |                                                                                                                                                                                                                                                                                                                                                                                                                                                                                                                                                                                                                                                                                                                                                                                                                                                                                                                                                                               |            |            |           |         |            |            |            |                                                                                                                                                                                                                                                                                                                                                                                                                                                                                                                                                                                                                                                                                                                                                                                                                                                                                                                                                |         |         |         |         |         |         |         |         |         |         |         |                   |         |         |         |         |         |         |         |         |         |         |         |         |         |         |         |         |         |         |         |         |         |         |         |         |         |         |          |         |   |        |        |   |          |  |
| 857.37                                                                                                                                            | 966.78                                                                                                                                                                                                                                                                                                                                                                                                                                                                                                                                                                                                                                                                                                                                                                                                                                                                                                                                                                                                                                                                                                                                                                                                                                                                                                                                                                                                                                                                                                                                                               | 1008.83      |             |            |             |   |            |            |            |   |            |             |            |   |            |             |            |   |            |             |            |   |            |             |             |   |            |              |            |   |            |            |            |   |            |            |            |   |            |            |            |   |            |            |            |   |            |            |            |   |            |            |            |                                                                                                                                                                                                                                                                                                                                                                                                                                                                                                                                                                                                                                                                                                                        |           |            |            |        |            |            |            |        |            |            |            |        |            |            |            |                                                                                                                                                                                                                                                                                                                                                                                                                                                                                                                                                                                                                                                                                                                                                                                                                                                                                                                                                                               |            |            |           |         |            |            |            |                                                                                                                                                                                                                                                                                                                                                                                                                                                                                                                                                                                                                                                                                                                                                                                                                                                                                                                                                |         |         |         |         |         |         |         |         |         |         |         |                   |         |         |         |         |         |         |         |         |         |         |         |         |         |         |         |         |         |         |         |         |         |         |         |         |         |         |          |         |   |        |        |   |          |  |
| 1034.78                                                                                                                                           | 1047.28                                                                                                                                                                                                                                                                                                                                                                                                                                                                                                                                                                                                                                                                                                                                                                                                                                                                                                                                                                                                                                                                                                                                                                                                                                                                                                                                                                                                                                                                                                                                                              | 1111.79      |             |            |             |   |            |            |            |   |            |             |            |   |            |             |            |   |            |             |            |   |            |             |             |   |            |              |            |   |            |            |            |   |            |            |            |   |            |            |            |   |            |            |            |   |            |            |            |   |            |            |            |                                                                                                                                                                                                                                                                                                                                                                                                                                                                                                                                                                                                                                                                                                                        |           |            |            |        |            |            |            |        |            |            |            |        |            |            |            |                                                                                                                                                                                                                                                                                                                                                                                                                                                                                                                                                                                                                                                                                                                                                                                                                                                                                                                                                                               |            |            |           |         |            |            |            |                                                                                                                                                                                                                                                                                                                                                                                                                                                                                                                                                                                                                                                                                                                                                                                                                                                                                                                                                |         |         |         |         |         |         |         |         |         |         |         |                   |         |         |         |         |         |         |         |         |         |         |         |         |         |         |         |         |         |         |         |         |         |         |         |         |         |         |          |         |   |        |        |   |          |  |
| 1150.60                                                                                                                                           | 1292.45                                                                                                                                                                                                                                                                                                                                                                                                                                                                                                                                                                                                                                                                                                                                                                                                                                                                                                                                                                                                                                                                                                                                                                                                                                                                                                                                                                                                                                                                                                                                                              | 1333.69      |             |            |             |   |            |            |            |   |            |             |            |   |            |             |            |   |            |             |            |   |            |             |             |   |            |              |            |   |            |            |            |   |            |            |            |   |            |            |            |   |            |            |            |   |            |            |            |   |            |            |            |                                                                                                                                                                                                                                                                                                                                                                                                                                                                                                                                                                                                                                                                                                                        |           |            |            |        |            |            |            |        |            |            |            |        |            |            |            |                                                                                                                                                                                                                                                                                                                                                                                                                                                                                                                                                                                                                                                                                                                                                                                                                                                                                                                                                                               |            |            |           |         |            |            |            |                                                                                                                                                                                                                                                                                                                                                                                                                                                                                                                                                                                                                                                                                                                                                                                                                                                                                                                                                |         |         |         |         |         |         |         |         |         |         |         |                   |         |         |         |         |         |         |         |         |         |         |         |         |         |         |         |         |         |         |         |         |         |         |         |         |         |         |          |         |   |        |        |   |          |  |
| 1379.83                                                                                                                                           | 1411.66                                                                                                                                                                                                                                                                                                                                                                                                                                                                                                                                                                                                                                                                                                                                                                                                                                                                                                                                                                                                                                                                                                                                                                                                                                                                                                                                                                                                                                                                                                                                                              | 1455.24      |             |            |             |   |            |            |            |   |            |             |            |   |            |             |            |   |            |             |            |   |            |             |             |   |            |              |            |   |            |            |            |   |            |            |            |   |            |            |            |   |            |            |            |   |            |            |            |   |            |            |            |                                                                                                                                                                                                                                                                                                                                                                                                                                                                                                                                                                                                                                                                                                                        |           |            |            |        |            |            |            |        |            |            |            |        |            |            |            |                                                                                                                                                                                                                                                                                                                                                                                                                                                                                                                                                                                                                                                                                                                                                                                                                                                                                                                                                                               |            |            |           |         |            |            |            |                                                                                                                                                                                                                                                                                                                                                                                                                                                                                                                                                                                                                                                                                                                                                                                                                                                                                                                                                |         |         |         |         |         |         |         |         |         |         |         |                   |         |         |         |         |         |         |         |         |         |         |         |         |         |         |         |         |         |         |         |         |         |         |         |         |         |         |          |         |   |        |        |   |          |  |
| 1479.40                                                                                                                                           | 1502.34                                                                                                                                                                                                                                                                                                                                                                                                                                                                                                                                                                                                                                                                                                                                                                                                                                                                                                                                                                                                                                                                                                                                                                                                                                                                                                                                                                                                                                                                                                                                                              | 1514.07      |             |            |             |   |            |            |            |   |            |             |            |   |            |             |            |   |            |             |            |   |            |             |             |   |            |              |            |   |            |            |            |   |            |            |            |   |            |            |            |   |            |            |            |   |            |            |            |   |            |            |            |                                                                                                                                                                                                                                                                                                                                                                                                                                                                                                                                                                                                                                                                                                                        |           |            |            |        |            |            |            |        |            |            |            |        |            |            |            |                                                                                                                                                                                                                                                                                                                                                                                                                                                                                                                                                                                                                                                                                                                                                                                                                                                                                                                                                                               |            |            |           |         |            |            |            |                                                                                                                                                                                                                                                                                                                                                                                                                                                                                                                                                                                                                                                                                                                                                                                                                                                                                                                                                |         |         |         |         |         |         |         |         |         |         |         |                   |         |         |         |         |         |         |         |         |         |         |         |         |         |         |         |         |         |         |         |         |         |         |         |         |         |         |          |         |   |        |        |   |          |  |
| 1736.20                                                                                                                                           | 3045.26                                                                                                                                                                                                                                                                                                                                                                                                                                                                                                                                                                                                                                                                                                                                                                                                                                                                                                                                                                                                                                                                                                                                                                                                                                                                                                                                                                                                                                                                                                                                                              | 3065.53      |             |            |             |   |            |            |            |   |            |             |            |   |            |             |            |   |            |             |            |   |            |             |             |   |            |              |            |   |            |            |            |   |            |            |            |   |            |            |            |   |            |            |            |   |            |            |            |   |            |            |            |                                                                                                                                                                                                                                                                                                                                                                                                                                                                                                                                                                                                                                                                                                                        |           |            |            |        |            |            |            |        |            |            |            |        |            |            |            |                                                                                                                                                                                                                                                                                                                                                                                                                                                                                                                                                                                                                                                                                                                                                                                                                                                                                                                                                                               |            |            |           |         |            |            |            |                                                                                                                                                                                                                                                                                                                                                                                                                                                                                                                                                                                                                                                                                                                                                                                                                                                                                                                                                |         |         |         |         |         |         |         |         |         |         |         |                   |         |         |         |         |         |         |         |         |         |         |         |         |         |         |         |         |         |         |         |         |         |         |         |         |         |         |          |         |   |        |        |   |          |  |
| 3068.56                                                                                                                                           | 3133.54                                                                                                                                                                                                                                                                                                                                                                                                                                                                                                                                                                                                                                                                                                                                                                                                                                                                                                                                                                                                                                                                                                                                                                                                                                                                                                                                                                                                                                                                                                                                                              | 3141.30      |             |            |             |   |            |            |            |   |            |             |            |   |            |             |            |   |            |             |            |   |            |             |             |   |            |              |            |   |            |            |            |   |            |            |            |   |            |            |            |   |            |            |            |   |            |            |            |   |            |            |            |                                                                                                                                                                                                                                                                                                                                                                                                                                                                                                                                                                                                                                                                                                                        |           |            |            |        |            |            |            |        |            |            |            |        |            |            |            |                                                                                                                                                                                                                                                                                                                                                                                                                                                                                                                                                                                                                                                                                                                                                                                                                                                                                                                                                                               |            |            |           |         |            |            |            |                                                                                                                                                                                                                                                                                                                                                                                                                                                                                                                                                                                                                                                                                                                                                                                                                                                                                                                                                |         |         |         |         |         |         |         |         |         |         |         |                   |         |         |         |         |         |         |         |         |         |         |         |         |         |         |         |         |         |         |         |         |         |         |         |         |         |         |          |         |   |        |        |   |          |  |
| 3158.65                                                                                                                                           | 3175.71                                                                                                                                                                                                                                                                                                                                                                                                                                                                                                                                                                                                                                                                                                                                                                                                                                                                                                                                                                                                                                                                                                                                                                                                                                                                                                                                                                                                                                                                                                                                                              | 3254.10      |             |            |             |   |            |            |            |   |            |             |            |   |            |             |            |   |            |             |            |   |            |             |             |   |            |              |            |   |            |            |            |   |            |            |            |   |            |            |            |   |            |            |            |   |            |            |            |   |            |            |            |                                                                                                                                                                                                                                                                                                                                                                                                                                                                                                                                                                                                                                                                                                                        |           |            |            |        |            |            |            |        |            |            |            |        |            |            |            |                                                                                                                                                                                                                                                                                                                                                                                                                                                                                                                                                                                                                                                                                                                                                                                                                                                                                                                                                                               |            |            |           |         |            |            |            |                                                                                                                                                                                                                                                                                                                                                                                                                                                                                                                                                                                                                                                                                                                                                                                                                                                                                                                                                |         |         |         |         |         |         |         |         |         |         |         |                   |         |         |         |         |         |         |         |         |         |         |         |         |         |         |         |         |         |         |         |         |         |         |         |         |         |         |          |         |   |        |        |   |          |  |
| !                                                                                                                                                 | 174.80                                                                                                                                                                                                                                                                                                                                                                                                                                                                                                                                                                                                                                                                                                                                                                                                                                                                                                                                                                                                                                                                                                                                                                                                                                                                                                                                                                                                                                                                                                                                                               | 281.55       |             |            |             |   |            |            |            |   |            |             |            |   |            |             |            |   |            |             |            |   |            |             |             |   |            |              |            |   |            |            |            |   |            |            |            |   |            |            |            |   |            |            |            |   |            |            |            |   |            |            |            |                                                                                                                                                                                                                                                                                                                                                                                                                                                                                                                                                                                                                                                                                                                        |           |            |            |        |            |            |            |        |            |            |            |        |            |            |            |                                                                                                                                                                                                                                                                                                                                                                                                                                                                                                                                                                                                                                                                                                                                                                                                                                                                                                                                                                               |            |            |           |         |            |            |            |                                                                                                                                                                                                                                                                                                                                                                                                                                                                                                                                                                                                                                                                                                                                                                                                                                                                                                                                                |         |         |         |         |         |         |         |         |         |         |         |                   |         |         |         |         |         |         |         |         |         |         |         |         |         |         |         |         |         |         |         |         |         |         |         |         |         |         |          |         |   |        |        |   |          |  |
| !                                                                                                                                                 | Torsions                                                                                                                                                                                                                                                                                                                                                                                                                                                                                                                                                                                                                                                                                                                                                                                                                                                                                                                                                                                                                                                                                                                                                                                                                                                                                                                                                                                                                                                                                                                                                             |              |             |            |             |   |            |            |            |   |            |             |            |   |            |             |            |   |            |             |            |   |            |             |             |   |            |              |            |   |            |            |            |   |            |            |            |   |            |            |            |   |            |            |            |   |            |            |            |   |            |            |            |                                                                                                                                                                                                                                                                                                                                                                                                                                                                                                                                                                                                                                                                                                                        |           |            |            |        |            |            |            |        |            |            |            |        |            |            |            |                                                                                                                                                                                                                                                                                                                                                                                                                                                                                                                                                                                                                                                                                                                                                                                                                                                                                                                                                                               |            |            |           |         |            |            |            |                                                                                                                                                                                                                                                                                                                                                                                                                                                                                                                                                                                                                                                                                                                                                                                                                                                                                                                                                |         |         |         |         |         |         |         |         |         |         |         |                   |         |         |         |         |         |         |         |         |         |         |         |         |         |         |         |         |         |         |         |         |         |         |         |         |         |         |          |         |   |        |        |   |          |  |
| <p>OH + 5-methylTHF-2ol</p>  <p>H<sub>3</sub>C</p> <p>OH +</p> | <table border="1"> <tbody> <tr><td>O</td><td>0.00000000</td><td>0.00000000</td><td>-0.00571069</td></tr> <tr><td>H</td><td>0.00000000</td><td>0.00000000</td><td>0.96571069</td></tr> <tr><td>C</td><td>0.00028358</td><td>-0.001144</td><td>-0.0001249</td></tr> <tr><td>C</td><td>-0.0032182</td><td>-0.0007748</td><td>1.51360539</td></tr> <tr><td>H</td><td>1.02407629</td><td>-0.0013279</td><td>1.88712538</td></tr> <tr><td>C</td><td>-0.7974287</td><td>1.15357383</td><td>2.13818207</td></tr> <tr><td>C</td><td>-1.4798701</td><td>0.48981129</td><td>3.33384933</td></tr> <tr><td>C</td><td>-1.7430339</td><td>-0.8953466</td><td>2.77402096</td></tr> <tr><td>O</td><td>-2.9021967</td><td>-0.8189038</td><td>1.97650438</td></tr> <tr><td>O</td><td>-0.6144895</td><td>-1.2076519</td><td>2.00475315</td></tr> <tr><td>H</td><td>0.53533923</td><td>-0.8685227</td><td>-0.3838225</td></tr> <tr><td>H</td><td>0.48266026</td><td>0.90063253</td><td>-0.3795674</td></tr> <tr><td>H</td><td>-1.0260335</td><td>-0.0307837</td><td>-0.3671379</td></tr> </tbody> </table>                                                                                                                                                                                                                                                                                                                                                                                                                                                                                | O            | 0.00000000  | 0.00000000 | -0.00571069 | H | 0.00000000 | 0.00000000 | 0.96571069 | C | 0.00028358 | -0.001144   | -0.0001249 | C | -0.0032182 | -0.0007748  | 1.51360539 | H | 1.02407629 | -0.0013279  | 1.88712538 | C | -0.7974287 | 1.15357383  | 2.13818207  | C | -1.4798701 | 0.48981129   | 3.33384933 | C | -1.7430339 | -0.8953466 | 2.77402096 | O | -2.9021967 | -0.8189038 | 1.97650438 | O | -0.6144895 | -1.2076519 | 2.00475315 | H | 0.53533923 | -0.8685227 | -0.3838225 | H | 0.48266026 | 0.90063253 | -0.3795674 | H | -1.0260335 | -0.0307837 | -0.3671379 | <table border="1"> <tbody> <tr><td>3776.00</td></tr> <tr><td>54.27</td><td>187.04</td><td>339.41</td></tr> <tr><td>417.03</td><td>458.27</td><td>516.60</td></tr> <tr><td>615.00</td><td>785.05</td><td>829.06</td></tr> <tr><td>876.81</td><td>919.85</td><td>926.47</td></tr> <tr><td>976.14</td><td>1011.56</td><td>1033.32</td></tr> <tr><td>1057.29</td><td>1141.55</td><td>1147.09</td></tr> <tr><td>1163.60</td><td>1208.63</td><td>1235.80</td></tr> <tr><td>1257.52</td><td>1314.95</td><td>1345.70</td></tr> <tr><td>1366.88</td><td>1391.19</td><td>1399.58</td></tr> <tr><td>1414.97</td><td>1444.00</td><td>1482.11</td></tr> <tr><td>1488.82</td><td>1499.57</td><td>1505.50</td></tr> </tbody> </table> | 3776.00   | 54.27      | 187.04     | 339.41 | 417.03     | 458.27     | 516.60     | 615.00 | 785.05     | 829.06     | 876.81     | 919.85 | 926.47     | 976.14     | 1011.56    | 1033.32                                                                                                                                                                                                                                                                                                                                                                                                                                                                                                                                                                                                                                                                                                                                                                                                                                                                                                                                                                       | 1057.29    | 1141.55    | 1147.09   | 1163.60 | 1208.63    | 1235.80    | 1257.52    | 1314.95                                                                                                                                                                                                                                                                                                                                                                                                                                                                                                                                                                                                                                                                                                                                                                                                                                                                                                                                        | 1345.70 | 1366.88 | 1391.19 | 1399.58 | 1414.97 | 1444.00 | 1482.11 | 1488.82 | 1499.57 | 1505.50 |         |                   |         |         |         |         |         |         |         |         |         |         |         |         |         |         |         |         |         |         |         |         |         |         |         |         |         |         |          |         |   |        |        |   |          |  |
| O                                                                                                                                                 | 0.00000000                                                                                                                                                                                                                                                                                                                                                                                                                                                                                                                                                                                                                                                                                                                                                                                                                                                                                                                                                                                                                                                                                                                                                                                                                                                                                                                                                                                                                                                                                                                                                           | 0.00000000   | -0.00571069 |            |             |   |            |            |            |   |            |             |            |   |            |             |            |   |            |             |            |   |            |             |             |   |            |              |            |   |            |            |            |   |            |            |            |   |            |            |            |   |            |            |            |   |            |            |            |   |            |            |            |                                                                                                                                                                                                                                                                                                                                                                                                                                                                                                                                                                                                                                                                                                                        |           |            |            |        |            |            |            |        |            |            |            |        |            |            |            |                                                                                                                                                                                                                                                                                                                                                                                                                                                                                                                                                                                                                                                                                                                                                                                                                                                                                                                                                                               |            |            |           |         |            |            |            |                                                                                                                                                                                                                                                                                                                                                                                                                                                                                                                                                                                                                                                                                                                                                                                                                                                                                                                                                |         |         |         |         |         |         |         |         |         |         |         |                   |         |         |         |         |         |         |         |         |         |         |         |         |         |         |         |         |         |         |         |         |         |         |         |         |         |         |          |         |   |        |        |   |          |  |
| H                                                                                                                                                 | 0.00000000                                                                                                                                                                                                                                                                                                                                                                                                                                                                                                                                                                                                                                                                                                                                                                                                                                                                                                                                                                                                                                                                                                                                                                                                                                                                                                                                                                                                                                                                                                                                                           | 0.00000000   | 0.96571069  |            |             |   |            |            |            |   |            |             |            |   |            |             |            |   |            |             |            |   |            |             |             |   |            |              |            |   |            |            |            |   |            |            |            |   |            |            |            |   |            |            |            |   |            |            |            |   |            |            |            |                                                                                                                                                                                                                                                                                                                                                                                                                                                                                                                                                                                                                                                                                                                        |           |            |            |        |            |            |            |        |            |            |            |        |            |            |            |                                                                                                                                                                                                                                                                                                                                                                                                                                                                                                                                                                                                                                                                                                                                                                                                                                                                                                                                                                               |            |            |           |         |            |            |            |                                                                                                                                                                                                                                                                                                                                                                                                                                                                                                                                                                                                                                                                                                                                                                                                                                                                                                                                                |         |         |         |         |         |         |         |         |         |         |         |                   |         |         |         |         |         |         |         |         |         |         |         |         |         |         |         |         |         |         |         |         |         |         |         |         |         |         |          |         |   |        |        |   |          |  |
| C                                                                                                                                                 | 0.00028358                                                                                                                                                                                                                                                                                                                                                                                                                                                                                                                                                                                                                                                                                                                                                                                                                                                                                                                                                                                                                                                                                                                                                                                                                                                                                                                                                                                                                                                                                                                                                           | -0.001144    | -0.0001249  |            |             |   |            |            |            |   |            |             |            |   |            |             |            |   |            |             |            |   |            |             |             |   |            |              |            |   |            |            |            |   |            |            |            |   |            |            |            |   |            |            |            |   |            |            |            |   |            |            |            |                                                                                                                                                                                                                                                                                                                                                                                                                                                                                                                                                                                                                                                                                                                        |           |            |            |        |            |            |            |        |            |            |            |        |            |            |            |                                                                                                                                                                                                                                                                                                                                                                                                                                                                                                                                                                                                                                                                                                                                                                                                                                                                                                                                                                               |            |            |           |         |            |            |            |                                                                                                                                                                                                                                                                                                                                                                                                                                                                                                                                                                                                                                                                                                                                                                                                                                                                                                                                                |         |         |         |         |         |         |         |         |         |         |         |                   |         |         |         |         |         |         |         |         |         |         |         |         |         |         |         |         |         |         |         |         |         |         |         |         |         |         |          |         |   |        |        |   |          |  |
| C                                                                                                                                                 | -0.0032182                                                                                                                                                                                                                                                                                                                                                                                                                                                                                                                                                                                                                                                                                                                                                                                                                                                                                                                                                                                                                                                                                                                                                                                                                                                                                                                                                                                                                                                                                                                                                           | -0.0007748   | 1.51360539  |            |             |   |            |            |            |   |            |             |            |   |            |             |            |   |            |             |            |   |            |             |             |   |            |              |            |   |            |            |            |   |            |            |            |   |            |            |            |   |            |            |            |   |            |            |            |   |            |            |            |                                                                                                                                                                                                                                                                                                                                                                                                                                                                                                                                                                                                                                                                                                                        |           |            |            |        |            |            |            |        |            |            |            |        |            |            |            |                                                                                                                                                                                                                                                                                                                                                                                                                                                                                                                                                                                                                                                                                                                                                                                                                                                                                                                                                                               |            |            |           |         |            |            |            |                                                                                                                                                                                                                                                                                                                                                                                                                                                                                                                                                                                                                                                                                                                                                                                                                                                                                                                                                |         |         |         |         |         |         |         |         |         |         |         |                   |         |         |         |         |         |         |         |         |         |         |         |         |         |         |         |         |         |         |         |         |         |         |         |         |         |         |          |         |   |        |        |   |          |  |
| H                                                                                                                                                 | 1.02407629                                                                                                                                                                                                                                                                                                                                                                                                                                                                                                                                                                                                                                                                                                                                                                                                                                                                                                                                                                                                                                                                                                                                                                                                                                                                                                                                                                                                                                                                                                                                                           | -0.0013279   | 1.88712538  |            |             |   |            |            |            |   |            |             |            |   |            |             |            |   |            |             |            |   |            |             |             |   |            |              |            |   |            |            |            |   |            |            |            |   |            |            |            |   |            |            |            |   |            |            |            |   |            |            |            |                                                                                                                                                                                                                                                                                                                                                                                                                                                                                                                                                                                                                                                                                                                        |           |            |            |        |            |            |            |        |            |            |            |        |            |            |            |                                                                                                                                                                                                                                                                                                                                                                                                                                                                                                                                                                                                                                                                                                                                                                                                                                                                                                                                                                               |            |            |           |         |            |            |            |                                                                                                                                                                                                                                                                                                                                                                                                                                                                                                                                                                                                                                                                                                                                                                                                                                                                                                                                                |         |         |         |         |         |         |         |         |         |         |         |                   |         |         |         |         |         |         |         |         |         |         |         |         |         |         |         |         |         |         |         |         |         |         |         |         |         |         |          |         |   |        |        |   |          |  |
| C                                                                                                                                                 | -0.7974287                                                                                                                                                                                                                                                                                                                                                                                                                                                                                                                                                                                                                                                                                                                                                                                                                                                                                                                                                                                                                                                                                                                                                                                                                                                                                                                                                                                                                                                                                                                                                           | 1.15357383   | 2.13818207  |            |             |   |            |            |            |   |            |             |            |   |            |             |            |   |            |             |            |   |            |             |             |   |            |              |            |   |            |            |            |   |            |            |            |   |            |            |            |   |            |            |            |   |            |            |            |   |            |            |            |                                                                                                                                                                                                                                                                                                                                                                                                                                                                                                                                                                                                                                                                                                                        |           |            |            |        |            |            |            |        |            |            |            |        |            |            |            |                                                                                                                                                                                                                                                                                                                                                                                                                                                                                                                                                                                                                                                                                                                                                                                                                                                                                                                                                                               |            |            |           |         |            |            |            |                                                                                                                                                                                                                                                                                                                                                                                                                                                                                                                                                                                                                                                                                                                                                                                                                                                                                                                                                |         |         |         |         |         |         |         |         |         |         |         |                   |         |         |         |         |         |         |         |         |         |         |         |         |         |         |         |         |         |         |         |         |         |         |         |         |         |         |          |         |   |        |        |   |          |  |
| C                                                                                                                                                 | -1.4798701                                                                                                                                                                                                                                                                                                                                                                                                                                                                                                                                                                                                                                                                                                                                                                                                                                                                                                                                                                                                                                                                                                                                                                                                                                                                                                                                                                                                                                                                                                                                                           | 0.48981129   | 3.33384933  |            |             |   |            |            |            |   |            |             |            |   |            |             |            |   |            |             |            |   |            |             |             |   |            |              |            |   |            |            |            |   |            |            |            |   |            |            |            |   |            |            |            |   |            |            |            |   |            |            |            |                                                                                                                                                                                                                                                                                                                                                                                                                                                                                                                                                                                                                                                                                                                        |           |            |            |        |            |            |            |        |            |            |            |        |            |            |            |                                                                                                                                                                                                                                                                                                                                                                                                                                                                                                                                                                                                                                                                                                                                                                                                                                                                                                                                                                               |            |            |           |         |            |            |            |                                                                                                                                                                                                                                                                                                                                                                                                                                                                                                                                                                                                                                                                                                                                                                                                                                                                                                                                                |         |         |         |         |         |         |         |         |         |         |         |                   |         |         |         |         |         |         |         |         |         |         |         |         |         |         |         |         |         |         |         |         |         |         |         |         |         |         |          |         |   |        |        |   |          |  |
| C                                                                                                                                                 | -1.7430339                                                                                                                                                                                                                                                                                                                                                                                                                                                                                                                                                                                                                                                                                                                                                                                                                                                                                                                                                                                                                                                                                                                                                                                                                                                                                                                                                                                                                                                                                                                                                           | -0.8953466   | 2.77402096  |            |             |   |            |            |            |   |            |             |            |   |            |             |            |   |            |             |            |   |            |             |             |   |            |              |            |   |            |            |            |   |            |            |            |   |            |            |            |   |            |            |            |   |            |            |            |   |            |            |            |                                                                                                                                                                                                                                                                                                                                                                                                                                                                                                                                                                                                                                                                                                                        |           |            |            |        |            |            |            |        |            |            |            |        |            |            |            |                                                                                                                                                                                                                                                                                                                                                                                                                                                                                                                                                                                                                                                                                                                                                                                                                                                                                                                                                                               |            |            |           |         |            |            |            |                                                                                                                                                                                                                                                                                                                                                                                                                                                                                                                                                                                                                                                                                                                                                                                                                                                                                                                                                |         |         |         |         |         |         |         |         |         |         |         |                   |         |         |         |         |         |         |         |         |         |         |         |         |         |         |         |         |         |         |         |         |         |         |         |         |         |         |          |         |   |        |        |   |          |  |
| O                                                                                                                                                 | -2.9021967                                                                                                                                                                                                                                                                                                                                                                                                                                                                                                                                                                                                                                                                                                                                                                                                                                                                                                                                                                                                                                                                                                                                                                                                                                                                                                                                                                                                                                                                                                                                                           | -0.8189038   | 1.97650438  |            |             |   |            |            |            |   |            |             |            |   |            |             |            |   |            |             |            |   |            |             |             |   |            |              |            |   |            |            |            |   |            |            |            |   |            |            |            |   |            |            |            |   |            |            |            |   |            |            |            |                                                                                                                                                                                                                                                                                                                                                                                                                                                                                                                                                                                                                                                                                                                        |           |            |            |        |            |            |            |        |            |            |            |        |            |            |            |                                                                                                                                                                                                                                                                                                                                                                                                                                                                                                                                                                                                                                                                                                                                                                                                                                                                                                                                                                               |            |            |           |         |            |            |            |                                                                                                                                                                                                                                                                                                                                                                                                                                                                                                                                                                                                                                                                                                                                                                                                                                                                                                                                                |         |         |         |         |         |         |         |         |         |         |         |                   |         |         |         |         |         |         |         |         |         |         |         |         |         |         |         |         |         |         |         |         |         |         |         |         |         |         |          |         |   |        |        |   |          |  |
| O                                                                                                                                                 | -0.6144895                                                                                                                                                                                                                                                                                                                                                                                                                                                                                                                                                                                                                                                                                                                                                                                                                                                                                                                                                                                                                                                                                                                                                                                                                                                                                                                                                                                                                                                                                                                                                           | -1.2076519   | 2.00475315  |            |             |   |            |            |            |   |            |             |            |   |            |             |            |   |            |             |            |   |            |             |             |   |            |              |            |   |            |            |            |   |            |            |            |   |            |            |            |   |            |            |            |   |            |            |            |   |            |            |            |                                                                                                                                                                                                                                                                                                                                                                                                                                                                                                                                                                                                                                                                                                                        |           |            |            |        |            |            |            |        |            |            |            |        |            |            |            |                                                                                                                                                                                                                                                                                                                                                                                                                                                                                                                                                                                                                                                                                                                                                                                                                                                                                                                                                                               |            |            |           |         |            |            |            |                                                                                                                                                                                                                                                                                                                                                                                                                                                                                                                                                                                                                                                                                                                                                                                                                                                                                                                                                |         |         |         |         |         |         |         |         |         |         |         |                   |         |         |         |         |         |         |         |         |         |         |         |         |         |         |         |         |         |         |         |         |         |         |         |         |         |         |          |         |   |        |        |   |          |  |
| H                                                                                                                                                 | 0.53533923                                                                                                                                                                                                                                                                                                                                                                                                                                                                                                                                                                                                                                                                                                                                                                                                                                                                                                                                                                                                                                                                                                                                                                                                                                                                                                                                                                                                                                                                                                                                                           | -0.8685227   | -0.3838225  |            |             |   |            |            |            |   |            |             |            |   |            |             |            |   |            |             |            |   |            |             |             |   |            |              |            |   |            |            |            |   |            |            |            |   |            |            |            |   |            |            |            |   |            |            |            |   |            |            |            |                                                                                                                                                                                                                                                                                                                                                                                                                                                                                                                                                                                                                                                                                                                        |           |            |            |        |            |            |            |        |            |            |            |        |            |            |            |                                                                                                                                                                                                                                                                                                                                                                                                                                                                                                                                                                                                                                                                                                                                                                                                                                                                                                                                                                               |            |            |           |         |            |            |            |                                                                                                                                                                                                                                                                                                                                                                                                                                                                                                                                                                                                                                                                                                                                                                                                                                                                                                                                                |         |         |         |         |         |         |         |         |         |         |         |                   |         |         |         |         |         |         |         |         |         |         |         |         |         |         |         |         |         |         |         |         |         |         |         |         |         |         |          |         |   |        |        |   |          |  |
| H                                                                                                                                                 | 0.48266026                                                                                                                                                                                                                                                                                                                                                                                                                                                                                                                                                                                                                                                                                                                                                                                                                                                                                                                                                                                                                                                                                                                                                                                                                                                                                                                                                                                                                                                                                                                                                           | 0.90063253   | -0.3795674  |            |             |   |            |            |            |   |            |             |            |   |            |             |            |   |            |             |            |   |            |             |             |   |            |              |            |   |            |            |            |   |            |            |            |   |            |            |            |   |            |            |            |   |            |            |            |   |            |            |            |                                                                                                                                                                                                                                                                                                                                                                                                                                                                                                                                                                                                                                                                                                                        |           |            |            |        |            |            |            |        |            |            |            |        |            |            |            |                                                                                                                                                                                                                                                                                                                                                                                                                                                                                                                                                                                                                                                                                                                                                                                                                                                                                                                                                                               |            |            |           |         |            |            |            |                                                                                                                                                                                                                                                                                                                                                                                                                                                                                                                                                                                                                                                                                                                                                                                                                                                                                                                                                |         |         |         |         |         |         |         |         |         |         |         |                   |         |         |         |         |         |         |         |         |         |         |         |         |         |         |         |         |         |         |         |         |         |         |         |         |         |         |          |         |   |        |        |   |          |  |
| H                                                                                                                                                 | -1.0260335                                                                                                                                                                                                                                                                                                                                                                                                                                                                                                                                                                                                                                                                                                                                                                                                                                                                                                                                                                                                                                                                                                                                                                                                                                                                                                                                                                                                                                                                                                                                                           | -0.0307837   | -0.3671379  |            |             |   |            |            |            |   |            |             |            |   |            |             |            |   |            |             |            |   |            |             |             |   |            |              |            |   |            |            |            |   |            |            |            |   |            |            |            |   |            |            |            |   |            |            |            |   |            |            |            |                                                                                                                                                                                                                                                                                                                                                                                                                                                                                                                                                                                                                                                                                                                        |           |            |            |        |            |            |            |        |            |            |            |        |            |            |            |                                                                                                                                                                                                                                                                                                                                                                                                                                                                                                                                                                                                                                                                                                                                                                                                                                                                                                                                                                               |            |            |           |         |            |            |            |                                                                                                                                                                                                                                                                                                                                                                                                                                                                                                                                                                                                                                                                                                                                                                                                                                                                                                                                                |         |         |         |         |         |         |         |         |         |         |         |                   |         |         |         |         |         |         |         |         |         |         |         |         |         |         |         |         |         |         |         |         |         |         |         |         |         |         |          |         |   |        |        |   |          |  |
| 3776.00                                                                                                                                           |                                                                                                                                                                                                                                                                                                                                                                                                                                                                                                                                                                                                                                                                                                                                                                                                                                                                                                                                                                                                                                                                                                                                                                                                                                                                                                                                                                                                                                                                                                                                                                      |              |             |            |             |   |            |            |            |   |            |             |            |   |            |             |            |   |            |             |            |   |            |             |             |   |            |              |            |   |            |            |            |   |            |            |            |   |            |            |            |   |            |            |            |   |            |            |            |   |            |            |            |                                                                                                                                                                                                                                                                                                                                                                                                                                                                                                                                                                                                                                                                                                                        |           |            |            |        |            |            |            |        |            |            |            |        |            |            |            |                                                                                                                                                                                                                                                                                                                                                                                                                                                                                                                                                                                                                                                                                                                                                                                                                                                                                                                                                                               |            |            |           |         |            |            |            |                                                                                                                                                                                                                                                                                                                                                                                                                                                                                                                                                                                                                                                                                                                                                                                                                                                                                                                                                |         |         |         |         |         |         |         |         |         |         |         |                   |         |         |         |         |         |         |         |         |         |         |         |         |         |         |         |         |         |         |         |         |         |         |         |         |         |         |          |         |   |        |        |   |          |  |
| 54.27                                                                                                                                             | 187.04                                                                                                                                                                                                                                                                                                                                                                                                                                                                                                                                                                                                                                                                                                                                                                                                                                                                                                                                                                                                                                                                                                                                                                                                                                                                                                                                                                                                                                                                                                                                                               | 339.41       |             |            |             |   |            |            |            |   |            |             |            |   |            |             |            |   |            |             |            |   |            |             |             |   |            |              |            |   |            |            |            |   |            |            |            |   |            |            |            |   |            |            |            |   |            |            |            |   |            |            |            |                                                                                                                                                                                                                                                                                                                                                                                                                                                                                                                                                                                                                                                                                                                        |           |            |            |        |            |            |            |        |            |            |            |        |            |            |            |                                                                                                                                                                                                                                                                                                                                                                                                                                                                                                                                                                                                                                                                                                                                                                                                                                                                                                                                                                               |            |            |           |         |            |            |            |                                                                                                                                                                                                                                                                                                                                                                                                                                                                                                                                                                                                                                                                                                                                                                                                                                                                                                                                                |         |         |         |         |         |         |         |         |         |         |         |                   |         |         |         |         |         |         |         |         |         |         |         |         |         |         |         |         |         |         |         |         |         |         |         |         |         |         |          |         |   |        |        |   |          |  |
| 417.03                                                                                                                                            | 458.27                                                                                                                                                                                                                                                                                                                                                                                                                                                                                                                                                                                                                                                                                                                                                                                                                                                                                                                                                                                                                                                                                                                                                                                                                                                                                                                                                                                                                                                                                                                                                               | 516.60       |             |            |             |   |            |            |            |   |            |             |            |   |            |             |            |   |            |             |            |   |            |             |             |   |            |              |            |   |            |            |            |   |            |            |            |   |            |            |            |   |            |            |            |   |            |            |            |   |            |            |            |                                                                                                                                                                                                                                                                                                                                                                                                                                                                                                                                                                                                                                                                                                                        |           |            |            |        |            |            |            |        |            |            |            |        |            |            |            |                                                                                                                                                                                                                                                                                                                                                                                                                                                                                                                                                                                                                                                                                                                                                                                                                                                                                                                                                                               |            |            |           |         |            |            |            |                                                                                                                                                                                                                                                                                                                                                                                                                                                                                                                                                                                                                                                                                                                                                                                                                                                                                                                                                |         |         |         |         |         |         |         |         |         |         |         |                   |         |         |         |         |         |         |         |         |         |         |         |         |         |         |         |         |         |         |         |         |         |         |         |         |         |         |          |         |   |        |        |   |          |  |
| 615.00                                                                                                                                            | 785.05                                                                                                                                                                                                                                                                                                                                                                                                                                                                                                                                                                                                                                                                                                                                                                                                                                                                                                                                                                                                                                                                                                                                                                                                                                                                                                                                                                                                                                                                                                                                                               | 829.06       |             |            |             |   |            |            |            |   |            |             |            |   |            |             |            |   |            |             |            |   |            |             |             |   |            |              |            |   |            |            |            |   |            |            |            |   |            |            |            |   |            |            |            |   |            |            |            |   |            |            |            |                                                                                                                                                                                                                                                                                                                                                                                                                                                                                                                                                                                                                                                                                                                        |           |            |            |        |            |            |            |        |            |            |            |        |            |            |            |                                                                                                                                                                                                                                                                                                                                                                                                                                                                                                                                                                                                                                                                                                                                                                                                                                                                                                                                                                               |            |            |           |         |            |            |            |                                                                                                                                                                                                                                                                                                                                                                                                                                                                                                                                                                                                                                                                                                                                                                                                                                                                                                                                                |         |         |         |         |         |         |         |         |         |         |         |                   |         |         |         |         |         |         |         |         |         |         |         |         |         |         |         |         |         |         |         |         |         |         |         |         |         |         |          |         |   |        |        |   |          |  |
| 876.81                                                                                                                                            | 919.85                                                                                                                                                                                                                                                                                                                                                                                                                                                                                                                                                                                                                                                                                                                                                                                                                                                                                                                                                                                                                                                                                                                                                                                                                                                                                                                                                                                                                                                                                                                                                               | 926.47       |             |            |             |   |            |            |            |   |            |             |            |   |            |             |            |   |            |             |            |   |            |             |             |   |            |              |            |   |            |            |            |   |            |            |            |   |            |            |            |   |            |            |            |   |            |            |            |   |            |            |            |                                                                                                                                                                                                                                                                                                                                                                                                                                                                                                                                                                                                                                                                                                                        |           |            |            |        |            |            |            |        |            |            |            |        |            |            |            |                                                                                                                                                                                                                                                                                                                                                                                                                                                                                                                                                                                                                                                                                                                                                                                                                                                                                                                                                                               |            |            |           |         |            |            |            |                                                                                                                                                                                                                                                                                                                                                                                                                                                                                                                                                                                                                                                                                                                                                                                                                                                                                                                                                |         |         |         |         |         |         |         |         |         |         |         |                   |         |         |         |         |         |         |         |         |         |         |         |         |         |         |         |         |         |         |         |         |         |         |         |         |         |         |          |         |   |        |        |   |          |  |
| 976.14                                                                                                                                            | 1011.56                                                                                                                                                                                                                                                                                                                                                                                                                                                                                                                                                                                                                                                                                                                                                                                                                                                                                                                                                                                                                                                                                                                                                                                                                                                                                                                                                                                                                                                                                                                                                              | 1033.32      |             |            |             |   |            |            |            |   |            |             |            |   |            |             |            |   |            |             |            |   |            |             |             |   |            |              |            |   |            |            |            |   |            |            |            |   |            |            |            |   |            |            |            |   |            |            |            |   |            |            |            |                                                                                                                                                                                                                                                                                                                                                                                                                                                                                                                                                                                                                                                                                                                        |           |            |            |        |            |            |            |        |            |            |            |        |            |            |            |                                                                                                                                                                                                                                                                                                                                                                                                                                                                                                                                                                                                                                                                                                                                                                                                                                                                                                                                                                               |            |            |           |         |            |            |            |                                                                                                                                                                                                                                                                                                                                                                                                                                                                                                                                                                                                                                                                                                                                                                                                                                                                                                                                                |         |         |         |         |         |         |         |         |         |         |         |                   |         |         |         |         |         |         |         |         |         |         |         |         |         |         |         |         |         |         |         |         |         |         |         |         |         |         |          |         |   |        |        |   |          |  |
| 1057.29                                                                                                                                           | 1141.55                                                                                                                                                                                                                                                                                                                                                                                                                                                                                                                                                                                                                                                                                                                                                                                                                                                                                                                                                                                                                                                                                                                                                                                                                                                                                                                                                                                                                                                                                                                                                              | 1147.09      |             |            |             |   |            |            |            |   |            |             |            |   |            |             |            |   |            |             |            |   |            |             |             |   |            |              |            |   |            |            |            |   |            |            |            |   |            |            |            |   |            |            |            |   |            |            |            |   |            |            |            |                                                                                                                                                                                                                                                                                                                                                                                                                                                                                                                                                                                                                                                                                                                        |           |            |            |        |            |            |            |        |            |            |            |        |            |            |            |                                                                                                                                                                                                                                                                                                                                                                                                                                                                                                                                                                                                                                                                                                                                                                                                                                                                                                                                                                               |            |            |           |         |            |            |            |                                                                                                                                                                                                                                                                                                                                                                                                                                                                                                                                                                                                                                                                                                                                                                                                                                                                                                                                                |         |         |         |         |         |         |         |         |         |         |         |                   |         |         |         |         |         |         |         |         |         |         |         |         |         |         |         |         |         |         |         |         |         |         |         |         |         |         |          |         |   |        |        |   |          |  |
| 1163.60                                                                                                                                           | 1208.63                                                                                                                                                                                                                                                                                                                                                                                                                                                                                                                                                                                                                                                                                                                                                                                                                                                                                                                                                                                                                                                                                                                                                                                                                                                                                                                                                                                                                                                                                                                                                              | 1235.80      |             |            |             |   |            |            |            |   |            |             |            |   |            |             |            |   |            |             |            |   |            |             |             |   |            |              |            |   |            |            |            |   |            |            |            |   |            |            |            |   |            |            |            |   |            |            |            |   |            |            |            |                                                                                                                                                                                                                                                                                                                                                                                                                                                                                                                                                                                                                                                                                                                        |           |            |            |        |            |            |            |        |            |            |            |        |            |            |            |                                                                                                                                                                                                                                                                                                                                                                                                                                                                                                                                                                                                                                                                                                                                                                                                                                                                                                                                                                               |            |            |           |         |            |            |            |                                                                                                                                                                                                                                                                                                                                                                                                                                                                                                                                                                                                                                                                                                                                                                                                                                                                                                                                                |         |         |         |         |         |         |         |         |         |         |         |                   |         |         |         |         |         |         |         |         |         |         |         |         |         |         |         |         |         |         |         |         |         |         |         |         |         |         |          |         |   |        |        |   |          |  |
| 1257.52                                                                                                                                           | 1314.95                                                                                                                                                                                                                                                                                                                                                                                                                                                                                                                                                                                                                                                                                                                                                                                                                                                                                                                                                                                                                                                                                                                                                                                                                                                                                                                                                                                                                                                                                                                                                              | 1345.70      |             |            |             |   |            |            |            |   |            |             |            |   |            |             |            |   |            |             |            |   |            |             |             |   |            |              |            |   |            |            |            |   |            |            |            |   |            |            |            |   |            |            |            |   |            |            |            |   |            |            |            |                                                                                                                                                                                                                                                                                                                                                                                                                                                                                                                                                                                                                                                                                                                        |           |            |            |        |            |            |            |        |            |            |            |        |            |            |            |                                                                                                                                                                                                                                                                                                                                                                                                                                                                                                                                                                                                                                                                                                                                                                                                                                                                                                                                                                               |            |            |           |         |            |            |            |                                                                                                                                                                                                                                                                                                                                                                                                                                                                                                                                                                                                                                                                                                                                                                                                                                                                                                                                                |         |         |         |         |         |         |         |         |         |         |         |                   |         |         |         |         |         |         |         |         |         |         |         |         |         |         |         |         |         |         |         |         |         |         |         |         |         |         |          |         |   |        |        |   |          |  |
| 1366.88                                                                                                                                           | 1391.19                                                                                                                                                                                                                                                                                                                                                                                                                                                                                                                                                                                                                                                                                                                                                                                                                                                                                                                                                                                                                                                                                                                                                                                                                                                                                                                                                                                                                                                                                                                                                              | 1399.58      |             |            |             |   |            |            |            |   |            |             |            |   |            |             |            |   |            |             |            |   |            |             |             |   |            |              |            |   |            |            |            |   |            |            |            |   |            |            |            |   |            |            |            |   |            |            |            |   |            |            |            |                                                                                                                                                                                                                                                                                                                                                                                                                                                                                                                                                                                                                                                                                                                        |           |            |            |        |            |            |            |        |            |            |            |        |            |            |            |                                                                                                                                                                                                                                                                                                                                                                                                                                                                                                                                                                                                                                                                                                                                                                                                                                                                                                                                                                               |            |            |           |         |            |            |            |                                                                                                                                                                                                                                                                                                                                                                                                                                                                                                                                                                                                                                                                                                                                                                                                                                                                                                                                                |         |         |         |         |         |         |         |         |         |         |         |                   |         |         |         |         |         |         |         |         |         |         |         |         |         |         |         |         |         |         |         |         |         |         |         |         |         |         |          |         |   |        |        |   |          |  |
| 1414.97                                                                                                                                           | 1444.00                                                                                                                                                                                                                                                                                                                                                                                                                                                                                                                                                                                                                                                                                                                                                                                                                                                                                                                                                                                                                                                                                                                                                                                                                                                                                                                                                                                                                                                                                                                                                              | 1482.11      |             |            |             |   |            |            |            |   |            |             |            |   |            |             |            |   |            |             |            |   |            |             |             |   |            |              |            |   |            |            |            |   |            |            |            |   |            |            |            |   |            |            |            |   |            |            |            |   |            |            |            |                                                                                                                                                                                                                                                                                                                                                                                                                                                                                                                                                                                                                                                                                                                        |           |            |            |        |            |            |            |        |            |            |            |        |            |            |            |                                                                                                                                                                                                                                                                                                                                                                                                                                                                                                                                                                                                                                                                                                                                                                                                                                                                                                                                                                               |            |            |           |         |            |            |            |                                                                                                                                                                                                                                                                                                                                                                                                                                                                                                                                                                                                                                                                                                                                                                                                                                                                                                                                                |         |         |         |         |         |         |         |         |         |         |         |                   |         |         |         |         |         |         |         |         |         |         |         |         |         |         |         |         |         |         |         |         |         |         |         |         |         |         |          |         |   |        |        |   |          |  |
| 1488.82                                                                                                                                           | 1499.57                                                                                                                                                                                                                                                                                                                                                                                                                                                                                                                                                                                                                                                                                                                                                                                                                                                                                                                                                                                                                                                                                                                                                                                                                                                                                                                                                                                                                                                                                                                                                              | 1505.50      |             |            |             |   |            |            |            |   |            |             |            |   |            |             |            |   |            |             |            |   |            |             |             |   |            |              |            |   |            |            |            |   |            |            |            |   |            |            |            |   |            |            |            |   |            |            |            |   |            |            |            |                                                                                                                                                                                                                                                                                                                                                                                                                                                                                                                                                                                                                                                                                                                        |           |            |            |        |            |            |            |        |            |            |            |        |            |            |            |                                                                                                                                                                                                                                                                                                                                                                                                                                                                                                                                                                                                                                                                                                                                                                                                                                                                                                                                                                               |            |            |           |         |            |            |            |                                                                                                                                                                                                                                                                                                                                                                                                                                                                                                                                                                                                                                                                                                                                                                                                                                                                                                                                                |         |         |         |         |         |         |         |         |         |         |         |                   |         |         |         |         |         |         |         |         |         |         |         |         |         |         |         |         |         |         |         |         |         |         |         |         |         |         |          |         |   |        |        |   |          |  |

|                                                                                                          |   |            |            |             |          |            |           |
|----------------------------------------------------------------------------------------------------------|---|------------|------------|-------------|----------|------------|-----------|
|                                                                                                          | H | -0.1566794 | 1.98773494 | 2.4146197   | 3052.74  | 3061.56    | 3081.22   |
|                                                                                                          | H | -1.5487815 | 1.51119904 | 1.43451457  | 3093.09  | 3098.50    | 3136.50   |
|                                                                                                          | H | -0.7995758 | 0.41132959 | 4.18164594  | 3144.50  | 3148.80    | 3163.01   |
|                                                                                                          | H | -2.3958333 | 0.98122292 | 3.65018686  | 3873.78  |            |           |
|                                                                                                          | H | -1.8470984 | -1.6807751 | 3.52483674  | ! 253.91 | 311.31     | !Torsions |
|                                                                                                          | H | -2.9669824 | -1.6392377 | 1.47919626  |          |            |           |
|                                                                                                          | O | 0.00000000 | 0.00000000 | -0.00571069 | 3776.00  |            |           |
|                                                                                                          | H | 0.00000000 | 0.00000000 | 0.96571069  |          |            |           |
|                                                                                                          | O | 0.02014808 | 0.2180686  | 0.01052076  | 253.78   | 280.32     | 354.70    |
|                                                                                                          | C | 0.01382496 | 0.03673468 | 1.19650654  | 537.29   | 631.61     | 662.26    |
|                                                                                                          | C | 1.21984147 | 0.01800089 | 2.09735199  | 745.91   | 829.53     | 854.70    |
|                                                                                                          | C | 2.53221328 | 0.01034601 | 1.32938042  | 915.33   | 956.40     | 1041.65   |
|                                                                                                          | C | 2.80354534 | -1.3147695 | 0.62577134  | 1081.65  | 1130.34    | 1130.60   |
|                                                                                                          | C | 4.11601917 | -1.2945265 | -0.1462067  | 1195.93  | 1241.89    | 1277.61   |
|                                                                                                          | H | 1.97899527 | -1.532213  | -0.0550909  | 1318.51  | 1331.60    | 1338.98   |
|                                                                                                          | O | -1.1272159 | -0.1548257 | 1.88744595  | 1408.59  | 1414.89    | 1433.29   |
|                                                                                                          | H | 4.30576562 | -2.2475127 | -0.6384612  | 1463.22  | 1484.87    | 1497.60   |
|                                                                                                          | H | 4.95634995 | -1.0867968 | 0.51820866  | 1504.79  | 1511.48    | 1871.61   |
|                                                                                                          | H | 4.09919428 | -0.5189778 | -0.9128656  | 3050.08  | 3058.08    | 3064.51   |
|                                                                                                          | H | 3.3484219  | 0.22570063 | 2.02221554  | 3072.27  | 3092.86    | 3106.64   |
|                                                                                                          | H | 2.51656091 | 0.81442672 | 0.5912845   | 3114.98  | 3129.00    | 3135.52   |
|                                                                                                          | H | 1.1319498  | -0.8468128 | 2.75807537  | 3816.27  |            |           |
|                                                                                                          | H | 1.13359719 | 0.89712251 | 2.74037013  | ! 50.34  | 81.29      | 117.85    |
|                                                                                                          | H | 2.82380059 | -2.1167193 | 1.36896301  | 243.91   | 522.79!    | Torsions  |
|                                                                                                          | H | -1.8534149 | -0.1049200 | 1.2512832   |          |            |           |
| OH + Pentanoic Acid<br>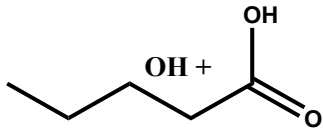 | C | 8.8485E-05 | 0.00012417 | -4.416E-05  | 2089.05i | 123.64     | 180.62    |
|                                                                                                          | C | 6.0188E-05 | -9.89E-05  | 1.53057582  | 220.11   | 318.37     | 336.19    |
|                                                                                                          | O | 1.27642122 | 0.000171   | 2.06800445  | 496.79   | 566.42     | 624.17    |
|                                                                                                          | O | -0.7262066 | 1.17616577 | 1.83616576  | 735.48   | 801.75     | 828.72    |
|                                                                                                          | O | -0.1310915 | 2.13158639 | 0.999846    | 910.04   | 922.31     | 949.47    |
|                                                                                                          | H | 0.06859892 | 1.31699712 | 0.0575313   | 990.24   | 1030.98    | 1061.22   |
|                                                                                                          | H | 0.90053782 | -0.3995113 | -0.4605117  | 1083.68  | 1117.41    | 1133.80   |
|                                                                                                          | H | -0.5462871 | -0.8298068 | 1.98054492  | 1165.82  | 1181.43    | 1243.93   |
|                                                                                                          | H | 1.70364411 | 0.82321109 | 1.80266165  | 1260.66  | 1301.78    | 1323.61   |
|                                                                                                          | C | -1.2896888 | -0.3393215 | -0.6832248  | 1331.52  | 1367.91    | 1408.25   |
|                                                                                                          | C | -1.3070559 | 0.03527961 | -2.1618682  | 1417.53  | 1437.53    | 1471.46   |
|                                                                                                          | H | -2.1143508 | 0.15221944 | -0.1604269  | 1495.52  | 1504.90    | 1510.93   |
|                                                                                                          | H | -1.4597372 | -1.4200354 | -0.5830179  | 1745.19  | 3003.27    | 3054.97   |
|                                                                                                          | H | -1.1514065 | 1.11252534 | -2.2532931  | 3061.65  | 3076.14    | 3095.42   |
|                                                                                                          | H | -0.465117  | -0.4455968 | -2.6656663  | 3113.71  | 3129.78    | 3139.79   |
|                                                                                                          | C | -2.6121246 | -0.3593492 | -2.8394234  | 3146.25  | 3835.93    |           |
|                                                                                                          | H | -2.7711199 | -1.4368586 | -2.7795563  | ! 63.52  | 77.06      | 247.99    |
|                                                                                                          | H | -3.4606302 | 0.12887788 | -2.3587993  | 376.47   | ! Torsions |           |
|                                                                                                          | H | -2.6152042 | -0.0780794 | -3.8914231  |          |            |           |
| n-Pentanol ROO1=<br>QOOH-2                                                                               | C | 2.5421E-05 | 0.00012482 | 2.155E-05   | 1833.19i | 100.55     | 128.59    |
|                                                                                                          | C | 2.5934E-05 | 0.00010875 | 1.50599253  | 280.16   | 302.64     | 353.27    |
|                                                                                                          | C | 1.33575855 | 2.1092E-05 | 2.20001529  | 418.18   | 487.97     | 536.12    |
|                                                                                                          | C | 1.87050911 | -1.4250411 | 2.36143567  | 567.78   | 652.47     | 751.55    |
|                                                                                                          | O | 2.97964642 | -1.3963491 | 3.18132211  | 843.39   | 855.98     | 912.17    |
|                                                                                                          | H | 3.33066489 | -2.2882614 | 3.26165548  | 984.77   | 1034.87    | 1052.51   |
|                                                                                                          | H | -0.404394  | -1.2346438 | 1.82380774  | 1090.82  | 1106.50    | 1131.78   |
|                                                                                                          | H | 2.07703379 | 0.57048297 | 1.63245342  | 1150.27  | 1200.17    | 1214.96   |
|                                                                                                          | H | 1.27371636 | 0.41759138 | 3.20370972  | 1236.92  | 1263.84    | 1290.52   |
|                                                                                                          | H | 0.36690614 | 0.97176605 | -0.351255   | 1314.83  | 1333.75    | 1379.70   |
| n-Pentanol ROO1=<br>QOOH-3                                                                               |   |            |            |             |          |            |           |

|                                                      |            |            |            |            |           |         |         |
|------------------------------------------------------|------------|------------|------------|------------|-----------|---------|---------|
|                                                      | H          | 0.71678317 | -0.7426769 | -0.3603363 | 1403.98   | 1416.79 | 1450.82 |
|                                                      | H          | 2.06490038 | -1.8960581 | 1.39138876 | 1470.68   | 1478.20 | 1504.11 |
|                                                      | O          | 0.86805173 | -2.1968287 | 3.01258184 | 1507.41   | 1581.68 | 3022.54 |
|                                                      | O          | -0.1533574 | -2.3799666 | 2.0969362  | 3041.98   | 3053.34 | 3062.30 |
|                                                      | H          | -0.7592453 | 0.63697214 | 1.95531764 | 3071.72   | 3125.96 | 3130.86 |
|                                                      | C          | -1.3774249 | -0.2779947 | -0.5880746 | 3139.15   | 3142.55 | 3868.38 |
|                                                      | H          | -2.102284  | 0.45839206 | -0.2390207 | ! 69.55   | 249.47  | 334.14  |
|                                                      | H          | -1.3594353 | -0.243726  | -1.6761788 | !Torsions |         |         |
|                                                      | H          | -1.7304996 | -1.2644728 | -0.2858555 |           |         |         |
| n-Pentanol ROO1=<br>QOOH-4                           | C          | 4.2261E-05 | -1.905E-05 | -4.127E-05 | 1862.03i  | 66.17   | 118.86  |
|                                                      | C          | 8.7379E-06 | -9.098E-06 | 1.51211111 | 234.54    | 262.67  | 321.86  |
|                                                      | C          | 1.41853513 | -5.728E-05 | 2.09173692 | 374.90    | 395.52  | 491.46  |
|                                                      | C          | 2.03305211 | 1.39825635 | 2.13311163 | 567.61    | 571.73  | 682.54  |
|                                                      | O          | 1.62267213 | 2.18042757 | 1.01802004 | 790.05    | 838.97  | 885.57  |
|                                                      | O          | 1.97409776 | 1.50681635 | -0.1400836 | 898.21    | 980.60  | 1021.69 |
|                                                      | H          | 1.0325814  | 0.76229656 | -0.281174  | 1054.02   | 1077.16 | 1105.82 |
|                                                      | H          | -0.5438988 | -0.8809314 | 1.86582538 | 1129.11   | 1145.72 | 1161.49 |
|                                                      | O          | 3.41399804 | 1.36943648 | 2.25858411 | 1177.95   | 1221.19 | 1252.33 |
|                                                      | H          | 1.43225987 | -0.3896466 | 3.10868801 | 1315.23   | 1329.39 | 1366.45 |
|                                                      | H          | 2.06033949 | -0.6517457 | 1.49440974 | 1391.90   | 1399.58 | 1409.92 |
|                                                      | H          | 0.33090093 | -0.9475672 | -0.4268865 | 1432.07   | 1477.00 | 1482.78 |
|                                                      | H          | 1.64796344 | 1.9698976  | 2.97798704 | 1489.41   | 1489.79 | 1503.20 |
|                                                      | H          | 3.76662198 | 0.95605926 | 1.46244929 | 3031.12   | 3044.07 | 3070.04 |
|                                                      | H          | -0.5465025 | 0.87244436 | 1.87773876 | 3087.05   | 3099.22 | 3107.89 |
|                                                      | C          | -1.1816447 | 0.62448246 | -0.684413  | 3109.65   | 3131.18 | 3146.87 |
| H                                                    | -1.0861228 | 0.59801629 | -1.7681928 | 3844.27    |           |         |         |
| H                                                    | -2.102408  | 0.09591324 | -0.4149424 | ! 197.63   | 342.75    |         |         |
|                                                      |            |            |            | !Torsions  |           |         |         |
| n-Pentanol ROO1=<br>QOOH-5                           | C          | -0.0004533 | -0.0002369 | 0.00019493 | 1901.04i  | 97.40   | 160.45  |
|                                                      | C          | 0.00040915 | 0.00013177 | 1.53217177 | 183.80    | 220.10  | 319.46  |
|                                                      | C          | 1.40694508 | 0.00035332 | 2.14666068 | 353.49    | 411.93  | 479.09  |
|                                                      | C          | 1.86380919 | 1.33839917 | 2.71329078 | 521.93    | 572.67  | 637.91  |
|                                                      | O          | 1.69367557 | 2.40971517 | 1.79651363 | 671.03    | 780.54  | 793.45  |
|                                                      | O          | 2.41480436 | 2.12711196 | 0.64746146 | 878.10    | 915.81  | 970.47  |
|                                                      | H          | -0.5379879 | -0.8849129 | 1.86984973 | 995.63    | 1044.86 | 1059.93 |
|                                                      | O          | 3.17070369 | 1.27866998 | 3.18069779 | 1098.32   | 1114.30 | 1137.29 |
|                                                      | H          | 1.46826254 | -0.7062671 | 2.97356522 | 1157.93   | 1186.80 | 1226.05 |
|                                                      | H          | 2.14311617 | -0.3246328 | 1.40741093 | 1262.48   | 1273.85 | 1325.61 |
|                                                      | H          | 0.62151891 | -0.8235698 | -0.3580492 | 1359.57   | 1379.11 | 1389.45 |
|                                                      | H          | -1.0174701 | -0.2147781 | -0.3503834 | 1405.87   | 1431.50 | 1454.40 |
|                                                      | H          | 1.23829396 | 1.64382019 | 3.55292847 | 1468.57   | 1478.45 | 1488.74 |
|                                                      | H          | 3.73945718 | 1.09193313 | 2.42561523 | 1495.51   | 3016.31 | 3058.76 |
|                                                      | H          | -0.5642946 | 0.86388465 | 1.8931926  | 3069.56   | 3082.32 | 3101.12 |
|                                                      | C          | 0.43770792 | 1.29083292 | -0.6285737 | 3106.16   | 3112.87 | 3127.32 |
| H                                                    | 1.58369268 | 1.68077868 | -0.066018  | 3187.96    | 3847.28   |         |         |
| H                                                    | 0.67370726 | 1.25379833 | -1.6883883 | ! 311.49   | !Torisons |         |         |
| H                                                    | -0.1523223 | 2.16240843 | -0.3509003 |            |           |         |         |
| n-Pentanol ROO1= HO <sub>2</sub><br>Pentanal complex | C          | 0          | 0          | 0          | 668.84i   | 104.81  | 171.76  |
|                                                      | C          | 0          | 0          | 1.52350303 | 275.70    | 312.95  | 403.38  |
|                                                      | C          | 1.40625508 | 0          | 2.10270102 | 574.52    | 657.60  | 720.85  |
|                                                      | C          | 1.44270643 | 0.03528892 | 3.60269179 | 734.99    | 783.20  | 804.18  |
|                                                      | O          | 0.55503711 | 0.6413259  | 4.27082707 | 903.09    | 927.01  | 941.93  |
|                                                      | O          | 0.87348572 | -1.747869  | 3.99197183 | 1053.06   | 1057.48 | 1062.27 |
|                                                      | O          | -0.1167296 | -1.5125966 | 4.75615309 | 1091.39   | 1146.01 | 1191.17 |
|                                                      | H          | 0.54819615 | -0.8734043 | -0.3625439 | 1246.30   | 1285.74 | 1317.08 |

|                                                  |            |            |            |            |           |           |         |
|--------------------------------------------------|------------|------------|------------|------------|-----------|-----------|---------|
|                                                  | H          | 1.97925371 | -0.8654456 | 1.76188058 | 1334.36   | 1374.88   | 1387.69 |
|                                                  | H          | 1.95520958 | 0.88597888 | 1.76338975 | 1388.53   | 1415.47   | 1418.75 |
|                                                  | H          | 2.43000651 | -0.1105875 | 4.05662885 | 1463.17   | 1492.19   | 1501.43 |
|                                                  | H          | -0.0597594 | -0.3570995 | 4.74177686 | 1504.61   | 1514.79   | 1675.88 |
|                                                  | H          | -0.5401999 | 0.87205121 | 1.89552337 | 1950.83   | 3036.37   | 3046.59 |
|                                                  | H          | -0.5400432 | -0.8782498 | 1.88772655 | 3050.20   | 3059.94   | 3063.13 |
|                                                  | H          | 0.54510051 | 0.87673139 | -0.3596369 | 3077.04   | 3090.41   | 3113.45 |
|                                                  | C          | -1.4095452 | -0.0015874 | -0.5766425 | 3128.63   | 3137.64   |         |
|                                                  | H          | -1.9640099 | 0.87737126 | -0.2453524 | ! 63.20   | 69.04     | 145.78  |
|                                                  | H          | -1.3972966 | -0.000182  | -1.6658233 | 246.81    | !Torsions |         |
|                                                  | H          | -1.9609971 | -0.8835436 | -0.2481134 |           |           |         |
| n-Pentanol ROO1= HO <sub>2</sub> + 1-Penten-1-ol | C          | 0          | 0          | 0          | 1087.80i  | 88.62     | 143.20  |
|                                                  | H          | 0          | 0          | 1.08942524 | 235.59    | 254.75    | 277.95  |
|                                                  | H          | 1.03795626 | 0          | -0.3356393 | 359.83    | 473.58    | 601.55  |
|                                                  | H          | -0.4558752 | -0.9329245 | -0.3351361 | 656.69    | 719.16    | 756.53  |
|                                                  | C          | -0.748102  | 1.20160852 | -0.5612819 | 858.89    | 879.84    | 924.52  |
|                                                  | H          | -1.7794232 | 1.20062512 | -0.1995349 | 984.26    | 1018.10   | 1067.55 |
|                                                  | H          | -0.2915225 | 2.12702709 | -0.2041818 | 1086.48   | 1129.53   | 1157.27 |
|                                                  | C          | -0.7546363 | 1.21457387 | -2.0888944 | 1245.32   | 1288.90   | 1294.97 |
|                                                  | H          | -1.1932368 | 0.28449737 | -2.4564085 | 1297.89   | 1322.57   | 1336.18 |
|                                                  | H          | 0.27434004 | 1.23838222 | -2.4533841 | 1389.59   | 1397.73   | 1413.25 |
|                                                  | C          | -1.5178899 | 2.38855297 | -2.6704342 | 1435.71   | 1487.81   | 1497.15 |
|                                                  | H          | -1.4274414 | 2.2704569  | -3.990239  | 1503.26   | 1511.66   | 1626.55 |
|                                                  | H          | -2.593107  | 2.39434125 | -2.518242  | 1653.58   | 3053.21   | 3058.63 |
|                                                  | C          | -0.9390347 | 3.65261946 | -2.6756706 | 3066.57   | 3086.08   | 3108.22 |
|                                                  | H          | -1.5356103 | 4.55234871 | -2.7484571 | 3128.10   | 3135.20   | 3157.63 |
|                                                  | O          | 0.33765227 | 3.79880741 | -2.2950497 | 3204.50   | 3869.92   |         |
|                                                  | H          | 0.66971916 | 4.66034992 | -2.5652512 | ! 66.75   | 97.96     | 239.16  |
| O                                                | -0.610808  | 3.80412871 | -4.7793246 | 420.41     | !Torsions |           |         |
| O                                                | -1.0396935 | 2.67687513 | -5.1589191 |            |           |           |         |
| QOOH-2 = OH + 3-propyloxiran-2-ol                | C          | 0.11379485 | 0.07602079 | -0.0063842 | 906.29i   | 135.24    | 146.16  |
|                                                  | C          | 0.04608932 | -0.0185864 | 1.51273894 | 175.72    | 216.96    | 296.09  |
|                                                  | C          | 1.43053841 | -0.0030253 | 2.16358438 | 306.73    | 395.08    | 441.11  |
|                                                  | C          | 2.15762549 | 1.27081981 | 1.97878144 | 575.12    | 669.32    | 710.27  |
|                                                  | H          | 1.62240642 | 2.20994906 | 2.00722747 | 780.97    | 851.06    | 901.06  |
|                                                  | C          | 3.59945885 | 1.32892165 | 1.69717482 | 934.20    | 1040.09   | 1072.26 |
|                                                  | O          | 4.31589792 | 0.21274789 | 2.0927225  | 1088.17   | 1105.80   | 1165.94 |
|                                                  | O          | 3.21756369 | 1.30753267 | 0.37203768 | 1213.62   | 1244.20   | 1267.46 |
|                                                  | O          | 4.71093013 | 1.27401642 | -0.4785249 | 1281.89   | 1328.82   | 1361.83 |
|                                                  | H          | 0.5880503  | 1.00498913 | -0.3220752 | 1376.50   | 1419.76   | 1432.69 |
|                                                  | H          | -0.8811469 | 0.03036522 | -0.4472502 | 1455.02   | 1486.60   | 1498.05 |
|                                                  | H          | 0.70503425 | -0.7448062 | -0.4148193 | 1502.05   | 1509.87   | 3009.60 |
|                                                  | H          | -0.5479003 | 0.80764749 | 1.9116057  | 3056.93   | 3063.72   | 3067.59 |
|                                                  | H          | -0.4647618 | -0.9367541 | 1.80549319 | 3096.77   | 3116.65   | 3132.80 |
|                                                  | H          | 1.32776012 | -0.1642116 | 3.24515601 | 3142.33   | 3214.76   | 3808.23 |
|                                                  | H          | 2.05106168 | -0.8199274 | 1.79429139 | 3856.03   |           |         |
|                                                  | H          | 4.10787558 | 2.26023933 | 1.96009686 | ! 49.12   | 74.11     | 243.76  |
| H                                                | 5.02685518 | 0.1315159  | 1.44313177 | 426.14     | 974.80    | !Torsions |         |
| H                                                | 4.37781473 | 0.71212644 | -1.1888082 |            |           |           |         |
| QOOH-2 = HO <sub>2</sub> + 1-Penten-1-ol         | O          | -0.0267702 | -0.0078786 | 0.01390689 | 654.52i   | 72.13     | 193.57  |
|                                                  | C          | -0.0089391 | -0.0136927 | 1.36556389 | 254.90    | 308.96    | 350.25  |
|                                                  | C          | 1.14544198 | 0.01903844 | 2.10641832 | 417.87    | 456.46    | 573.43  |
|                                                  | C          | 1.15390982 | 0.13974823 | 3.59238924 | 743.69    | 773.88    | 877.11  |
|                                                  | C          | 1.24050035 | -1.2128538 | 4.32325106 | 880.40    | 955.97    | 1001.26 |
|                                                  | C          | 2.39539893 | -2.0775911 | 3.83705537 | 1064.93   | 1070.35   | 1107.65 |

|                                        |            |            |            |            |          |         |           |
|----------------------------------------|------------|------------|------------|------------|----------|---------|-----------|
|                                        | H          | 2.07788216 | -0.2114935 | 1.60078604 | 1142.05  | 1163.33 | 1234.77   |
|                                        | O          | -0.4132305 | -1.8992246 | 1.72209613 | 1271.70  | 1286.03 | 1328.53   |
|                                        | O          | 0.15537475 | -2.5834106 | 0.67515829 | 1349.59  | 1371.83 | 1410.02   |
|                                        | H          | 2.22549997 | -2.3990405 | 2.80913347 | 1419.76  | 1427.61 | 1485.81   |
|                                        | H          | 2.49900465 | -2.9715138 | 4.45058561 | 1491.63  | 1502.32 | 1513.98   |
|                                        | H          | 3.34177907 | -1.5332053 | 3.87668468 | 1577.76  | 3046.57 | 3052.38   |
|                                        | H          | 0.30513824 | -1.7510307 | 4.17492083 | 3069.57  | 3094.77 | 3113.82   |
|                                        | H          | 1.34184474 | -1.0135798 | 5.39175499 | 3132.37  | 3138.63 | 3166.22   |
|                                        | H          | 0.25894789 | 0.67026268 | 3.9229441  | 3225.10  | 3781.09 | 3849.34   |
|                                        | H          | 2.01338301 | 0.74866806 | 3.88668055 | ! 43.49  | 117.99  | 156.44    |
|                                        | H          | -0.9502777 | 0.3140611  | 1.7831418  | 272.45   | 302.95  | 535.17 !  |
|                                        | H          | 0.83693475 | -0.2864984 | -0.3095862 | Torsions |         |           |
|                                        | H          | -0.4526998 | -2.4117612 | -0.0568071 |          |         |           |
| QOOH-3 = OH + 4-<br>ethyloxetan-2-ol   | C          | 0.05049378 | 0.08798737 | 0.03836736 | 1118.54i | 58.94   | 118.64    |
|                                        | C          | 0.01662771 | -0.0127245 | 1.55984329 | 248.79   | 274.55  | 316.72    |
|                                        | C          | 1.37910342 | 0.005878   | 2.14931381 | 337.20   | 344.21  | 459.95    |
|                                        | H          | 2.1185855  | -0.6348762 | 1.68271629 | 485.26   | 576.49  | 669.87    |
|                                        | C          | 1.65214562 | 0.50323719 | 3.5408879  | 740.40   | 804.90  | 869.61    |
|                                        | C          | 2.42475393 | 1.76320951 | 3.15852555 | 908.82   | 982.81  | 1028.54   |
|                                        | O          | 3.80769195 | 1.67283602 | 3.3050148  | 1030.77  | 1082.93 | 1084.68   |
|                                        | O          | 2.04577051 | 1.80386773 | 1.78289778 | 1096.87  | 1141.70 | 1158.5527 |
|                                        | O          | 2.50675491 | 3.33234592 | 1.33008003 | 1217.81  | 1267.94 | 1284.19   |
|                                        | H          | 0.53894943 | 1.01477142 | -0.2592905 | 1302.89  | 1323.07 | 1337.59   |
|                                        | H          | -0.9552436 | 0.07347268 | -0.378304  | 1413.61  | 1433.34 | 1450.22   |
|                                        | H          | 0.60600142 | -0.7457063 | -0.3930131 | 1468.89  | 1487.61 | 1503.11   |
|                                        | H          | -0.558082  | 0.81528359 | 1.97967665 | 1511.87  | 3004.95 | 3065.48   |
|                                        | H          | -0.496377  | -0.9352377 | 1.86300559 | 3082.36  | 3086.93 | 3135.94   |
|                                        | H          | 0.72712505 | 0.7478279  | 4.06047905 | 3136.48  | 3150.31 | 3153.14   |
|                                        | H          | 2.24250662 | -0.1681915 | 4.16416318 | 3172.88  | 3837.52 | 3846.85   |
|                                        | H          | 2.12957507 | 2.68578865 | 3.64987585 | ! 76.39  | 170.30  | 246.32    |
| H                                      | 4.10432311 | 0.84588413 | 2.91053466 | !Torsions  |          |         |           |
| H                                      | 3.44581249 | 3.13953195 | 1.21114359 |            |          |         |           |
| QOOH-3 = OH + Formic<br>acid +1-Butene | C          | 0.05786964 | 0.08723536 | 0.04047765 | 1071.94i | 61.53   | 65.91     |
|                                        | C          | 0.03165049 | 0.03330042 | 1.56335532 | 169.96   | 183.75  | 278.92    |
|                                        | C          | 1.36229795 | -0.0376459 | 2.22237173 | 324.54   | 334.15  | 456.52    |
|                                        | H          | 1.37061207 | -0.2620981 | 3.28074571 | 534.89   | 543.98  | 638.78    |
|                                        | C          | 2.5443102  | 0.48081311 | 1.65014307 | 678.45   | 796.38  | 856.58    |
|                                        | C          | 2.40090077 | 2.21535203 | 1.93797468 | 916.79   | 952.38  | 1000.64   |
|                                        | O          | 2.18740799 | 2.36338257 | 3.29838625 | 1031.28  | 1071.90 | 1107.75   |
|                                        | O          | 3.52897148 | 2.66393203 | 1.50019693 | 1146.53  | 1175.97 | 1202.71   |
|                                        | O          | 3.47372398 | 4.401536   | 1.90369135 | 1250.96  | 1272.82 | 1325.85   |
|                                        | H          | 0.55773111 | 0.98568171 | -0.3209921 | 1352.15  | 1376.84 | 1403.07   |
|                                        | H          | -0.9548975 | 0.09122181 | -0.35801   | 1413.53  | 1439.41 | 1460.95   |
|                                        | H          | 0.58113586 | -0.7763508 | -0.3707797 | 1504.06  | 1511.96 | 1527.36   |
|                                        | H          | -0.4812881 | 0.924416   | 1.95588148 | 2984.65  | 3015.66 | 3068.28   |
|                                        | H          | -0.5734244 | -0.8098298 | 1.904975   | 3073.59  | 3135.96 | 3144.13   |
|                                        | H          | 3.46588169 | 0.24791064 | 2.16878465 | 3147.63  | 3200.18 | 3226.73   |
|                                        | H          | 2.63152321 | 0.43682983 | 0.57060285 | 3777.71  | 3852.77 |           |
|                                        | H          | 1.51226535 | 2.49073676 | 1.35598512 | ! 95.43  | 132.55  | 237.32    |
| H                                      | 2.63438052 | 3.19561482 | 3.5123699  | 407.78 !   | Torsions |         |           |
| H                                      | 4.43101118 | 4.48623757 | 1.81305774 |            |          |         |           |
| QOOH-4 = OH+ 5-<br>methylTHF-2ol       | C          | -0.0006046 | -0.0015207 | 0.00074015 | 965.05i  | 56.02   | 113.73    |
|                                        | C          | 0.00128907 | 0.00125208 | 1.48724403 | 213.52   | 239.86  | 278.66    |
|                                        | H          | 0.9667455  | 0.00586158 | 1.97226609 | 327.40   | 379.01  | 497.43    |
|                                        | C          | -1.1665107 | 0.52587738 | 2.25235678 | 520.93   | 560.58  | 626.89    |

|                                 |            |            |            |            |           |         |         |
|---------------------------------|------------|------------|------------|------------|-----------|---------|---------|
|                                 | C          | -2.3115598 | -0.4680175 | 2.0930555  | 744.41    | 832.74  | 868.16  |
|                                 | C          | -1.8088081 | -1.8596345 | 2.43334162 | 902.16    | 982.67  | 996.09  |
|                                 | O          | -2.6366518 | -2.7817201 | 1.80869163 | 1020.53   | 1057.08 | 1110.73 |
|                                 | O          | -0.4587196 | -1.9803715 | 1.97631656 | 1132.21   | 1156.09 | 1171.08 |
|                                 | O          | -0.1784095 | -3.5274207 | 2.44183494 | 1218.53   | 1237.62 | 1303.82 |
|                                 | H          | 0.70387139 | -0.7358814 | -0.388153  | 1344.09   | 1365.14 | 1391.39 |
|                                 | H          | 0.3007383  | 0.97851019 | -0.3884613 | 1393.37   | 1421.11 | 1468.23 |
|                                 | H          | -0.986371  | -0.2279133 | -0.4037338 | 1475.68   | 1482.19 | 1492.99 |
|                                 | H          | -0.9055269 | 0.63325592 | 3.30530737 | 1502.70   | 3019.13 | 3033.48 |
|                                 | H          | -1.4734091 | 1.51186476 | 1.88698527 | 3037.60   | 3090.55 | 3103.83 |
|                                 | H          | -3.1681617 | -0.2255489 | 2.7208872  | 3106.88   | 3138.61 | 3145.19 |
|                                 | H          | -2.6583406 | -0.4968636 | 1.06019894 | 3208.26   | 3829.35 | 3870.46 |
|                                 | H          | -1.780899  | -2.0302052 | 3.5152007  | ! 135.56  | 187.44  | 443.60  |
|                                 | H          | -2.2404423 | -3.643596  | 1.98329788 | !Torsions |         |         |
|                                 | H          | 0.3617114  | -3.7618784 | 1.67905044 |           |         |         |
| QOOH-4 = OH +<br>Pentanoic Acid | C          | 0.00208335 | -0.0001258 | -0.0001084 | 1851.87i  | 55.87   | 135.77  |
|                                 | C          | 0.00045862 | 0.00016927 | 1.50027435 | 189.93    | 292.53  | 374.81  |
|                                 | H          | 0.98635538 | 0.00184249 | 1.96233964 | 415.03    | 438.41  | 519.91  |
|                                 | C          | -1.0238219 | -0.8472651 | 2.22929335 | 549.42    | 750.32  | 774.92  |
|                                 | C          | -1.4770029 | -0.0127388 | 3.4406249  | 829.81    | 843.71  | 882.83  |
|                                 | C          | -1.541089  | 1.39242983 | 2.8988228  | 941.22    | 985.32  | 994.86  |
|                                 | O          | -2.7318058 | 1.60724963 | 2.21831581 | 1048.30   | 1085.29 | 1123.85 |
|                                 | O          | -1.1884078 | 2.43251549 | 3.71413759 | 1141.90   | 1186.12 | 1227.68 |
|                                 | O          | -2.0367258 | 2.40215905 | 4.89803091 | 1253.62   | 1297.08 | 1318.80 |
|                                 | H          | 0.70125527 | 0.73067382 | -0.4050895 | 1364.79   | 1371.40 | 1388.13 |
|                                 | H          | -0.9941824 | 0.22375852 | -0.3860726 | 1404.84   | 1419.77 | 1478.34 |
|                                 | H          | 0.28698764 | -0.9811221 | -0.3960314 | 1488.59   | 1492.25 | 1496.05 |
|                                 | H          | -1.8784700 | -1.0246199 | 1.57391405 | 1656.28   | 3024.91 | 3069.67 |
|                                 | H          | -0.6312215 | -1.818849  | 2.53163228 | 3088.44   | 3091.70 | 3107.69 |
|                                 | H          | -2.4276368 | -0.335852  | 3.86157957 | 3120.98   | 3135.40 | 3146.88 |
|                                 | H          | -0.7223595 | -0.0278753 | 4.22692674 | 3816.64   | 3854.03 |         |
|                                 | H          | -0.5391725 | 1.19001648 | 2.01099195 | ! 127.30  | 164.55  | 235.22  |
| H                               | -2.6560647 | 2.43116493 | 1.72600456 | 357.50     | !Torsions |         |         |
| H                               | -2.8556776 | 2.78257755 | 4.55411529 |            |           |         |         |
| QOOH-5 = OH +<br>Pentanoic Acid | C          | 0.00179151 | -0.0134966 | -0.0045788 | 1798.67i  | 87.19   | 115.11  |
|                                 | H          | 0.00229687 | -0.0151468 | 1.0845067  | 262.27    | 283.63  | 324.00  |
|                                 | H          | 1.00097335 | -0.0168818 | -0.4272928 | 381.69    | 423.30  | 506.76  |
|                                 | C          | -1.0130856 | -0.9394692 | -0.6311794 | 558.41    | 570.54  | 662.83  |
|                                 | C          | -2.4434201 | -0.4325314 | -0.4087368 | 817.57    | 832.81  | 855.62  |
|                                 | C          | -2.6550464 | 0.93752188 | -1.0533968 | 921.61    | 969.89  | 996.88  |
|                                 | C          | -1.6726709 | 1.94519795 | -0.5224291 | 1010.75   | 1039.01 | 1095.19 |
|                                 | O          | -1.4992491 | 3.02005224 | -1.3590414 | 1095.84   | 1145.77 | 1205.90 |
|                                 | O          | -2.0655684 | 2.31082105 | 0.7703029  | 1217.35   | 1265.63 | 1292.79 |
|                                 | O          | -1.0197148 | 3.10950208 | 1.31587218 | 1335.92   | 1363.84 | 1377.92 |
|                                 | H          | -0.8270323 | -1.0130576 | -1.7055447 | 1387.39   | 1392.36 | 1448.05 |
|                                 | H          | -0.9210599 | -1.9526499 | -0.2290326 | 1458.97   | 1474.69 | 1488.64 |
|                                 | H          | -3.159999  | -1.1420809 | -0.8217997 | 1498.46   | 1561.05 | 3038.64 |
|                                 | H          | -2.6428754 | -0.362908  | 0.66329921 | 3059.39   | 3063.42 | 3081.44 |
|                                 | H          | -2.4951139 | 0.87899394 | -2.1310671 | 3097.49   | 3111.15 | 3121.35 |
|                                 | H          | -3.6711522 | 1.30532672 | -0.8892121 | 3190.67   | 3808.91 | 3843.47 |
|                                 | H          | -0.5904777 | 1.22286451 | -0.3364421 | ! 142.20  | 268.59  | 446.18  |
| H                               | -0.9464475 | 3.66058381 | -0.8967061 | !Torsions  |           |         |         |
| H                               | -0.4839108 | 2.44743117 | 1.77251772 |            |           |         |         |

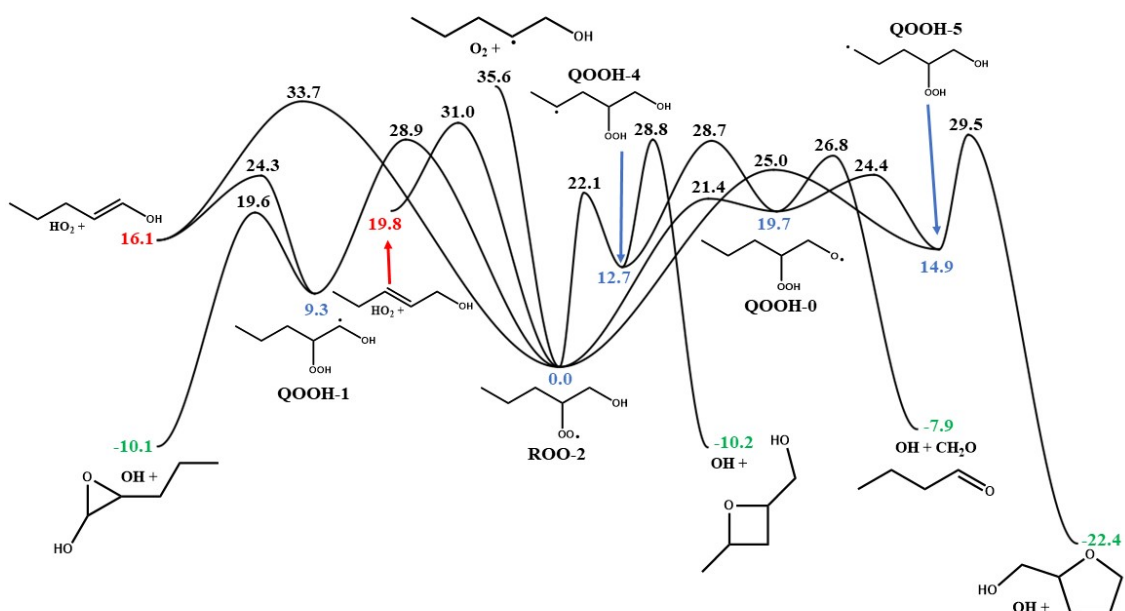

**Figure S7.** Potential energy surface for n-Pentanol ROO2 calculated at CCSD(T)/cc-pV $\infty$ Z//M06-2X/cc-pVTZ level of theory. Energies are given in kcal/mol. QOOH energies are given in blue, HO<sub>2</sub> producing routes in red, OH producing rates in green.

**Table S11.** Calculated relative energies for n-Pentanol ROO2 PES

| Species                                                                               | Relative energy (kcal/mol) |
|---------------------------------------------------------------------------------------|----------------------------|
| N-pentanol ROO2                                                                       | 0.0                        |
| QOOH-0                                                                                | 19.7                       |
| QOOH-1                                                                                | 9.3                        |
| QOOH-4                                                                                | 12.7                       |
| QOOH-5                                                                                | 14.9                       |
| HO <sub>2</sub> + 1-Penten-1-ol                                                       | 16.1                       |
| HO <sub>2</sub> + 2-Penten-1-ol                                                       | 19.8                       |
| O <sub>2</sub> + CH <sub>3</sub> CH <sub>2</sub> CH <sub>2</sub> CHCH <sub>2</sub> OH | 35.6                       |
| OH + CH <sub>2</sub> O + butanal                                                      | -7.9                       |
| OH + 3-propyloxiran-2-ol                                                              | -10.1                      |
| OH + (4-methyl-2-oxetanyl)methanol                                                    | -10.2                      |
| OH + Tetrahydrofurfuryl alcohol                                                       | -22.4                      |
| N-pentanol ROO2 = QOOH-0                                                              | 21.4                       |
| N-pentanol ROO2 = QOOH-1                                                              | 28.9                       |
| N-pentanol ROO2 = QOOH-4                                                              | 22.1                       |
| N-pentanol ROO2 = QOOH-5                                                              | 25.0                       |

|                                                   |      |
|---------------------------------------------------|------|
| N-pentanol ROO2 = HO <sub>2</sub> + 1-Penten-1-ol | 33.7 |
| N-pentanol ROO3 = HO <sub>2</sub> + 2-Penten-1-ol | 31.0 |
| QOOH-0 = OH + CH <sub>2</sub> O + butanal         | 26.8 |
| QOOH-0 = QOOH-4                                   | 28.7 |
| QOOH-1 = OH + 3-propyloxiran-2-ol                 | 19.6 |
| QOOH-1 = HO <sub>2</sub> + 1-Penten-1-ol          | 24.3 |
| QOOH-4 = OH + (4-methyl-2-oxetanyl)methanol       | 28.8 |
| QOOH-5 = QOOH-0                                   | 24.4 |
| QOOH-5 = OH + Tetrahydrofurfuryl alcohol          | 29.5 |

**Table S12.** Optimized geometries and frequencies (m062x/cc-pVTZ) of relevant stationary points on the calculated n-Pentanol ROO2 PES

| Species                                                                                                   | Geometry      |               |               | Frequencies (cm <sup>-1</sup> ) |         |         |              |
|-----------------------------------------------------------------------------------------------------------|---------------|---------------|---------------|---------------------------------|---------|---------|--------------|
| 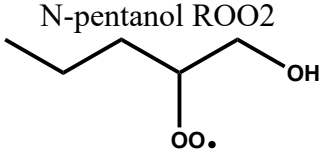 <p>N-pentanol ROO2</p> | O             | -0.0137725585 | 0.0351188265  | -0.0017996434                   | 133.52  | 265.55  | 319.59       |
|                                                                                                           | C             | 0.0089685856  | -0.0004797956 | 1.4013799905                    | 367.38  | 423.65  | 461.92       |
|                                                                                                           | O             | 2.7420061517  | -0.0366680441 | 0.6565751435                    | 615.61  | 739.88  | 829.87       |
|                                                                                                           | O             | 2.381677761   | 0.1306136745  | 1.891028599                     | 886.14  | 918.21  | 999.27       |
|                                                                                                           | C             | 1.1149780663  | 0.8415367247  | 2.0160082765                    | 1039.84 | 1076.04 | 1105.12      |
|                                                                                                           | C             | 0.932854332   | 1.0878337691  | 3.4986630891                    | 1136.35 | 1152.55 | 1179.21      |
|                                                                                                           | C             | 2.0286731862  | 1.9510156159  | 4.1145537474                    | 1239.82 | 1255.49 | 1280.7       |
|                                                                                                           | C             | 1.7947533654  | 2.1899868081  | 5.6001599505                    | 1308.44 | 1333.59 | 1337.76      |
|                                                                                                           | H             | 0.8403882607  | 2.6906073973  | 5.7696614127                    | 1373.0  | 1397.8  | 1417.98      |
|                                                                                                           | H             | 2.5793891     | 2.8098963387  | 6.031107338                     | 1418.43 | 1449.04 | 1477.29      |
|                                                                                                           | H             | 1.7760796818  | 1.2461269085  | 6.146488758                     | 1498.51 | 1505.59 | 1505.76      |
|                                                                                                           | H             | 2.0678675744  | 2.9065597041  | 3.5858477367                    | 1513.78 | 3024.13 | 3051.19      |
|                                                                                                           | H             | 2.9958813752  | 1.470759379   | 3.9625242383                    | 3059.68 | 3064.89 | 3086.9       |
|                                                                                                           | H             | 0.8827175834  | 0.123259302   | 4.0123603444                    | 3095.05 | 3108.11 | 3115.14      |
|                                                                                                           | H             | -0.0369949322 | 1.5706122876  | 3.6383342813                    | 3131.7  | 3140.81 | 3843.49      |
|                                                                                                           | H             | 1.2285694706  | 1.7721085073  | 1.4559869283                    | ! 55.35 | 76.44   | 91.11 180.59 |
|                                                                                                           | H             | 0.1046953865  | -1.0241663679 | 1.784028979                     | 250.58  | 436.72  | ! Torsions   |
| H                                                                                                         | -0.9480796231 | 0.3951129139  | 1.7427311165  |                                 |         |         |              |
| H                                                                                                         | 0.8785022437  | -0.1473229366 | -0.3151303291 |                                 |         |         |              |
|  <p>QOOH-0</p>         | O             | -0.0114362634 | 0.0144662915  | 0.0055735152                    | 113.44  | 275.5   | 317.48       |
|                                                                                                           | C             | 0.0005462864  | -0.0090862534 | 1.3562267161                    | 361.2   | 377.57  | 483.35       |
|                                                                                                           | O             | 2.6586367505  | 0.0394888668  | -0.0432641139                   | 588.39  | 743.27  | 793.46       |
|                                                                                                           | O             | 2.4138821232  | -0.3290115141 | 1.2996567402                    | 820.75  | 853.17  | 915.79       |
|                                                                                                           | C             | 1.4160540919  | 0.5023169529  | 1.8256030459                    | 988.67  | 1060.11 | 1069.79      |
|                                                                                                           | C             | 1.5179783832  | 0.4287849059  | 3.3382659699                    | 1074.72 | 1116.44 | 1155.67      |
|                                                                                                           | C             | 2.7814319272  | 1.0967610179  | 3.8697195992                    | 1189.53 | 1235.1  | 1269.07      |
|                                                                                                           | C             | 2.8849174525  | 0.9848931206  | 5.3850672337                    | 1282.89 | 1292.79 | 1334.34      |
|                                                                                                           | H             | 2.0285223296  | 1.4538212718  | 5.8719519241                    | 1343.32 | 1381.19 | 1406.16      |
|                                                                                                           | H             | 3.7872272861  | 1.4680625357  | 5.7568601482                    | 1416.11 | 1459.68 | 1478.05      |
|                                                                                                           | H             | 2.9126547817  | -0.0601991446 | 5.6959158582                    | 1498.99 | 1504.4  | 1513.8       |
|                                                                                                           | H             | 2.781893151   | 2.1484089181  | 3.5740064657                    | 1524.27 | 2992.84 | 3053.95      |
|                                                                                                           | H             | 3.6499546723  | 0.6374978025  | 3.3974047022                    | 3056.67 | 3059.3  | 3067.42      |
|                                                                                                           | H             | 1.499112876   | -0.6232515446 | 3.6344209068                    | 3090.02 | 3100.88 | 3114.14      |
|                                                                                                           | H             | 0.6341648011  | 0.9015692792  | 3.7723123523                    | 3132.82 | 3139.63 | 3703.6       |
|                                                                                                           | H             | 1.5574839307  | 1.5183496566  | 1.4529298587                    | ! 73.56 | 91.19   | 155.41       |
|                                                                                                           | H             | -0.0863589872 | -1.0273503472 | 1.7549397337                    | 202.91  | 246.48  | 405.13 !     |
| H                                                                                                         | -0.7441997869 | 0.6616137328  | 1.8016703307  | Torsions                        |         |         |              |
| H                                                                                                         | 1.9017011888  | -0.3615655883 | -0.5031840149 |                                 |         |         |              |



|                                                                                                   |              |               |               |               |          |         |               |
|---------------------------------------------------------------------------------------------------|--------------|---------------|---------------|---------------|----------|---------|---------------|
| 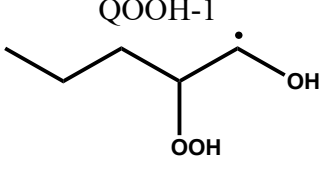 <p>QOOH-1</p>   | C            | -0.0006741622 | 0.0051559382  | -0.0039797398 | 192.8    | 282.31  | 323.67        |
|                                                                                                   | C            | -0.0019374669 | -0.010233894  | 1.5203225107  | 368.8    | 437.83  | 455.81        |
|                                                                                                   | C            | 1.3966656133  | -0.0146330658 | 2.1304618713  | 604.54   | 691.14  | 768.05        |
|                                                                                                   | C            | 2.2458936845  | 1.1680192806  | 1.6952120962  | 851.93   | 896.91  | 921.63        |
|                                                                                                   | O            | 1.5424045945  | 2.4213732435  | 1.7367573737  | 1003.73  | 1042.97 | 1049.0        |
|                                                                                                   | O            | 1.0158573082  | 2.6133404642  | 3.0416501684  | 1094.13  | 1151.21 | 1163.43       |
|                                                                                                   | C            | 3.5052102263  | 1.3010329697  | 2.4730073805  | 1198.35  | 1238.55 | 1273.06       |
|                                                                                                   | O            | 4.3097122608  | 2.3567580832  | 2.190394273   | 1314.65  | 1345.55 | 1362.23       |
|                                                                                                   | H            | 0.3895176051  | 0.9476667412  | -0.3879343412 | 1383.71  | 1398.07 | 1417.25       |
|                                                                                                   | H            | -1.0099415223 | -0.1141137831 | -0.3958406505 | 1425.43  | 1466.41 | 1481.95       |
|                                                                                                   | H            | 0.611142916   | -0.8052784798 | -0.4058709437 | 1496.34  | 1504.74 | 1515.94       |
|                                                                                                   | H            | -0.5450800141 | 0.8573307576  | 1.896204915   | 3001.4   | 3056.34 | 3058.96       |
|                                                                                                   | H            | -0.5321415848 | -0.8942191478 | 1.8778241312  | 3074.61  | 3107.94 | 3114.6        |
|                                                                                                   | H            | 1.3264479549  | -0.0167267268 | 3.2185120988  | 3130.32  | 3138.01 | 3239.27       |
|                                                                                                   | H            | 1.9315046169  | -0.9227112902 | 1.8381620475  | 3770.83  | 3808.96 |               |
|                                                                                                   | H            | 2.4665363417  | 1.1026421955  | 0.6201518107  | ! 71.1   | 91.85   | 120.6         |
|                                                                                                   | H            | 1.8040864736  | 2.8219373076  | 3.5640349521  | 166.06   | 246.14  | 262.89        |
| H                                                                                                 | 4.0172946152 | 0.4551714206  | 2.9047496086  | 556.08!       | Torsions |         |               |
| H                                                                                                 | 3.7789575823 | 3.0234570056  | 1.73541942    |               |          |         |               |
|  <p>QOOH-4</p>  | C            | -0.0031563251 | 0.0261434753  | 0.0163391195  | 204.55   | 265.13  | 305.84        |
|                                                                                                   | C            | 0.0051924389  | 0.0234881087  | 1.5041583883  | 342.87   | 423.55  | 474.06        |
|                                                                                                   | C            | 1.2932094869  | 0.0217879875  | 2.2560362621  | 578.45   | 643.31  | 846.18        |
|                                                                                                   | C            | 2.2959691568  | 1.0610918754  | 1.7585405006  | 877.05   | 907.33  | 974.3         |
|                                                                                                   | O            | 1.6862006905  | 2.3224569899  | 1.4799570469  | 999.67   | 1017.41 | 1083.88       |
|                                                                                                   | O            | 1.0040472341  | 2.7658224204  | 2.6454899863  | 1098.84  | 1126.68 | 1159.41       |
|                                                                                                   | C            | 3.4555751917  | 1.254304707   | 2.7176048685  | 1173.69  | 1222.63 | 1257.85       |
|                                                                                                   | O            | 4.3945460635  | 2.1707216015  | 2.2088132967  | 1273.35  | 1370.52 | 1377.84       |
|                                                                                                   | H            | 0.5168145852  | 0.9006398147  | -0.3819815366 | 1390.61  | 1403.37 | 1414.8        |
|                                                                                                   | H            | -1.0158368504 | 0.0226028906  | -0.3809970813 | 1421.76  | 1439.23 | 1467.58       |
|                                                                                                   | H            | 0.5126391608  | -0.8560836522 | -0.3852874216 | 1479.94  | 1495.48 | 1508.93       |
|                                                                                                   | H            | 0.1081513496  | 2.4424858327  | 2.4726333835  | 2990.07  | 3002.97 | 3044.18       |
|                                                                                                   | H            | -0.8876228393 | -0.2815828648 | 2.032262258   | 3078.03  | 3082.29 | 3098.95       |
|                                                                                                   | H            | 1.1101758779  | 0.1774035325  | 3.320278347   | 3114.78  | 3144.47 | 3199.08       |
|                                                                                                   | H            | 1.7859620696  | -0.957495677  | 2.1694693457  | 3775.64  | 3854.16 |               |
|                                                                                                   | H            | 2.6898318669  | 0.7854812018  | 0.7769193682  | ! 75.16  | 113.51  | 172.46 100.96 |
|                                                                                                   | H            | 3.0623461133  | 1.5796268829  | 3.6864431589  | 147.3    | 386.11  | 400.42        |
| H                                                                                                 | 3.9721104808 | 0.30457683    | 2.8604039423  | !Torsions     |          |         |               |
| H                                                                                                 | 3.9094492778 | 2.96736204    | 1.9706237813  |               |          |         |               |
|  <p>QOOH-5</p> | C            | -0.0166249891 | 0.088259702   | 0.0246507428  | 218.61   | 260.6   | 306.55        |
|                                                                                                   | C            | 0.0079394488  | -0.0269897986 | 1.5063690839  | 347.52   | 453.61  | 508.31        |
|                                                                                                   | C            | 1.4246018052  | -0.0244058393 | 2.0845983071  | 526.87   | 686.75  | 785.01        |
|                                                                                                   | C            | 2.1960872591  | 1.2495903324  | 1.7818639741  | 865.76   | 892.79  | 921.9         |
|                                                                                                   | C            | 3.593873891   | 1.2551514553  | 2.3813073039  | 963.53   | 1008.35 | 1053.12       |
|                                                                                                   | O            | 3.5543574948  | 1.1364909216  | 3.786153703   | 1092.77  | 1116.21 | 1135.12       |
|                                                                                                   | O            | 1.4257721011  | 2.3035447691  | 2.3627315133  | 1177.28  | 1211.8  | 1237.83       |
|                                                                                                   | O            | 1.9904608592  | 3.5430141346  | 1.954155226   | 1272.48  | 1320.4  | 1366.37       |
|                                                                                                   | H            | 1.3443413618  | 3.8403402591  | 1.3024427268  | 1377.61  | 1384.76 | 1407.23       |
|                                                                                                   | H            | -0.8580450391 | 0.5272722088  | -0.4888886069 | 1423.95  | 1427.81 | 1465.7        |
|                                                                                                   | H            | 0.7064072685  | -0.4519538591 | -0.5713152957 | 1474.95  | 1489.12 | 1511.9        |
|                                                                                                   | H            | -0.5714230285 | 0.7804506942  | 1.9552583811  | 2994.4   | 3046.33 | 3063.66       |
|                                                                                                   | H            | -0.4831930269 | -0.9586204286 | 1.8181267816  | 3067.63  | 3100.04 | 3116.41       |
|                                                                                                   | H            | 1.3986246137  | -0.1676029168 | 3.1647273527  | 3125.87  | 3162.86 | 3267.16       |
|                                                                                                   | H            | 1.9957910119  | -0.8566540075 | 1.6656442918  | 3828.09  | 3853.47 |               |
|                                                                                                   | H            | 2.2525598997  | 1.4150354962  | 0.7005994159  | !40.48   | 81.33   | 121.96        |
|                                                                                                   | H            | 4.1536713667  | 0.4000522281  | 2.0013543876  | 151.83   | 171.78  | 241.76 405.8  |
| H                                                                                                 | 4.1125040176 | 2.1678156181  | 2.0773942226  | !Torsions     |          |         |               |

|                                                                                                                           |                                                                                                                                                                                 |               |               |               |              |           |         |
|---------------------------------------------------------------------------------------------------------------------------|---------------------------------------------------------------------------------------------------------------------------------------------------------------------------------|---------------|---------------|---------------|--------------|-----------|---------|
|                                                                                                                           | H                                                                                                                                                                               | 2.9845397019  | 1.8405050378  | 4.1124985004  |              |           |         |
| 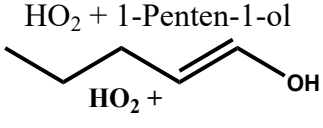 <p>HO<sub>2</sub> + 1-Penten-1-ol</p>   | O                                                                                                                                                                               | 0.50553254    | 2.59512924    | 1.64024162    | 1161.48      | 1475.38   | 3553.10 |
|                                                                                                                           | O                                                                                                                                                                               | -0.1679742    | 2.44348437    | 0.50783059    |              |           |         |
|                                                                                                                           | H                                                                                                                                                                               | -0.2367003    | 1.48037439    | 0.35008979    | 201.42       | 287.30    | 415.29  |
|                                                                                                                           |                                                                                                                                                                                 |               |               |               | 563.33       | 664.50    | 753.58  |
|                                                                                                                           | C                                                                                                                                                                               | 0.0002579884  | -0.0001046157 | 0.0007811153  | 768.18       | 881.43    | 902.93  |
|                                                                                                                           | H                                                                                                                                                                               | -0.0005750367 | -0.0001885655 | 1.0917343967  | 983.92       | 989.49    | 1063.95 |
|                                                                                                                           | H                                                                                                                                                                               | 1.036987631   | 0.0001326844  | -0.3334129125 | 1089.11      | 1120.74   | 1146.50 |
|                                                                                                                           | H                                                                                                                                                                               | -0.457481237  | -0.9343578466 | -0.3287794854 | 1232.78      | 1269.62   | 1299.59 |
|                                                                                                                           | C                                                                                                                                                                               | -0.7634959325 | 1.200668278   | -0.5404506435 | 1326.13      | 1350.50   | 1381.26 |
|                                                                                                                           | H                                                                                                                                                                               | -0.2847980538 | 2.127523091   | -0.2183987848 | 1413.82      | 1436.05   | 1493.71 |
|                                                                                                                           | H                                                                                                                                                                               | -0.7328410033 | 1.2082938787  | -1.6328674925 | 1503.09      | 1504.42   | 1518.38 |
|                                                                                                                           | C                                                                                                                                                                               | -2.2262137848 | 1.2158236436  | -0.0836282254 | 1757.41      | 3021.52   | 3055.19 |
|                                                                                                                           | H                                                                                                                                                                               | -2.2568877069 | 1.19808253    | 1.0076724603  | 3058.58      | 3079.19   | 3096.84 |
|                                                                                                                           | H                                                                                                                                                                               | -2.7066604701 | 0.2817656292  | -0.3985029262 | 3125.29      | 3136.16   | 3208.54 |
|                                                                                                                           | C                                                                                                                                                                               | -2.9905040891 | 2.4055515018  | -0.5884645294 | 3232.69      | 3867.09   |         |
|                                                                                                                           | H                                                                                                                                                                               | -2.9948154737 | 3.3074902263  | 0.007452236   | ! 37.26      | 97.92     | 241.49  |
|                                                                                                                           | C                                                                                                                                                                               | -3.6345671979 | 2.4459327453  | -1.7482586839 | 350.56       | !Torsions |         |
|                                                                                                                           | H                                                                                                                                                                               | -4.1630400515 | 3.3246870882  | -2.0904510077 |              |           |         |
|                                                                                                                           | O                                                                                                                                                                               | -3.7333116157 | 1.4344729089  | -2.6516855017 |              |           |         |
|                                                                                                                           | H                                                                                                                                                                               | -3.2504940332 | 0.6678808764  | -2.3283760216 |              |           |         |
|  <p>HO<sub>2</sub> + 2-Penten-1-ol</p> | O                                                                                                                                                                               | 0.50553254    | 2.59512924    | 1.64024162    | 1161.48      | 1475.38   | 3553.10 |
|                                                                                                                           | O                                                                                                                                                                               | -0.1679742    | 2.44348437    | 0.50783059    |              |           |         |
|                                                                                                                           | H                                                                                                                                                                               | -0.2367003    | 1.48037439    | 0.35008979    |              |           |         |
|                                                                                                                           |                                                                                                                                                                                 |               |               |               | 186.84       | 211.96    | 263.32  |
|                                                                                                                           | C                                                                                                                                                                               | -0.000325     | 0.0021708     | 1.41000729    | 511.73       | 666.54    | 717.51  |
|                                                                                                                           | C                                                                                                                                                                               | 1.36752406    | 0.0054969     | 2.02862908    | 834.34       | 897.61    | 952.18  |
|                                                                                                                           | C                                                                                                                                                                               | 2.49830442    | -0.1306882    | 1.35124778    | 1009.01      | 1028.98   | 1050.91 |
|                                                                                                                           | C                                                                                                                                                                               | 3.88213291    | -0.1264388    | 1.93148228    | 1112.86      | 1117.79   | 1158.51 |
|                                                                                                                           | C                                                                                                                                                                               | 3.95085596    | 0.05489942    | 3.43977648    | 1218.88      | 1294.18   | 1299.47 |
|                                                                                                                           | H                                                                                                                                                                               | 3.50308669    | 1.00214471    | 3.74206539    | 1339.65      | 1379.45   | 1383.16 |
|                                                                                                                           | H                                                                                                                                                                               | 4.98437523    | 0.04757593    | 3.78232763    | 1416.67      | 1422.59   | 1481.87 |
|                                                                                                                           | H                                                                                                                                                                               | 3.42017156    | -0.7459438    | 3.9551955     | 1503.34      | 1506.78   | 1512.30 |
|                                                                                                                           | H                                                                                                                                                                               | 4.46145392    | 0.66011685    | 1.43908344    | 1767.83      | 3015.22   | 3044.94 |
|                                                                                                                           | H                                                                                                                                                                               | 4.37403529    | -1.0620802    | 1.65020816    | 3063.49      | 3067.58   | 3083.51 |
|                                                                                                                           | H                                                                                                                                                                               | 2.43683489    | -0.2763714    | 0.27700455    | 3130.49      | 3140.36   | 3166.05 |
|                                                                                                                           | H                                                                                                                                                                               | 1.38431859    | 0.13218972    | 3.10648502    | 3174.59      | 3869.89   |         |
|                                                                                                                           | H                                                                                                                                                                               | -0.540868     | -0.895914     | 1.71667489    | ! 82.75      | 231.01    | 301.73  |
|                                                                                                                           | H                                                                                                                                                                               | -0.5712518    | 0.8550729     | 1.79663322    | 359.59       | !Torsions |         |
|                                                                                                                           | H                                                                                                                                                                               | 0.46723818    | 0.77699436    | -0.3009978    |              |           |         |
|                                                                                                                           |  <p>O<sub>2</sub> +<br/>CH<sub>3</sub>CH<sub>2</sub>CH<sub>2</sub>CH(OH)CH<sub>2</sub>OH</p> | O             | 0.00000000    | 0.00000000    | 0.0079491871 | 1758.25   |         |
| O                                                                                                                         |                                                                                                                                                                                 | 0.00000000    | 0.00000000    | 1.1978125329  |              |           |         |
|                                                                                                                           |                                                                                                                                                                                 |               |               |               | 233.86       | 318.73    | 373.01  |
| C                                                                                                                         |                                                                                                                                                                                 | 0.1115273511  | 0.0514116198  | 1.3320800493  | 482.42       | 566.71    | 777.81  |
| C                                                                                                                         |                                                                                                                                                                                 | 1.3261393348  | -0.1628669692 | 2.1630193742  | 833.4        | 884.27    | 918.51  |
| C                                                                                                                         |                                                                                                                                                                                 | 2.375267668   | -1.139978931  | 1.7605796537  | 976.17       | 1028.97   | 1065.37 |
| C                                                                                                                         |                                                                                                                                                                                 | 3.7734955206  | -0.5156371674 | 1.6415628588  | 1084.49      | 1135.69   | 1164.75 |
| C                                                                                                                         |                                                                                                                                                                                 | 3.8425059103  | 0.5626231706  | 0.567216665   | 1208.3       | 1244.88   | 1282.08 |
| H                                                                                                                         |                                                                                                                                                                                 | 2.1012880769  | -1.5823810758 | 0.8002616877  | 1338.98      | 1363.35   | 1375.08 |
| H                                                                                                                         |                                                                                                                                                                                 | 2.4223778676  | -1.9559777492 | 2.4909054459  | 1404.64      | 1413.92   | 1426.9  |
| H                                                                                                                         |                                                                                                                                                                                 | -0.5322072421 | -0.8355165242 | 1.3428464339  | 1476.88      | 1494.28   | 1501.64 |
| H                                                                                                                         |                                                                                                                                                                                 | -0.4803616786 | 0.8826933349  | 1.7260680624  | 1502.53      | 1513.52   | 3018.03 |
| H                                                                                                                         |                                                                                                                                                                                 | 1.0601347958  | 0.9641254273  | -0.1012516677 | 3021.05      | 3051.18   | 3057.32 |
| H                                                                                                                         |                                                                                                                                                                                 | 4.0613861415  | -0.0929446286 | 2.6070992342  | 3058.0       | 3086.04   | 3097.29 |

|                                                                                                                                                 |                                                                                                                                                                                                                                                                                                                                                                                                                                                                                                                                                                                                                                                                                                                                                                                                                                                            |                                                                                                                                                                                                                                                                                                                                                                                                                           |
|-------------------------------------------------------------------------------------------------------------------------------------------------|------------------------------------------------------------------------------------------------------------------------------------------------------------------------------------------------------------------------------------------------------------------------------------------------------------------------------------------------------------------------------------------------------------------------------------------------------------------------------------------------------------------------------------------------------------------------------------------------------------------------------------------------------------------------------------------------------------------------------------------------------------------------------------------------------------------------------------------------------------|---------------------------------------------------------------------------------------------------------------------------------------------------------------------------------------------------------------------------------------------------------------------------------------------------------------------------------------------------------------------------------------------------------------------------|
|                                                                                                                                                 | H 4.4934750885 -1.3045231978 1.4173519748<br>H 4.8575879855 0.9372720622 0.4411711695<br>H 3.2080181561 1.4118463651 0.8290556603<br>H 3.5036498481 0.1708663143 -0.3937586388<br>H 1.39405882 0.3118660948 3.133530662                                                                                                                                                                                                                                                                                                                                                                                                                                                                                                                                                                                                                                    | 3119.86 3134.03 3188.11<br>3867.8<br>!60.58 87.63 149.04<br>270.77 329.41! !Torsions                                                                                                                                                                                                                                                                                                                                      |
| OH + CH <sub>2</sub> O + butanal<br>OH + CH <sub>2</sub> O<br> | O 0.0000 0.0000 -0.0057106914<br>H 0.0000 0.0000 0.9657106914<br><br>O 1.7521438715 -0.7145028218 0.7374050535<br>C 1.5820425223 -0.4681554342 -0.4198612336<br>H 1.9266415225 0.4785644408 -0.8705350011<br>H 1.0717640837 -1.1748521847 -1.0968368189<br><br>C -0.00441 6.5214E-05 0.01515082<br>C -0.0010062 -0.0001334 1.53786123<br>H 1.00927224 0.00029531 -0.3828154<br>H -0.5164751 -0.8805809 -0.3756112<br>H -0.5167844 0.88063386 -0.3753805<br>C -1.4078027 -0.0004388 2.11022091<br>H 0.53550842 -0.8703149 1.91771071<br>H 0.53522414 0.87012322 1.91793976<br>H -1.9800247 0.86885699 1.76638835<br>H -1.9797315 -0.8698463 1.76618297<br>C -1.4563209 -0.0006242 3.61189392<br>O -0.487602 -0.0005392 4.32036482<br>H -2.4711876 -0.0008527 4.05519724                                                                                     | 3776.00<br><br>1218.60 1279.77 1546.46<br>1877.08 2943.66 3014.59<br><br>198.60 351.22 670.56<br>702.76 793.34 871.50<br>954.96 971.92 1068.76<br>1144.92 1164.05 1257.19<br>1314.53 1323.40 1404.53<br>1418.67 1427.04 1455.41<br>1494.84 1506.11 1511.73<br>1865.57 2942.87 3036.88<br>3057.95 3063.44 3081.03<br>3107.91 3131.17 3137.91<br>! 88.93 181.14 249.11<br>!Torsions                                         |
| OH + 3-propyloxiran-2-ol<br>                                 | O 0.0000 0.0000 -0.0057106914<br>H 0.0000 0.0000 0.9657106914<br><br>C -0.0015425449 0.0425658773 -0.0068077915<br>C -0.0024275245 -0.0277787832 1.5141137344<br>C 1.4095505263 -0.0528049347 2.0920743573<br>C 1.3995437881 -0.082587317 3.5913421869<br>C 2.3055280743 0.705725944 4.4235498173<br>H 3.0751666634 1.3173013291 3.9671799678<br>O 2.6766408932 0.3534867992 5.6984173772<br>O 0.9870977841 1.1394811938 4.2360600239<br>H 0.5101336965 0.9419227254 -0.3521202489<br>H -1.0145502579 0.0600571194 -0.4065023965<br>H 0.5139503148 -0.8175237247 -0.436850982<br>H -0.5327523943 0.8304212575 1.9307354686<br>H -0.5414425083 -0.9193128839 1.8444679658<br>H 1.9514096126 -0.9266121567 1.7200710439<br>H 1.9568051437 0.8334372143 1.7610281308<br>H 0.9643738645 -0.9697590678 4.0475005686<br>H 1.924113323 -0.0650954912 6.1284381045 | 3776.00<br><br>124.0 319.13 334.82 349.58<br>538.27 590.39 745.17 819.41<br>894.6 909.85 970.22 1022.84<br>1070.28 1086.61 1131.47<br>1147.87 1155.82 1189.98<br>1265.45 1296.49 1302.48<br>1317.52 1333.01 1388.15<br>1415.88 1423.61 1474.51<br>1497.37 1504.76 1511.79<br>1542.57 3049.26 3057.08<br>3060.71 3085.29 3103.05<br>3120.02 3128.14 3137.31<br>3177.42 3863.49<br>! Torsions 74.88 97.38<br>234.01 248.25! |
| OH + (4-methyl-2-oxetanyl)methanol<br>                       | O 0.0000 0.0000 -0.0057106914<br>H 0.0000 0.0000 0.9657106914<br><br>C 0.0628472265 -0.0652191921 0.0107090042<br>C -0.0068669249 -0.0034407848 1.514175257<br>H 0.9957505578 0.0335840719 1.9474178052<br>C -0.9776649968 1.0012231204 2.1517029988<br>C -1.5795241984 -0.2306612892 2.8398818927<br>C -3.0354680207 -0.5422470306 2.5780635062<br>O -3.3101910399 -0.5742580069 1.1959802291                                                                                                                                                                                                                                                                                                                                                                                                                                                             | 3776.00<br><br>71.12 255.91 333.95 351.22<br>450.13 635.4 686.38 827.2<br>887.46 924.11 932.08 945.72<br>1014.96 1065.41 1118.18<br>1129.08 1148.46 1162.35<br>1211.34 1221.92 1257.13<br>1296.16 1343.98 1364.53                                                                                                                                                                                                         |

|                                                                                                                            |                                                                                                                                                                                                                                                                                                                                                                                                                                                                                                                                                                                                                                                                                                                                                                                                                                                                           |                                                                                                                                                                                                                                                                                                                                                                                                                                                            |
|----------------------------------------------------------------------------------------------------------------------------|---------------------------------------------------------------------------------------------------------------------------------------------------------------------------------------------------------------------------------------------------------------------------------------------------------------------------------------------------------------------------------------------------------------------------------------------------------------------------------------------------------------------------------------------------------------------------------------------------------------------------------------------------------------------------------------------------------------------------------------------------------------------------------------------------------------------------------------------------------------------------|------------------------------------------------------------------------------------------------------------------------------------------------------------------------------------------------------------------------------------------------------------------------------------------------------------------------------------------------------------------------------------------------------------------------------------------------------------|
|                                                                                                                            | O -0.7360838036 -1.1182937036 2.0777873244<br>H -0.9416972371 -0.0550503705 -0.4139208566<br>H 0.573809418 -0.973008901 -0.3097333864<br>H 0.6103412429 0.7947360282 -0.3769290029<br>H -0.5442740466 1.7550597509 2.8015104081<br>H -1.6542174872 1.4580935106 1.4322629294<br>H -1.3610615397 -0.3006993013 3.9087609385<br>H -3.2876988806 -1.4985317363 3.0494685603<br>H -3.663947984 0.23224619713 .0197114653<br>H -2.6760713034 -1.1903373206 0.8126779326                                                                                                                                                                                                                                                                                                                                                                                                        | 1389.38 1405.42 1423.32<br>1432.14 1487.96 1493.25<br>1501.88 1503.58 3031.33<br>3057.94 3059.59 3063.71<br>3109.12 3109.99 3135.51<br>3140.17 3174.63 3839.48<br>! Torsions 149.51 237.64<br>463.45 !                                                                                                                                                                                                                                                     |
| OH +<br>Tetrahydrofurfuryl<br>alcohol<br>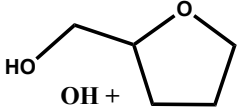 | O 0.0000 0.0000 -0.0057106914<br>H 0.0000 0.0000 0.9657106914<br><br>C -0.0564289428 0.0272043052 0.0252307586<br>H -0.192675142 0.0649189491 1.1107763046<br>H 1.0109997989 0.0036635767 -0.1903642779<br>C -0.8259303424 -1.1433282038 -0.5737195824<br>C -2.2081345103 -0.5233847959 -0.7608395769<br>C -1.8633943207 0.8987153906 -1.1915680994<br>C -2.8625407584 1.9549526268 -0.7538146093<br>O -2.9519373538 2.0176595743 0.6516450064<br>O -0.6133780559 1.2009300009 -0.5621582771<br>H -0.3996870358 -1.4207747323 -1.5386158554<br>H -0.8228400675 -2.0199768011 0.0703441174<br>H -2.8223816779 -1.0380703766 -1.496535529<br>H -2.745538138 -0.4908919395 0.1879961633<br>H -1.731501943 0.9529695445 -2.2778426197<br>H -2.5692133962 2.9237312792 -1.1702595823<br>H -3.8544665165 1.7067927215 -1.133130579<br>H -2.0525147347 2.1517731618 0.9689553957 | 3776.00<br><br>58.66 222.25 286.83 322.3<br>567.07 650.0 676.6 845.49<br>881.67 901.7 925.51 951.41<br>1005.39 1009.95 1060.53<br>1111.57 1159.29 1160.29<br>1209.27 1213.89 1243.72<br>1274.48 1309.75 1339.76<br>1359.59 1369.64 1400.97<br>1416.98 1431.87 1490.16<br>1503.46 1511.31 1539.65<br>3028.33 3035.5 3045.39<br>3080.02 3086.42 3111.76<br>3114.48 3141.46 3149.0<br>3848.78<br>! Torsions 144.94 448.18 !                                   |
| N-pentanol ROO2 =<br>QOOH-0                                                                                                | O -0.0300528101 0.0179732736 0.0196678131<br>O -0.0080238851 0.0120186465 1.3948522282<br>C 1.3105872798 -0.0010822117 1.8161339122<br>C 1.3592659703 -0.21891761 3.3089866684<br>C 0.968877213 -1.6395796858 3.7073103684<br>C 1.0200001518 -1.8374863836 5.2161561577<br>C 1.8990007186 1.446798684 1.4027798995<br>O 1.639856837 1.6694308078 0.1086264874<br>H 2.0230802479 -1.6485431191 5.6011405136<br>H 0.7414257035 -2.853450852 5.4914479098<br>H 0.3359610501 -1.154038132 5.720503938<br>H 1.6400305964 -2.3476349288 3.2159477843<br>H -0.0344864522 -1.8486952499 3.3339883485<br>H 0.6922857311 0.501900695 3.7876197458<br>H 2.3720957187 0.0014128931 3.6543077055<br>H 1.8779020534 -0.7357231884 1.2409804653<br>H 1.4336845996 2.1675557456 2.0861163552<br>H 2.9729179724 1.3377204285 1.6085715919<br>H 0.6457263452 0.8516511955 -0.1831678824     | 1186.70i 118.38 188.92<br>295.2 313.89 348.6<br>466.71 513.1 588.52<br>685.15 739.08 751.46<br>858.21 898.12 918.72<br>971.8 1006.91 1068.34<br>1100.9 1121.07 1165.66<br>1185.16 1226.15 1243.39<br>1253.94 1289.19 1306.51<br>1329.26 1337.16 1386.1<br>1414.7 1417.73 1478.11<br>1498.23 1504.46 1513.0<br>1516.04 1844.49 2979.09<br>3046.13 3057.92 3060.77<br>3068.12 3086.63 3096.93<br>3114.24 3132.11 3141.48<br>!78.52 85.92 246.48<br>!Torsions |
| N-pentanol ROO2 =<br>QOOH-1                                                                                                | O 0.0097096129 -0.0102553878 -0.0038213484<br>C -0.0007070226 0.0007679089 1.4204965433<br>C 1.3833501906 0.0071814328 2.0410717112<br>C 2.2291002313 1.1806976214 1.5635951761<br>C 3.6093630442 1.1884158521 2.2066318384                                                                                                                                                                                                                                                                                                                                                                                                                                                                                                                                                                                                                                               | 2056.98i 126.95 170.15<br>266.84 311.48 354.09<br>377.25 593.57 647.11<br>735.19 780.35 878.81<br>908.55 933.69 952.85                                                                                                                                                                                                                                                                                                                                     |

|                                                      |              |               |               |               |                  |            |         |
|------------------------------------------------------|--------------|---------------|---------------|---------------|------------------|------------|---------|
|                                                      | O            | 0.4631965622  | -1.292492079  | -0.3192005205 | 1005.33          | 1030.98    | 1071.18 |
|                                                      | C            | -0.7646300983 | -1.2947414749 | 1.720292136   | 1105.56          | 1131.03    | 1165.21 |
|                                                      | O            | -2.1063822278 | -1.2555174546 | 1.4817017457  | 1184.14          | 1228.92    | 1243.01 |
|                                                      | H            | 3.5353404983  | 1.2624047107  | 3.2926489146  | 1273.34          | 1323.22    | 1332.91 |
|                                                      | H            | 4.2077131806  | 2.0272606147  | 1.8538845312  | 1343.97          | 1383.97    | 1413.81 |
|                                                      | H            | 4.1495393761  | 0.270180202   | 1.9726835417  | 1416.54          | 1445.73    | 1478.7  |
|                                                      | H            | 1.7089013287  | 2.1158655777  | 1.7871662058  | 1498.1           | 1505.18    | 1513.07 |
|                                                      | H            | 2.3195319873  | 1.1264638161  | 0.4780976359  | 1761.28          | 3053.04    | 3058.14 |
|                                                      | H            | 1.8856941567  | -0.9324107036 | 1.8014941068  | 3061.23          | 3074.0     | 3097.25 |
|                                                      | H            | 1.268028888   | 0.0447851625  | 3.1280051429  | 3111.56          | 3130.73    | 3138.12 |
|                                                      | H            | -0.5704491729 | 0.8904428828  | 1.702832153   | 3166.46          | 3803.61    |         |
|                                                      | H            | -0.1454065011 | -1.8313045032 | 0.702234314   | ! 63.45          | 82.12      | 241.64  |
|                                                      | H            | -0.5573760335 | -1.8103719642 | 2.6531232772  | 523.53           | !Torsions  |         |
|                                                      | H            | -2.2533649448 | -0.7529521974 | 0.6694129022  |                  |            |         |
| N-pentanol ROO2 =<br>QOOH-4                          | C            | 0.0022110592  | -0.0028992745 | 0.0016432789  | 1821.49 <i>i</i> | 96.83      | 154.29  |
|                                                      | C            | -0.0025362459 | 0.0029780678  | 1.5065240836  | 203.91           | 311.59     | 393.04  |
|                                                      | C            | 1.3394977424  | 0.00312671    | 2.1907096722  | 398.33           | 488.97     | 494.52  |
|                                                      | C            | 1.9032385083  | 1.4287655358  | 2.3303569211  | 626.08           | 678.1      | 789.82  |
|                                                      | O            | 0.9136498094  | 2.2316976279  | 2.952838763   | 870.23           | 891.53     | 929.82  |
|                                                      | O            | -0.1475907237 | 2.3860640952  | 2.0797120288  | 932.94           | 1013.63    | 1052.48 |
|                                                      | C            | 3.1184340779  | 1.5052528271  | 3.2371213726  | 1098.68          | 1118.68    | 1134.04 |
|                                                      | O            | 2.8512636541  | 1.0172726612  | 4.5324837828  | 1142.31          | 1153.78    | 1206.45 |
|                                                      | H            | 0.6507133088  | 0.7831749888  | -0.3884275497 | 1251.17          | 1253.39    | 1290.18 |
|                                                      | H            | -0.9955532161 | 0.1481125437  | -0.4069472567 | 1352.74          | 1368.18    | 1368.99 |
|                                                      | H            | 0.3775312634  | -0.9584373847 | -0.3772076637 | 1402.48          | 1412.61    | 1431.21 |
|                                                      | H            | -0.3935958091 | 1.2329044893  | 1.8260619244  | 1473.51          | 1490.02    | 1494.61 |
|                                                      | H            | -0.7537129263 | -0.6348842271 | 1.9649527535  | 1505.06          | 1574.28    | 3036.3  |
|                                                      | H            | 1.277534526   | -0.4212847664 | 3.1908665865  | 3040.57          | 3048.67    | 3063.15 |
|                                                      | H            | 2.0629139314  | -0.5850193264 | 1.6153236835  | 3104.44          | 3121.77    | 3130.65 |
|                                                      | H            | 2.1353097354  | 1.8544348994  | 1.3495247508  | 3139.25          | 3149.02    | 3863.74 |
| H                                                    | 3.9140816144 | 0.8871468865  | 2.8218817743  | ! 108.86      | 194.79           | 304.53 !   |         |
| H                                                    | 3.4690467481 | 2.5409020143  | 3.268846955   |               |                  |            |         |
| H                                                    | 2.1228459686 | 1.5307716043  | 4.8949471171  |               |                  |            |         |
| N-pentanol ROO2 =<br>QOOH-5                          | C            | 0.0005194676  | -0.0140854838 | -0.001284831  | 1900.84 <i>i</i> | 70.74      | 188.02  |
|                                                      | C            | 0.0013888028  | -0.0166519051 | 1.504237436   | 262.22           | 289.01     | 298.07  |
|                                                      | C            | 1.4275278925  | 0.0016265151  | 2.0739240855  | 375.05           | 452.67     | 475.51  |
|                                                      | C            | 2.0453831301  | 1.4050946894  | 2.0943997798  | 529.03           | 605.6      | 634.5   |
|                                                      | O            | 1.4693605264  | 2.2484306038  | 1.0937510486  | 836.24           | 838.01     | 876.91  |
|                                                      | O            | 1.7518321747  | 1.7393374517  | -0.1597159688 | 892.52           | 996.46     | 1033.68 |
|                                                      | C            | 1.760790443   | 2.144067407   | 3.3893515245  | 1055.44          | 1086.41    | 1119.6  |
|                                                      | O            | 2.3164178269  | 3.4359095808  | 3.397308783   | 1124.26          | 1130.31    | 1150.29 |
|                                                      | H            | 0.9003154023  | 0.9396474943  | -0.2978377896 | 1170.81          | 1246.27    | 1250.57 |
|                                                      | H            | -0.9085828105 | 0.3142780682  | -0.495434338  | 1271.05          | 1336.23    | 1352.03 |
|                                                      | H            | 0.4561629815  | -0.8860780573 | -0.4651394361 | 1378.96          | 1388.09    | 1399.95 |
|                                                      | H            | -0.5646149816 | 0.8356041544  | 1.8812570679  | 1447.71          | 1456.71    | 1479.41 |
|                                                      | H            | -0.5148464415 | -0.9147937813 | 1.8575449431  | 1494.99          | 1501.54    | 1507.41 |
|                                                      | H            | 1.4295956173  | -0.3847504056 | 3.0947312092  | 3019.35          | 3039.93    | 3070.93 |
|                                                      | H            | 2.0514607489  | -0.6697600676 | 1.4829764272  | 3080.92          | 3101.77    | 3108.67 |
|                                                      | H            | 3.1235707653  | 1.3691468594  | 1.9246995135  | 3116.4           | 3120.81    | 3197.52 |
| H                                                    | 0.6762978223 | 2.1716807193  | 3.5552526196  | 3864.7        |                  |            |         |
| H                                                    | 2.2133828012 | 1.5941552361  | 4.2139184184  | !!141.25      | 393.95           | ! Torsions |         |
| H                                                    | 2.0421828511 | 3.8758609478  | 2.5868675086  |               |                  |            |         |
| N-pentanol ROO2 =<br>HO <sub>2</sub> + 1-Penten-1-ol | O            | 0.0471378659  | 0.0108086336  | -0.008837734  | 1155.31 <i>i</i> | 92.12      | 160.14  |
|                                                      | C            | 0.0343129125  | 0.0210812779  | 1.39238747    | 258.11           | 274.05     | 323.96  |
|                                                      | C            | 1.2636934305  | -0.0268638273 | 2.0282056557  | 396.93           | 521.36     | 542.84  |
|                                                      | C            | 1.4713253167  | 0.5055199582  | 3.4062470457  | 573.32           | 696.36     | 783.94  |

|                                                      |              |               |               |               |                              |           |         |
|------------------------------------------------------|--------------|---------------|---------------|---------------|------------------------------|-----------|---------|
|                                                      | C            | 2.0500358125  | 1.9284588956  | 3.3809055944  | 863.65                       | 896.92    | 958.39  |
|                                                      | C            | 1.1309911723  | 2.9494840471  | 2.7217365412  | 993.42                       | 1018.3    | 1065.57 |
|                                                      | O            | 1.2552403627  | -2.0571270422 | 2.5521545345  | 1098.89                      | 1143.07   | 1172.82 |
|                                                      | O            | 0.0760900121  | -2.3709204981 | 2.2530873492  | 1217.69                      | 1245.64   | 1279.57 |
|                                                      | H            | 0.9804078468  | 2.7293099635  | 1.6650214446  | 1291.57                      | 1314.14   | 1340.38 |
|                                                      | H            | 1.545691252   | 3.9535989552  | 2.7991277496  | 1370.59                      | 1378.26   | 1406.15 |
|                                                      | H            | 0.1507732127  | 2.9544242126  | 3.2024339927  | 1421.21                      | 1491.1    | 1496.26 |
|                                                      | H            | 3.0134806326  | 1.9107985762  | 2.8665603124  | 1506.1                       | 1510.12   | 1609.64 |
|                                                      | H            | 2.25390145    | 2.226625678   | 4.4103003941  | 1658.94                      | 3057.16   | 3059.15 |
|                                                      | H            | 2.1507030185  | -0.1515428692 | 3.9494265274  | 3064.16                      | 3099.85   | 3110.88 |
|                                                      | H            | 0.5186384764  | 0.5071579786  | 3.942797345   | 3113.93                      | 3129.31   | 3140.99 |
|                                                      | H            | 2.1417724999  | -0.1840059079 | 1.4125117367  | 3193.43                      | 3890.91   |         |
|                                                      | H            | -0.2692507123 | -1.2171665819 | 1.8075094902  | ! 58.65                      | 123.16    | 206.96  |
|                                                      | H            | -0.747214914  | 0.6291318727  | 1.8476782313  | 242.37                       | !Torsions |         |
|                                                      | H            | -0.6803976402 | -0.5252123448 | -0.3309306495 |                              |           |         |
| N-pentanol ROO3 =<br>HO <sub>2</sub> + 2-Penten-1-ol | C            | 0.0033335461  | -0.0065120178 | 0.0027735939  | 1074.87 <i>i</i>             | 113.79    | 140.23  |
|                                                      | C            | 0.0007687337  | -0.0005236896 | 1.5289815609  | 197.16                       | 250.68    | 310.91  |
|                                                      | C            | 1.4045464121  | 0.0026241782  | 2.1054848143  | 397.24                       | 460.41    | 558.2   |
|                                                      | C            | 2.1038943983  | 1.1913356013  | 2.2417845759  | 673.02                       | 706.33    | 782.09  |
|                                                      | O            | 1.3292973124  | 0.3465529574  | 4.6267815428  | 871.18                       | 902.4     | 946.74  |
|                                                      | O            | 1.9285204369  | 1.4131649622  | 4.3308672814  | 976.46                       | 1043.05   | 1056.19 |
|                                                      | C            | 3.5992249222  | 1.2696733597  | 2.2852627991  | 1101.83                      | 1129.49   | 1163.59 |
|                                                      | O            | 4.1956991796  | 0.1030656124  | 2.7989167684  | 1208.46                      | 1253.1    | 1278.59 |
|                                                      | H            | 0.4989888227  | 0.8849589104  | -0.3839031259 | 1292.84                      | 1334.32   | 1370.0  |
|                                                      | H            | -1.0097559411 | -0.0342347064 | -0.3976557916 | 1393.16                      | 1397.2    | 1411.33 |
|                                                      | H            | 0.541471054   | -0.8753511654 | -0.3778037385 | 1422.78                      | 1491.78   | 1496.59 |
|                                                      | H            | -0.5362983908 | 0.8770388388  | 1.8965306189  | 1501.68                      | 1508.64   | 1597.49 |
|                                                      | H            | -0.5456398981 | -0.8710189159 | 1.8950528119  | 1632.67                      | 3045.27   | 3056.91 |
|                                                      | H            | 1.2338683482  | -0.109543793  | 3.4174999232  | 3061.4                       | 3083.1    | 3094.53 |
|                                                      | H            | 2.0130051279  | -0.8785581607 | 1.9133205222  | 3129.57                      | 3134.55   | 3140.26 |
|                                                      | H            | 1.5910727442  | 2.1333897149  | 2.0730554073  | 3169.33                      | 3861.26   |         |
|                                                      | H            | 3.9695791808  | 1.3840759641  | 1.262687988   | !69.44                       | 89.11     | 263.54  |
| H                                                    | 3.9041067309 | 2.158147244   | 2.8451862651  | 365.85        | !Torsions                    |           |         |
| H                                                    | 3.9561213362 | 0.0337501259  | 3.7282912241  |               |                              |           |         |
| QOOH-0 = OH + CH <sub>2</sub> O<br>+ butanal         | O            | -0.0443797021 | -0.3926062991 | -0.1142452292 | 103.62 <i>i</i>              | 97.76     | 200.19  |
|                                                      | C            | -0.2469597048 | -0.1983767976 | 1.074026377   | 297.05                       | 316.49    | 330.17  |
|                                                      | O            | 2.6559666625  | 0.0482556937  | -0.172224231  | 395.45                       | 561.31    | 585.75  |
|                                                      | O            | 2.5626495329  | -0.2246943962 | 1.2128091259  | 743.98                       | 808.94    | 858.66  |
|                                                      | C            | 1.768738449   | 0.6882618443  | 1.8121665973  | 907.24                       | 998.44    | 1054.76 |
|                                                      | C            | 1.7844174903  | 0.5918270572  | 3.2950395372  | 1069.1                       | 1109.41   | 1125.65 |
|                                                      | C            | 3.0652136209  | 1.1634803726  | 3.9206659842  | 1168.35                      | 1237.24   | 1254.94 |
|                                                      | C            | 3.0549780321  | 1.038311601   | 5.4379010434  | 1274.43                      | 1304.31   | 1332.95 |
|                                                      | H            | 2.2076892416  | 1.5743784948  | 5.8678550596  | 1376.07                      | 1412.35   | 1416.04 |
|                                                      | H            | 3.9656231349  | 1.4456588568  | 5.8745993752  | 1472.65                      | 1495.47   | 1497.5  |
|                                                      | H            | 2.9760047171  | -0.0065464981 | 5.7405496217  | 1504.33                      | 1509.45   | 1511.49 |
|                                                      | H            | 3.16708973    | 2.2109858275  | 3.6304695116  | 1706.66                      | 2959.02   | 3033.69 |
|                                                      | H            | 3.9226433337  | 0.6356755061  | 3.5015106219  | 3050.87                      | 3059.42   | 3070.6  |
|                                                      | H            | 1.6803479792  | -0.4572212588 | 3.5848888031  | 3090.97                      | 3110.78   | 3132.43 |
|                                                      | H            | 0.9152271781  | 1.125422949   | 3.6875472063  | 3139.16                      | 3177.41   | 3622.98 |
|                                                      | H            | 1.6983569363  | 1.639866669   | 1.2973937701  | ! Torsions 63.88 68.92 82.55 |           |         |
|                                                      | H            | -0.0692336521 | -0.9846885469 | 1.823199785   | 227.0                        | 245.28    | 533.27! |
| H                                                    | -0.808520522 | 0.682226695   | 1.4233875653  |               |                              |           |         |
| H                                                    | 1.801361895  | -0.3056213973 | -0.4876939253 |               |                              |           |         |
| QOOH-0 = QOOH-4                                      | C            | -0.0020345799 | -0.000506947  | 0.0002193437  | 1484.46 <i>i</i>             | 88.89     | 127.94  |
|                                                      | C            | -0.0002254167 | -0.0008535282 | 1.5100886662  | 182.82                       | 266.32    | 348.92  |

|                                          |                                                                                                                                                                                                                                                                                                                                                                                                                                                                                                                                                                                                                                                                                                                                                                                                                                                                                  |                                                                                                                                                                                                                                                                                                                                                                                                                                                             |
|------------------------------------------|----------------------------------------------------------------------------------------------------------------------------------------------------------------------------------------------------------------------------------------------------------------------------------------------------------------------------------------------------------------------------------------------------------------------------------------------------------------------------------------------------------------------------------------------------------------------------------------------------------------------------------------------------------------------------------------------------------------------------------------------------------------------------------------------------------------------------------------------------------------------------------|-------------------------------------------------------------------------------------------------------------------------------------------------------------------------------------------------------------------------------------------------------------------------------------------------------------------------------------------------------------------------------------------------------------------------------------------------------------|
|                                          | C 1.3615869993 0.0004476247 2.1727195989<br>C 1.9122246021 1.4223945812 2.2251108915<br>C 0.8848743855 2.3256844925 2.9115420494<br>O -0.3018258768 2.3444442048 2.188493212<br>O 3.1189280661 1.3545071706 2.9577881314<br>O 3.7212771448 2.6430952759 2.9161803643<br>H 0.6158158603 0.8064191736 -0.3935399528<br>H -1.0084303104 0.1237822553 -0.3958821374<br>H 0.3955279335 -0.9446631421 -0.3819549382<br>H -0.4531704475 1.1074950541 1.848494137<br>H -0.6931642205 -0.7202998674 1.9415176115<br>H 1.3004170103 -0.3700050044 3.1969949236<br>H 2.0614906869 -0.6391500535 1.6277895594<br>H 2.1120631883 1.8045927054 1.219199555<br>H 0.750498711 1.9844234936 3.9461520695<br>H 1.276037767 3.3480253274 2.9308126206<br>H 4.499917514 2.4699782245 2.3742022889                                                                                                    | 411.93 471.83 488.14<br>544.3 656.52 839.33<br>871.01 900.12 926.85<br>1008.06 1025.2 1051.65<br>1105.19 1114.18 1138.15<br>1163.48 1177.73 1194.9<br>1229.66 1279.85 1305.38<br>1324.63 1357.83 1378.51<br>1390.59 1412.27 1413.42<br>1480.87 1489.39 1496.44<br>1498.03 1562.59 3006.71<br>3047.71 3052.31 3054.25<br>3069.94 3109.31 3115.45<br>3126.92 3147.88 3837.09<br>! Torsions 151.44 193.9 208.6<br>!                                            |
| QOOH-1 = OH + 3-propyloxiran-2-ol        | C 0.0001567803 0.0073470956 -0.0005065549<br>C 0.0001725882 -0.0106348476 1.5225878171<br>C 1.4106964654 -0.0050276438 2.0970137448<br>C 1.4243301045 -0.021373086 3.6095777247<br>C 1.149598752 -1.3099517728 4.2512436027<br>H 1.433467402 -2.2453497569 3.7947930025<br>O 0.6507186016 -1.4262424035 5.4757236225<br>O 2.6848910236 -0.098364501 4.1909943879<br>O 3.4850562718 1.3876789591 3.8236324853<br>H 0.5111204561 0.8947964672 -0.3753982186<br>H -1.0126023353 0.0072857781 -0.4012683944<br>H 0.5190690167 -0.865766362 -0.3980803533<br>H -0.5463139808 0.8575574887 1.8997521757<br>H -0.5375856348 -0.893212053 1.8806853859<br>H 1.9740440746 -0.8715010769 1.73827258<br>H 1.9566895248 0.8841648634 1.7798157808<br>H 0.8250248985 0.8004842849 4.0260644805<br>H 0.465172604 -0.5524525546 5.8400809311<br>H 4.3182023967 0.9621550676 3.5891307995        | 859.66i 111.24 120.04<br>205.36 250.53 278.48<br>350.6 404.48 512.54<br>549.68 724.4 750.87<br>865.31 922.72 967.42<br>985.52 1043.68 1084.61<br>1124.88 1150.57 1172.91<br>1237.86 1251.28 1281.12<br>1301.06 1326.94 1352.84<br>1387.62 1415.56 1415.74<br>1492.3 1499.85 1504.25<br>1513.82 1538.68 3000.82<br>3044.53 3057.49 3061.75<br>3078.36 3119.8 3130.4<br>3138.01 3250.98 3834.59<br>3858.45<br>! Torsions 74.17 81.28<br>163.17 249.63 442.07! |
| QOOH-1 = HO <sub>2</sub> + 1-Penten-1-ol | C -0.0122406607 -0.0133914825 0.0042082766<br>C 0.0003956143 0.0043585191 1.5274505416<br>C 1.4132068428 0.0097453805 2.1179724401<br>C 2.181807216 -1.2367387549 1.8093449092<br>C 3.1710065666 -1.2575422589 0.8703251019<br>H 3.5605267391 -0.3602494623 0.4087250731<br>O 3.8532627362 -2.3638459577 0.5283341702<br>O 3.2456405495 -1.3978465328 3.4590639292<br>O 3.9511287182 -2.5828620587 3.344827416<br>H 0.5386825515 0.8400726467 -0.3957109945<br>H -1.0290899172 0.0327118489 -0.3836892114<br>H 0.4552940873 -0.9180533185 -0.3851477873<br>H -0.5283289714 0.8878498487 1.888433637<br>H -0.5440042171 -0.8608786303 1.9134281583<br>H 1.9651954396 0.8767318346 1.7463951444<br>H 1.3563536544 0.1076274249 3.2036264924<br>H 1.7076334369 -2.1794764527 2.0629224037<br>H 3.6062977895 -3.0750393561 1.1346505786<br>H 4.8469187846 -2.2891822423 3.1352026978 | 481.93i 165.73 253.02<br>261.58 318.9 358.39<br>456.0 544.6 580.86<br>783.53 832.64 866.62<br>901.81 968.07 1004.02<br>1032.56 1077.6 1100.62<br>1158.07 1178.76 1237.43<br>1288.51 1299.53 1323.03<br>1362.59 1377.03 1395.88<br>1414.29 1423.21 1486.32<br>1493.8 1503.09 1508.91<br>1626.83 3055.9 3057.64<br>3060.96 3095.86 3104.08<br>3126.36 3137.8 3163.54<br>3218.65 3799.2 3801.48<br>! Torsions 39.43 89.83 111.42<br>170.25 279.57 422.65!      |

|                                                    |                                                                                                                                                                                                                                                                                                                                                                                                                                                                                                                                                                                                                                                                                                                                                                                                                                                                                                                                                   |                                                                                                                                                                                                                                                                                                                                                                                                                                                                                                        |
|----------------------------------------------------|---------------------------------------------------------------------------------------------------------------------------------------------------------------------------------------------------------------------------------------------------------------------------------------------------------------------------------------------------------------------------------------------------------------------------------------------------------------------------------------------------------------------------------------------------------------------------------------------------------------------------------------------------------------------------------------------------------------------------------------------------------------------------------------------------------------------------------------------------------------------------------------------------------------------------------------------------|--------------------------------------------------------------------------------------------------------------------------------------------------------------------------------------------------------------------------------------------------------------------------------------------------------------------------------------------------------------------------------------------------------------------------------------------------------------------------------------------------------|
| <p>QOOH-4 = OH + (4-methyl-2-oxetanyl)methanol</p> | <p>C 0.0070084561 -0.0005111943 0.0010446917<br/> C -0.0001476523 0.0011600122 1.4829083891<br/> H 0.9490547731 0.0019168864 2.0002837288<br/> C -1.2242928975 0.4188711671 2.2445549557<br/> C -1.6979670507 -0.9513426241 2.7313624067<br/> C -3.1206688128 -1.3015474324 2.3221341075<br/> O -3.2206235898 -1.4127840178 0.9210127202<br/> O -0.7414272817 -1.7621662287 2.0137086641<br/> O -1.3347585763 -3.2815523834 2.2830366733<br/> H 0.7591032343 -0.6838367532 -0.3921363233<br/> H 0.2329253683 0.999018423 -0.3890027763<br/> H -0.9737649988 -0.2914474293 -0.3761109583<br/> H -1.0124600128 1.1066639002 3.0615231248<br/> H -1.961335987 0.8667490504 1.5774830058<br/> H -1.5638317928 -1.1022827148 3.8044652395<br/> H -3.4395090007 -2.2211146404 2.8138715597<br/> H -3.7822472883 -0.4918979464 2.6357904355<br/> H -2.6457187893 -2.1493635323 0.6809706775<br/> H -0.4909191045 -3.7319695337 2.1697576929</p>          | <p>1025.53i 50.36 133.27<br/> 220.92 298.27 306.02<br/> 362.44 399.2 434.57<br/> 581.73 673.12 736.75<br/> 837.73 913.0 919.03<br/> 951.76 1005.24 1040.66<br/> 1059.6 1109.35 1148.65<br/> 1157.5 1165.52 1222.23<br/> 1242.49 1287.39 1327.82<br/> 1375.18 1386.23 1405.15<br/> 1422.76 1429.59 1480.73<br/> 1485.53 1493.69 1509.74<br/> 3021.16 3067.32 3077.4<br/> 3081.52 3098.03 3116.02<br/> 3134.66 3140.84 3201.98<br/> 3830.28 3874.37<br/> ! Torsions 103.03 175.37<br/> 232.79 489.0!</p> |
| <p>QOOH-5 = QOOH-0</p>                             | <p>C -0.0250682387 -0.0124211015 -0.0000273162<br/> H -0.0409016835 -0.0054985072 1.085497627<br/> H 0.977412806 0.0265168594 -0.4205436561<br/> C -1.0489811918 0.831937371 -0.7121652156<br/> C -1.295817943 0.3369798433 -2.1437092094<br/> C -2.2916562573 -0.8215234623 -2.2040584656<br/> C -2.1676954503 -1.6632907717 -3.4657381562<br/> O -0.8581715047 -2.11715957 -3.7199586289<br/> O -2.2329297547 -1.6400484445 -1.0271495181<br/> O -0.9524995778 -2.1476802871 -0.8685478999<br/> H -1.9851083399 0.8398118517 -0.1523795862<br/> H -0.6915784156 1.8659768039 -0.7422394705<br/> H -1.6914551005 1.1416511085 -2.7640113642<br/> H -0.3518951258 0.0256846623 -2.5928257165<br/> H -3.3130458351 -0.4366067187 -2.1451631509<br/> H -2.870919669 -2.4989005131 -3.3882481582<br/> H -2.4599389917 -1.0540211941 -4.323159953<br/> H -0.538042099 -2.5348890403 -2.913200093<br/> H -0.3920876071 -1.2583333538 -0.3240738401</p> | <p>1906.39i 79.69 227.26<br/> 233.44 292.93 327.01<br/> 391.88 401.77 471.41<br/> 565.66 619.02 717.02<br/> 771.03 850.0 890.36<br/> 933.7 966.0 999.01<br/> 1041.38 1054.64 1098.74<br/> 1122.31 1145.29 1167.81<br/> 1176.48 1245.98 1256.47<br/> 1266.05 1318.95 1356.45<br/> 1379.82 1389.15 1411.12<br/> 1443.67 1456.26 1478.71<br/> 1489.9 1500.07 1503.4<br/> 3038.59 3040.36 3076.82<br/> 3080.4 3098.73 3101.24<br/> 3109.29 3125.2 3197.7<br/> 3840.55<br/> ! 145.46 458.79 Torsions !</p>  |
| <p>QOOH-5 = OH + Tetrahydrofurfuryl alcohol</p>    | <p>C -0.0538662377 0.115948198 0.0297842229<br/> H -0.0999017012 0.0994042181 1.1089262602<br/> H 0.9293033347 0.0734119897 -0.412191341<br/> C -1.2545766281 -0.3029433459 -0.7357691443<br/> C -2.3383530549 0.728858961 -0.4413449669<br/> C -1.7773793365 2.114477367 -0.7314525958<br/> C -2.6411652629 3.1985097468 -0.0850204552<br/> O -2.4834776418 3.2065119936 1.3125308266<br/> O -0.4492083849 2.1391513868 -0.1893301452<br/> O -0.0799537377 3.7428419432 -0.246575029<br/> H -1.0363942608 -0.3278675957 -1.8041389697<br/> H -1.5904063282 -1.3030284693 -0.4440974927<br/> H -3.2391163534 0.5656036937 -1.0346757133<br/> H -2.6128300198 0.6904020155 0.614940729<br/> H -1.7147252736 2.2888650017 -1.8108600802<br/> H -2.4024141617 4.170363066 -0.5164963229<br/> H -3.6889848859 2.9761500143 -0.2936490028</p>                                                                                                          | <p>988.09i 57.07 153.36<br/> 252.73 276.59 311.59<br/> 348.84 406.67 489.78<br/> 525.07 564.92 694.77<br/> 798.3 823.8 887.95<br/> 896.69 936.26 979.44<br/> 1012.87 1064.81 1090.71<br/> 1121.02 1145.37 1171.05<br/> 1212.16 1239.76 1268.47<br/> 1324.76 1354.51 1358.96<br/> 1386.66 1414.55 1433.66<br/> 1473.93 1483.75 1500.69<br/> 1519.27 3038.75 3040.11<br/> 3068.77 3077.57 3099.69<br/> 3119.54 3122.75 3173.65<br/> 3276.32 3839.36 3871.06<br/> ! Torsions 137.76 238.79</p>            |



H -1.5581899477 3.428641911 1.4677958838  
H 0.8744332442 3.610826148 -0.2514234184

473.17!

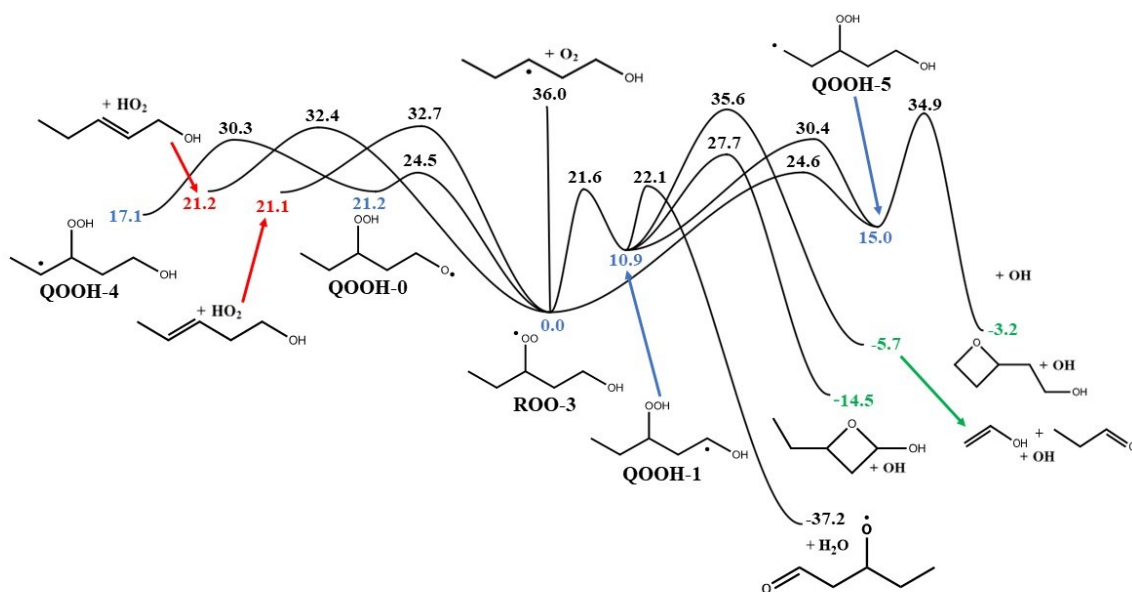

**Figure S8.** Potential energy surface for n-Pentanol ROO3 calculated at CCSD(T)/cc-pV $\infty$ Z//M06-2X/cc-pVTZ level of theory. Energies are given in kcal/mol. QOOH energies are given in blue, HO<sub>2</sub> producing routes in red, OH producing rates in green.

**Table S13.** Calculated relative energies for n-Pentanol ROO3 PES

| Species                                                                               | Relative energy (kcal/mol) |
|---------------------------------------------------------------------------------------|----------------------------|
| N-pentanol ROO3                                                                       | 0.0                        |
| QOOH-0                                                                                | 21.2                       |
| QOOH-1                                                                                | 10.9                       |
| QOOH-4                                                                                | 17.1                       |
| QOOH-5                                                                                | 15.0                       |
| HO <sub>2</sub> + 2-Penten-1-ol                                                       | 21.2                       |
| HO <sub>2</sub> + 3-Penten-1-ol                                                       | 21.1                       |
| O <sub>2</sub> + CH <sub>3</sub> CH <sub>2</sub> CHCH <sub>2</sub> CH <sub>2</sub> OH | 36.0                       |
| OH + 4-ethyloxetan-2-ol                                                               | -14.5                      |
| OH + Vinyl Alcohol + Propanal                                                         | -5.7                       |
| H <sub>2</sub> O + 3-hydroxy-pentanal radical                                         | -37.2                      |
| OH + 2-Oxetaneethanol                                                                 | -3.2                       |
| N-pentanol ROO3 = QOOH-0                                                              | 24.5                       |

|                                                        |      |
|--------------------------------------------------------|------|
| N-pentanol ROO3 = QOOH-1                               | 21.6 |
| N-pentanol ROO3 = QOOH-5                               | 24.6 |
| N-pentanol ROO3 = HO <sub>2</sub> + 2-Penten-1-ol      | 32.4 |
| N-pentanol ROO3 = HO <sub>2</sub> + 3-Penten-1-ol      | 32.7 |
| QOOH-0 = QOOH-4                                        | 30.3 |
| QOOH-1 = OH + 4-ethyloxetan-2-ol                       | 27.7 |
| QOOH-1 = OH + Vinyl Alcohol + Propanal                 | 35.6 |
| QOOH-1 = QOOH-5                                        | 30.4 |
| QOOH-1 = H <sub>2</sub> O + 3-hydroxy-pentanal radical | 22.1 |
| QOOH-5 = OH + 2-Oxetaneethanol                         | 34.9 |

**Table S14.** Optimized geometries and frequencies (m062x/cc-pVTZ) of relevant stationary points on the calculated n-Pentanol ROO3 PES

| Species                                                                                                    | Geometry   |            |            |            | Frequencies (cm <sup>-1</sup> ) |         |         |
|------------------------------------------------------------------------------------------------------------|------------|------------|------------|------------|---------------------------------|---------|---------|
| 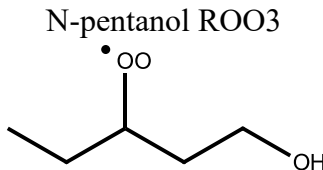 <p>N-pentanol ROO3</p> | C          | -0.0008115 | -0.0006878 | 0.00179856 | 266.98                          | 324.17  | 383.59  |
|                                                                                                            | C          | 0.00080367 | 0.00361901 | 1.51723721 | 456.44                          | 501.04  | 519.59  |
|                                                                                                            | C          | 1.39167295 | 0.02245808 | 2.12776093 | 585.86                          | 765.21  | 798.53  |
|                                                                                                            | C          | 1.39483503 | 0.15182536 | 3.64745537 | 913.44                          | 927.25  | 952.90  |
|                                                                                                            | O          | 0.59923357 | -0.8352066 | 4.26882821 | 1030.95                         | 1061.13 | 1105.77 |
|                                                                                                            | H          | 0.64355172 | -0.8185407 | -0.3248117 | 1122.37                         | 1144.09 | 1172.52 |
|                                                                                                            | H          | 1.87250198 | -0.9171501 | 1.84767801 | 1221.46                         | 1253.51 | 1303.40 |
|                                                                                                            | H          | 1.97121312 | 0.83754444 | 1.68680353 | 1313.81                         | 1321.95 | 1372.55 |
|                                                                                                            | H          | 2.41214659 | 0.01740666 | 4.01384168 | 1387.48                         | 1412.20 | 1413.09 |
|                                                                                                            | H          | -0.3144394 | -0.5364937 | 4.21569285 | 1420.41                         | 1425.62 | 1466.04 |
|                                                                                                            | H          | -0.5804286 | -0.8290469 | 1.91533509 | 1482.91                         | 1505.13 | 1511.52 |
|                                                                                                            | H          | 0.46570699 | 0.92476714 | -0.3436748 | 1524.46                         | 3058.72 | 3060.82 |
|                                                                                                            | C          | -1.3960835 | -0.1509304 | -0.5896113 | 3066.03                         | 3069.79 | 3097.93 |
|                                                                                                            | H          | -1.3625609 | -0.1414646 | -1.6776289 | 3104.51                         | 3113.44 | 3120.19 |
|                                                                                                            | H          | -1.8503952 | -1.0911091 | -0.275097  | 3140.08                         | 3149.10 | 3853.21 |
|                                                                                                            | H          | -2.0447397 | 0.66131638 | -0.2643588 | ! 83.98                         | 114.22  | 122.11  |
|                                                                                                            | O          | -0.7150142 | 1.21068974 | 1.91478696 | 168.07                          | 211.76  | 238.69  |
| O                                                                                                          | -1.2949757 | 1.09200825 | 3.06838012 | !Torsions  |                                 |         |         |
| H                                                                                                          | 1.07166004 | 1.15432898 | 3.93985891 |            |                                 |         |         |
|  <p>QOOH-0</p>          | O          | -0.0140267 | 0.0272476  | -0.0120434 | 248.01                          | 259.48  | 314.98  |
|                                                                                                            | C          | -0.0062348 | -0.0009675 | 1.35365691 | 367.74                          | 490.78  | 523.82  |
|                                                                                                            | C          | 1.38849443 | -0.0141578 | 1.96812687 | 601.40                          | 679.45  | 786.74  |
|                                                                                                            | C          | 2.14586513 | 1.26734955 | 1.66460033 | 849.92                          | 895.07  | 945.62  |
|                                                                                                            | C          | 3.63613011 | 1.19985733 | 1.96782445 | 992.35                          | 1021.68 | 1055.69 |
|                                                                                                            | C          | 3.95067258 | 0.80665054 | 3.40661622 | 1089.18                         | 1098.55 | 1109.03 |
|                                                                                                            | H          | 3.42433758 | 1.45352254 | 4.1094881  | 1158.86                         | 1195.09 | 1253.86 |
|                                                                                                            | H          | 5.01780853 | 0.88616669 | 3.60776397 | 1292.34                         | 1322.50 | 1358.77 |
|                                                                                                            | H          | 3.65149019 | -0.2206431 | 3.61471378 | 1374.94                         | 1383.64 | 1397.04 |
|                                                                                                            | H          | 4.07061975 | 2.17396919 | 1.73783822 | 1398.38                         | 1418.81 | 1430.01 |
|                                                                                                            | H          | 4.0891354  | 0.49069198 | 1.27195545 | 1469.21                         | 1493.42 | 1504.58 |
|                                                                                                            | H          | 1.99417329 | 1.53256136 | 0.61497168 | 1514.29                         | 2945.49 | 3007.89 |
|                                                                                                            | H          | 1.94825214 | -0.8630983 | 1.57159625 | 3064.00                         | 3067.18 | 3073.28 |
|                                                                                                            | H          | 1.3098582  | -0.1455889 | 3.04933296 | 3077.97                         | 3104.05 | 3119.82 |
|                                                                                                            | H          | -0.6326743 | -0.8266728 | 1.71752726 | 3135.25                         | 3140.52 | 3834.45 |

|                                                                                                   |            |            |            |            |           |           |               |
|---------------------------------------------------------------------------------------------------|------------|------------|------------|------------|-----------|-----------|---------------|
|                                                                                                   | H          | -0.534372  | 0.92007043 | 1.65988511 | !66.28    | 78.97     | 114.64        |
|                                                                                                   | O          | 1.48889627 | 2.25213753 | 2.46459451 | 152.29    | 213.44    | 220.79        |
|                                                                                                   | O          | 1.88876567 | 3.53415922 | 2.00181977 | !Torsions |           |               |
|                                                                                                   | H          | 2.43645463 | 3.84470943 | 2.73239753 |           |           |               |
| 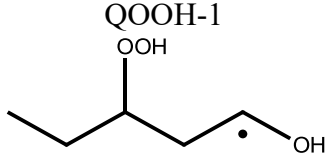 <p>QOOH-1</p>   | O          | 0.4797866  | 0.56887088 | -0.0921436 | 250.24    | 291.28    | 350.32        |
|                                                                                                   | C          | 0.10152967 | 0.02837029 | 1.1091012  | 395.10    | 435.41    | 515.40        |
|                                                                                                   | C          | 1.19674953 | -0.1377885 | 2.09190607 | 540.97    | 700.91    | 764.42        |
|                                                                                                   | C          | 2.03636471 | -1.4111172 | 1.91051054 | 839.76    | 898.04    | 952.26        |
|                                                                                                   | C          | 2.66092891 | -1.549782  | 0.53226159 | 988.65    | 1044.66   | 1060.24       |
|                                                                                                   | C          | 3.64099927 | -2.7124161 | 0.44200994 | 1088.81   | 1111.04   | 1189.32       |
|                                                                                                   | H          | 4.45724202 | -2.589319  | 1.1557182  | 1212.46   | 1224.94   | 1279.96       |
|                                                                                                   | H          | 4.07696408 | -2.7807005 | -0.5537667 | 1309.08   | 1313.19   | 1350.99       |
|                                                                                                   | H          | 3.14314754 | -3.6561814 | 0.65899446 | 1375.05   | 1404.76   | 1413.20       |
|                                                                                                   | H          | 3.1574609  | -0.6070947 | 0.29654004 | 1415.62   | 1455.16   | 1474.35       |
|                                                                                                   | H          | 1.85909771 | -1.6646393 | -0.1985618 | 1483.81   | 1503.49   | 1512.80       |
|                                                                                                   | H          | 2.81984886 | -1.4319987 | 2.67793844 | 3020.07   | 3063.21   | 3067.30       |
|                                                                                                   | H          | 0.77712719 | -0.1616211 | 3.09789138 | 3077.95   | 3113.84   | 3122.56       |
|                                                                                                   | H          | 1.86580643 | 0.72423552 | 2.0298553  | 3134.05   | 3147.09   | 3184.68       |
|                                                                                                   | H          | -0.2683817 | 0.57285845 | -0.6932314 | 3834.47   | 3898.52   |               |
|                                                                                                   | H          | -0.7475638 | -0.6432935 | 1.10450696 | ! 50.64   | 98.2584   | 113.6531      |
|                                                                                                   | O          | 1.22998404 | -2.5755052 | 2.06903841 | 132.9152  | 189.3343  |               |
| O                                                                                                 | 0.76508123 | -2.6149421 | 3.4121852  | 212.3903   | 232.5440  | !Torsions |               |
| H                                                                                                 | 1.2931449  | -3.3361367 | 3.77396182 |            |           |           |               |
|  <p>QOOH-4</p> | C          | -0.0039635 | 0.00461944 | -0.0027947 | 95.37     | 150.85    | 253.65        |
|                                                                                                   | C          | 0.0102238  | 0.00254397 | 1.48043157 | 334.27    | 386.29    | 488.27        |
|                                                                                                   | C          | 1.13856753 | -0.0179562 | -2.2418599 | 545.40    | 599.29    | 658.07        |
|                                                                                                   | C          | 2.48245385 | -0.0666749 | -2.9567762 | 799.53    | 906.31    | 943.00        |
|                                                                                                   | O          | 3.23011158 | 1.14056719 | -2.7969077 | 975.93    | 995.61    | 1015.68       |
|                                                                                                   | H          | 2.34386641 | -0.270485  | -4.0203846 | 1051.92   | 1075.50   | 1114.19       |
|                                                                                                   | H          | 3.10615222 | -0.8574931 | -2.5415688 | 1135.22   | 1161.15   | 1205.59       |
|                                                                                                   | H          | 0.69976326 | 0.9739516  | -2.3760224 | 1264.90   | 1289.25   | 1352.51       |
|                                                                                                   | H          | 0.44931778 | -0.7334157 | -2.6950687 | 1371.19   | 1391.27   | 1402.14       |
|                                                                                                   | H          | 1.45929677 | -1.4113848 | -0.6372335 | 1420.21   | 1428.83   | 1474.12       |
|                                                                                                   | C          | 1.23268444 | -0.3409975 | -0.7505806 | 1474.67   | 1484.40   | 1489.86       |
|                                                                                                   | O          | 2.39563823 | 0.22523966 | -0.143944  | 1509.55   | 2992.18   | 3023.87       |
|                                                                                                   | O          | 2.29399157 | 1.64191539 | -0.210753  | 3060.01   | 3066.94   | 3078.80       |
|                                                                                                   | H          | 2.79924815 | 1.80303491 | -1.0254763 | 3107.74   | 3126.01   | 3137.73       |
|                                                                                                   | H          | 2.89308183 | 1.78869578 | -3.4199789 | 3206.85   | 3696.30   | 3887.21       |
|                                                                                                   | H          | 0.53314382 | 0.88653379 | 1.86265144 | ! 50.86   | 129.09    | 194.07 212.59 |
|                                                                                                   | H          | -0.8531943 | 0.3981206  | -0.5432567 | 277.13    | 321.00    | !Torsions     |
| H                                                                                                 | -0.9958883 | -0.0006997 | 1.89592252 |            |           |           |               |
| H                                                                                                 | 0.55388089 | -0.8630476 | 1.86674643 |            |           |           |               |
|  <p>QOOH-5</p> | O          | 0.00359539 | -0.0169837 | -0.0044402 | 320.75    | 340.94    | 362.33        |
|                                                                                                   | C          | 0.00751494 | 0.00223526 | 1.40500645 | 465.85    | 482.65    | 498.84        |
|                                                                                                   | C          | 1.41115326 | -0.0030191 | 1.99928379 | 532.69    | 596.07    | 805.39        |
|                                                                                                   | C          | 2.07819503 | -1.3677983 | 1.95060032 | 853.85    | 926.88    | 938.37        |
|                                                                                                   | C          | 3.48319907 | -1.364002  | 2.54448713 | 965.50    | 1013.29   | 1070.22       |
|                                                                                                   | C          | 4.22853411 | -2.6229153 | 2.28740856 | 1074.14   | 1114.38   | 1136.60       |
|                                                                                                   | O          | 2.07125122 | -1.9160869 | 0.62837706 | 1163.97   | 1204.17   | 1241.89       |
|                                                                                                   | O          | 2.95391913 | -1.1506631 | -0.1837103 | 1269.21   | 1303.95   | 1369.19       |
|                                                                                                   | H          | 3.7466101  | -1.7055444 | -0.1732688 | 1394.81   | 1396.82   | 1407.16       |
|                                                                                                   | H          | 5.28907262 | -2.6790292 | 2.47896357 | 1411.34   | 1440.61   | 1461.20       |
|                                                                                                   | H          | 3.69754453 | -3.5416344 | 2.08626873 | 1467.59   | 1472.08   | 1519.68       |
|                                                                                                   | H          | 3.38303349 | -1.1801407 | 3.62255669 | 3003.61   | 3006.16   | 3056.11       |
|                                                                                                   | H          | 4.03735433 | -0.5060100 | 2.15447793 | 3063.83   | 3073.75   | 3109.07       |

|                                                                                                                                                                                      |   |            |            |            |           |           |           |
|--------------------------------------------------------------------------------------------------------------------------------------------------------------------------------------|---|------------|------------|------------|-----------|-----------|-----------|
|                                                                                                                                                                                      | H | 1.4591668  | -2.0988185 | 2.48103212 | 3114.90   | 3172.56   | 3277.33   |
|                                                                                                                                                                                      | H | 1.36873748 | 0.31105734 | 3.04537694 | 3782.03   | 3861.85   |           |
|                                                                                                                                                                                      | H | 2.0248874  | 0.72142127 | 1.46022784 | ! 50.2920 | 115.3722  |           |
|                                                                                                                                                                                      | H | -0.5673068 | -0.8399642 | 1.81296411 | 133.6292  | 171.4489  |           |
|                                                                                                                                                                                      | H | -0.5091441 | 0.91658415 | 1.69488106 | 179.1650  | 211.1462  |           |
|                                                                                                                                                                                      | H | 0.52817396 | -0.7710673 | -0.290611  | 287.2927  | !Torsions |           |
| $\text{HO}_2 + 2\text{-Penten-1-ol} + \text{HO}_2$ 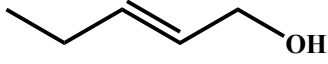                                                 | O | 0.50553254 | 2.59512924 | 1.64024162 | 1161.48   | 1475.38   | 3553.10   |
|                                                                                                                                                                                      | O | -0.1679742 | 2.44348437 | 0.50783059 |           |           |           |
|                                                                                                                                                                                      | H | -0.2367003 | 1.48037439 | 0.35008979 |           |           |           |
|                                                                                                                                                                                      | O | -0.000519  | -0.0065331 | 0.00055603 | 186.84    | 211.96    | 263.32    |
|                                                                                                                                                                                      | C | -0.000325  | 0.0021708  | 1.41000729 | 511.73    | 666.54    | 717.51    |
|                                                                                                                                                                                      | C | 1.36752406 | 0.0054969  | 2.02862908 | 834.34    | 897.61    | 952.18    |
|                                                                                                                                                                                      | C | 2.49830442 | -0.1306882 | 1.35124778 | 1009.01   | 1028.98   | 1050.91   |
|                                                                                                                                                                                      | C | 3.88213291 | -0.1264388 | 1.93148228 | 1112.86   | 1117.79   | 1158.51   |
|                                                                                                                                                                                      | C | 3.95085596 | 0.05489942 | 3.43977648 | 1218.88   | 1294.18   | 1299.47   |
|                                                                                                                                                                                      | H | 3.50308669 | 1.00214471 | 3.74206539 | 1339.65   | 1379.45   | 1383.16   |
|                                                                                                                                                                                      | H | 4.98437523 | 0.04757593 | 3.78232763 | 1416.67   | 1422.59   | 1481.87   |
|                                                                                                                                                                                      | H | 3.42017156 | -0.7459438 | 3.95551955 | 1503.34   | 1506.78   | 1512.30   |
|                                                                                                                                                                                      | H | 4.46145392 | 0.66011685 | 1.43908344 | 1767.83   | 3015.22   | 3044.94   |
|                                                                                                                                                                                      | H | 4.37403529 | -1.0620802 | 1.65020816 | 3063.49   | 3067.58   | 3083.51   |
|                                                                                                                                                                                      | H | 2.43683489 | -0.2763714 | 0.27700455 | 3130.49   | 3140.36   | 3166.05   |
|                                                                                                                                                                                      | H | 1.38431859 | 0.13218972 | 3.10648502 | 3174.59   | 3869.89   |           |
|                                                                                                                                                                                      | H | -0.540868  | -0.895914  | 1.71667489 | ! 82.75   | 231.01    | 301.73    |
|                                                                                                                                                                                      | H | -0.5712518 | 0.8550729  | 1.79663322 | 359.59    | !Torsions |           |
|                                                                                                                                                                                      | H | 0.46723818 | 0.77699436 | -0.3009978 |           |           |           |
| $\text{HO}_2 + 3\text{-Penten-1-ol} + \text{HO}_2$                                                | O | 0.50553254 | 2.59512924 | 1.64024162 | 1161.48   | 1475.38   | 3553.10   |
|                                                                                                                                                                                      | O | -0.1679742 | 2.44348437 | 0.50783059 |           |           |           |
|                                                                                                                                                                                      | H | -0.2367003 | 1.48037439 | 0.35008979 |           |           |           |
|                                                                                                                                                                                      | C | 0.30741342 | 0.53663611 | 0.31779885 | 212.22    | 305.22    | 404.48    |
|                                                                                                                                                                                      | C | 0.11748188 | -0.2747225 | 1.56168933 | 487.97    | 585.71    | 736.62    |
|                                                                                                                                                                                      | C | 1.06960779 | -0.8340096 | 2.29993048 | 813.19    | 914.17    | 1006.86   |
|                                                                                                                                                                                      | C | 2.54829385 | -0.7549825 | 2.05604885 | 1025.31   | 1038.79   | 1052.87   |
|                                                                                                                                                                                      | C | 3.17925167 | 0.36835798 | 2.86244458 | 1072.29   | 1112.21   | 1160.14   |
|                                                                                                                                                                                      | O | 4.57819267 | 0.32537583 | 2.64856422 | 1233.77   | 1238.47   | 1291.00   |
|                                                                                                                                                                                      | H | -0.1404099 | 1.52489465 | 0.43670741 | 1319.37   | 1325.18   | 1402.26   |
|                                                                                                                                                                                      | H | -0.1914926 | 0.06548623 | -0.5312159 | 1441.33   | 1454.06   | 1487.48   |
|                                                                                                                                                                                      | H | 1.35635719 | 0.67217956 | 0.06445755 | 1490.90   | 1512.54   | 1534.21   |
|                                                                                                                                                                                      | H | -0.9115007 | -0.4093642 | 1.87881797 | 1759.41   | 3015.82   | 3049.79   |
|                                                                                                                                                                                      | H | 0.76532983 | -1.3789717 | 3.18759787 | 3059.11   | 3080.81   | 3108.21   |
|                                                                                                                                                                                      | H | 3.02779919 | -1.690201  | 2.34904747 | 3126.12   | 3151.02   | 3160.00   |
|                                                                                                                                                                                      | H | 2.77763966 | -0.5958202 | 1.00303124 | 3180.40   | 3900.10   |           |
|                                                                                                                                                                                      | H | 2.75657684 | 1.32554537 | 2.5376014  | ! 28.3354 | 111.1528  |           |
|                                                                                                                                                                                      | H | 2.9376226  | 0.24020201 | 3.92346677 | 137.1140  | 268.8076  | !Torsions |
|                                                                                                                                                                                      | H | 4.99400023 | 1.02664967 | 3.15358488 |           |           |           |
| $\text{O}_2 + \text{CH}_3\text{CH}_2\dot{\text{C}}\text{HCH}_2\text{CH}_2\text{OH} + \text{O}_2$  | O | 0.0000000  | 0.0000000  | 0.00794919 | 1758.25   |           |           |
|                                                                                                                                                                                      | O | 0.0000000  | 0.0000000  | 1.19781253 |           |           |           |
|                                                                                                                                                                                      | C | 0.0105688  | 0.00707752 | -0.0032427 | 238.12    | 303.93    | 407.60    |
|                                                                                                                                                                                      | C | 0.01645146 | -0.0160225 | 1.48786038 | 432.01    | 539.75    | 772.27    |
|                                                                                                                                                                                      | H | 1.03661934 | -0.0577798 | 1.87005522 | 821.14    | 880.02    | 928.67    |
|                                                                                                                                                                                      | H | -0.4500800 | 0.89547021 | 1.88158779 | 1024.13   | 1040.12   | 1063.37   |
|                                                                                                                                                                                      | C | -0.7522976 | -1.2174856 | 2.04745852 | 1104.68   | 1127.69   | 1172.27   |
|                                                                                                                                                                                      | H | -0.7453851 | -1.1917241 | 3.13637166 | 1195.38   | 1243.50   | 1272.95   |

|  |   |              |            |              |            |            |            |
|--|---|--------------|------------|--------------|------------|------------|------------|
|  | H | -1.7971446   | -1.1725427 | 1.71874708   | 1320.92    | 1346.91    | 1380.95    |
|  | O | -0.1609198   | -2.4442397 | 1.67538546   | 1413.04    | 1416.06    | 1434.40    |
|  | H | -0.0679867   | -2.4425472 | 0.71768904   | 1470.99    | 1477.28    | 1501.93    |
|  | C | -1.1802979   | 0.48461104 | -0.7581735   | 1507.42    | 1521.75    | 2982.64    |
|  | H | -2.0917918   | 0.21802457 | -0.2144502   | 3016.46    | 3024.76    | 3054.25    |
|  | H | -1.1757695   | 1.58375251 | -0.7908957   | 3061.23    | 3107.50    | 3119.48    |
|  | C | -1.2437534   | -0.057132  | -2.1828845   | 3128.21    | 3139.76    | 3189.45    |
|  | H | -2.1070157   | 0.33281431 | -2.7203273   | 3848.64    |            |            |
|  | H | -1.3086446   | -1.145612  | -2.1782739   | ! 40.21    | 65.77      | 153.14     |
|  | H | -0.3473115   | 0.21990777 | -2.7387395   | 242.56     | 357.57     | ! Torsions |
|  | H | 0.93310565   | -0.1446784 | -0.5484748   |            |            |            |
|  | O | 0.00000000   | 0.00000000 | -0.00571069  | 3776.00    |            |            |
|  | H | 0.00000000   | 0.00000000 | 0.96571069   |            |            |            |
|  | O | 0.34346164   | -0.2561859 | 0.34660115   | 58.32      | 184.39     | 353.97     |
|  | C | -0.0790514   | 0.01090735 | 1.64663722   | 414.38     | 471.37     | 567.93     |
|  | H | 0.77500421   | 0.12743212 | 2.31805924   | 751.62     | 798.63     | 846.59     |
|  | C | -1.1612041   | 1.08515517 | 1.65024272   | 931.74     | 960.66     | 992.52     |
|  | C | -2.1056542   | -0.0755866 | 1.99844696   | 1004.91    | 1042.82    | 1059.41    |
|  | O | -0.9778608   | -0.9713651 | 2.15142669   | 1117.93    | 1147.44    | 1172.91    |
|  | C | -2.9226474   | 0.02105638 | 3.26232865   | 1207.41    | 1242.39    | 1262.68    |
|  | C | -3.5594424   | -1.3147545 | 3.62334215   | 1284.44    | 1314.89    | 1336.08    |
|  | H | 0.87916496   | -1.0547976 | 0.35768183   | 1382.31    | 1412.82    | 1418.43    |
|  | H | -1.0624719   | 1.81887219 | 2.44660243   | 1449.47    | 1478.28    | 1491.82    |
|  | H | -1.3036969   | 1.57181538 | 0.69078423   | 1502.57    | 1511.82    | 3051.64    |
|  | H | -2.7289109   | -0.3997974 | 1.16052208   | 3057.02    | 3064.83    | 3066.73    |
|  | H | -2.268393    | 0.3587361  | 4.06971465   | 3095.10    | 3117.16    | 3134.36    |
|  | H | -3.687823    | 0.78890837 | 3.12070759   | 3145.84    | 3184.47    | 3868.84    |
|  | H | -2.7901735   | -2.0780768 | 3.73462733   | ! 116.7807 | 237.2156   |            |
|  | H | -4.1169919   | -1.2505213 | 4.55650614   | 291.4149   | ! Torsions |            |
|  | H | -4.2466826   | -1.640844  | 2.8415018    |            |            |            |
|  | O | 0.00000000   | 0.00000000 | -0.00571069  | 3776.00    |            |            |
|  | H | 0.00000000   | 0.00000000 | 0.96571069   |            |            |            |
|  | C | 0.00108637   | 0.00000000 | 0.00545105   | 498.84     | 728.26     | 861.80     |
|  | C | -0.00237744  | 0.00000000 | 1.329579641  | 972.01     | 1017.42    | 1140.88    |
|  | H | 0.922217046  | 0.00000000 | -0.563562232 | 1334.37    | 1359.87    | 1452.26    |
|  | H | -0.931617023 | 0.00000000 | -0.535007759 | 1739.13    | 3176.70    | 3216.02    |
|  | H | -0.916296910 | 0.00000000 | 1.908645540  | 3281.22    | 3861.17    | ! 449.99   |
|  | O | 1.082393644  | 0.00000000 | 2.142130840  | ! Torsions |            |            |
|  | H | 1.881163785  | 0.00000000 | 1.605445553  |            |            |            |
|  | C | -0.0088334   | 0.00308834 | 0.00021537   | 266.82     | 673.44     | 677.86     |
|  | C | -0.0031765   | 0.0007975  | 1.48572907   | 873.63     | 908.86     | 1008.52    |
|  | C | 1.4220078    | -0.0026989 | 2.02869628   | 1121.87    | 1156.86    | 1283.93    |
|  | O | -1.2572665   | -0.1552681 | -0.5283629   | 1372.83    | 1414.21    | 1430.39    |
|  | O | -1.1755897   | -0.1115346 | -1.9431467   | 1457.55    | 1497.45    | 1504.73    |
|  | H | -0.5449389   | 0.8748294  | 1.86892114   | 1866.92    | 2945.02    | 3050.32    |
|  | H | -0.5497278   | -0.8754972 | 1.84187402   | 3077.74    | 3081.28    | 3153.86    |
|  | H | 1.42405644   | 0.00808997 | 3.117032     | 3156.87    | ! 148.66   | 238.11     |
|  | H | 1.96099697   | -0.8880251 | 1.6929931    | ! Torsions |            |            |
|  | H | 1.96977516   | 0.87446604 | 1.6833002    |            |            |            |
|  | H | -1.0570379   | -1.0450961 | -2.1614852   |            |            |            |
|  | H | 0.65665443   | 0.63494383 | -0.5771534   |            |            |            |

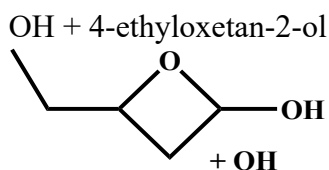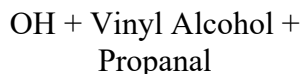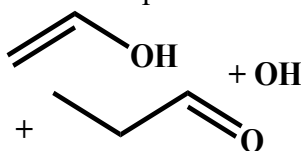

|                                                                                                                                                              |                                                                                                                              |               |               |               |             |          |               |
|--------------------------------------------------------------------------------------------------------------------------------------------------------------|------------------------------------------------------------------------------------------------------------------------------|---------------|---------------|---------------|-------------|----------|---------------|
| <p>H<sub>2</sub>O + 3-hydroxy-pentanal radical</p> 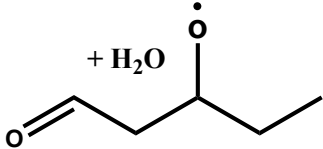 <p>+ H<sub>2</sub>O</p> | O                                                                                                                            | 0.00000000    | 0.00000000    | 0.00000000    | 1627.56     | 3874.01  | 3976.38       |
|                                                                                                                                                              | H                                                                                                                            | 0.00000000    | 0.00000000    | 0.95889274    |             |          |               |
|                                                                                                                                                              | H                                                                                                                            | 0.9268960684  | 0.00000000    | -0.2456399095 |             |          |               |
|                                                                                                                                                              | C                                                                                                                            | -0.0070795451 | -0.0058596137 | 0.0018583396  | 234.1       | 252.17   | 344.87        |
|                                                                                                                                                              | C                                                                                                                            | 0.004421028   | 0.0038721129  | 1.5330767205  | 427.58      | 459.61   | 690.96        |
|                                                                                                                                                              | H                                                                                                                            | 1.0317303898  | -0.0161474754 | -0.337816993  | 716.39      | 777.48   | 866.18        |
|                                                                                                                                                              | H                                                                                                                            | -0.4687883252 | -0.9379835638 | -0.3265022671 | 911.91      | 978.78   | 1007.21       |
|                                                                                                                                                              | C                                                                                                                            | 0.5558053965  | -1.2851413647 | 2.1411282838  | 1045.62     | 1066.41  | 1103.2        |
|                                                                                                                                                              | H                                                                                                                            | -1.0463285361 | 0.1066076096  | 1.8708704255  | 1155.65     | 1194.38  | 1223.59       |
|                                                                                                                                                              | C                                                                                                                            | -0.4013562567 | -2.44050143   | 2.0586164848  | 1253.01     | 1307.89  | 1350.73       |
|                                                                                                                                                              | H                                                                                                                            | 1.4951955209  | -1.5756605354 | 1.6606483305  | 1357.34     | 1413.72  | 1423.55       |
|                                                                                                                                                              | H                                                                                                                            | 0.7932358778  | -1.1259100079 | 3.1970271152  | 1445.27     | 1484.05  | 1500.97       |
|                                                                                                                                                              | H                                                                                                                            | -0.0155032507 | -3.4080525301 | 2.4296815842  | 1510.34     | 1854.81  | 2910.47       |
|                                                                                                                                                              | O                                                                                                                            | -1.5240278967 | -2.3557629196 | 1.6407887908  | 2961.0      | 3056.14  | 3060.85       |
|                                                                                                                                                              | O                                                                                                                            | 0.6145304852  | 1.1145294398  | 2.0464595789  | 3067.78     | 3093.5   | 3111.98       |
|                                                                                                                                                              | C                                                                                                                            | -0.7454084911 | 1.1912909571  | -0.5748102452 | 3137.6      | 3150.15  |               |
|                                                                                                                                                              | H                                                                                                                            | -0.319774325  | 2.1195951269  | -0.1970529326 | ! 79.39     | 89.83    | 153.9 187.2 ! |
|                                                                                                                                                              | H                                                                                                                            | -0.6864169098 | 1.2037482596  | -1.6619074721 | Torsions    |          |               |
|                                                                                                                                                              | H                                                                                                                            | -1.7995951717 | 1.1629489196  | -0.2961397423 |             |          |               |
|                                                                                                                                                              | <p>OH + 2-Oxetaneethanol</p>  <p>+ OH</p> | O             | 0.00000000    | 0.00000000    | -0.00571069 | 3776.00  |               |
| H                                                                                                                                                            |                                                                                                                              | 0.00000000    | 0.00000000    | 0.96571069    |             |          |               |
| C                                                                                                                                                            |                                                                                                                              | -0.0536885    | 0.03510669    | 0.03780999    | 31.31       | 233.15   | 410.15        |
| C                                                                                                                                                            |                                                                                                                              | -0.0498954    | -0.0279208    | 1.57330041    | 501.00      | 522.11   | 760.07        |
| C                                                                                                                                                            |                                                                                                                              | 1.29694893    | -0.0250411    | 2.26191506    | 789.47      | 861.35   | 889.91        |
| C                                                                                                                                                            |                                                                                                                              | 1.21221735    | -0.5355606    | 3.69589186    | 941.96      | 982.37   | 997.06        |
| O                                                                                                                                                            |                                                                                                                              | 0.99919762    | -1.9280406    | 3.75850064    | 1025.21     | 1076.70  | 1119.80       |
| C                                                                                                                                                            |                                                                                                                              | -0.6109167    | -1.3929804    | 0.11727113    | 1133.41     | 1162.52  | 1186.09       |
| H                                                                                                                                                            |                                                                                                                              | 0.05744707    | -2.1770422    | -0.2396784    | 1221.16     | 1232.15  | 1257.47       |
| H                                                                                                                                                            |                                                                                                                              | -1.6045266    | -1.5426175    | -0.3039401    | 1265.38     | 1305.02  | 1343.51       |
| O                                                                                                                                                            |                                                                                                                              | -0.6513672    | -1.3473654    | 1.55421569    | 1375.48     | 1396.73  | 1416.65       |
| H                                                                                                                                                            |                                                                                                                              | 0.2911173     | -2.1400398    | 3.13912561    | 1457.59     | 1469.97  | 1496.44       |
| H                                                                                                                                                            |                                                                                                                              | 0.4224639     | 0.00913643    | 4.2304461     | 1525.08     | 1541.20  | 3002.53       |
| H                                                                                                                                                            |                                                                                                                              | 2.14953223    | -0.3407717    | 4.21655223    | 3051.20     | 3060.81  | 3073.20       |
| H                                                                                                                                                            |                                                                                                                              | 1.68485772    | 0.9971578     | 2.25047504    | 3102.58     | 3106.07  | 3114.95       |
| H                                                                                                                                                            |                                                                                                                              | 1.99549461    | -0.6565004    | 1.70625687    | 3119.86     | 3172.96  | 3816.76       |
| H                                                                                                                                                            |                                                                                                                              | -0.7261897    | 0.67645752    | 2.06413726    | ! 79.5697   | 187.8029 | 349.9802      |
| H                                                                                                                                                            |                                                                                                                              | -0.7322995    | 0.76622328    | -0.3908789    | !Torsions   |          |               |
| H                                                                                                                                                            | 0.92901393                                                                                                                   | 0.13379559    | -0.4162295    |               |             |          |               |
| <p>N-pentanol ROO3 =<br/>QOOH-0</p>                                                                                                                          | C                                                                                                                            | -0.0116315    | -0.0489422    | 0.03655817    | 1846.94i    | 71.39    | 190.21        |
|                                                                                                                                                              | C                                                                                                                            | 0.01765543    | -0.013301     | 1.55924282    | 266.03      | 296.37   | 318.57        |
|                                                                                                                                                              | C                                                                                                                            | 1.42609122    | 0.00911691    | 2.12798354    | 385.92      | 438.48   | 482.88        |
|                                                                                                                                                              | C                                                                                                                            | 1.45577047    | 0.00819477    | 3.66061089    | 514.38      | 619.86   | 768.01        |
|                                                                                                                                                              | C                                                                                                                            | 1.52292571    | -1.4152297    | 4.24208774    | 835.76      | 861.44   | 908.54        |
|                                                                                                                                                              | O                                                                                                                            | 2.81486168    | -1.9180732    | 4.203102      | 969.64      | 977.54   | 1013.40       |
|                                                                                                                                                              | O                                                                                                                            | 2.04895339    | -1.1812752    | 1.62371829    | 1057.63     | 1070.59  | 1087.74       |
|                                                                                                                                                              | O                                                                                                                            | 3.35598846    | -1.2180259    | 2.06408002    | 1134.57     | 1181.27  | 1189.24       |
|                                                                                                                                                              | H                                                                                                                            | 0.52267232    | 0.80687953    | -0.378104     | 1205.08     | 1249.66  | 1306.36       |
|                                                                                                                                                              | H                                                                                                                            | -1.0356095    | -0.0170112    | -0.3323258    | 1335.26     | 1343.87  | 1375.22       |
|                                                                                                                                                              | H                                                                                                                            | 0.46098386    | -0.9529281    | -0.3413992    | 1379.75     | 1412.56  | 1417.28       |
|                                                                                                                                                              | H                                                                                                                            | -0.4948423    | 0.87803239    | 1.92544366    | 1469.12     | 1476.01  | 1482.81       |
|                                                                                                                                                              | H                                                                                                                            | -0.5116661    | -0.8763484    | 1.97190124    | 1501.57     | 1511.84  | 1644.72       |

|                                                      |            |            |            |            |            |          |           |
|------------------------------------------------------|------------|------------|------------|------------|------------|----------|-----------|
|                                                      | H          | 1.97860385 | 0.86510347 | 1.73129744 | 3003.04    | 3053.35  | 3060.63   |
|                                                      | H          | 2.31840226 | 0.55352776 | 4.039483   | 3063.54    | 3069.63  | 3089.56   |
|                                                      | H          | 0.55587241 | 0.5003723  | 4.0301266  | 3103.31    | 3137.19  | 3140.65   |
|                                                      | H          | 1.26362052 | -1.3640316 | 5.3073131  | 3156.88    |          |           |
|                                                      | H          | 0.81073088 | -2.0814293 | 3.74533951 | ! 110.4340 | 216.6845 | !Torsions |
|                                                      | H          | 3.2855579  | -1.7283796 | 3.01433195 |            |          |           |
| N-pentanol ROO3 =<br>QOOH-1                          | C          | 0.00193634 | 0.03372559 | 0.03445692 | 1914.25i   | 71.00    | 144.02    |
|                                                      | C          | 0.01093883 | -0.0395859 | 1.55569123 | 246.19     | 303.69   | 336.42    |
|                                                      | C          | 1.41326164 | -0.0313322 | 2.1316962  | 431.97     | 448.52   | 486.44    |
|                                                      | C          | 1.43062946 | -0.0246296 | 3.66368213 | 525.43     | 605.98   | 770.90    |
|                                                      | C          | 2.81946433 | -0.2273600 | 4.20391228 | 828.32     | 925.91   | 962.80    |
|                                                      | O          | 2.81333616 | -0.9399588 | 5.38574808 | 1009.73    | 1023.34  | 1061.69   |
|                                                      | O          | 2.04749423 | -1.2289558 | 1.70571    | 1099.91    | 1120.69  | 1137.49   |
|                                                      | O          | 3.39821646 | -1.1245169 | 1.98729967 | 1173.87    | 1195.33  | 1224.24   |
|                                                      | H          | 0.47455099 | 0.95372326 | -0.3116867 | 1258.84    | 1294.77  | 1311.26   |
|                                                      | H          | -1.0157404 | 0.01259685 | -0.3522175 | 1315.66    | 1346.75  | 1379.01   |
|                                                      | H          | 0.54859622 | -0.8052984 | -0.39201   | 1411.09    | 1416.70  | 1431.21   |
|                                                      | H          | -0.5342447 | 0.80415932 | 1.98302955 | 1468.69    | 1482.67  | 1502.04   |
|                                                      | H          | -0.4900754 | -0.9481538 | 1.89726873 | 1511.98    | 1599.78  | 3040.60   |
|                                                      | H          | 1.98957781 | 0.81363984 | 1.73902132 | 3052.99    | 3064.59  | 3065.82   |
|                                                      | H          | 1.00140258 | 0.91339367 | 4.0260701  | 3069.37    | 3104.00  | 3115.65   |
|                                                      | H          | 0.80736165 | -0.845719  | 4.02238637 | 3137.37    | 3153.97  | 3886.80   |
| H                                                    | 3.35219788 | -0.8774255 | 3.20070688 | !106.9532  | 208.5363   |          |           |
| H                                                    | 3.44532139 | 0.66877775 | 4.2283576  | 381.6076   | !Torsions  |          |           |
| H                                                    | 3.7024731  | -0.9775666 | 5.74699592 |            |            |          |           |
| N-pentanol ROO3 =<br>QOOH-5                          | C          | -0.0007219 | -0.0019987 | -0.0004187 | 1808.74i   | 132.18   | 149.31    |
|                                                      | C          | -0.002922  | -0.0075344 | 1.50032772 | 267.00     | 327.72   | 409.65    |
|                                                      | C          | 1.43173857 | 0.01209121 | 2.06288855 | 473.59     | 475.23   | 498.87    |
|                                                      | C          | 1.49205446 | -0.1928886 | 3.56378609 | 540.90     | 652.87   | 826.87    |
|                                                      | C          | 2.91426885 | -0.219923  | 4.11346179 | 837.33     | 890.90   | 931.84    |
|                                                      | O          | 3.57996782 | -1.4355403 | 3.86030193 | 997.06     | 1018.59  | 1066.50   |
|                                                      | O          | 2.13271632 | -1.0634942 | 1.44908677 | 1087.11    | 1108.57  | 1128.88   |
|                                                      | O          | 2.33620771 | -0.7507042 | 0.116092   | 1132.13    | 1154.16  | 1174.89   |
|                                                      | H          | 1.22718995 | -0.5195761 | -0.2271999 | 1226.71    | 1236.60  | 1272.33   |
|                                                      | H          | 0.09055526 | 0.96865388 | -0.4785344 | 1307.50    | 1351.52  | 1375.90   |
|                                                      | H          | -0.6882762 | -0.6740651 | -0.5013686 | 1396.02    | 1406.77  | 1442.59   |
|                                                      | H          | -0.5268338 | 0.86600406 | 1.8992283  | 1453.52    | 1465.05  | 1481.00   |
|                                                      | H          | -0.4949514 | -0.9008408 | 1.88453708 | 1520.02    | 1578.12  | 3011.73   |
|                                                      | H          | 1.93351778 | 0.94198646 | 1.77674803 | 3049.67    | 3051.88  | 3066.34   |
|                                                      | H          | 0.93267903 | 0.6220487  | 4.02840615 | 3111.59    | 3112.72  | 3119.97   |
|                                                      | H          | 0.99372428 | -1.1287601 | 3.82631758 | 3126.11    | 3215.23  | 3853.26   |
| H                                                    | 3.47798585 | 0.63217654 | 3.71272383 | ! 57.1545  | 196.1244   | 445.4986 |           |
| H                                                    | 2.88677191 | -0.1112662 | 5.19706794 | !Torsions  |            |          |           |
| H                                                    | 3.54717048 | -1.6018671 | 2.91295985 |            |            |          |           |
| N-pentanol ROO3 = HO <sub>2</sub><br>+ 2-Penten-1-ol | C          | 0.00434483 | 0.00452462 | -0.0018131 | 1069.47i   | 138.96   | 236.77    |
|                                                      | C          | -0.0043862 | -0.0115109 | 1.38514414 | 262.36     | 288.93   | 352.73    |
|                                                      | C          | 1.21446775 | -0.0092679 | 2.25094392 | 444.19     | 469.50   | 566.06    |
|                                                      | C          | 2.46235295 | -0.5953533 | 1.60484828 | 653.23     | 688.86   | 768.34    |
|                                                      | O          | -0.4314368 | -2.0669232 | 1.64366236 | 857.91     | 907.21   | 958.68    |
|                                                      | O          | -0.4220622 | -2.4619624 | 0.44599512 | 1015.06    | 1024.84  | 1069.80   |
|                                                      | H          | 2.27407269 | -1.6121905 | 1.25918531 | 1106.37    | 1122.33  | 1144.9256 |
|                                                      | H          | 3.28133263 | -0.6279886 | 2.32103328 | 1201.18    | 1269.52  | 1275.72   |
|                                                      | H          | 2.79358369 | -0.0019288 | 0.75342896 | 1306.96    | 1307.85  | 1378.55   |
|                                                      | H          | 0.98169862 | -0.545037  | 3.17221516 | 1386.45    | 1396.67  | 1420.53   |

|                                                      |            |            |            |            |           |           |           |
|------------------------------------------------------|------------|------------|------------|------------|-----------|-----------|-----------|
|                                                      | H          | 1.39698654 | 1.03030962 | 2.54527798 | 1421.07   | 1470.29   | 1505.00   |
|                                                      | H          | -0.9401928 | 0.22205717 | 1.87912661 | 1511.19   | 1530.08   | 1599.30   |
|                                                      | H          | -0.1380454 | -1.3241608 | -0.075326  | 1643.49   | 3039.79   | 3041.62   |
|                                                      | C          | -1.2240691 | 0.49732001 | -0.7552246 | 3071.12   | 3094.95   | 3101.14   |
|                                                      | O          | -2.4275025 | 0.11841712 | -0.1196277 | 3140.64   | 3147.50   | 3163.43   |
|                                                      | H          | 0.95604175 | 0.14416829 | -0.5058232 | 3192.75   | 3860.24   |           |
|                                                      | H          | -2.4759658 | -0.8421056 | -0.0958168 | ! 78.6100 | 88.0240   |           |
|                                                      | H          | -1.2422915 | 1.58675144 | -0.7946387 | 128.5818  | 217.3702  | !Torsions |
|                                                      | H          | -1.1925053 | 0.13553673 | -1.7873001 |           |           |           |
| N-pentanol ROO3 = HO <sub>2</sub><br>+ 3-Penten-1-ol | C          | 0.01127585 | -0.0260352 | 0.03150441 | 1071.03i  | 159.08    | 171.58    |
|                                                      | C          | -0.0235847 | -0.0016891 | 1.54826717 | 238.24    | 258.71    | 282.30    |
|                                                      | C          | 1.1334812  | 0.10584054 | 2.31376319 | 384.89    | 437.67    | 495.78    |
|                                                      | C          | 2.51855781 | 0.21819177 | 1.76996752 | 566.30    | 588.45    | 701.92    |
|                                                      | C          | 3.45374607 | 1.10852877 | 2.59286158 | 790.40    | 857.64    | 917.06    |
|                                                      | O          | 3.33135454 | 0.88373403 | 3.98147202 | 964.17    | 1004.17   | 1043.23   |
|                                                      | O          | 0.8841267  | 2.11611629 | 2.9481286  | 1070.05   | 1086.56   | 1117.69   |
|                                                      | O          | -0.2385099 | 2.37848285 | 2.44328441 | 1152.68   | 1201.61   | 1250.86   |
|                                                      | H          | 0.57359641 | 0.81628686 | -0.3706846 | 1283.67   | 1290.18   | 1333.16   |
|                                                      | H          | -0.9977079 | 0.03739747 | -0.3714854 | 1397.20   | 1403.63   | 1405.26   |
|                                                      | H          | 0.4646222  | -0.9428044 | -0.3487019 | 1423.16   | 1436.91   | 1463.86   |
|                                                      | H          | -0.4145767 | 1.21918199 | 1.87910464 | 1500.34   | 1505.54   | 1522.60   |
|                                                      | H          | -0.8302664 | -0.5666045 | 2.00695437 | 1585.76   | 1625.22   | 3031.40   |
|                                                      | H          | 1.08338864 | -0.1932758 | 3.35315    | 3062.98   | 3074.91   | 3117.09   |
|                                                      | H          | 2.91553379 | -0.8040345 | 1.76884802 | 3123.58   | 3126.69   | 3139.79   |
|                                                      | H          | 2.51279239 | 0.55616686 | 0.73377207 | 3152.03   | 3199.41   | 3876.32   |
| H                                                    | 4.48630062 | 0.88621155 | 2.32591979 | ! 76.4005  | 124.0313  |           |           |
| H                                                    | 3.26522336 | 2.15575238 | 2.3526202  | 132.9519   | 384.8940  | !Torsions |           |
| H                                                    | 2.59569104 | 1.41303626 | 4.30173614 |            |           |           |           |
| QOOH-0 = QOOH-4                                      | O          | 0.01144233 | 0.02382876 | -0.0190251 | 1462.55i  | 74.44     | 211.34    |
|                                                      | C          | -0.0059826 | 0.01428251 | 1.37418066 | 230.04    | 263.39    | 341.10    |
|                                                      | C          | 1.41000817 | 0.00229721 | 1.95369961 | 422.01    | 451.40    | 535.65    |
|                                                      | C          | 2.15553333 | -1.2173812 | 1.42164628 | 583.14    | 656.71    | 792.08    |
|                                                      | O          | 1.52922606 | -2.4321223 | 1.81301468 | 843.03    | 895.36    | 925.44    |
|                                                      | O          | 1.66598157 | -2.5500721 | 3.22287724 | 970.49    | 1014.36   | 1063.12   |
|                                                      | C          | 2.14562673 | -1.2037928 | -0.0897315 | 1069.78   | 1093.95   | 1103.49   |
|                                                      | C          | 2.31299146 | -2.5188727 | -0.8093802 | 1168.89   | 1176.23   | 1202.34   |
|                                                      | H          | -0.5111746 | 0.93289391 | 1.693089   | 1241.42   | 1296.04   | 1307.98   |
|                                                      | H          | -0.5727538 | -0.840589  | 1.76238905 | 1350.12   | 1360.34   | 1372.69   |
|                                                      | H          | 1.94160038 | 0.90086059 | 1.63557009 | 1387.27   | 1407.75   | 1412.28   |
|                                                      | H          | 1.38393125 | -0.009751  | 3.04265073 | 1476.46   | 1487.77   | 1495.25   |
|                                                      | H          | 3.18438962 | -1.2282009 | 1.80104936 | 1499.10   | 1577.18   | 3008.05   |
|                                                      | H          | 0.74576626 | -2.511284  | 3.50912077 | 3024.30   | 3047.25   | 3051.10   |
|                                                      | H          | 1.02631759 | -0.717244  | -0.3227852 | 3085.42   | 3116.68   | 3127.59   |
|                                                      | H          | 2.80607052 | -0.4187425 | -0.4561324 | 3136.36   | 3164.72   | 3834.44   |
| H                                                    | 1.52566112 | -3.2196705 | -0.5427792 | ! 123.0578 | 170.5756  |           |           |
| H                                                    | 2.30425991 | -2.3708856 | -1.8873278 | 204.5424   | !Torsions |           |           |
| H                                                    | 3.26685781 | -2.9790954 | -0.5366431 |            |           |           |           |
| QOOH-1 = OH + 4-<br>ethyloxetan-2-ol                 | O          | 0.02120162 | -0.0080163 | 0.01383048 | 985.06i   | 64.05     | 101.26    |
|                                                      | C          | 0.00808888 | -0.0157496 | 1.36063209 | 158.39    | 205.92    | 268.11    |
|                                                      | H          | 0.96388859 | -0.0259089 | 1.86721341 | 368.17    | 398.65    | 430.60    |
|                                                      | C          | -1.2168887 | 0.52485033 | 2.01466021 | 462.50    | 534.72    | 673.21    |
|                                                      | C          | -1.6207255 | -0.6939093 | 2.84621232 | 754.49    | 790.34    | 821.07    |
|                                                      | O          | -0.8038731 | -1.6747299 | 2.18029237 | 944.79    | 974.60    | 998.48    |
|                                                      | O          | -1.3787143 | -3.0621116 | 2.88253559 | 1007.84   | 1083.94   | 1098.11   |
|                                                      | C          | -1.2995499 | -0.6022271 | 4.32916327 | 1139.40   | 1148.55   | 1182.74   |



|                                                            |               |               |               |               |            |           |           |
|------------------------------------------------------------|---------------|---------------|---------------|---------------|------------|-----------|-----------|
|                                                            | C             | 0.17869229    | -0.3711751    | 4.61622528    | 1251.25    | 1275.28   | 1291.77   |
|                                                            | H             | 0.84193315    | -0.3872273    | -0.3124234    | 1316.78    | 1345.73   | 1372.41   |
|                                                            | H             | -1.0467476    | 1.42840808    | 2.60433678    | 1386.32    | 1417.37   | 1463.49   |
|                                                            | H             | -1.951961     | 0.74080732    | 1.24204777    | 1484.19    | 1502.81   | 1511.56   |
|                                                            | H             | -2.6675561    | -0.9673936    | 2.7144416     | 1513.91    | 3057.35   | 3060.06   |
|                                                            | H             | -1.3048334    | -3.6002249    | 2.08724473    | 3063.78    | 3091.56   | 3116.27   |
|                                                            | H             | -1.9044395    | 0.20495554    | 4.75134452    | 3133.84    | 3141.27   | 3145.34   |
|                                                            | H             | -1.6226479    | -1.530349     | 4.79876669    | 3196.30    | 3871.12   | 3881.53   |
|                                                            | H             | 0.53315748    | 0.57257118    | 4.19579687    | ! 188.6313 | 248.6320  |           |
|                                                            | H             | 0.36517349    | -0.3386853    | 5.6885079     | 293.4371   | !Torsions |           |
|                                                            | H             | 0.77069851    | -1.1819085    | 4.19284954    |            |           |           |
| QOOH-1 = OH + Vinyl<br>Alcohol + Propanal                  | O             | 0.00302825    | -0.0075957    | -0.0211216    | 1084.91i   | 45.61     | 67.28     |
|                                                            | C             | 0.00591269    | 0.00487667    | 1.32598863    | 87.86      | 139.68    | 193.20    |
|                                                            | H             | 0.96711319    | 0.00859062    | 1.82191775    | 263.67     | 299.94    | 349.21    |
|                                                            | C             | -1.1922961    | -0.223498     | 1.99785648    | 411.38     | 462.91    | 473.71    |
|                                                            | C             | -1.579235     | -2.0287116    | 1.9805789     | 622.70     | 717.11    | 789.81    |
|                                                            | O             | -0.9303456    | -2.4601521    | 3.01772987    | 878.31     | 890.85    | 924.72    |
|                                                            | O             | -1.1699696    | -4.2314155    | 3.02487746    | 984.63     | 1032.39   | 1046.73   |
|                                                            | C             | -3.090764     | -2.1487403    | 2.03187754    | 1073.22    | 1114.13   | 1137.66   |
|                                                            | C             | -3.6854863    | -1.6681824    | 3.34606239    | 1184.06    | 1284.18   | 1292.01   |
|                                                            | H             | 0.89962127    | 0.02506929    | -0.3634704    | 1304.94    | 1338.33   | 1358.42   |
|                                                            | H             | -1.1900881    | 0.01142658    | 3.05285048    | 1399.07    | 1445.51   | 1448.61   |
|                                                            | H             | -2.0811935    | 0.10560057    | 1.46819103    | 1478.15    | 1502.11   | 1508.84   |
|                                                            | H             | -1.1669503    | -2.301381     | 1.00154295    | 1579.78    | 3018.37   | 3060.01   |
|                                                            | H             | -0.283696     | -4.3711724    | 3.37942167    | 3065.93    | 3099.63   | 3132.14   |
|                                                            | H             | -3.5317131    | -1.6375667    | 1.1739359     | 3140.19    | 3154.28   | 3203.91   |
|                                                            | H             | -3.2879156    | -3.2171865    | 1.90923425    | 3241.78    | 3857.01   | 3896.37   |
|                                                            | H             | -3.5490622    | -0.5936298    | 3.47961319    | ! 115.5927 | 205.7723  |           |
| H                                                          | -4.753942     | -1.8735025    | 3.38788198    | 245.8156      | !Torsions  |           |           |
| H                                                          | -3.201429     | -2.1800894    | 4.17578049    |               |            |           |           |
| QOOH-1 = QOOH-5                                            | O             | 0.0241252     | 0.00033466    | 0.00541997    | 1713.12i   | 126.69    | 160.58    |
|                                                            | C             | 0.00795953    | -0.0138374    | 1.40708372    | 243.65     | 297.06    | 341.98    |
|                                                            | H             | 1.0278129     | -0.0209325    | 1.7809061     | 395.94     | 514.99    | 551.48    |
|                                                            | C             | -0.9076879    | 1.00663369    | 2.03863485    | 570.10     | 602.06    | 713.03    |
|                                                            | C             | -2.3743865    | 0.63030251    | 1.82042485    | 811.81     | 851.97    | 874.45    |
|                                                            | O             | -2.6628119    | 0.4451395     | 0.43400619    | 943.34     | 967.17    | 1005.11   |
|                                                            | O             | -2.4014525    | 1.65820199    | -0.2534973    | 1030.27    | 1050.32   | 1064.66   |
|                                                            | C             | -2.7070571    | -0.7155005    | 2.46773518    | 1098.28    | 1141.60   | 1172.88   |
|                                                            | C             | -1.790072     | -1.823297     | 2.00038587    | 1204.07    | 1256.89   | 1285.81   |
|                                                            | H             | -0.7911371    | -0.4191417    | -0.2958864    | 1340.73    | 1355.83   | 1371.38   |
|                                                            | H             | -0.7220307    | 1.04506301    | 3.11389839    | 1389.72    | 1413.52   | 1445.30   |
|                                                            | H             | -0.7108946    | 2.00546713    | 1.64123739    | 1455.83    | 1463.02   | 1471.13   |
|                                                            | H             | -3.0307711    | 1.41337641    | 2.20594937    | 1482.88    | 1524.73   | 3052.01   |
|                                                            | H             | -1.4653999    | 1.55519116    | -0.4902599    | 3059.23    | 3080.06   | 3104.77   |
|                                                            | H             | -2.6255687    | -0.5832221    | 3.54733803    | 3109.34    | 3122.51   | 3147.02   |
|                                                            | H             | -3.7533245    | -0.9462835    | 2.25019164    | 3204.95    | 3725.12   | 3806.33 ! |
|                                                            | H             | -0.6041437    | -1.1234125    | 1.77484697    | 133.1663   | 437.4065  | 456.7591  |
| H                                                          | -1.5556727    | -2.5927801    | 2.72748244    | !Torsions     |            |           |           |
| H                                                          | -2.0192936    | -2.2304406    | 1.01964261    |               |            |           |           |
| QOOH-1 = H <sub>2</sub> O + 3-<br>hydroxy-pentanal radical | C             | 0.0115820101  | 0.0283450476  | 0.000903117   | 2528.23i   | 116.18    | 147.26    |
|                                                            | C             | 0.0073767955  | 0.0052944358  | 1.5234152431  | 220.51     | 262.42    | 283.49    |
|                                                            | H             | 1.0537098559  | 0.0243679851  | -0.3239475479 | 318.09     | 369.91    | 403.94    |
|                                                            | H             | -0.4497170872 | -0.8896281083 | -0.3715573388 | 474.09     | 532.53    | 545.61    |
|                                                            | C             | 0.6007815541  | -1.3736388827 | 2.0660108157  | 681.7      | 790.25    | 816.08    |
| H                                                          | -1.0148764869 | 0.0582735368  | 1.9137020169  | 907.54        | 927.13     | 992.78    |           |

|                                |            |               |               |               |          |           |            |
|--------------------------------|------------|---------------|---------------|---------------|----------|-----------|------------|
|                                | C          | 0.8778187669  | -1.36981484   | 3.4918537172  | 993.96   | 1025.32   | 1043.11    |
|                                | H          | -0.0876605635 | -2.1738967892 | 1.8063485138  | 1086.82  | 1113.17   | 1139.08    |
|                                | H          | 1.5245212953  | -1.4916039555 | 1.4937101562  | 1202.26  | 1245.09   | 1271.13    |
|                                | H          | 0.3070155358  | -1.9512891404 | 4.2026616398  | 1283.54  | 1302.1    | 1340.24    |
|                                | O          | 1.8070786959  | -0.6165175164 | 4.0246580635  | 1380.37  | 1410.71   | 1434.24    |
|                                | H          | 2.1891638785  | -0.0230870379 | 3.3141228865  | 1464.14  | 1483.36   | 1502.72    |
|                                | O          | 0.6543779034  | 1.0715271353  | 2.0822913618  | 1510.16  | 1579.56   | 2686.9     |
|                                | O          | 2.3277919748  | 0.7551237208  | 1.9041164852  | 3036.4   | 3061.27   | 3062.82    |
|                                | H          | 2.5503790477  | 1.6913154538  | 1.9255887856  | 3065.95  | 3105.3    | 3131.78    |
|                                | C          | -0.7102491513 | 1.2502909415  | -0.5499516241 | 3146.28  | 3154.99   | 3221.19    |
|                                | H          | -0.2545226401 | 2.1619066241  | -0.1660548446 | 3883.99  |           |            |
|                                | H          | -0.6696890666 | 1.2782760374  | -1.6380318294 | ! 79.18  | 232.19    | ! Torsions |
|                                | H          | -1.7604687513 | 1.2503026823  | -0.2534645648 |          |           |            |
| QOOH-5 = OH + 2-Oxetaneethanol | O          | 0.20463065    | -0.0810622    | -0.0323656    | 1053.36i | 66.05     | 130.72     |
|                                | C          | 0.06192631    | 0.00512799    | 1.36413216    | 187.93   | 230.65    | 245.23     |
|                                | C          | 1.39839297    | 0.01916686    | 2.10059362    | 262.93   | 285.78    | 338.45     |
|                                | C          | 2.16046931    | 1.33232647    | 2.08891902    | 407.22   | 438.64    | 505.10     |
|                                | C          | 3.58587173    | 1.18812324    | 2.62105134    | 576.92   | 657.08    | 782.08     |
|                                | C          | 4.2609934     | 1.01315019    | 1.29423663    | 826.29   | 863.73    | 920.46     |
|                                | H          | 4.24432574    | 0.04696203    | 0.81297991    | 961.99   | 1000.58   | 1041.71    |
|                                | H          | 5.00575387    | 1.71267954    | 0.95012023    | 1058.71  | 1067.56   | 1117.36    |
|                                | O          | 2.53621799    | 1.77292493    | 0.75790914    | 1142.60  | 1158.94   | 1226.81    |
|                                | O          | 1.14500409    | 2.49021308    | 0.21459996    | 1248.06  | 1262.52   | 1299.48    |
|                                | H          | 0.53655754    | 0.77761914    | -0.3258395    | 1317.02  | 1357.25   | 1414.21    |
|                                | H          | -0.5266844    | 0.88491972    | 1.6496052     | 1417.18  | 1451.99   | 1468.90    |
|                                | H          | -0.4971639    | -0.8786716    | 1.6729631     | 1475.80  | 1498.90   | 1509.81    |
|                                | H          | 1.22735604    | -0.2275935    | 3.15334984    | 3025.86  | 3043.11   | 3077.23    |
|                                | H          | 2.02663199    | -0.7703677    | 1.67853241    | 3084.98  | 3099.73   | 3104.58    |
|                                | H          | 1.57660481    | 2.12687971    | 2.55378914    | 3146.99  | 3180.51   | 3285.46    |
|                                | H          | 3.9223203     | 2.09660172    | 3.1141128     | 3774.96  | 3867.36   |            |
| H                              | 3.70869747 | 0.34182215    | 3.29834437    | !             | 605.8016 | !Torsions |            |
| H                              | 1.58111434 | 3.11544815    | -0.3751096    |               |          |           |            |

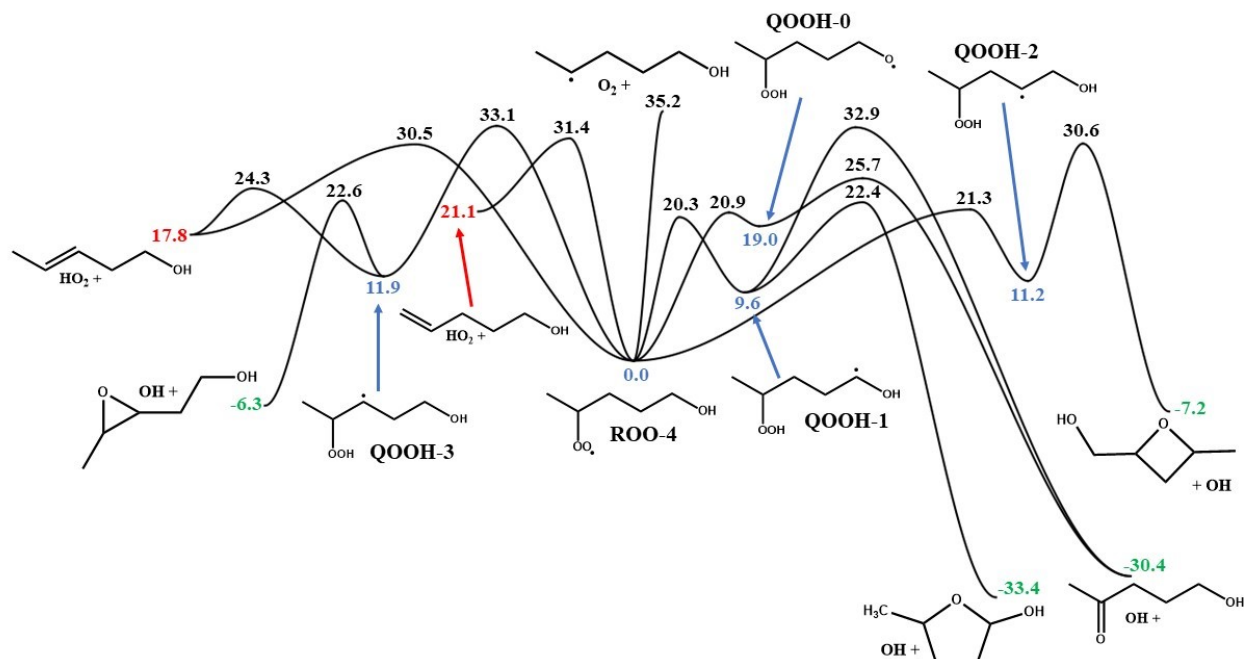

**Figure S9.** Potential energy surface for n-Pentanol ROO4 calculated at CCSD(T)/cc-pV $\infty$ Z//M06-2X/cc-pVTZ level of theory. Energies are given in kcal/mol. QOOH energies are given in blue, HO<sub>2</sub> producing routes in red, OH producing rates in green.

**Table S15.** Calculated relative energies for n-Pentanol ROO4 PES

| Species                                                                               | Relative energy (kcal/mol) |
|---------------------------------------------------------------------------------------|----------------------------|
| N-pentanol ROO-4                                                                      | 0.0                        |
| QOOH-0                                                                                | 19.0                       |
| QOOH-1                                                                                | 9.6                        |
| QOOH-2                                                                                | 21.3                       |
| QOOH-3                                                                                | 33.1                       |
| HO <sub>2</sub> + 3-Penten-1-ol                                                       | 17.8                       |
| HO <sub>2</sub> + 4-Penten-1-ol                                                       | 21.1                       |
| O <sub>2</sub> + CH <sub>3</sub> CHCH <sub>2</sub> CH <sub>2</sub> CH <sub>2</sub> OH | 35.2                       |
| OH + 5-Hydroxy-2-pentanone                                                            | -30.4                      |
| OH + 5-methylTHF-2ol                                                                  | -33.4                      |
| OH + (4-methyloxetan-2-yl)methanol                                                    | -7.2                       |
| OH + 2-(3-methyloxiran-2-yl)ethanol                                                   | -6.3                       |
| N-pentanol ROO-4 = QOOH-0                                                             | 20.9                       |
| N-pentanol ROO-4 = QOOH-1                                                             | 20.3                       |
| N-pentanol ROO-4 = QOOH-2                                                             | 21.3                       |
| N-pentanol ROO-4 = QOOH-3                                                             | 33.1                       |
| N-pentanol ROO-4 = HO <sub>2</sub> + 3-Penten-1-ol                                    | 30.5                       |
| N-pentanol ROO-4 = HO <sub>2</sub> + 4-Penten-1-ol                                    | 31.4                       |

|                                              |      |
|----------------------------------------------|------|
| QOOH-0 = OH + 5-Hydroxy-2-pentanone          | 25.7 |
| QOOH-1 = OH + 5-Hydroxy-2-pentanone          | 32.9 |
| QOOH-1 = OH + 5-methyl-THF-2ol               | 22.4 |
| QOOH-2 = OH + (4-methyloxetan-2-yl)methanol  | 30.6 |
| QOOH-3 = HO <sub>2</sub> + 3-Penten-1-ol     | 24.3 |
| QOOH-3 = OH + 2-(3-methyloxiran-2-yl)ethanol | 22.6 |

**Table S16.** Optimized geometries and frequencies (m062x/cc-pVTZ) of relevant stationary points on the calculated n-Pentanol ROO4 PES

| Species                                                                                                    | Geometry   |            |            | Frequencies (cm <sup>-1</sup> ) |         |         |           |         |
|------------------------------------------------------------------------------------------------------------|------------|------------|------------|---------------------------------|---------|---------|-----------|---------|
| 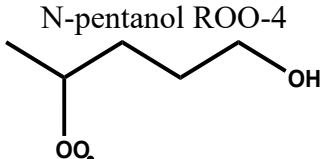 <p>N-pentanol ROO-4</p> | C          | 0.00049362 | -0.026066  | 0.00457709                      | 163.27  | 234.54  | 343.00    |         |
|                                                                                                            | C          | 0.00445625 | 0.01110842 | 1.51648964                      | 378.37  | 430.86  | 515.70    |         |
|                                                                                                            | C          | 1.41360792 | 0.03227082 | 2.09758397                      | 568.62  | 803.20  | 833.10    |         |
|                                                                                                            | C          | 1.52348936 | 0.20342873 | 3.61174046                      | 886.78  | 915.85  | 930.28    |         |
|                                                                                                            | C          | 1.07554782 | -0.9995585 | 4.42970393                      | 1018.88 | 1047.12 | 1109.13   |         |
|                                                                                                            | O          | -0.2755494 | -1.3624142 | 4.22363831                      | 1139.76 | 1164.02 | 1166.44   |         |
|                                                                                                            | H          | 2.56949613 | 0.39770952 | 3.85877068                      | 1196.45 | 1276.38 | 1301.30   |         |
|                                                                                                            | H          | 0.9682776  | 1.08952029 | 3.92886912                      | 1314.53 | 1338.84 | 1383.64   |         |
|                                                                                                            | H          | 1.26126581 | -0.7983675 | 5.49011495                      | 1387.06 | 1401.23 | 1407.08   |         |
|                                                                                                            | H          | -0.8058625 | -0.5579782 | 4.19069711                      | 1418.97 | 1445.18 | 1472.34   |         |
|                                                                                                            | H          | -1.0169741 | -0.0266949 | -0.3811419                      | 1490.31 | 1491.87 | 1502.70   |         |
|                                                                                                            | H          | 1.89181861 | -0.9055932 | 1.80095851                      | 1526.18 | 3029.04 | 3050.65   |         |
|                                                                                                            | H          | 1.96158661 | 0.83714081 | 1.60129368                      | 3061.66 | 3072.86 | 3082.06   |         |
|                                                                                                            | H          | -0.5864131 | -0.7935624 | 1.94531206                      | 3092.69 | 3104.75 | 3140.40   |         |
|                                                                                                            | H          | 0.50401588 | -0.9287659 | -0.3381572                      | 3157.31 | 3160.37 | 3825.52   |         |
|                                                                                                            | H          | 1.66931277 | -1.8742818 | 4.15594567                      | ! 97.92 | 120.44  | 137.59    |         |
|                                                                                                            | O          | -0.6734535 | 1.25267427 | 1.87683433                      | 212.18  | 484.62  | 308.56    |         |
| H                                                                                                          | 0.52891537 | 0.83783828 | -0.398703  | !Torsions                       |         |         |           |         |
| O                                                                                                          | -1.2914273 | 1.18531145 | 3.01431852 |                                 |         |         |           |         |
|  <p>QOOH-0</p>          | C          | 0.06221615 | 0.08532497 | 0.03924041                      | 164.3   | 204.93  | 330.4     | 375.23  |
|                                                                                                            | C          | 0.00704607 | 0.00400062 | 1.55277974                      | 466.83  | 514.21  | 620.1     | 749.77  |
|                                                                                                            | O          | 1.37256442 | -0.0343389 | 1.95858031                      | 798.97  | 868.23  | 923.61    | 932.19  |
|                                                                                                            | O          | 1.42528193 | -0.3156086 | 3.34698949                      | 963.94  | 1024.43 | 1050.97   |         |
|                                                                                                            | C          | -0.7642516 | 1.14813057 | 2.20616256                      | 1056.89 | 1080.24 | 1141.54   |         |
|                                                                                                            | C          | -0.3253828 | 2.56065409 | 1.82839067                      | 1178.57 | 1201.82 | 1225.92   |         |
|                                                                                                            | C          | 1.12450213 | 2.90401345 | 2.18670797                      | 1249.94 | 1304.19 | 1370.13   |         |
|                                                                                                            | O          | 1.49969278 | 2.54768253 | 3.45024705                      | 1381.0  | 1386.96 | 1400.7    | 1409.64 |
|                                                                                                            | H          | 0.62381569 | 0.96230235 | -0.2837073                      | 1427.81 | 1462.95 | 1484.48   |         |
|                                                                                                            | H          | -0.9458035 | 0.15212616 | -0.3689483                      | 1485.86 | 1495.41 | 1513.45   |         |
|                                                                                                            | H          | 0.55032349 | -0.7973737 | -0.3682488                      | 2911.77 | 3027.72 | 3056.43   |         |
|                                                                                                            | H          | -0.455513  | -0.9384871 | 1.85860643                      | 3068.07 | 3072.76 | 3079.9    |         |
|                                                                                                            | H          | -1.8158791 | 1.02786892 | 1.93764398                      | 3104.52 | 3123.6  | 3143.05   |         |
|                                                                                                            | H          | -0.7106681 | 1.02496714 | 3.28777837                      | 3158.23 | 3708.87 |           |         |
|                                                                                                            | H          | -0.4537103 | 2.73888127 | 0.75883208                      | ! 76.45 | 162.29  | 225.88    | 265.64  |
|                                                                                                            | H          | -0.9739719 | 3.27501842 | 2.33825302                      | 296.3   | 544.24  | !Torsions |         |
|                                                                                                            | H          | 1.80566923 | 2.29917938 | 1.55703634                      |         |         |           |         |
| H                                                                                                          | 1.35342722 | 3.95666504 | 1.98240548 |                                 |         |         |           |         |
| H                                                                                                          | 1.48639998 | 0.57874246 | 3.72163779 |                                 |         |         |           |         |

|                                                                                                   |            |            |            |            |           |         |         |
|---------------------------------------------------------------------------------------------------|------------|------------|------------|------------|-----------|---------|---------|
| 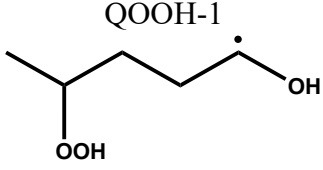 <p>QOOH-1</p>   | C          | 0.00210814 | -0.0215518 | 0.0070221  | 189.54    | 293.03  | 304.81  |
|                                                                                                   | C          | -0.0036911 | 0.00349908 | 1.52213092 | 401.16    | 474.54  | 489.06  |
|                                                                                                   | C          | 1.39529058 | 0.03189375 | 2.11542921 | 545.52    | 669.15  | 789.69  |
|                                                                                                   | C          | 1.41252988 | 0.04841853 | 3.64667451 | 867.79    | 907.40  | 948.69  |
|                                                                                                   | C          | 0.64400944 | -1.0606545 | 4.26489732 | 975.75    | 1040.35 | 1063.91 |
|                                                                                                   | O          | 0.99509488 | -2.3062239 | 3.81565471 | 1111.15   | 1129.62 | 1161.83 |
|                                                                                                   | H          | 2.45894549 | 0.01757401 | 3.97922573 | 1207.55   | 1216.46 | 1272.97 |
|                                                                                                   | H          | 0.99494534 | 0.99248186 | 3.99454342 | 1294.20   | 1336.69 | 1372.13 |
|                                                                                                   | H          | 1.89904825 | -0.899751  | 1.76863679 | 1382.76   | 1402.82 | 1404.61 |
|                                                                                                   | H          | 1.94673749 | 0.85795094 | 1.71883736 | 1419.82   | 1453.64 | 1468.49 |
|                                                                                                   | H          | -1.0134686 | 0.04599254 | -0.3770138 | 1481.29   | 1489.00 | 1506.95 |
|                                                                                                   | H          | 0.57863755 | 0.82034217 | -0.3777256 | 2993.67   | 3045.42 | 3066.79 |
|                                                                                                   | H          | 0.45118549 | -0.9473372 | -0.3528131 | 3075.25   | 3112.26 | 3126.87 |
|                                                                                                   | H          | -0.5653442 | -0.8500874 | 1.91542293 | 3140.13   | 3157.88 | 3170.45 |
|                                                                                                   | H          | 0.28967149 | -0.9922745 | 5.2864948  | 3825.52   | 3903.26 |         |
|                                                                                                   | O          | -0.6149694 | 1.19597742 | 2.01157799 | ! 36.81   | 74.74   | 118.53  |
|                                                                                                   | O          | -1.9947029 | 1.15451662 | 1.67864894 | 187.70    | 225.19  | 240.96  |
| H                                                                                                 | -2.3846174 | 0.89111069 | 2.52082406 | 349.87     | !Torsions |         |         |
| H                                                                                                 | 0.51451249 | -2.9773909 | 4.30457482 |            |           |         |         |
|  <p>QOOH-2</p>  | C          | 0.03138482 | 0.09627912 | 0.01277276 | 186.07    | 233.12  | 302.27  |
|                                                                                                   | C          | -0.0061633 | -0.0390503 | 1.52244477 | 339.97    | 363.99  | 497.16  |
|                                                                                                   | C          | 1.41373962 | -0.1056085 | 2.11453295 | 544.74    | 590.00  | 838.39  |
|                                                                                                   | C          | 1.47861376 | -0.0925931 | 3.59961437 | 886.57    | 899.00  | 939.79  |
|                                                                                                   | C          | 1.83480569 | 1.1540712  | 4.32814696 | 1000.24   | 1017.30 | 1055.76 |
|                                                                                                   | O          | 0.83432842 | 2.18177314 | 4.20553261 | 1102.02   | 1128.97 | 1158.02 |
|                                                                                                   | H          | 1.10181056 | -0.9440285 | 4.14899426 | 1170.33   | 1214.45 | 1271.60 |
|                                                                                                   | H          | 2.78906132 | 1.54923443 | 3.96187469 | 1292.63   | 1355.07 | 1365.07 |
|                                                                                                   | H          | 1.87821529 | -1.016201  | 1.72169888 | 1381.87   | 1403.55 | 1410.29 |
|                                                                                                   | H          | 1.9807604  | 0.74028958 | 1.70988485 | 1426.80   | 1474.82 | 1488.86 |
|                                                                                                   | H          | -0.9773152 | 0.0942289  | -0.3940473 | 1502.63   | 1505.89 | 1514.03 |
|                                                                                                   | H          | 0.51624422 | 1.03206955 | -0.2676226 | 3023.13   | 3026.71 | 3064.33 |
|                                                                                                   | H          | 0.59433153 | -0.7267727 | -0.4256827 | 3070.88   | 3090.16 | 3141.25 |
|                                                                                                   | H          | 1.93274545 | 0.97386357 | 5.39573858 | 3143.71   | 3161.24 | 3205.11 |
|                                                                                                   | O          | -0.7173629 | 1.09990904 | 1.99493596 | 3637.97   | 3823.38 |         |
|                                                                                                   | H          | -0.5723487 | -0.9235899 | 1.81870884 | ! 86.41   | 102.53  | 143.47  |
|                                                                                                   | O          | -1.3460008 | 0.7664622  | 3.22571599 | 221.78    | 403.37  | 462.68  |
| H                                                                                                 | -0.7798351 | 1.24177141 | 3.86085197 | 632.97     | !Torsions |         |         |
| H                                                                                                 | 0.77082697 | 2.43046986 | 3.27548817 |            |           |         |         |
|  <p>QOOH-3</p> | C          | -0.0723748 | -0.1066942 | 0.06365031 | 279.61    | 308.50  | 358.68  |
|                                                                                                   | C          | 0.0397236  | 0.08963324 | 1.56225359 | 424.27    | 501.51  | 525.15  |
|                                                                                                   | C          | 1.43991401 | 0.04660772 | 2.06124504 | 554.32    | 594.06  | 830.21  |
|                                                                                                   | C          | 1.78992249 | -0.4600822 | 3.41481538 | 876.64    | 902.91  | 929.21  |
|                                                                                                   | C          | 1.62397318 | 0.60403829 | 4.51401697 | 1014.37   | 1015.89 | 1078.24 |
|                                                                                                   | O          | 0.28813314 | 1.03063354 | 4.64670247 | 1098.74   | 1117.87 | 1149.19 |
|                                                                                                   | H          | 1.14574929 | -1.3033438 | 3.67700965 | 1189.13   | 1214.92 | 1253.57 |
|                                                                                                   | H          | 2.825026   | -0.8081415 | 3.43178422 | 1315.51   | 1342.41 | 1355.53 |
|                                                                                                   | H          | 2.28995801 | 1.44842572 | 4.3063242  | 1399.75   | 1405.74 | 1410.87 |
|                                                                                                   | H          | 2.19300845 | 0.54879658 | 1.46673812 | 1444.18   | 1451.89 | 1478.01 |
|                                                                                                   | H          | -1.1040198 | 0.02181378 | -0.2568428 | 1489.14   | 1500.89 | 1517.01 |
|                                                                                                   | H          | 0.55111874 | 0.62473796 | -0.4504875 | 3030.97   | 3046.95 | 3052.18 |
|                                                                                                   | H          | -0.5666336 | -0.6462306 | 2.10001796 | 3070.99   | 3102.27 | 3113.48 |
|                                                                                                   | H          | 1.91382709 | 0.17630063 | 5.47347359 | 3145.33   | 3161.16 | 3186.10 |
|                                                                                                   | O          | -0.4683664 | 1.3979965  | 1.9242821  | 3782.09   | 3801.00 |         |
|                                                                                                   | H          | 0.26182482 | -1.1070204 | -0.2098496 | ! 44.07   | 72.85   | 111.82  |
|                                                                                                   | O          | -1.8745411 | 1.40743708 | 1.7097246  | 206.05    | 229.11  | 248.33  |

|                                                                                                                                                                         |            |            |            |            |                  |           |           |
|-------------------------------------------------------------------------------------------------------------------------------------------------------------------------|------------|------------|------------|------------|------------------|-----------|-----------|
|                                                                                                                                                                         | H          | -2.2129364 | 1.2125776  | 2.59375214 | 290.68 !Torsions |           |           |
|                                                                                                                                                                         | H          | 0.03689112 | 1.46982719 | 3.82439152 |                  |           |           |
| 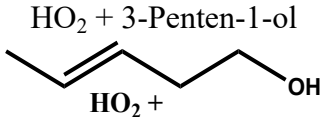 <p>HO<sub>2</sub> + 3-Penten-1-ol</p>                                                 | O          | 0.50553254 | 2.59512924 | 1.64024162 | 1161.48          | 1475.38   | 3553.10   |
|                                                                                                                                                                         | O          | -0.1679742 | 2.44348437 | 0.50783059 |                  |           |           |
|                                                                                                                                                                         | H          | -0.2367003 | 1.48037439 | 0.35008979 |                  |           |           |
|                                                                                                                                                                         | C          | 0.30741342 | 0.53663611 | 0.31779885 | 212.22           | 305.22    | 404.48    |
|                                                                                                                                                                         | C          | 0.11748188 | -0.2747225 | 1.56168933 | 487.97           | 585.71    | 736.62    |
|                                                                                                                                                                         | C          | 1.06960779 | -0.8340096 | 2.29993048 | 813.19           | 914.17    | 1006.86   |
|                                                                                                                                                                         | C          | 2.54829385 | -0.7549825 | 2.05604885 | 1025.31          | 1038.79   | 1052.87   |
|                                                                                                                                                                         | C          | 3.17925167 | 0.36835798 | 2.86244458 | 1072.29          | 1112.21   | 1160.14   |
|                                                                                                                                                                         | O          | 4.57819267 | 0.32537583 | 2.64856422 | 1233.77          | 1238.47   | 1291.00   |
|                                                                                                                                                                         | H          | -0.1404099 | 1.52489465 | 0.43670741 | 1319.37          | 1325.18   | 1402.26   |
|                                                                                                                                                                         | H          | -0.1914926 | 0.06548623 | -0.5312159 | 1441.33          | 1454.06   | 1487.48   |
|                                                                                                                                                                         | H          | 1.35635719 | 0.67217956 | 0.06445755 | 1490.90          | 1512.54   | 1534.21   |
|                                                                                                                                                                         | H          | -0.9115007 | -0.4093642 | 1.87881797 | 1759.41          | 3015.82   | 3049.79   |
|                                                                                                                                                                         | H          | 0.76532983 | -1.3789717 | 3.18759787 | 3059.11          | 3080.81   | 3108.21   |
|                                                                                                                                                                         | H          | 3.02779919 | -1.690201  | 2.34904747 | 3126.12          | 3151.02   | 3160.00   |
|                                                                                                                                                                         | H          | 2.77763966 | -0.5958202 | 1.00303124 | 3180.40          | 3900.10   |           |
|                                                                                                                                                                         | H          | 2.75657684 | 1.32554537 | 2.5376014  | ! 28.3354        | 111.1528  |           |
|                                                                                                                                                                         | H          | 2.9376226  | 0.24020201 | 3.92346677 | 137.1140         | 268.8076  | !Torsions |
| H                                                                                                                                                                       | 4.99400023 | 1.02664967 | 3.15358488 |            |                  |           |           |
|  <p>HO<sub>2</sub> + 4-Penten-1-ol</p>                                               | O          | 0.50553254 | 2.59512924 | 1.64024162 | 1161.48          | 1475.38   | 3553.10   |
|                                                                                                                                                                         | O          | -0.1679742 | 2.44348437 | 0.50783059 |                  |           |           |
|                                                                                                                                                                         | H          | -0.2367003 | 1.48037439 | 0.35008979 |                  |           |           |
|                                                                                                                                                                         | C          | -0.0272666 | 0.01693358 | 0.00420408 | 170.18           | 293.55    | 422.78    |
|                                                                                                                                                                         | C          | -0.0057323 | 0.00997062 | 1.33040751 | 489.29           | 654.55    | 811.08    |
|                                                                                                                                                                         | H          | 0.89122364 | 0.00506179 | -0.5711245 | 877.73           | 918.93    | 955.32    |
|                                                                                                                                                                         | H          | -0.9563146 | 0.04644576 | -0.5488319 | 975.65           | 1015.47   | 1048.14   |
|                                                                                                                                                                         | C          | 1.23635754 | -0.0225536 | 2.16850263 | 1067.96          | 1128.09   | 1156.01   |
|                                                                                                                                                                         | C          | 1.32734663 | -1.2423691 | 3.09262829 | 1213.17          | 1247.29   | 1285.07   |
|                                                                                                                                                                         | C          | 1.39779665 | -2.5695416 | 2.34866035 | 1325.90          | 1360.53   | 1382.68   |
|                                                                                                                                                                         | O          | 0.15964152 | -2.9645816 | 1.79168399 | 1399.38          | 1433.00   | 1455.56   |
|                                                                                                                                                                         | H          | -0.9465082 | 0.01964466 | 1.87470355 | 1475.09          | 1487.08   | 1515.31   |
|                                                                                                                                                                         | H          | 2.11257198 | 0.00673123 | 1.51592775 | 1729.36          | 3012.47   | 3048.02   |
|                                                                                                                                                                         | H          | 1.26459168 | 0.88177872 | 2.78220093 | 3059.31          | 3089.01   | 3106.74   |
|                                                                                                                                                                         | H          | 2.21852562 | -1.1406455 | 3.71569009 | 3110.17          | 3152.13   | 3161.30   |
|                                                                                                                                                                         | H          | 0.46515928 | -1.2708675 | 3.76303536 | 3246.67          | 3863.45   |           |
|                                                                                                                                                                         | H          | 2.1756791  | -2.5181256 | 1.57619265 | ! 78.69          | 114.61    | 335.54    |
|                                                                                                                                                                         | H          | 1.67919752 | -3.3636631 | 3.03965912 | 432.24           | !Torsions |           |
| H                                                                                                                                                                       | -0.0787164 | -2.3321037 | 1.10820512 |            |                  |           |           |
|  <p>O<sub>2</sub> + CH<sub>3</sub>CHCH<sub>2</sub>CH<sub>2</sub>CH<sub>2</sub>OH</p> | O          | 0.0000000  | 0.0000000  | 0.00794919 | 1758.25          |           |           |
|                                                                                                                                                                         | O          | 0.0000000  | 0.0000000  | 1.19781253 |                  |           |           |
|                                                                                                                                                                         | O          | 0.00438981 | 0.0433413  | -0.0062954 | 145.40           | 316.58    | 366.63    |
|                                                                                                                                                                         | C          | 0.0004821  | -0.0074812 | 1.41018085 | 408.92           | 519.09    | 754.61    |
|                                                                                                                                                                         | C          | 1.39985003 | -0.0034647 | 2.00182314 | 877.67           | 915.74    | 945.66    |
|                                                                                                                                                                         | C          | 2.23783258 | -1.1953123 | 1.55263137 | 984.93           | 1038.53   | 1079.86   |
|                                                                                                                                                                         | C          | 3.63009569 | -1.1712338 | 2.07375895 | 1115.18          | 1128.32   | 1147.60   |
|                                                                                                                                                                         | C          | 4.51111614 | -2.3585353 | 1.92362181 | 1181.01          | 1244.79   | 1289.25   |
|                                                                                                                                                                         | H          | 1.74478895 | -2.1241901 | 1.86521948 | 1314.33          | 1372.87   | 1386.65   |
|                                                                                                                                                                         | H          | 2.23592022 | -1.2299798 | 0.45398613 | 1409.92          | 1423.78   | 1432.48   |
|                                                                                                                                                                         | H          | 1.3259407  | 0.00709056 | 3.09218877 | 1474.13          | 1478.81   | 1489.24   |
|                                                                                                                                                                         | H          | 1.90639242 | 0.92542063 | 1.71698058 | 1492.23          | 1518.69   | 2990.54   |

|                                                                                                                               |            |              |              |             |           |         |               |
|-------------------------------------------------------------------------------------------------------------------------------|------------|--------------|--------------|-------------|-----------|---------|---------------|
|                                                                                                                               | H          | -0.5101887   | -0.9364771   | 1.66777244  | 2996.13   | 3022.99 | 3031.73       |
|                                                                                                                               | H          | -0.5877283   | 0.81739825   | 1.82464317  | 3039.49   | 3065.26 | 3085.36       |
|                                                                                                                               | H          | 0.42441303   | 0.8629837    | -0.2785423  | 3104.10   | 3132.49 | 3183.01       |
|                                                                                                                               | H          | 5.43139152   | -2.2605105   | 2.49715389  | 3878.75   |         |               |
|                                                                                                                               | H          | 4.79572612   | -2.5225477   | 0.87554931  | ! 48.39   | 79.93   | 121.34        |
|                                                                                                                               | H          | 4.00136138   | -3.2698933   | 2.24759197  | 185.59    | 280.74  | ! Torsions    |
|                                                                                                                               | H          | 4.07178636   | -0.2140255   | 2.31995981  |           |         |               |
| <p>OH + 5-Hydroxy-2-pentanone</p> 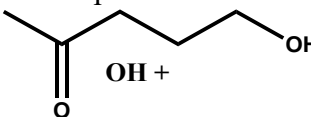           | O          | 0.00000000   | 0.00000000   | -0.00571069 | 3776.00   |         |               |
|                                                                                                                               | H          | 0.00000000   | 0.00000000   | 0.96571069  |           |         |               |
|                                                                                                                               | C          | -0.00090238  | -0.03722963  | -0.01381492 | 265.28    | 310.42  | 374.60        |
|                                                                                                                               | C          | -0.00393088  | 0.02417681   | 1.48996651  | 485.29    | 535.70  | 599.45        |
|                                                                                                                               | C          | 1.356399012  | 0.02769792   | 2.16088620  | 760.52    | 834.90  | 884.82        |
|                                                                                                                               | C          | 1.328577951  | 0.56601908   | 3.58353934  | 912.75    | 977.18  | 1029.06       |
|                                                                                                                               | C          | 1.272512439  | 2.08814268   | 3.60467380  | 1037.48   | 1110.12 | 1140.94       |
|                                                                                                                               | O          | 0.276355238  | 2.61189646   | 2.748053951 | 1180.32   | 1205.72 | 1241.19       |
|                                                                                                                               | O          | -1.032469402 | 0.05785116   | 2.122496665 | 1296.78   | 1363.92 | 1384.46       |
|                                                                                                                               | H          | 0.7309707731 | -0.760026    | -0.37477947 | 1390.76   | 1408.83 | 1436.17       |
|                                                                                                                               | H          | 0.2998361598 | 0.94486196   | -0.38549287 | 1452.61   | 1467.68 | 1480.27       |
|                                                                                                                               | H          | -0.99348451  | -0.275492201 | -0.38397966 | 1484.61   | 1525.86 | 1837.73       |
|                                                                                                                               | H          | -0.548667946 | 2.146827108  | 2.92234571  | 3037.18   | 3051.21 | 3065.07       |
|                                                                                                                               | H          | 1.698296767  | -1.012194277 | 2.14045054  | 3074.40   | 3090.18 | 3092.96       |
|                                                                                                                               | H          | 2.054398212  | 0.590013033  | 1.535343514 | 3121.70   | 3131.65 | 3182.10       |
|                                                                                                                               | H          | 0.458525844  | 0.153509337  | 4.097146228 | 3848.01   | ! 31.47 | 127.75        |
|                                                                                                                               | H          | 2.214107828  | 0.241386953  | 4.131481995 | 148.55    | 159.41  | 464.24        |
|                                                                                                                               | H          | 1.133943487  | 2.441568892  | 4.631238671 | !Torsions |         |               |
|                                                                                                                               | H          | 2.216709420  | 2.497574561  | 3.24076278  |           |         |               |
| <p>OH + 5-methylTHF-2ol</p>                | O          | 0.00000000   | 0.00000000   | -0.00571069 | 3776.00   |         |               |
|                                                                                                                               | H          | 0.00000000   | 0.00000000   | 0.96571069  |           |         |               |
|                                                                                                                               | C          | 0.00028358   | -0.001144    | -0.0001249  | 54.27     | 187.04  | 339.41        |
|                                                                                                                               | C          | -0.0032182   | -0.0007748   | 1.51360539  | 417.03    | 458.27  | 516.60        |
|                                                                                                                               | H          | 1.02407629   | -0.0013279   | 1.88712538  | 615.00    | 785.05  | 829.06        |
|                                                                                                                               | C          | -0.7974287   | 1.15357383   | 2.13818207  | 876.81    | 919.85  | 926.47        |
|                                                                                                                               | C          | -1.4798701   | 0.48981129   | 3.33384933  | 976.14    | 1011.56 | 1033.32       |
|                                                                                                                               | C          | -1.7430339   | -0.8953466   | 2.77402096  | 1057.29   | 1141.55 | 1147.09       |
|                                                                                                                               | O          | -2.9021967   | -0.8189038   | 1.97650438  | 1163.60   | 1208.63 | 1235.80       |
|                                                                                                                               | O          | -0.6144895   | -1.2076519   | 2.00475315  | 1257.52   | 1314.95 | 1345.70       |
|                                                                                                                               | H          | 0.53533923   | -0.8685227   | -0.3838225  | 1366.88   | 1391.19 | 1399.58       |
|                                                                                                                               | H          | 0.48266026   | 0.90063253   | -0.3795674  | 1414.97   | 1444.00 | 1482.11       |
|                                                                                                                               | H          | -1.0260335   | -0.0307837   | -0.3671379  | 1488.82   | 1499.57 | 1505.50       |
|                                                                                                                               | H          | -0.1566794   | 1.98773494   | 2.4146197   | 3052.74   | 3061.56 | 3081.22       |
|                                                                                                                               | H          | -1.5487815   | 1.51119904   | 1.43451457  | 3093.09   | 3098.50 | 3136.50       |
|                                                                                                                               | H          | -0.7995758   | 0.41132959   | 4.18164594  | 3144.50   | 3148.80 | 3163.01       |
|                                                                                                                               | H          | -2.3958333   | 0.98122292   | 3.65018686  | 3873.78   |         |               |
|                                                                                                                               | H          | -1.8470984   | -1.6807751   | 3.52483674  | ! 253.91  | 311.31  | !Torsions     |
|                                                                                                                               | H          | -2.9669824   | -1.6392377   | 1.47919626  |           |         |               |
| <p>OH + (4-methyloxetan-2-yl)methanol</p>  | O          | 0.00000000   | 0.00000000   | -0.00571069 | 3776.00   |         |               |
|                                                                                                                               | H          | 0.00000000   | 0.00000000   | 0.96571069  |           |         |               |
|                                                                                                                               | C          | 0.00299798   | 0.01159375   | -0.0120154  | 74.82     | 246.13  | 272.2 404.68  |
|                                                                                                                               | H          | 0.0342442    | 0.02840066   | 1.07776395  | 443.52    | 596.35  | 746.6 816.24  |
|                                                                                                                               | H          | 1.02623614   | 0.01386001   | -0.3872219  | 901.0     | 911.4   | 941.15 957.84 |
| H                                                                                                                             | -0.4827179 | -0.9096893   | -0.3367822   | 1023.96     | 1073.88   | 1095.89 |               |

|  |   |             |             |             |           |           |                |
|--|---|-------------|-------------|-------------|-----------|-----------|----------------|
|  | C | -0.7487566  | 1.21004624  | -0.5296356  | 1115.32   | 1151.22   | 1172.15        |
|  | H | -0.793433   | 1.21032601  | -1.6206069  | 1203.07   | 1233.97   | 1262.36        |
|  | C | -2.1001722  | 1.54794635  | 0.11795922  | 1279.22   | 1304.92   | 1360.04        |
|  | H | -2.3127749  | 0.96184758  | 1.00915906  | 1378.55   | 1400.93   | 1419.55        |
|  | H | -2.9594286  | 1.56649504  | -0.5448162  | 1452.01   | 1484.3    | 1492.5 1499.85 |
|  | C | -1.4514541  | 2.91050069  | 0.40638995  | 1507.09   | 3018.7    | 3058.21        |
|  | O | -0.1766464  | 2.45240752  | -0.0651885  | 3066.46   | 3071.7    | 3072.78        |
|  | C | -1.9656052  | 4.07250457  | -0.4075171  | 3110.18   | 3134.3    | 3139.21 3177.0 |
|  | H | -1.2098627  | 4.86301098  | -0.3843273  | 3919.15   |           |                |
|  | H | -2.8851877  | 4.45347686  | 0.05246626  | !         | 129.21    | 155.4 233.68   |
|  | O | -2.2067507  | 3.63366609  | -1.7314856  | !Torsions |           |                |
|  | H | -2.1995262  | 4.38820339  | -2.321457   |           |           |                |
|  | H | -1.4031861  | 3.20615449  | 1.45732439  |           |           |                |
|  | O | 0.00000000  | 0.00000000  | -0.00571069 | 3776.00   |           |                |
|  | H | 0.00000000  | 0.00000000  | 0.96571069  |           |           |                |
|  | C | 0.01710404  | 0.00788610  | 0.01580231  | 252.47    | 359.52    | 428.56         |
|  | C | -0.01102377 | -0.02190248 | 1.51376145  | 440.67    | 451.56    | 543.16         |
|  |   |             |             |             | 796.70    | 854.80    | 896.61         |
|  | C | 1.20911727  | 0.01417474  | 2.32303375  | 952.82    | 960.30    | 1021.38        |
|  | H | 2.15330109  | 0.09126179  | 1.78915540  | 1060.60   | 1098.24   | 1132.38        |
|  |   |             |             |             | 1147.02   | 1179.66   | 1183.50        |
|  | C | 1.29324860  | -0.54390900 | 3.71648982  | 1240.69   | 1257.42   | 1293.86        |
|  | C | 1.93995626  | 0.45161926  | 4.67422545  | 1343.89   | 1385.66   | 1391.63        |
|  | O | 1.09792639  | 1.54923240  | 4.94624002  | 1418.66   | 1449.87   | 1466.16        |
|  | O | 0.39059840  | 1.17804169  | 2.16646753  | 1482.52   | 1496.81   | 1524.34        |
|  | O | 0.39059840  | 1.17804169  | 2.16646753  | 1540.69   | 3007.73   | 3066.04        |
|  | H | 0.93009267  | 0.48778620  | -0.33328506 | 3068.73   | 3107.51   | 3112.36        |
|  | H | -0.83525879 | 0.56621964  | -0.37048527 | 3132.13   | 3137.87   | 3139.74        |
|  | H | -0.02694916 | -1.00412422 | -0.38660753 | 3156.87   | 3843.87   |                |
|  | H | -0.88132759 | -0.48628238 | 1.96844145  | !         | 64.15     | 149.60 179.40  |
|  | H | 0.29310323  | -0.78069116 | 4.08429001  | 206.54    | !Torsions |                |
|  | H | 1.8741710   | -1.4683148  | 3.69213285  |           |           |                |
|  | H | 2.14409858  | -0.02927151 | 5.63056296  |           |           |                |
|  | H | 2.90125406  | 0.78493515  | 4.26211731  |           |           |                |
|  | H | 0.71234012  | 1.84337954  | 4.1140472   |           |           |                |
|  | C | 0.01684972  | 0.04755285  | 0.02341064  | 1431.21i  | 90.46     | 231.41         |
|  | C | 0.0113658   | 0.0044988   | 1.53777266  | 267.89    | 285.03    | 328.81         |
|  | O | 1.4016177   | 0.01239899  | 1.89827827  | 341.82    | 381.68    | 494.14         |
|  | O | 1.54988812  | -0.0618106  | 3.26232317  | 536.38    | 629.56    | 641.77         |
|  | C | -0.7668723  | 1.143496    | 2.19515405  | 741.30    | 799.25    | 839.33         |
|  | C | -0.2294468  | 2.54815734  | 1.92490162  | 887.75    | 913.99    | 939.37         |
|  | C | 1.20107514  | 2.72147954  | 2.42636564  | 981.53    | 1020.92   | 1054.04        |
|  | O | 1.41330022  | 2.27484662  | 3.69995595  | 1126.76   | 1135.68   | 1181.26        |
|  | H | 0.4892662   | 0.96052133  | -0.3379009  | 1201.27   | 1227.30   | 1251.99        |
|  | H | -1.0055304  | 0.01427541  | -0.3502811  | 1283.08   | 1357.15   | 1361.49        |

OH + 2-(3-methyloxiran-2-yl)ethanol

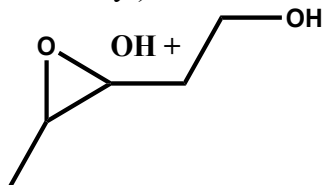

N-pentanol ROO-4 =  
QOOH-0



|                              |   |            |            |            |           |         |                  |
|------------------------------|---|------------|------------|------------|-----------|---------|------------------|
|                              | H | 0.56452316 | -0.8023887 | -0.3787604 | 1372.09   | 1381.87 | 1387.48          |
|                              | H | -0.4036674 | -0.9438909 | 1.88870676 | 1408.63   | 1424.33 | 1481.64          |
|                              | H | -1.7985223 | 1.06712581 | 1.84766581 | 1486.62   | 1496.23 | 1511.14          |
|                              | H | -0.7883387 | 0.97498259 | 3.27142085 | 1626.80   | 2870.56 | 2987.17          |
|                              | H | -0.2664579 | 2.78989892 | 0.86080378 | 3063.19   | 3069.63 | 3076.32          |
|                              | H | -0.8732331 | 3.26632844 | 2.43534074 | 3086.43   | 3108.05 | 3128.91          |
|                              | H | 1.89871758 | 2.17786591 | 1.7559168  | 3150.30   | 3157.71 |                  |
|                              | H | 1.54079289 | 3.76648385 | 2.3676235  | !         | 188.94  | !Torsions        |
|                              | H | 1.47324421 | 0.95379359 | 3.60964188 |           |         |                  |
| N-pentanol ROO-4 =<br>QOOH-1 | C | 0.00088503 | 0.00186379 | -0.001276  | 1968.46i  | 86.10   | 166.42           |
|                              | C | -0.0005538 | -0.0012238 | 1.51453124 | 179.98    | 284.57  | 310.28           |
|                              | O | 1.38418026 | -0.0027648 | 1.8726542  | 333.14    | 385.12  | 483.81           |
|                              | O | 1.50638783 | 0.00056748 | 3.24687009 | 526.40    | 619.18  | 635.42           |
|                              | C | -0.7289791 | 1.20911195 | 2.11342017 | 797.26    | 875.83  | 888.58           |
|                              | C | 0.16301111 | 2.45470293 | 2.19949621 | 916.46    | 960.39  | 1018.64          |
|                              | C | 1.00126958 | 2.43787651 | 3.45315059 | 1032.28   | 1084.74 | 1107.45          |
|                              | O | 0.21788423 | 2.69259879 | 4.56436794 | 1116.58   | 1170.66 | 1195.30          |
|                              | H | 0.39327633 | 0.94456193 | -0.3841269 | 1213.55   | 1236.16 | 1268.20          |
|                              | H | -1.0142724 | -0.1278296 | -0.373011  | 1306.73   | 1345.38 | 1373.12          |
|                              | H | 0.6201349  | -0.8082766 | -0.3822573 | 1377.73   | 1396.40 | 1411.60          |
|                              | H | -0.4465034 | -0.9249409 | 1.89149917 | 1418.37   | 1471.07 | 1487.56          |
|                              | H | -1.6066626 | 1.41184246 | 1.4990287  | 1499.04   | 1504.94 | 1542.79          |
|                              | H | -1.0878989 | 0.9743856  | 3.11500226 | 3060.20   | 3063.05 | 3070.96          |
|                              | H | 0.81875968 | 2.5212303  | 1.33168211 | 3074.12   | 3087.50 | 3121.60          |
|                              | H | -0.4512466 | 3.35804081 | 2.21972872 | 3130.77   | 3144.35 | 3155.75          |
|                              |   | H          | 1.40383647 | 1.20395502 | 3.5012246 | 3888.27 |                  |
|                              | H | 1.92185052 | 3.02495865 | 3.41850706 | !         | 223.59  | 361.82 !Torsions |
|                              | H | 0.76702077 | 2.72049041 | 5.35175016 |           |         |                  |
| N-pentanol ROO-4 =<br>QOOH-2 | C | -0.0118187 | -0.0091735 | 0.03665625 | 1814.78i  | 102.41  | 121.30           |
|                              | C | -0.0193682 | -0.005286  | 1.54792281 | 259.22    | 281.36  | 338.66           |
|                              | O | 1.34010656 | -0.0119519 | 1.95998056 | 467.94    | 480.46  | 509.01           |
|                              | O | 1.38147693 | -0.2102012 | 3.32869871 | 550.23    | 686.14  | 794.00           |
|                              | C | -0.689516  | 1.25623285 | 2.13620023 | 857.29    | 901.60  | 910.98           |
|                              | C | -0.4031624 | 1.44441386 | 3.6033338  | 930.54    | 1010.45 | 1050.78          |
|                              | C | -1.3241281 | 0.76751000 | 4.58458107 | 1097.26   | 1111.27 | 1134.71          |
|                              | O | -1.5210998 | -0.6003246 | 4.28840726 | 1144.40   | 1174.15 | 1218.49          |
|                              | H | 0.54449229 | 0.84982097 | -0.3380321 | 1232.36   | 1255.69 | 1301.66          |
|                              | H | -1.032937  | 0.04693831 | -0.3378743 | 1351.74   | 1372.96 | 1381.66          |
|                              | H | 0.45090578 | -0.9183168 | -0.3417664 | 1395.83   | 1417.32 | 1424.86          |
|                              | H | -0.5078607 | -0.8958577 | 1.94552673 | 1463.75   | 1488.16 | 1503.77          |
|                              | H | -0.3336271 | 2.11541514 | 1.56746955 | 1506.87   | 1568.37 | 3029.55          |
|                              | H | -1.7673371 | 1.15469365 | 1.972617   | 3043.15   | 3063.34 | 3073.56          |
|                              | H | 0.72520972 | 0.71889051 | 3.69255427 | 3094.36   | 3116.53 | 3146.19          |
|                              | H | -0.0975493 | 2.44474701 | 3.89974151 | 3150.45   | 3158.71 | 3836.32          |
|                              | H | -0.9518523 | 0.90274431 | 5.60511561 | !         | 168.65  | 210.94           |
|                              | H | -2.3155045 | 1.2294013  | 4.5388717  | !         |         | Torsions         |
|                              | H | -0.6553962 | -1.0221321 | 4.25449542 |           |         |                  |
| N-pentanol ROO-4 =<br>QOOH-3 | C | 0.0771364  | 0.03746421 | 0.03875113 | 2195.11i  | 92.01   | 170.45           |
|                              | C | -0.0273143 | 0.01288019 | 1.54956355 | 241.49    | 311.71  | 366.81           |
|                              | O | 1.25151534 | 0.08753601 | 2.18699457 | 497.30    | 512.71  | 615.11           |
|                              | O | 1.60658393 | 1.4335538  | 2.04952588 | 749.22    | 785.74  | 865.24           |
|                              | C | -0.7355251 | 1.24042138 | 2.12077949 | 905.36    | 917.73  | 958.38           |
|                              | C | -1.1322049 | 1.17811331 | 3.56677066 | 990.03    | 1026.34 | 1074.53          |
|                              | C | -1.3021513 | 2.55811586 | 4.1906764  | 1089.83   | 1118.23 | 1136.46          |
|                              | O | -0.1513756 | 3.36271575 | 4.03895473 | 1144.85   | 1173.11 | 1227.11          |

|                                                       |            |            |            |            |            |           |         |
|-------------------------------------------------------|------------|------------|------------|------------|------------|-----------|---------|
|                                                       | H          | 0.54617209 | 0.9639728  | -0.2887711 | 1256.91    | 1289.73   | 1327.17 |
|                                                       | H          | -0.9147259 | -0.0313949 | -0.4080869 | 1371.90    | 1378.30   | 1408.64 |
|                                                       | H          | 0.67613169 | -0.8014823 | -0.3102292 | 1418.45    | 1430.62   | 1470.86 |
|                                                       | H          | -0.4629722 | -0.9260994 | 1.90159295 | 1487.97    | 1502.20   | 1524.79 |
|                                                       | H          | 0.42260265 | 1.86056675 | 2.10536747 | 1744.50    | 3026.00   | 3043.43 |
|                                                       | H          | -1.424455  | 1.76499069 | 1.46233521 | 3069.13    | 3072.11   | 3073.41 |
|                                                       | H          | -2.0707611 | 0.62170323 | 3.67410903 | 3104.97    | 3140.75   | 3148.40 |
|                                                       | H          | -0.3691737 | 0.61770916 | 4.11560709 | 3159.49    | 3855.15   |         |
|                                                       | H          | -2.1096276 | 3.09813046 | 3.69427671 | ! 60.10    | 199.70    | 220.30  |
|                                                       | H          | -1.5729754 | 2.4522545  | 5.24552651 | 304.39     | !Torsions |         |
|                                                       | H          | 0.62522016 | 2.85717964 | 4.29871527 |            |           |         |
| N-pentanol ROO-4 =<br>HO <sub>2</sub> + 3-Penten-1-ol | C          | 0.0121498  | -0.0133698 | -0.0007314 | 1073.04i   | 98.17     | 148.46  |
|                                                       | C          | 0.01533442 | -0.011382  | 1.4923931  | 241.53     | 266.45    | 303.08  |
|                                                       | O          | 2.06950056 | 0.03545925 | 1.68469244 | 437.07     | 486.68    | 523.57  |
|                                                       | O          | 2.23471941 | 1.10150401 | 2.32983413 | 588.18     | 698.82    | 838.71  |
|                                                       | C          | -0.2976025 | 1.11090596 | 2.25476558 | 878.35     | 921.51    | 939.63  |
|                                                       | C          | -0.8489103 | 0.96153657 | 3.65933722 | 998.67     | 1025.55   | 1082.08 |
|                                                       | C          | -2.3643907 | 0.79264546 | 3.67017743 | 1094.17    | 1121.37   | 1158.01 |
|                                                       | O          | -2.7851714 | -0.3528052 | 2.9569887  | 1207.58    | 1246.20   | 1270.64 |
|                                                       | H          | 0.22593717 | 0.98141991 | -0.390111  | 1296.89    | 1331.65   | 1378.62 |
|                                                       | H          | -0.9715278 | -0.3166038 | -0.369168  | 1388.52    | 1401.42   | 1418.12 |
|                                                       | H          | 0.74503025 | -0.7136117 | -0.3969053 | 1423.10    | 1477.01   | 1479.87 |
|                                                       | H          | -0.0118463 | -0.9819622 | 1.97523218 | 1492.13    | 1514.30   | 1597.05 |
|                                                       | H          | 0.99933981 | 1.40355115 | 2.43656756 | 1656.76    | 3024.30   | 3053.26 |
|                                                       | H          | -0.6324786 | 1.98764369 | 1.70117249 | 3062.31    | 3103.73   | 3117.19 |
|                                                       | H          | -0.3938823 | 0.0886349  | 4.13278163 | 3119.84    | 3120.61   | 3151.52 |
|                                                       | H          | -0.591169  | 1.83057146 | 4.26811735 | 3182.60    | 3873.00   | ! 61.10 |
| H                                                     | -2.7167553 | 0.65742378 | 4.69201272 | 128.49     | 202.78     | 331.57    |         |
| H                                                     | -2.8404769 | 1.6955271  | 3.27094094 | !Torsions  |            |           |         |
| H                                                     | -2.5587583 | -0.2273975 | 2.03179611 |            |            |           |         |
| N-pentanol ROO-4 =<br>HO <sub>2</sub> + 4-Penten-1-ol | C          | -0.0060239 | -0.0150327 | 0.00804138 | 1076.69i   | 169.09    | 238.64  |
|                                                       | C          | 0.09289433 | -4.374E-06 | 1.3904838  | 261.15     | 354.17    | 424.97  |
|                                                       | O          | 2.51684058 | 0.0227121  | 0.27943958 | 443.98     | 510.75    | 553.34  |
|                                                       | O          | 2.21806869 | -0.0395674 | 1.50086711 | 624.01     | 690.76    | 773.00  |
|                                                       | C          | -0.096538  | 1.24419659 | 2.20627437 | 845.78     | 915.14    | 955.73  |
|                                                       | C          | -0.017434  | 1.0409011  | 3.71623009 | 1014.24    | 1018.86   | 1041.10 |
|                                                       | C          | 1.3492898  | 0.59339003 | 4.21880318 | 1099.44    | 1123.60   | 1157.54 |
|                                                       | O          | 2.36050577 | 1.52597827 | 3.89551348 | 1207.85    | 1225.60   | 1287.91 |
|                                                       | H          | 1.3202772  | 0.01146495 | -0.174229  | 1310.89    | 1316.14   | 1346.77 |
|                                                       | H          | -0.3318472 | 0.89270032 | -0.4887602 | 1390.92    | 1406.95   | 1410.56 |
|                                                       | H          | -0.2754543 | -0.9420279 | -0.4829333 | 1422.27    | 1452.81   | 1469.00 |
|                                                       | H          | 0.06278261 | -0.9424777 | 1.9264836  | 1479.92    | 1522.55   | 1582.05 |
|                                                       | H          | 0.6328079  | 1.99466516 | 1.89100508 | 1632.61    | 3049.31   | 3053.36 |
|                                                       | H          | -1.0769752 | 1.65450882 | 1.94934291 | 3057.36    | 3088.57   | 3098.02 |
|                                                       | H          | -0.2680792 | 1.98275536 | 4.20631509 | 3110.92    | 3137.46   | 3176.73 |
|                                                       | H          | -0.7664322 | 0.30689713 | 4.02746947 | 3226.21    | 3873.79   |         |
| H                                                     | 1.31947861 | 0.51442232 | 5.3062703  | ! 72.88    | 121.86     | 164.40    |         |
| H                                                     | 1.59906015 | -0.3981816 | 3.82981306 | 396.67     | ! Torsions |           |         |
| H                                                     | 2.75363326 | 1.25773304 | 3.06040976 |            |            |           |         |
| QOOH-0 = OH + 5-<br>Hydroxy-2-pentanone               | C          | 0.01695065 | -0.0242648 | 0.03187801 | 1035.61i   | 122.30    | 127.64  |
|                                                       | C          | -0.0141507 | 0.00761998 | 1.54087475 | 273.00     | 305.16    | 358.30  |
|                                                       | C          | 1.33550527 | 0.00552315 | 2.23069579 | 387.31     | 480.81    | 491.35  |
|                                                       | C          | 1.85454428 | -1.4249334 | 2.36845105 | 537.21     | 640.20    | 822.84  |
|                                                       | C          | 0.80281976 | -2.2739956 | 3.08423788 | 867.29     | 909.97    | 937.04  |
|                                                       | O          | -0.3889024 | -2.3179689 | 2.36748254 | 950.28     | 1018.59   | 1031.92 |

|                                             |            |            |            |                 |                          |         |                |
|---------------------------------------------|------------|------------|------------|-----------------|--------------------------|---------|----------------|
|                                             | O          | -0.7532197 | 1.06696813 | 2.08265333      | 1043.20                  | 1100.82 | 1144.68        |
|                                             | O          | -2.0543487 | 1.06996801 | 1.51808583      | 1182.91                  | 1196.64 | 1225.24        |
|                                             | H          | 0.62753745 | -0.862079  | -0.3009305      | 1240.83                  | 1266.43 | 1329.96        |
|                                             | H          | 0.45166227 | 0.90536253 | -0.3417503      | 1355.29                  | 1365.83 | 1384.82        |
|                                             | H          | -0.9820911 | -0.1347286 | -0.3795738      | 1401.90                  | 1416.42 | 1472.18        |
|                                             | H          | -0.4997967 | -1.0367103 | 1.89892952      | 1478.92                  | 1484.39 | 1494.86        |
|                                             | H          | 2.04075759 | 0.62590192 | 1.67281226      | 1501.46                  | 1642.35 | 2994.43        |
|                                             | H          | 1.21573426 | 0.44715662 | 3.22195807      | 3035.81                  | 3059.32 | 3063.49        |
|                                             | H          | 2.0474299  | -1.8579629 | 1.38523177      | 3075.94                  | 3107.63 | 3125.72        |
|                                             | H          | 2.78983971 | -1.4389566 | 2.92818178      | 3142.74                  | 3175.67 | 3813.66 !      |
|                                             | H          | 1.16160244 | -3.307988  | 3.15844909      | 69.73                    | 195.59  | 248.82         |
|                                             | H          | 0.65215514 | -1.8949263 | 4.10398667      | !Torsions                |         |                |
|                                             | H          | -2.5612329 | 0.6147707  | 2.20283306      |                          |         |                |
| QOOH-1 = OH + 5-Hydroxy-2-pentanone         | C          | -0.0295187 | 0.06691702 | 0.0807124       | 1798.30i                 | 144.46  | 181.85         |
|                                             | C          | 0.05071393 | 0.04555399 | 1.58179911      | 198.82                   | 268.01  | 356.40         |
|                                             | C          | 1.43659969 | 0.03222528 | 2.1955439       | 365.28                   | 415.88  | 463.67         |
|                                             | C          | 1.88776867 | -1.4375333 | 2.13721213      | 548.70                   | 658.17  | 764.66         |
|                                             | C          | 0.65160702 | -2.2404043 | 2.45678002      | 808.23                   | 860.39  | 886.09         |
|                                             | H          | 0.39273929 | -2.2969222 | 3.51653115      | 964.25                   | 986.04  | 1018.11        |
|                                             | O          | 0.59782728 | -3.4511849 | 1.79235925      | 1056.83                  | 1086.06 | 1124.52        |
|                                             | O          | -0.8857455 | 0.82735329 | 2.22506111      | 1189.03                  | 1227.59 | 1231.61        |
|                                             | O          | -0.5201203 | 2.23072901 | 2.02055987      | 1247.95                  | 1278.27 | 1321.98        |
|                                             | H          | 0.55301585 | -0.7501851 | -0.3460019      | 1330.94                  | 1336.79 | 1395.62        |
|                                             | H          | 0.37019125 | 1.00595388 | -0.3128461      | 1414.16                  | 1451.82 | 1480.39        |
|                                             | H          | -1.0626855 | -0.0399104 | -0.2487214      | 1481.76                  | 1498.44 | 1501.91        |
|                                             | H          | -0.1915607 | -1.2635922 | 1.98297618      | 1655.01                  | 3042.60 | 3072.01        |
|                                             | H          | 2.13316656 | 0.70169484 | 1.68920222      | 3074.36                  | 3077.54 | 3112.27        |
|                                             | H          | 1.34650976 | 0.36168926 | 3.23154834      | 3116.21                  | 3128.55 | 3140.21        |
|                                             | H          | 2.20297012 | -1.7035271 | 1.12668956      | 3840.18                  | 3893.57 |                |
|                                             | H          | 2.72127871 | -1.6477725 | 2.8072383       | ! 230.39 330.36 52.79    |         |                |
| H                                           | -0.1402709 | -3.9681818 | 2.12315608 | 95.11 !Torsions |                          |         |                |
| H                                           | -1.2305439 | 2.51243609 | 1.43234487 |                 |                          |         |                |
| QOOH-1 = OH + 5-methyl-THF-2ol              | C          | -0.0612467 | 0.31024799 | 0.19047991      | 962.1i                   | 67.53   | 97.36 182.72   |
|                                             | C          | -0.0044726 | -0.1844537 | 1.62162638      | 256.54                   | 277.25  | 317.92 411.72  |
|                                             | C          | 1.4007998  | -0.0646468 | 2.21393548      | 439.52                   | 462.16  | 498.49 566.39  |
|                                             | C          | 1.28389837 | -0.0523928 | 3.73108954      | 708.9                    | 824.97  | 882.99 914.78  |
|                                             | C          | 0.4017245  | 1.0940543  | 4.07298867      | 953.82                   | 993.24  | 1040.6 1078.77 |
|                                             | O          | -0.4780585 | 1.04223808 | 5.08848517      | 1116.37                  | 1135.45 | 1157.66        |
|                                             | H          | 0.82332761 | -0.9794094 | 4.08376407      | 1210.19                  | 1239.26 | 1251.01        |
|                                             | H          | 2.26631288 | 0.02834277 | 4.20750187      | 1318.51                  | 1332.32 | 1372.58        |
|                                             | H          | 2.02973531 | -0.877714  | 1.8496617       | 1374.73                  | 1393.56 | 1409.48        |
|                                             | H          | 1.85342103 | 0.87320778 | 1.88097142      | 1461.75                  | 1481.54 | 1486.03        |
|                                             | H          | -1.0563561 | 0.16882538 | -0.2212935      | 1500.22                  | 1509.7  | 3032.3 3039.56 |
|                                             | H          | 0.18896186 | 1.37179369 | 0.16034987      | 3058.01                  | 3063.59 | 3082.72        |
|                                             | H          | 0.6592435  | -0.2323633 | -0.4235919      | 3112.63                  | 3130.14 | 3172.18        |
|                                             | H          | -0.3238084 | -1.2304005 | 1.66951761      | 3207.87                  | 3824.79 | 3867.38        |
|                                             | H          | 0.7313538  | 2.1025842  | 3.86348427      | ! 139.06 223.65 379.51 ! |         |                |
|                                             | O          | -0.8796839 | 0.55703018 | 2.47508586      | Torsions                 |         |                |
|                                             | O          | -2.3422701 | 0.08075699 | 1.9092393       |                          |         |                |
| H                                           | -2.7657256 | 0.94156239 | 2.00107021 |                 |                          |         |                |
| H                                           | -0.9217868 | 0.18598469 | 5.07120594 |                 |                          |         |                |
| QOOH-2 = OH + (4-methyloxetan-2-yl)methanol | C          | 0.15803556 | 0.70338753 | 0.55795944      | 1097.26i                 | 60.21   | 98.05 188.38   |
|                                             | C          | 0.00265683 | -0.149192  | 1.79496188      | 232.72                   | 319.2   | 349.55 421.71  |
|                                             | C          | 1.31693601 | -0.5311123 | 2.48889245      | 442.99                   | 513.89  | 636.34 758.75  |
|                                             | C          | 1.15035101 | 0.28478101 | 3.73813062      | 842.81                   | 885.5   | 929.85 953.14  |

|                                              |              |              |              |              |         |          |               |
|----------------------------------------------|--------------|--------------|--------------|--------------|---------|----------|---------------|
|                                              | C            | 1.67025275   | 1.67692356   | 3.84325139   | 1004.7  | 1075.87  | 1102.15       |
|                                              | O            | 0.76968062   | 2.51283829   | 4.53242233   | 1119.96 | 1125.68  | 1137.56       |
|                                              | H            | 0.88055533   | -0.2006519   | 4.66554713   | 1160.85 | 1212.06  | 1236.93       |
|                                              | H            | 1.89055257   | 2.06413936   | 2.84177726   | 1285.2  | 1315.31  | 1346.94       |
|                                              | H            | 1.38054792   | -1.5959756   | 2.69834645   | 1383.21 | 1403.12  | 1415.13       |
|                                              | H            | 2.19141658   | -0.2339529   | 1.90737565   | 1443.6  | 1480.09  | 1493.31       |
|                                              | H            | -0.8129163   | 1.03968708   | 0.20354945   | 1499.48 | 1506.35  | 3023.71       |
|                                              | H            | 0.77597801   | 1.57568073   | 0.77445822   | 3058.33 | 3064.94  | 3073.72       |
|                                              | H            | 0.64315607   | 0.1226899    | -0.2279866   | 3088.92 | 3134.39  | 3143.42       |
|                                              | H            | 2.60557973   | 1.69389688   | 4.41223201   | 3168.1  | 3209.53  | 3831.34       |
|                                              | O            | -0.5835727   | 0.59665869   | 2.89286592   | 3859.46 |          |               |
|                                              | H            | -0.6392416   | -1.0065151   | 1.59144078   | !       | 137.27   | 259.73 283.77 |
|                                              | O            | -2.0791035   | 0.97891889   | 2.30063556   | 497.29  | !        | Torsions      |
|                                              | H            | -2.5741878   | 0.59817636   | 3.03532151   |         |          |               |
|                                              | H            | -0.0795766   | 2.41677344   | 4.08558916   |         |          |               |
| QOOH-3 = HO <sub>2</sub> + 3-Penten-1-ol     | C            | 0.00239958   | 0.00125709   | -0.00274575  | 670.57i | 154.71   | 178.28        |
|                                              | C            | 0.00165012   | -0.00526931  | 1.49396613   | 271.72  | 311.07   | 344.23        |
|                                              | C            | 1.16862193   | -0.00259766  | 2.21948275   | 363.80  | 479.86   | 511.53        |
|                                              | H            | 2.09669035   | 0.228625945  | 1.70212909   | 758.24  | 869.08   | 898.29        |
|                                              | C            | 1.22561387   | -0.08923378  | 3.70700160   | 929.49  | 989.88   | 1019.64       |
|                                              | C            | 1.84942999   | 1.171435233  | 4.31150279   | 1030.95 | 1094.21  | 1102.01       |
|                                              | O            | 1.11918943   | 2.345180629  | 3.99891359   | 1118.18 | 1163.28  | 1219.08       |
|                                              | O            | -0.60419505  | 1.783934343  | 1.83624039   | 1228.18 | 1290.88  | 1311.54       |
|                                              | O            | -1.38828606  | 1.742478565  | 2.96287261   | 1371.46 | 1395.69  | 1410.43       |
|                                              | H            | 0.89163377   | 0.496940519  | -0.39032505  | 1425.44 | 1469.99  | 1482.02       |
|                                              | H            | -0.87860622  | 0.517297191  | -0.37801952  | 1494.75 | 1511.24  | 1522.21       |
|                                              | H            | -0.01208929  | -1.02102395  | -0.38364818  | 1579.36 | 3035.30  | 3040.44       |
|                                              | H            | -0.887658876 | -0.39738200  | 1.9733908228 | 3067.47 | 3103.33  | 3126.41       |
|                                              | H            | 0.222283489  | -0.23480742  | 4.1110951176 | 3132.83 | 3143.00  | 3156.41       |
|                                              | H            | 1.834790539  | -0.94363431  | 4.0204403009 | 3183.15 | 3637.84  | 3771.88       |
|                                              | H            | 1.863473670  | 1.09951000   | 5.3976224862 | !       | 95.84    | 136.89 185.97 |
|                                              | H            | 2.884586279  | 1.26911289   | 3.9681703254 | 237.04  | 585.09   | 661.51 !      |
| H                                            | 1.059525007  | 2.41807051   | 3.0358515192 | Torsions     |         |          |               |
| H                                            | -0.787842508 | 2.06747453   | 3.6580280623 |              |         |          |               |
| QOOH-3 = OH + 2-(3-methyloxiran-2-yl)ethanol | C            | -0.0949763   | -0.0795021   | 0.05922951   | 943.82i | 101.03   | 200.08        |
|                                              | C            | 0.0809583    | 0.03467175   | 1.55043724   | 238.75  | 282.62   | 304.07        |
|                                              | C            | 1.4360673    | -0.0239198   | 2.12594839   | 379.73  | 439.89   | 497.65        |
|                                              | H            | 2.25524164   | 0.31444683   | 1.5068125    | 532.58  | 642.06   | 708.84        |
|                                              | C            | 1.66399509   | -0.433219    | 3.53503272   | 815.62  | 897.67   | 907.81        |
|                                              | C            | 0.94557028   | 0.44289688   | 4.58426657   | 923.25  | 1006.74  | 1033.27       |
|                                              | O            | -0.4520400   | 0.32096256   | 4.54789774   | 1076.56 | 1117.02  | 1123.07       |
|                                              | O            | 0.11129039   | 1.3556302    | 2.0186762    | 1148.82 | 1200.87  | 1216.26       |
|                                              | O            | -1.4998325   | 1.89429733   | 2.09440496   | 1270.25 | 1301.89  | 1328.95       |
|                                              | H            | 0.67647049   | 0.49317985   | -0.4554211   | 1365.18 | 1404.19  | 1412.50       |
|                                              | H            | -1.0700318   | 0.31972557   | -0.215247    | 1419.15 | 1465.81  | 1477.24       |
|                                              | H            | -0.0382722   | -1.1206175   | -0.2573968   | 1494.78 | 1501.20  | 1510.20       |
|                                              | H            | -0.6389405   | -0.5619308   | 2.1152962    | 3038.42 | 3059.49  | 3068.10       |
|                                              | H            | 1.29642851   | -1.4552166   | 3.67525114   | 3083.02 | 3110.54  | 3114.30       |
|                                              | H            | 2.7313925    | -0.4272712   | 3.75659733   | 3145.77 | 3154.39  | 3210.86       |
|                                              | H            | 1.26945317   | 0.10557254   | 5.56941753   | 3784.35 | 3849.88  |               |
|                                              | H            | 1.26108398   | 1.48090507   | 4.45733478   | !       | 76.48    | 179.45 216.04 |
| H                                            | -0.8034056   | 0.92741385   | 3.8821339    | 253.59       | !       | Torsions |               |
| H                                            | -1.2897793   | 2.82739792   | 1.96391122   |              |         |          |               |

## Rate Constant Calculation and Modeling Details:

### A) Updated Rate Constants in Chemkin-PLOG Format:

**Table S17.** Reaction rate constants and updated thermo calculated in this work for the n-butanol ROO and QOOH decompositions. A species glossary is given in the supplemental material as an excel document.

```
!! Final N-butanol Lockwood Rates 11-18-21!  
!  
! ROO1 Decomposition Rates  
!  
PC4H8OH-1O2=NC3H7CHO+HO2 1.0 0.0 0.0 !well skipping over the complex so no HP rates  
PLOG/ 0.100 2.019E+43 -10.604 18999.5/  
PLOG/ 1.000 5.585E+36 -8.150 18370.3/  
PLOG/ 10.000 6.713E+28 -5.363 17157.6/  
PLOG/ 100.000 2.504E+24 -3.795 16768.0/  
PC4H8OH-1O2=>O2+PC4H8OH-1 7.914E+23 -2.477 39847.7  
PLOG/ 0.100 1.688E+129 -41.274 61279.9/  
PLOG/ 1.000 8.667E+49 -12.577 43656.0/  
PLOG/ 10.000 1.391E+46 -10.228 44399.5/  
PLOG/ 100.000 1.087E+35 -6.166 42695.9/  
O2+PC4H8OH-1=>PC4H8OH-1O2 1.274E+12 0.283 116.9  
PLOG/ 0.100 3.799E-30 11.222 -10994.2/  
PLOG/ 1.000 1.935E+40 -10.522 4475.3/  
PLOG/ 10.000 6.660E+35 -7.947 5068.5/  
PLOG/ 100.000 2.140E+24 -3.753 3291.8/  
O2+PC4H8OH-1=NC3H7CHO+HO2 1.0 0.0 0.0 !well skipping over the complex so no HP rates  
PLOG/ 0.100 3.169E+20 -2.543 2046.3/  
PLOG/ 0.100 4.836E+32 -5.872 11186.3/  
PLOG/ 1.000 3.787E+20 -2.563 2093.3/  
PLOG/ 1.000 6.490E+32 -5.909 11285.0/  
PLOG/ 10.00 1.766E+22 -3.087 3083.2/  
PLOG/ 10.00 2.706E+31 -5.502 10263.1/  
PLOG/ 100.0 1.023E+18 -1.829 2729.4/  
PLOG/ 100.0 3.951E+31 -5.435 12245.1/  
!  
!  
!ROO2 & Subsequent QOOH Decomp:  
!  
!  
PC4H8OH-2O2=SQC4H7OHP-4 8.656E-02 3.648 17799.4  
PLOG/ 0.100 1.215E-04 4.207 15799.0/  
PLOG/ 1.000 2.214E-06 4.988 15978.9/  
PLOG/ 10.000 4.242E-06 4.988 16367.3/
```

PLOG/ 100.000 3.578E+06 1.211 20063.4/  
PC4H8OH-2O2=C4H7OH-2OOH-1 1.319E-09 6.153 16809.1  
PLOG/ 0.100 5.878E+08 -1.267 15607.8/  
PLOG/ 1.000 3.215E-06 3.963 13709.0/  
PLOG/ 10.000 1.228E-16 7.864 12660.0/  
PLOG/ 100.000 1.270E-18 8.817 13243.8/  
PC4H8OH-2O2=>PC4H8OH-2+O2 3.240E+24 -2.557 37791.4  
PLOG/ 0.100 8.185E+64 -15.954 47842.2/  
PLOG/ 1.000 8.358E+53 -12.205 45511.1/  
PLOG/ 10.000 9.788E+43 -8.880 43183.0/  
PLOG/ 100.000 5.771E+37 -6.804 41695.6/  
PC4H8OH-2+O2=>PC4H8OH-2O2 1.0 0.0 0.0  
PLOG/ 0.100 5.047E+54 -14.275 8833.4/  
PLOG/ 0.100 5.782E+79 -21.458 21226.6/  
PLOG/ 1.000 1.601E+45 -10.943 7117.5/  
PLOG/ 1.000 3.593E+75 -19.733 22179.3/  
PLOG/ 10.000 3.658E+36 -7.952 5430.0/  
PLOG/ 10.000 5.525E+68 -17.249 22297.5/  
PLOG/ 100.000 7.284E+29 -5.651 4066.9/  
PLOG/ 100.000 3.333E+60 -14.411 21770.4/  
PC4H8OH-2O2=OH+CH2O+C2H5CHO 1.0 0.0 0.0 !well skipping  
PLOG/ 0.100 5.972E+51 -12.692 41483.3/  
PLOG/ 1.000 8.617E+40 -9.063 38932.9/  
PLOG/ 10.000 1.125E+33 -6.438 37033.0/  
PLOG/ 100.000 8.999E+29 -5.385 36388.9/  
PC4H8OH-2O2=C4H7OHCYO1-2+OH 1.0 0.0 0.0 !well skipping  
PLOG/ 0.100 2.291E+23 -4.249 26500.4/  
PLOG/ 1.000 4.390E+20 -3.166 27038.3/  
PLOG/ 10.000 4.272E+21 -3.237 29214.1/  
PLOG/ 100.000 8.524E+18 -2.188 30516.1/  
SQC4H7OHP-4=>PC4H8OH-2+O2 1.0 0.0 0.0 !well skipping  
PLOG/ 0.100 4.887E-75 29.791 2191.5/  
PLOG/ 1.000 5.943E+03 3.314 18694.6/  
PLOG/ 10.000 2.692E+10 1.254 21607.4/  
PLOG/ 100.000 5.112E+22 -2.763 26355.6/  
PC4H8OH-2+O2=>SQC4H7OHP-4 1.0 0.0 0.0 ! well skipping  
PLOG/ 10.000 1.140E+00 3.270 153.9/  
PLOG/ 10.000 1.143E+16 -1.401 8387.4/  
PLOG/ 100.000 9.120E+06 0.878 2812.2/  
PLOG/ 100.000 2.591E+45 -10.151 23978.4/  
SQC4H7OHP-4=CH2O+OH+C2H5CHO 1.0 0.0 0.0 !well skipping  
PLOG/ 0.100 2.265E-83 31.221 -3844.0/  
PLOG/ 1.000 1.484E+07 1.018 15359.9/  
PLOG/ 10.000 5.654E+11 -0.095 17498.3/  
PLOG/ 100.000 1.720E+18 -2.034 19979.8/  
SQC4H7OHP-4=CY(CCCO)COH+OH 3.223E+13 -0.461 16084.2  
PLOG/ 0.100 1.543E-04 3.892 9039.1/  
PLOG/ 1.000 3.372E+18 -2.642 15912.3/  
PLOG/ 10.000 3.555E+16 -1.576 16498.5/  
PLOG/ 100.000 6.446E+15 -1.218 16690.8/  
C4H7OH-2OOH-1=C4H7OHCYO1-2+OH 4.193E+12 0.125 10258.6  
PLOG/ 0.100 2.944E+36 -8.698 13319.7/  
PLOG/ 1.000 4.610E+34 -7.680 14036.8/  
PLOG/ 10.000 1.509E+27 -4.892 13172.1/  
PLOG/ 100.000 2.897E+19 -2.188 11777.4/  
C4H7OH-2OOH-1=C4H7O-2O+H2O 8.842E+05 1.596 7226.3

PLOG/ 0.100 5.122E+17 -3.134 7253.2/  
PLOG/ 1.000 1.683E+13 -1.316 7205.8/  
PLOG/ 10.000 3.636E+08 0.477 6893.0/  
PLOG/ 100.000 3.130E+05 1.630 6636.7/

!  
!  
!  
!  
!

!ROO3 & Subsequent QOOH Decomp:

PC4H8OH-3O2=C4H7OH-3OOH-1 1.585E+06 1.646 14594.2

PLOG/ 0.100 1.341E+10 0.027 14435.2/  
PLOG/ 1.000 7.695E+06 1.286 14284.4/  
PLOG/ 10.000 1.788E+11 -0.021 15920.9/  
PLOG/ 100.000 3.187E+10 0.269 15914.9/

PC4H8OH-3O2=>PC4H8OH-3+O2 5.917E+29 -4.038 39548.8

PLOG/ 0.100 4.668E+69 -17.461 48834.9/  
PLOG/ 1.000 8.279E+61 -14.662 47702.3/  
PLOG/ 10.000 2.484E+53 -11.742 45940.7/  
PLOG/ 100.000 7.335E+43 -8.583 43580.5/

PC4H8OH-3+O2=>PC4H8OH-3O2 5.326E+13 -0.219 357.6

PLOG/ 0.100 1.041E+56 -14.765 9059.8/  
PLOG/ 0.100 7.780E+79 -21.732 20274.2/  
PLOG/ 1.000 4.174E+51 -13.099 8623.5/  
PLOG/ 1.000 8.764E+75 -19.997 21412.6/  
PLOG/ 10.000 1.490E+35 -7.456 5212.7/  
PLOG/ 10.000 1.441E+76 -19.713 23978.0/  
PLOG/ 100.000 4.935E+32 -6.570 4828.0/  
PLOG/ 100.000 3.417E+62 -15.137 21450.8/

PC4H8OH-3O2=H2O+C4Y1-3OR 1.0 0.0 0.0 !well skipping no HP rates

PLOG/ 0.100 3.387E+33 -7.100 25595.7/  
PLOG/ 1.000 3.140E+22 -3.421 24275.3/  
PLOG/ 10.000 2.115E+16 -1.596 23361.2/  
PLOG/ 100.000 1.147E+19 -2.665 25004.7/

C4H7OH-3OOH-1=>PC4H8OH-3+O2 1.0 0.0 0.0 !well skipping

PLOG/ 0.100 6.612E+11 0.915 26372.2/  
PLOG/ 1.000 7.872E+30 -5.108 32136.7/  
PLOG/ 10.000 3.735E+39 -7.753 36288.7/  
PLOG/ 100.000 3.652E+33 -5.868 35928.0/

PC4H8OH-3+O2=>C4H7OH-3OOH-1 1.0 0.0 0.0 !well skipping

PLOG/ 1.000 1.271E+26 -4.782 3967.4/  
PLOG/ 1.000 7.347E+35 -7.556 9650.3/  
PLOG/ 10.000 1.296E+30 -6.061 6171.3/  
PLOG/ 10.000 3.107E+63 -15.762 22804.1/  
PLOG/ 100.000 2.841E+13 -0.672 2969.5/  
PLOG/ 100.000 6.994E+59 -14.382 25697.5/

C4H7OH-3OOH-1=H2O+C4Y1-3OR 3.844E-03 3.754 2892.4

PLOG/ 0.100 2.823E+04 1.209 3672.4/  
PLOG/ 1.000 8.674E-05 4.169 2056.3/  
PLOG/ 10.000 1.412E-03 3.868 2755.0/  
PLOG/ 100.000 6.886E+00 2.744 4099.3/

C4H7OH-3OOH-1=OH+CH3CHO+C2H3OH 1.279E+12 0.209 24453.8

PLOG/ 0.100 8.709E-22 10.287 14400.0/  
PLOG/ 1.000 2.732E+20 -3.005 25113.7/  
PLOG/ 10.000 7.810E+20 -2.765 26428.8/  
PLOG/ 100.000 1.113E+17 -1.387 25864.1/

C4H7OH-3OOH-1=OH+C4H7OHCY01-3 5.042E+13 -0.535 18181.4

PLOG/ 0.100 1.816E+07 0.875 14543.7/  
 PLOG/ 1.000 1.017E+22 -3.534 19409.8/  
 PLOG/ 10.000 2.381E+19 -2.443 19495.2/  
 PLOG/ 100.000 6.405E+16 -1.535 19079.2/  
 C4H7OH-3OOH-1=CC(O)CCO+OH 1.281E-03 4.252 9750.7  
 PLOG/ 0.100 9.548E-25 10.360 1196.5/  
 PLOG/ 1.000 7.159E-17 8.192 4665.9/  
 PLOG/ 10.000 1.443E-06 5.077 8383.8/  
 PLOG/ 100.000 3.788E+00 3.139 10788.8/  
 !  
 !  
 ! ROO4 & Subsequent QOOH Decomposition  
 !  
 !  
 PC4H8OH-4O2=C4H7OH-4OOH-1 7.353E-04 3.780 11442.9  
 PLOG/ 0.100 2.137E-05 4.206 10733.4/  
 PLOG/ 1.000 3.451E-05 4.177 10938.6/  
 PLOG/ 10.000 1.215E+03 1.794 13314.3/  
 PLOG/ 100.000 6.427E+01 2.219 13015.6/  
 PC4H8OH-4O2=C4H7OH-4OOH-2 7.843E-09 5.418 12350.7  
 PLOG/ 0.100 6.263E+14 -2.842 15714.2/  
 PLOG/ 1.000 6.711E+04 0.792 14330.6/  
 PLOG/ 10.000 8.720E-05 3.928 12802.5/  
 PLOG/ 100.000 4.486E-11 6.084 11509.1/  
 PC4H8OH-4O2=>O2+PC4H8OH-4 1.151E+19 -1.247 34587.8  
 PLOG/ 0.100 1.660E+50 -11.484 42702.3/  
 PLOG/ 1.000 1.809E+40 -8.136 40417.8/  
 PLOG/ 10.000 7.348E+33 -5.998 38927.3/  
 PLOG/ 100.000 7.907E+27 -4.053 37315.4/  
 O2+PC4H8OH-4=>PC4H8OH-4O2 1.507E+12 0.169 -3.1  
 PLOG/ 0.100 1.229E+48 -12.003 7922.5/  
 PLOG/ 0.100 1.930E+78 -20.705 23095.9/  
 PLOG/ 1.000 1.059E+38 -8.536 5899.7/  
 PLOG/ 1.000 2.261E+70 -17.871 22740.6/  
 PLOG/ 10.000 2.013E+31 -6.220 4560.2/  
 PLOG/ 10.000 5.915E+62 -15.207 22559.8/  
 PLOG/ 100.000 8.294E+24 -4.060 3143.2/  
 PLOG/ 100.000 1.246E+51 -11.427 20046.7/  
 C4H7OH-4OOH-1=>O2+PC4H8OH-4 1.0 0.0 0.0 !well skipping  
 PLOG/ 0.100 2.221E+24 -3.770 27638.7/  
 PLOG/ 1.000 1.271E+17 -1.378 27114.0/  
 PLOG/ 10.000 1.394E+22 -3.087 29822.6/  
 PLOG/ 100.000 1.444E+11 0.184 27195.7/  
 O2+PC4H8OH-4=>C4H7OH-4OOH-1 1.0 0.0 0.0 !well skipping  
 PLOG/ 1.000 1.060E+17 -2.216 3514.4/  
 PLOG/ 1.000 3.752E+52 -12.764 19864.8/  
 PLOG/ 10.000 3.578E+08 0.459 2364.2/  
 PLOG/ 10.000 4.684E+62 -15.508 29307.4/  
 PLOG/ 100.000 2.638E+04 1.534 1730.2/  
 PLOG/ 100.000 1.506E+39 -8.311 22710.2/  
 C4H7OH-4OOH-1=C4H7OHCYO1-4+OH 4.423E+05 1.373 8801.5  
 PLOG/ 0.100 2.483E+14 -1.577 10804.0/  
 PLOG/ 1.000 1.817E+09 0.181 9727.4/  
 PLOG/ 10.000 4.035E+07 0.745 9381.5/  
 PLOG/ 100.000 1.439E+06 1.210 8958.9/  
 C4H7OH-4OOH-2=CY(CCCO)COH+OH 2.888E+12 0.437 19917.7



```

PLOG/ 0.100 4.989E+14 -2.465 15064.5/
PLOG/ 1.000 3.082E+33 -7.639 21800.4/
PLOG/ 10.000 6.253E+29 -5.714 22799.8/
PLOG/ 100.000 1.651E+17 -1.263 20607.2/
C4H7OH-4OOH-2=OH+CH2O+C3H5OH 2.854E+16 -0.511 28873.6
PLOG/ 0.100 6.346E-54 20.834 13293.3/
PLOG/ 1.000 3.757E+35 -8.687 29884.0/
PLOG/ 10.000 5.351E+40 -9.292 32749.3/
PLOG/ 100.000 2.417E+27 -4.313 30957.8/
!
!
!
! Updated thermo for new species not previously in mechanism. Estimated using RMG (Reaction Mechanism
Generator)
!
!
C4H7O-2O      C 4H 7O 2 G 100.000 5000.000 1058.65 1
1.06252120E+01 2.37944840E-02-9.55578605E-06 1.77797221E-09-1.24965013E-13 2
-2.11411408E+04-2.23361290E+01 1.78185997E+00 4.07274573E-02-1.01967347E-05 3
-1.25234239E-08 6.72487245E-12-1.83452017E+04 2.51937987E+01 4
C4Y1-3OR      C 4H 7O 2 G 100.000 5000.000 1260.66 1
7.62973590E+00 3.05137232E-02-1.35884872E-05 2.57256707E-09-1.79175557E-13 2
-2.17218129E+04-7.62305377E+00 1.90572393E+00 4.86758726E-02-3.51990075E-05 3
1.40008421E-08-2.44552781E-12-2.02786220E+04 2.13178171E+01 4
CC(O)CCO      C 4H 8O 2 G 100.000 5000.000 1126.09 1
7.24007111E+00 3.30850383E-02-1.46258211E-05 2.76720370E-09-1.93081454E-13 2
-4.92173629E+04-5.07633596E+00 1.74065590E+00 5.26193902E-02-4.06461494E-05 3
1.81715764E-08-3.61292730E-12-4.79787831E+04 2.21082827E+01 4

```

**Table S18.** Reaction rate constants calculated in this work for the n-pentanol ROO and QOOH decompositions. A species glossary is given in the supplemental material as an excel document.

```

! Lockwood Updated N-pentanol ROO & QOOH Rates 11-17-2021
!
! ROO1 Rates
!
C5H10OH-1O2=HO2+PC4H9CHO 1.0 0 0 ! Well skipping, no HP rates.
PLOG/ 0.100 4.912E+35 -8.137 17182.6/
PLOG/ 1.000 2.245E+23 -3.892 14662.1/
PLOG/ 10.000 5.528E+18 -2.311 13718.2/
PLOG/ 100.000 3.124E+17 -1.826 13864.5/
C5H10OH-1O2=>C5H10OH11+O2 2.449E+25 -3.034 39734.5
PLOG/ 0.100 1.159E+49 -12.896 42374.7/
PLOG/ 1.000 2.893E+55 -13.689 45428.6/
PLOG/ 10.000 7.194E+41 -8.576 43598.9/
PLOG/ 100.000 8.444E+33 -5.801 42120.7/
C5H10OH11+O2=>C5H10OH-1O2 3.089E+12 0.162 5.2
PLOG/ 0.100 7.319E+39 -10.944 3485.6/
PLOG/ 1.000 4.995E+44 -11.197 6236.6/
PLOG/ 10.000 1.160E+32 -6.367 4845.2/
PLOG/ 100.000 1.381E+21 -2.622 2584.2/
C5H10OH11+O2=HO2+PC4H9CHO 1.0 0.0 0.0 ! Well skipping, no HP rates.
PLOG/ 0.100 8.528E+22 -3.329 2480.5/
PLOG/ 0.100 6.721E+36 -7.129 12732.7/
PLOG/ 1.000 2.284E+24 -3.736 3306.7/

```

PLOG/ 1.000 6.711E+36 -7.128 12792.3/  
PLOG/ 10.00 2.878E+24 -3.853 4090.4/  
PLOG/ 10.00 1.231E+37 -7.151 13226.9/  
PLOG/ 100.0 6.673E+09 0.842 1298.7/  
PLOG/ 100.0 1.924E+44 -9.284 19708.5/

!  
!  
!  
!  
!

! ROO2 Rates

C5H10OH-2O2=>O2+C5H10OH12 2.743E+22 -2.097 38053.0

PLOG/ 0.100 6.010E+54 -12.718 46427.8/  
PLOG/ 1.000 1.641E+45 -9.502 44251.8/  
PLOG/ 10.000 2.494E+36 -6.596 42014.9/  
PLOG/ 100.000 1.501E+31 -4.886 40655.4/

O2+C5H10OH12=>C5H10OH-2O2 1.0 0.0 0.0

PLOG/ 0.10 1.302E+23 -4.125 -0.3/  
PLOG/ 0.10 1.568E+71 -18.525 19110.2/  
PLOG/ 1.000 5.084E+40 -9.251 6752.3/  
PLOG/ 1.000 7.795E+83 -21.864 28807.9/  
PLOG/ 10.000 3.467E+31 -6.164 4669.2/  
PLOG/ 10.000 3.557E+70 -17.456 26224.7/  
PLOG/ 100.000 6.129E+25 -4.244 3301.7/  
PLOG/ 100.000 4.674E+51 -11.540 20008.9/

C5H10OH-2O2=C5H9OH-2OOH-1 8.287E-12 6.616 16058.0

PLOG/ 0.100 5.163E-25 10.477 10850.6/  
PLOG/ 1.000 3.250E-21 9.469 12684.1/  
PLOG/ 10.000 9.940E-06 4.614 17605.2/  
PLOG/ 100.000 2.163E-05 4.568 17971.8/

C5H10OH-2O2=C5H9OH-2OOH-4 2.307E-01 3.330 15359.3

PLOG/ 1.000 3.987E-05 4.363 13661.8/  
PLOG/ 10.000 5.299E-06 4.768 13828.0/  
PLOG/ 100.000 9.595E+03 1.856 16739.0/

C5H10OH-2O2=C5H9OH-2OOH-5 5.603E-04 3.910 16993.7

PLOG/ 0.100 6.984E+00 2.697 18093.5/  
PLOG/ 1.000 1.145E+04 1.730 19215.1/  
PLOG/ 10.000 6.941E+11 -0.733 21594.4/  
PLOG/ 100.000 7.853E+09 -0.087 21123.2/

C5H10OH-2O2=CH2O+OH+NC3H7CHO 1.0 0.0 0.0 ! well skipping over QOOH-0 well

PLOG/ 0.100 2.665E+38 -8.523 32832.2/  
PLOG/ 1.000 2.227E+33 -6.848 31554.6/  
PLOG/ 10.000 1.729E+29 -5.510 30449.0/  
PLOG/ 100.000 9.042E+26 -4.768 29820.3/

C5H9OH-2OOH-1=C5H9O1-2OH-1+OH 9.473E+12 -0.797 9651.1

PLOG/ 0.100 1.028E+25 -4.921 12160.2/  
PLOG/ 1.000 3.034E+17 -2.311 10691.1/  
PLOG/ 10.000 2.603E+14 -1.269 10029.1/  
PLOG/ 100.000 1.873E+14 -1.210 10043.1/

C5H9OH-2OOH-1=HO2+C5H9OH1-1 1.012E+10 -0.171 13784.2

PLOG/ 0.100 1.233E+32 -7.726 18481.2/  
PLOG/ 1.000 4.001E+19 -3.374 16094.7/  
PLOG/ 10.000 7.558E+12 -1.110 14551.5/  
PLOG/ 100.000 1.192E+12 -0.832 14400.8/

C5H9OH-2OOH-4=>O2+C5H10OH12 1.0 0.0 0.0 ! well skipping

PLOG/ 1.000 4.560E-14 8.956 18613.8/  
PLOG/ 10.000 7.052E-02 5.075 22762.2/  
PLOG/ 100.000 1.101E+17 -0.884 28939.0/

O2+C5H10OH12=>C5H9OH-2OOH-4 1.0 0.0 0.0 ! well skipping  
PLOG/ 10.000 2.984E-07 5.509 -1050.8/  
PLOG/ 10.000 3.944E-27 12.522 -0.9/  
PLOG/ 100.000 3.742E-02 3.639 881.8/  
PLOG/ 100.000 4.722E+29 -5.243 19230.8/  
C5H9OH-2OOH-4=CH2O+OH+NC3H7CHO 1.0 0.0 0.0 ! well skipping  
PLOG/ 1.000 1.356E+25 -4.730 18053.6/  
PLOG/ 10.000 1.247E+23 -3.636 18704.0/  
PLOG/ 100.000 2.030E+24 -3.878 19687.3/  
C5H9OH-2OOH-4=OH+C5H9O2-4OH-1 3.412E+13 -0.668 14951.8  
PLOG/ 1.000 5.588E+23 -4.514 16130.1/  
PLOG/ 10.000 1.758E+18 -2.321 15825.2/  
PLOG/ 100.000 2.448E+16 -1.601 15718.2/  
C5H9OH-2OOH-5=CH2O+OH+NC3H7CHO 1.0 0.0 0.0 ! well skipping  
PLOG/ 0.100 2.901E+26 -5.352 14115.3/  
PLOG/ 1.000 2.641E+21 -3.451 13556.0/  
PLOG/ 10.000 9.962E+16 -1.942 12605.6/  
PLOG/ 100.000 6.489E+14 -1.218 12110.0/  
C5H9OH-2OOH-5=>O2+C5H10OH12 1.0 0 0 ! well skipping  
PLOG/ 0.100 1.580E-01 4.485 19000.8/  
PLOG/ 1.000 8.897E+06 2.054 22221.9/  
PLOG/ 10.000 2.564E+19 -2.051 26832.0/  
PLOG/ 100.000 8.089E+11 0.122 25320.1/  
O2+C5H10OH12=>C5H9OH-2OOH-5 1.0 0 0 ! well skipping  
PLOG/ 1.000 3.735E-01 3.418 240.7/  
PLOG/ 1.000 1.168E+07 1.349 5079.6/  
PLOG/ 10.000 6.686E+05 1.239 2709.1/  
PLOG/ 10.000 2.854E+47 -10.887 24293.9/  
PLOG/ 100.000 2.502E-02 3.420 1315.7/  
PLOG/ 100.000 3.386E+28 -5.177 18844.4/  
C5H9OH-2OOH-5=OH+C5H9O2-5OH-1 1.346E+07 0.870 11174.9  
PLOG/ 0.100 5.487E+22 -4.606 14143.8/  
PLOG/ 1.000 2.257E+16 -2.220 13370.0/  
PLOG/ 10.000 1.019E+12 -0.715 12517.9/  
PLOG/ 100.000 1.618E+10 -0.114 12086.8/  
!  
!  
! ROO3 Rates  
!  
C5H10OH-3O2=C5H9OH-3OOH-1 2.856E+04 2.219 15174.2  
PLOG/ 0.100 3.353E+01 2.978 13700.9/  
PLOG/ 1.000 5.608E+00 3.343 13870.4/  
PLOG/ 10.000 1.877E+12 -0.341 17228.6/  
PLOG/ 100.000 6.809E+10 0.157 16960.9/  
C5H10OH-3O2=C5H9OH-3OOH-5 3.016E+02 2.772 18660.3  
PLOG/ 1.000 1.021E+04 2.022 18172.2/  
PLOG/ 10.000 1.144E-05 5.114 16387.1/  
PLOG/ 100.000 6.273E+11 -0.256 21195.2/  
C5H10OH-3O2=>C5H10OH13+O2 1.665E+28 -3.431 39175.6  
PLOG/ 0.100 4.397E+69 -17.315 48899.7/  
PLOG/ 1.000 6.876E+60 -14.233 47283.1/  
PLOG/ 10.000 7.041E+58 -13.407 47434.8/  
PLOG/ 100.000 1.145E+44 -8.563 43556.3/  
C5H10OH-3O2=H2O+NC5KET13O 1.0 0.0 0.0 ! well skipping, no HP rates  
PLOG/ 0.010 8.661E+33 -7.472 24614.9/  
PLOG/ 0.100 4.639E+15 -1.373 21364.6/

PLOG/ 1.000 9.344E-02 3.983 17966.2/  
 PLOG/ 10.000 3.004E+40 -9.750 29772.1/  
 PLOG/ 100.000 4.871E+09 -0.055 21745.8/  
 C5H10OH13+O2=>C5H10OH-3O2 3.003E+12 0.166 0.6  
 PLOG/ 1.000 2.081E+43 -10.632 5393.9/  
 PLOG/ 1.000 4.441E+73 -19.388 19731.9/  
 PLOG/ 10.000 3.031E+21 -3.485 -11.1/  
 PLOG/ 10.000 3.726E+56 -13.859 14341.3/  
 PLOG/ 100.000 4.902E+32 -6.635 4627.4/  
 PLOG/ 100.000 3.955E+65 -16.153 22066.2/  
 C5H9OH-3OOH-1=>C5H10OH13+O2 1.0 0.0 0.0 ! Well skipping, no HP rates  
 PLOG/ 0.100 4.578E+21 -2.306 26972.3/  
 PLOG/ 1.000 1.682E+36 -6.885 32095.9/  
 PLOG/ 10.000 2.417E+42 -8.851 35271.3/  
 PLOG/ 100.000 1.060E+37 -7.211 34993.3/  
 C5H10OH13+O2=>C5H9OH-3OOH-1 1.0 0.0 0.0 ! well skipping, no HP rates  
 PLOG/ 1.000 1.560E+09 0.657 0.9/  
 PLOG/ 1.000 6.938E+45 -10.645 12930.5/  
 PLOG/ 10.000 3.195E+26 -4.943 5931.7/  
 PLOG/ 10.000 7.297E+67 -17.067 25562.2/  
 PLOG/ 100.000 2.548E-06 4.726 -4086.1/  
 PLOG/ 100.000 1.671E+39 -8.294 15632.4/  
 C5H9OH-3OOH-1=H2O+NC5KET13O 1.393E-03 3.588 614.1  
 PLOG/ 0.100 1.791E-04 3.740 -97.3/  
 PLOG/ 1.000 5.814E-07 4.635 -470.7/  
 PLOG/ 10.000 6.534E-03 3.366 821.5/  
 PLOG/ 100.000 1.663E-01 2.938 1327.0/  
 C5H9OH-3OOH-1=C5H9O1-3OH-1+OH 7.315E+09 0.355 14740.9  
 PLOG/ 0.100 3.034E+18 -2.881 15778.4/  
 PLOG/ 1.000 1.270E+16 -1.782 16066.0/  
 PLOG/ 10.000 1.039E+14 -0.998 15866.4/  
 PLOG/ 100.000 3.981E+12 -0.518 15556.5/  
 C5H9OH-3OOH-1=OH+C2H5CHO+C2H3OH 7.074E+08 1.126 22608.3  
 PLOG/ 0.100 1.725E+04 1.948 19694.6/  
 PLOG/ 1.000 1.053E+17 -1.765 24065.1/  
 PLOG/ 10.000 2.413E+15 -1.024 24301.4/  
 PLOG/ 100.000 2.834E+13 -0.357 23923.2/  
 C5H9OH-3OOH-5=C5H9OH-3OOH-1 2.513E+04 2.077 9217.4  
 PLOG/ 1.000 7.814E-13 7.263 4041.6/  
 PLOG/ 10.000 2.767E-10 6.525 5065.8/  
 PLOG/ 100.000 1.099E+04 2.158 8965.9/  
 C5H9OH-3OOH-5=>C5H10OH13+O2 1.0 0.0 0.0 ! Well skipping, no HP rates  
 PLOG/ 1.000 5.113E+08 1.907 21503.0/  
 PLOG/ 10.000 5.335E+13 0.515 24388.5/  
 PLOG/ 100.000 1.927E+24 -2.904 28678.5/  
 C5H10OH13+O2=>C5H9OH-3OOH-5 1.0 0.0 0.0 ! Well skipping, no HP rates  
 PLOG/ 1.000 1.040E+09 0.180 941.3/  
 PLOG/ 1.000 4.524E-68 25.830 -13979.4/  
 PLOG/ 10.000 3.677E+02 2.452 601.4/  
 PLOG/ 10.000 2.540E+15 -1.322 6629.4/  
 PLOG/ 100.000 1.761E+10 -0.084 3761.1/  
 PLOG/ 100.000 5.775E+54 -13.071 26273.2/  
 C5H9OH-3OOH-5=C5H9O3-5OH-1+OH 2.038E+11 -0.119 18286.1  
 PLOG/ 1.000 2.132E+28 -6.460 20456.4/  
 PLOG/ 10.000 7.774E+19 -3.135 19843.5/  
 PLOG/ 100.000 3.925E+15 -1.550 19314.5/

```

NC5KET13O=C2H5CHO+CH2CHO 7.769E+11 0.408 11384.3
  PLOG/ 1.000 2.639E+38 -8.786 16598.2/
  PLOG/ 10.000 4.434E+29 -5.613 15292.2/
  PLOG/ 100.000 6.320E+20 -2.564 13512.6/
!
! ROO4 Rates
!
C5H10OH-4O2=>O2+C5H10OH14 2.958E+34 -5.116 39813.8
  PLOG/ 0.100 9.490E+83 -21.957 50595.9/
  PLOG/ 1.000 2.072E+76 -19.138 49619.4/
  PLOG/ 10.000 2.967E+67 -16.033 48056.9/
  PLOG/ 100.000 3.819E+57 -12.680 45901.2/
O2+C5H10OH14=>C5H10OH-4O2 3.003E+12 0.166 0.6
  PLOG/ 0.100 6.107E+73 -20.669 13533.7/
  PLOG/ 0.100 2.455E+101 -28.891 26378.5/
  PLOG/ 1.000 2.420E+59 -15.686 10609.1/
  PLOG/ 1.000 6.234E+102 -28.918 28426.3/
  PLOG/ 10.000 3.527E+57 -14.962 10578.0/
  PLOG/ 10.000 1.825E+89 -24.166 26283.8/
  PLOG/ 100.000 6.181E+46 -11.264 8399.4/
  PLOG/ 100.000 1.389E+81 -21.200 26269.0/
C5H10OH-4O2=C5H9O1-4OH-1+OH 1.0 0.0 0.0 ! well skipping, no HP rates
  PLOG/ 0.100 2.106E+37 -8.005 29669.3/
  PLOG/ 1.000 6.867E+63 -16.768 37707.1/
  PLOG/ 10.000 2.803E+65 -17.495 38862.4/
  PLOG/ 100.000 1.396E+24 -4.289 28331.1/
C5H10OH-4O2=C5H9OH-4OOH-1 3.662E+07 1.052 14523.6
  PLOG/ 0.100 1.479E+06 1.343 13549.7/
  PLOG/ 1.000 1.568E+13 -0.875 15688.3/
  PLOG/ 10.000 1.254E+13 -0.798 15837.7/
  PLOG/ 100.000 2.191E+12 -0.522 15752.3/
C5H10OH-4O2=C5H9OH-4OOH-2 3.131E+05 1.876 15964.5
  PLOG/ 1.000 6.972E+06 1.055 14976.2/
  PLOG/ 10.000 2.467E+02 2.723 14516.9/
  PLOG/ 100.000 8.198E+08 0.695 16618.9/
C5H9OH-4OOH-1=>O2+C5H10OH14 1.0 0.0 0.0 ! well skipping, no HP rates
  PLOG/ 0.100 3.622E+54 -13.138 34098.9/
  PLOG/ 1.000 3.001E+64 -16.146 38452.4/
  PLOG/ 10.000 1.170E+58 -13.968 38453.5/
  PLOG/ 100.000 6.401E+49 -11.341 37505.2/
O2+C5H10OH14=>C5H9OH-4OOH-1 1.0 0.0 0.0 ! well skipping, no HP rates
  PLOG/ 1.000 2.965E+51 -13.524 9840.1/
  PLOG/ 1.000 6.245E+76 -20.838 21768.8/
  PLOG/ 10.000 5.600E+186 -59.319 41632.0/
  PLOG/ 10.000 8.123E+52 -13.152 15595.4/
  PLOG/ 100.000 5.214E+20 -3.488 4410.8/
  PLOG/ 100.000 1.394E+59 -14.825 22087.6/
C5H9OH-4OOH-1=C5H9O1-4OH-1+OH 1.720E+10 0.183 10706.9
  PLOG/ 0.100 3.446E+22 -4.042 13276.6/
  PLOG/ 1.000 2.573E+17 -2.203 12466.1/
  PLOG/ 10.000 5.641E+13 -0.956 11685.5/
  PLOG/ 100.000 1.267E+12 -0.412 11267.5/
C5H9OH-4OOH-1=OH+C3H6OHCOCH3 2.896E-05 4.553 12534.7! new species in mechanism
!(5_hydroxy_2_pentanone, SMILES=CC(=O)CCCO )
  PLOG/ 0.100 4.629E+00 2.763 13184.7/
  PLOG/ 1.000 9.409E-03 3.568 12450.4/

```

```

PLOG/ 10.000 2.006E-01 3.272 13430.2/
PLOG/ 100.000 8.907E-02 3.434 13548.9/
C5H9OH-4OOH-2=>O2+C5H10OH14 1.0 0.0 0.0 ! well skipping, no HP rates
PLOG/ 1.000 5.519E-16 10.387 17735.2/
PLOG/ 10.000 1.879E+23 -2.248 27690.1/
PLOG/ 100.000 9.667E+34 -5.931 32396.6/
O2+C5H10OH14=>C5H9OH-4OOH-2 1.0 0.0 0.0 ! well skipping, no HP rates
PLOG/ 100.000 1.903E+21 -3.680 4905.7/
PLOG/ 100.000 1.576E+58 -14.538 22360.9/
C5H9OH-4OOH-2=OH+C5H9O2-4OH-1 1.186E+14 -0.172 19194.2
PLOG/ 1.000 5.732E+21 -3.968 17536.3/
PLOG/ 10.000 6.375E+23 -3.859 20047.1/
PLOG/ 100.000 3.618E+16 -1.128 19304.9/
!

```

## B) Predicted modeling data:

**Table S19.** Predicted IDT values for n-butanol.

| P = 15 bar, Phi = 1 |              |                                        |          |              |                                              |                              |
|---------------------|--------------|----------------------------------------|----------|--------------|----------------------------------------------|------------------------------|
| Temp (K)            | 1000/T (1/K) | Experimental IDT (Weber <sup>3</sup> ) | Temp (K) | 1000/T (1/K) | Predicted IDT (Saggese et al. <sup>4</sup> ) | Predicted IDT (current work) |
| 725                 | 1.38         | 66.76                                  | 725      | 1.38         | 36.4                                         | 80.0                         |
| 737                 | 1.36         | 49.8                                   | 737      | 1.36         | 33.3                                         | 73.0                         |
| 758                 | 1.32         | 36.16                                  | 758      | 1.32         | 28.1                                         | 66.0                         |
| 784                 | 1.27         | 28.64                                  | 784      | 1.27         | 21.8                                         | 46.7                         |
| 787                 | 1.27         | 23.24                                  | 787      | 1.27         | 21.0                                         | 46.3                         |
| 816                 | 1.23         | 20.64                                  | 816      | 1.23         | 14.7                                         | 32.5                         |
| 826                 | 1.21         | 17.6                                   | 826      | 1.21         | 12.9                                         | 28.6                         |
| 839                 | 1.19         | 15.32                                  | 839      | 1.19         | 10.7                                         | 24.8                         |
| P = 20 bar, Phi = 1 |              |                                        |          |              |                                              |                              |
| Temp (K)            | 1000/T (1/K) | Experimental IDT (Agbro <sup>5</sup> ) | Temp (K) | 1000/T (1/K) | Predicted IDT (Saggese et al. <sup>4</sup> ) | Predicted IDT (current work) |
| 848                 | 1.18         | 5.8                                    | 854      | 1.17         | 6.6                                          | 12.3                         |
| 828                 | 1.21         | 6.5                                    | 830      | 1.20         | 7.9                                          | 14.5                         |
| 805                 | 1.24         | 8.5                                    | 810      | 1.23         | 8.5                                          | 19.8                         |
| 775                 | 1.29         | 13.0                                   | 781      | 1.28         | 14.9                                         | 29.8                         |
| 756                 | 1.32         | 14.5                                   | 763      | 1.31         | 17.7                                         | 33.1                         |
| 737                 | 1.36         | 19.7                                   | 744      | 1.34         | 24.3                                         | 53.4                         |
| 722                 | 1.38         | 29.5                                   | 726      | 1.38         | 28.2                                         | 51.8                         |
| 696                 | 1.44         | 37.9                                   | 700      | 1.43         | 50                                           | 80.3                         |

<sup>3</sup> B. W. Weber, K. Kumar, Y. Zhang, and C.-J. Sung, Autoignition of n-butanol at elevated pressure and low-to-intermediate temperature, *Combust. Flame* 158 (5) (2001) 809–819.

<sup>4</sup> C. Saggese *et al.*, An improved detailed chemical kinetic model for C3-C4 linear and iso-alcohols and their blends with gasoline at engine-relevant conditions, *Proc. Combust. Inst.* 38 (2020) 415-423.

<sup>5</sup> E. Agbro, A. S. Tomlin, M. Lawes, S. Park, and S. M. Sarathy, “The influence of n-butanol blending on the ignition delay times of gasoline and its surrogate at high pressures,” *Fuel* 187 (2017) 211–219.

| 671                        | 1.49         | 59.2                                   | 678      | 1.47         | 111.5                                        | 179                          |
|----------------------------|--------------|----------------------------------------|----------|--------------|----------------------------------------------|------------------------------|
| <b>P = 30 bar, Phi = 1</b> |              |                                        |          |              |                                              |                              |
| Temp (K)                   | 1000/T (1/K) | Experimental IDT (Weber <sup>3</sup> ) | Temp (K) | 1000/T (1/K) | Predicted IDT (Saggese et al. <sup>4</sup> ) | Predicted IDT (current work) |
| 678                        | 1.474        | 72.32                                  | 678      | 1.474        | 60.9                                         | 95.4                         |
| 680                        | 1.470        | 67.8                                   | 680      | 1.471        | 51.9                                         | 80.4                         |
| 695                        | 1.44         | 42.24                                  | 695      | 1.44         | 29.0                                         | 43.9                         |
| 708                        | 1.41         | 23.24                                  | 708      | 1.41         | 18.9                                         | 29.9                         |
| 725                        | 1.38         | 13.32                                  | 725      | 1.38         | 14.3                                         | 24.3                         |
| 739                        | 1.35         | 12.24                                  | 739      | 1.35         | 10.6                                         | 19.3                         |
| 750                        | 1.33         | 9.96                                   | 750      | 1.33         | 8.3                                          | 15.8                         |
| 761                        | 1.31         | 7.72                                   | 761      | 1.31         | 7.1                                          | 14.0                         |

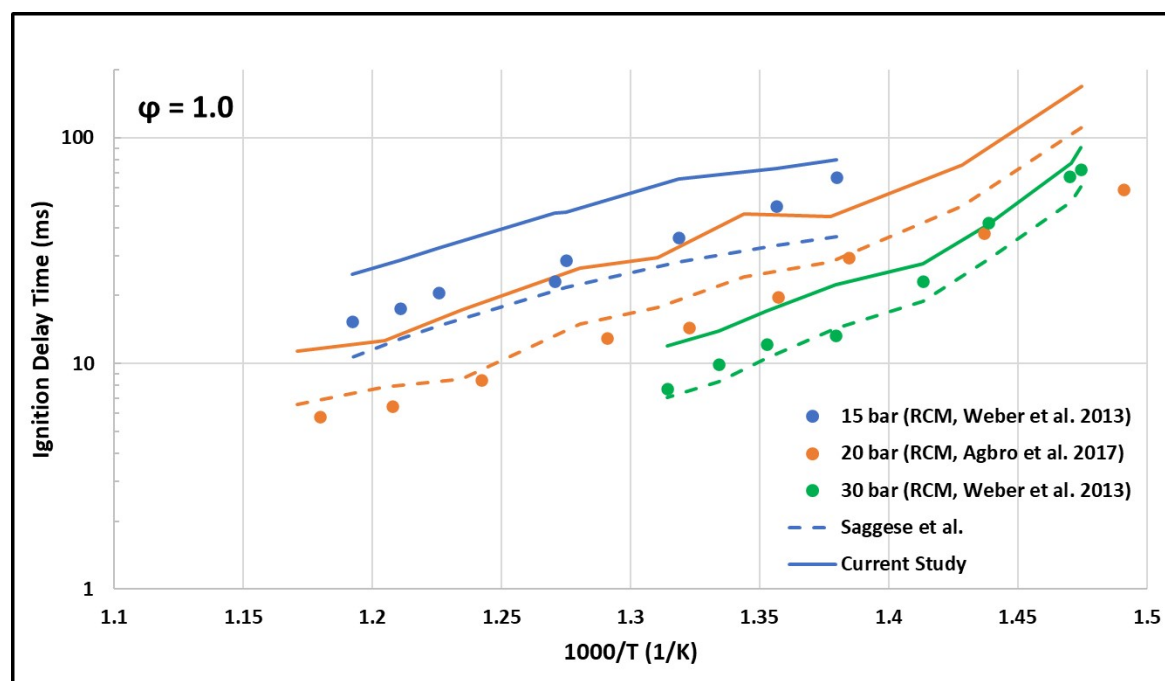

**Figure S10.** Comparison of predicted n-butanol IDTs between the Saggese et al.<sup>4</sup> and updated mechanisms.

**Table S20.** Predicted IDT values for n-pentanol.

| <b>P = 9 bar, Phi = 1 (Shock Tube)</b> |              |                                                |          |              |                                              |                              |
|----------------------------------------|--------------|------------------------------------------------|----------|--------------|----------------------------------------------|------------------------------|
| Temp (K)                               | 1000/T (1/K) | Experimental IDT (Heufer et al. <sup>6</sup> ) | Temp (K) | 1000/T (1/K) | Predicted IDT (Sarathy et al. <sup>7</sup> ) | Predicted IDT (current work) |
| 1209                                   | 0.83         | 0.10                                           | 880      | 1.14         | 18.38                                        | 21.90                        |
| 1149                                   | 0.87         | 0.19                                           | 900      | 1.11         | 15.41                                        | 17.80                        |
| 1086                                   | 0.92         | 0.45                                           | 920      | 1.09         | 12.27                                        | 13.70                        |
| 1069                                   | 0.94         | 0.65                                           | 940      | 1.06         | 9.39                                         | 10.20                        |

<sup>6</sup> K. A. Heufer, J. Bugler, and H. J. Curran, A comparison of longer alkane and alcohol ignition including new experimental results for n-pentanol and n-hexanol, *Proc. Combust. Inst.* 34 (2013) 511-518.

<sup>7</sup> S. M. Sarathy, P. Oßwald, N. Hansen, and K. Kohse-Höinghaus, Alcohol combustion chemistry, *Prog. Energy Combust. Sci.* 44 (2014) 40-102.

|                                         |                     |                                                       |                 |                     |                                                   |                                     |
|-----------------------------------------|---------------------|-------------------------------------------------------|-----------------|---------------------|---------------------------------------------------|-------------------------------------|
| 1012                                    | 0.99                | 0.98                                                  | 960             | 1.04                | 6.98                                              | 7.40                                |
| 950                                     | 1.05                | 1.94                                                  | 980             | 1.02                | 5.10                                              | 5.34                                |
| 963                                     | 1.04                | 2.08                                                  | 1000            | 1.00                | 3.70                                              | 3.83                                |
| 920                                     | 1.09                | 3.15                                                  | 1020            | 0.98                | 2.68                                              | 2.75                                |
| 882                                     | 1.13                | 5.13                                                  | 1040            | 0.96                | 1.95                                              | 2.00                                |
|                                         |                     |                                                       | 1060            | 0.94                | 1.43                                              | 1.47                                |
|                                         |                     |                                                       | 1080            | 0.93                | 1.06                                              | 1.09                                |
|                                         |                     |                                                       | 1100            | 0.91                | 0.80                                              | 0.83                                |
|                                         |                     |                                                       | 1120            | 0.89                | 0.61                                              | 0.63                                |
|                                         |                     |                                                       | 1140            | 0.88                | 0.47                                              | 0.48                                |
|                                         |                     |                                                       | 1160            | 0.86                | 0.36                                              | 0.38                                |
|                                         |                     |                                                       | 1180            | 0.85                | 0.29                                              | 0.30                                |
|                                         |                     |                                                       | 1200            | 0.83                | 0.22                                              | 0.23                                |
|                                         |                     |                                                       | 1220            | 0.82                | 0.18                                              | 0.19                                |
| <b>P = 30 bar, Phi = 1 (Shock Tube)</b> |                     |                                                       |                 |                     |                                                   |                                     |
| <b>Temp (K)</b>                         | <b>1000/T (1/K)</b> | <b>Experimental IDT (Heufer et al.<sup>6</sup>)</b>   | <b>Temp (K)</b> | <b>1000/T (1/K)</b> | <b>Predicted IDT (Sarathy et al.<sup>8</sup>)</b> | <b>Predicted IDT (current work)</b> |
| 1124                                    | 0.89                | 0.09                                                  | 720             | 1.39                | 15.70                                             | 14.5                                |
| 1090                                    | 0.92                | 0.19                                                  | 740             | 1.35                | 8.89                                              | 8.1                                 |
| 1091                                    | 0.92                | 0.22                                                  | 760             | 1.32                | 5.52                                              | 5.0                                 |
| 1038                                    | 0.96                | 0.33                                                  | 780             | 1.28                | 3.79                                              | 3.4                                 |
| 980                                     | 1.02                | 0.81                                                  | 800             | 1.25                | 2.92                                              | 2.6                                 |
| 925                                     | 1.08                | 1.01                                                  | 820             | 1.22                | 2.51                                              | 2.3                                 |
| 914                                     | 1.09                | 1.20                                                  | 840             | 1.19                | 2.37                                              | 2.3                                 |
| 885                                     | 1.13                | 1.35                                                  | 860             | 1.16                | 2.40                                              | 2.5                                 |
| 834                                     | 1.20                | 1.77                                                  | 880             | 1.14                | 2.45                                              | 2.8                                 |
| 819                                     | 1.22                | 1.65                                                  | 900             | 1.11                | 2.40                                              | 2.9                                 |
| 752                                     | 1.33                | 2.33                                                  | 920             | 1.09                | 2.22                                              | 2.7                                 |
| 736                                     | 1.36                | 3.79                                                  | 940             | 1.06                | 1.94                                              | 2.30                                |
|                                         |                     |                                                       | 960             | 1.04                | 1.61                                              | 1.90                                |
|                                         |                     |                                                       | 980             | 1.02                | 1.29                                              | 1.50                                |
|                                         |                     |                                                       | 1000            | 1.00                | 1.01                                              | 1.10                                |
|                                         |                     |                                                       | 1020            | 0.98                | 0.77                                              | 0.83                                |
|                                         |                     |                                                       | 1040            | 0.96                | 0.59                                              | 0.62                                |
|                                         |                     |                                                       | 1060            | 0.94                | 0.44                                              | 0.46                                |
|                                         |                     |                                                       | 1080            | 0.93                | 0.34                                              | 0.34                                |
|                                         |                     |                                                       | 1100            | 0.91                | 0.26                                              | 0.26                                |
|                                         |                     |                                                       | 1120            | 0.89                | 0.20                                              | 0.2                                 |
|                                         |                     |                                                       | 1140            | 0.88                | 0.15                                              | 0.15                                |
| <b>P = 10 bar, Phi = 1 (RCM)</b>        |                     |                                                       |                 |                     |                                                   |                                     |
| <b>Temp (K)</b>                         | <b>1000/T (1/K)</b> | <b>Experimental IDT (Pelucchi et al.<sup>8</sup>)</b> | <b>Temp (K)</b> | <b>1000/T (1/K)</b> | <b>Predicted IDT (Sarathy et al.<sup>8</sup>)</b> | <b>Predicted IDT (current work)</b> |
| 711                                     | 1.406               | 85.0                                                  | 710             | 1.4075              | 837.20                                            | 684.00                              |

<sup>8</sup> M. Pelucchi *et al.*, Combustion of n-C3–C6 Linear Alcohols: An Experimental and Kinetic Modeling Study. Part II: Speciation Measurements in a Jet-Stirred Reactor, Ignition Delay Time Measurements in a Rapid Compression Machine, Model Validation, and Kinetic Analysis, *Energy Fuels*, 34 (11) (2020) 14708–14725.



|     |       |      |     |        |        |        |
|-----|-------|------|-----|--------|--------|--------|
| 710 | 1.408 | 77.7 | 725 | 1.3793 | 157.20 | 133.20 |
| 711 | 1.406 | 76.3 | 743 | 1.3459 | 56.90  | 51.20  |
| 710 | 1.408 | 77.2 | 762 | 1.3123 | 25.90  | 24.20  |
| 725 | 1.379 | 45.4 | 780 | 1.2821 | 19.00  | 20.20  |
| 725 | 1.379 | 47.5 | 797 | 1.2547 | 17.91  | 19.60  |
| 725 | 1.379 | 44.1 | 817 | 1.224  | 19.00  | 22.00  |
| 743 | 1.346 | 26.9 | 837 | 1.1947 | 21.95  | 27.00  |
| 744 | 1.344 | 30.3 |     |        |        |        |
| 742 | 1.348 | 28.9 |     |        |        |        |
| 743 | 1.346 | 27.1 |     |        |        |        |
| 761 | 1.314 | 25.9 |     |        |        |        |
| 762 | 1.312 | 24.1 |     |        |        |        |
| 762 | 1.312 | 23.1 |     |        |        |        |
| 779 | 1.284 | 26.2 |     |        |        |        |
| 781 | 1.280 | 24.5 |     |        |        |        |
| 780 | 1.282 | 23.9 |     |        |        |        |
| 797 | 1.255 | 27.6 |     |        |        |        |
| 796 | 1.256 | 26.6 |     |        |        |        |
| 797 | 1.255 | 27.0 |     |        |        |        |
| 817 | 1.224 | 30.5 |     |        |        |        |
| 816 | 1.225 | 31.3 |     |        |        |        |
| 818 | 1.222 | 31.1 |     |        |        |        |
| 837 | 1.195 | 32.0 |     |        |        |        |
| 836 | 1.196 | 31.6 |     |        |        |        |
| 838 | 1.193 | 33.3 |     |        |        |        |

**P = 19 bar, Phi = 1 (RCM)**

| <b>Temp (K)</b> | <b>1000/T (1/K)</b> | <b>Experimental IDT (Heufer et al.<sup>6</sup>)</b> | <b>Temp (K)</b> | <b>1000/T (1/K)</b> | <b>Predicted IDT (Sarathy et al.<sup>8</sup>)</b> | <b>Predicted IDT (current work)</b> |
|-----------------|---------------------|-----------------------------------------------------|-----------------|---------------------|---------------------------------------------------|-------------------------------------|
| 675             | 1.481               | 78.0                                                | 357             | 1.48                | 1252                                              | 1112                                |
| 675             | 1.481               | 84.0                                                | 364             | 1.45                | 420                                               | 344                                 |
| 691             | 1.447               | 43.0                                                | 382             | 1.42                | 59                                                | 51                                  |
| 688             | 1.453               | 34.8                                                |                 |                     |                                                   |                                     |
| 704             | 1.420               | 20.8                                                |                 |                     |                                                   |                                     |
| 705             | 1.418               | 16.3                                                |                 |                     |                                                   |                                     |
|                 |                     |                                                     |                 |                     |                                                   |                                     |

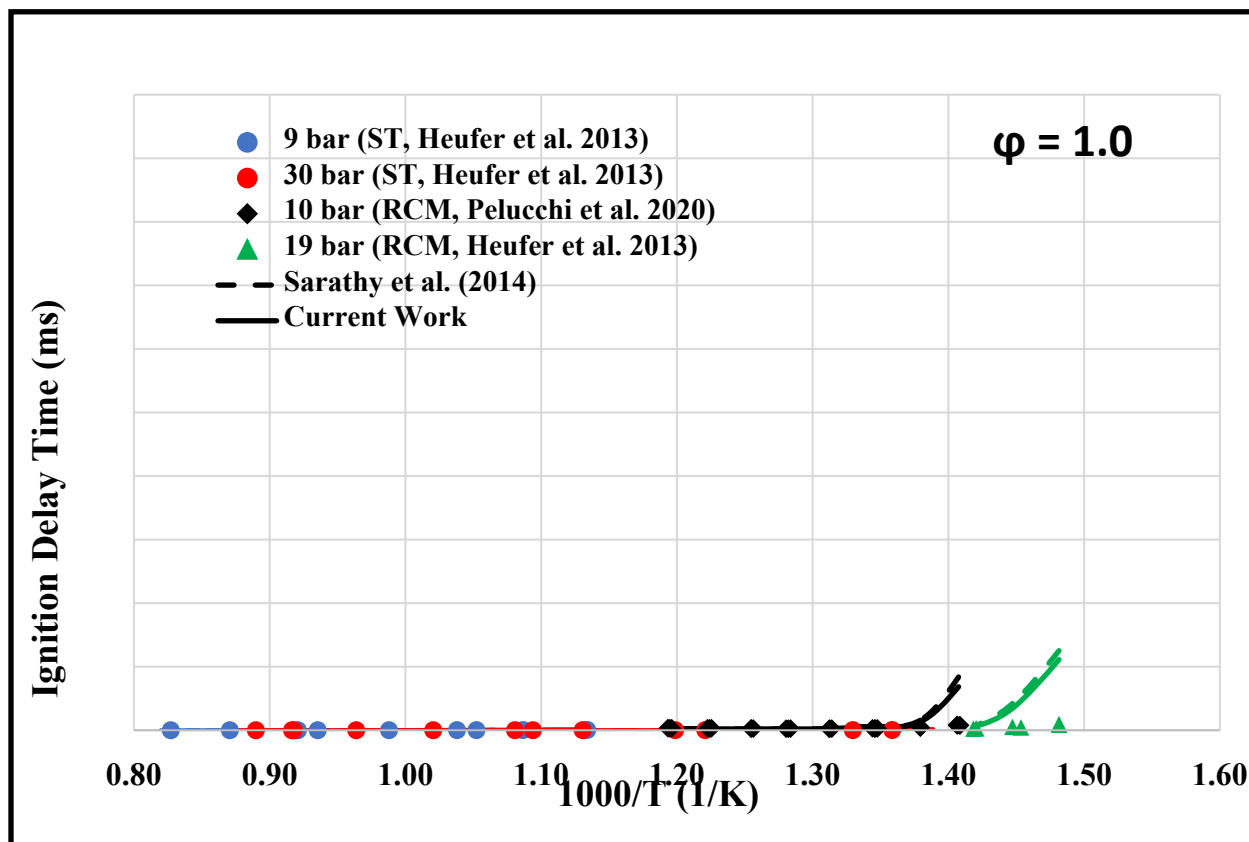

**Figure S11.** Comparison of predicted n-pentanol IDTs between the base and updated mechanisms.
